# Supplementary material
Source: publisher site journal article supplement (https://vcs.pensoft.net/article/98324/download/suppl/33/)
Supplement: Supplementary file 1

## Sheet: Readme
Supplementary material to
Dengler, J., Jansen., F., … & Gillet, F. (2023) Ecological Indicator Values for Europe (EIVE) 1.0. Vegetation Classification and Survey.
Supplementary material 3. Documentation of additions to and modifications of the taxonomic backbone from Euro+Med (2022) in EIVE 1.0
Based on EIVE_Taxonomic_documentation_v.40.xlsx

## Sheet: Table S3.1. Additional taxa
Taxon.accepted	Authority.accepted	Family	Category	Source for name
Abies nephrolepis	Maxim.	Pinaceae	Neophyte	WFO (2022)
Acacia baileyana	F.Muell.	Fabaceae	Neophyte	WFO (2022)
Acacia cultriformis	A.Cunn. ex G.Don	Fabaceae	Neophyte	WFO (2022)
Acacia retinoides	Schltdl.	Fabaceae	Neophyte	WFO (2022)
Acanthophyllum pungens	Boiss.	Caryophilaceae	Neophyte	WFO (2022)
Acer caudatum subsp. ukurundense	(Trautv. & C.A.Mey.) E.Murray	Sapindaceae	Neophyte	WFO (2022)
Acer pictum subsp. mono	(Maxim.) H.Ohashi		Neophyte	https://powo.science.kew.org/taxon/urn:lsid:ipni.org:names:976224-1
Acer tegmentosum	Maxim.	Sapindaceae	Neophyte	WFO (2022)
Acer ukurunduense	Trautv. & C.A. Mey.		Neophyte	https://powo.science.kew.org/taxon/781555-1
Achillea biserrata	M.Bieb.	Asteraceae	Neophyte	https://www.ipni.org/n/urn:lsid:ipni.org:names:173849-1
Achnatherum parviflorum	(Desf.) M.Nobis	Poaceae	Neophyte	https://powo.science.kew.org/taxon/77211533-1
Aconitum karakolicum	Rapaics	Ranunculaceae	Neophyte	WFO (2022)
Aconitum nanum	Simonk.	Ranunculaceae	Neophyte	WFO (2022)
Aconitum soongaricum	Stapf	Ranunculaceae	Neophyte	WFO (2022)
Actinidia chinensis	Planch.	Actinidiaceae	Neophyte	WFO (2022)
Actinidia kolomikta	(Maxim.) Maxim.		Neophyte	https://powo.science.kew.org/taxon/828402-1
Adenocarpus complicatus subsp. lainzii	Castrov.	Fabaceae	Native, endemic	WFO (2022)
Adenophora tricuspidata	A.DC.	Campanulaceae	Neophyte	WFO (2022)
Adiantum pedatum	L.	Pteridaceae	Neophyte	WFO (2022)
Agastache rugosa	Kuntze	Lamiaceae	Neophyte	WFO (2022)
Akebia quinata	(Thunb. ex Houtt.) Decne.	Lardizabalaceae	Neophyte	WFO (2022)
Alchemilla debilicaulis	Buser	Rosaceae	Native	Festi F. (2018) Alchemilla L. in: Pignatti S., Guarino, R., La Rosa M. (Eds.) Flora d'Italia, 2nd edition, vol. 2. Edagricole, Edizioni Agricole di New Business Media, Bologna.
Alchemilla firmiana	Buser	Rosaceae	Native	Festi F. (2018) Alchemilla L. in: Pignatti S., Guarino, R., La Rosa M. (Eds.) Flora d'Italia, 2nd edition, vol. 2. Edagricole, Edizioni Agricole di New Business Media, Bologna.
Alchemilla plicatula	Gand.	Rosaceae	Native, endemic	https://powo.science.kew.org/taxon/urn:lsid:ipni.org:names:720871-1
Alchemilla rhododendrophila	Buser		Native, endemic	https://powo.science.kew.org/taxon/720922-1
Alchemilla saliceti	S.E.Fröhner	Rosaceae	Native	http://www.worldfloraonline.org/taxon/wfo-0001011031
Alchemilla strigulosa	Buser		Native, endemic	https://powo.science.kew.org/taxon/urn:lsid:ipni.org:names:721158-1
Allium hollandicum	R.M.Fritsch	Amaryllidaceae	Neophyte	WFO (2022)
Alopecurus brachystylus	Peterm.	Poaceae	Neophyte	WFO (2022)
Amelanchier canadensis	(L.) Medik.		Neophyte	https://powo.science.kew.org/taxon/urn:lsid:ipni.org:names:721188-1
Ammodendron karelinii	Fisch. & C.A.Mey. ex Ledeb.	Fabaceae	Neophyte	WFO (2022)
Anabasis eriopoda	(Schrenk) Paulsen		Neophyte	https://powo.science.kew.org/taxon/163415-1
Anabasis truncata	(Schrenk) Bunge	Amarhantaceae	Neophyte	WFO (2022)
Anemonastrum crinitum	(Juz.) Holub	Ranunculaceae	Neophyte	WFO (2022)
Anthemis rigida subsp. rigida	[NA]	Asteraceae	Native, missing autonym	Böhling et al. (2002)
Anthoxanthum nitens	(Weber) Y.Schouten & Veldkamp	Poaceae	Neophyte	WFO (2022)
Anthyllis splendens	Willd.	Fabaceae	Neophyte	WFO (2022)
Anthyllis vulneraria subsp. guyotii	(Chodat) Grenon	Fabaceae	Native, endemic	Juillerat et al. (2017)
Anthyllis vulneraria subsp. versicolor	(Dalla Torre & Sarnth.) Gutermann	Fabaceae	Native, endemic	http://www.worldfloraonline.org/taxon/wfo-0001361021
Anthyllis vulneraria subsp. vulneraria	[NA]	Fabaceae	Native, missing autonym	Müller et al. (2021)
Anythyllis vulneraria subsp. gandogeri	Wale	Fabaceae	Native, endemic	POWO (2022), WFO (2022)
Arabis blepharophylla	Hook. & Arn.	Brassicaceae	Neophyte	WFO (2022)
Arabis procurrens var. vochinensis	(Spreng.) Govaerts	Brassicaceae	Neophyte	WFO (2022)
Aralia elata	(Miq.) Seem.	Araliaceae	Neophyte	WFO (2022)
Aronia melanocarpa	(Michx.) Elliott		Neophyte	https://powo.science.kew.org/taxon/1109609-2
Artemisia cina	O.Berg		Neophyte	https://powo.science.kew.org/taxon/urn:lsid:ipni.org:names:179351-1
Artemisia oliveriana	J.Gay ex Besser		Neophyte	https://powo.science.kew.org/taxon/urn:lsid:ipni.org:names:179897-1
Artemisia santolina	Schrenk		Native	https://powo.science.kew.org/taxon/urn:lsid:ipni.org:names:50972596-1
Artemisia sublessingiana	Krasch. ex Poljakov		Neophyte	https://powo.science.kew.org/taxon/urn:lsid:ipni.org:names:180165-1
Artemisia terrae-albae	Krasch.		Neophyte	https://powo.science.kew.org/taxon/urn:lsid:ipni.org:names:180206-1
Asperula crassula	Greuter & J.Zaffran	Rubiaceae	Native, endemic	WFO (2022)
Asperula staliana subsp. diomedea	Korica, Lausi et Ehrend.	Rubiaceae	Native	Pignatti S., Guarino, R., La Rosa M. (2017-2019) Flora d'Italia, 2nd edition. Edagricole, Edizioni Agricole di New Business Media, Bologna.
Aster alpinus subsp. alpinus	[NA]	Asteraceae	Native, missing autonym	Julve (2022)
Astragalus terraccianoi	Vals.	Fabaceae	Native, online in E+M	Euro+Med (2022)
Avenula pubescens subsp. pubescens	[NA]	Poaceae	Native, missing autonym
Bambusa multiplex	(Lour.) Raeusch. ex Schult. et Schult. fil.	Poaceae	Neophyte	WFO (2022)
Barbarea lepuznica	Nyár.	Brassicaceae	Neophyte	The IUCN Red List of Threatened Species
Berberis amurensis	Rupr.		Neophyte	https://powo.science.kew.org/taxon/urn:lsid:ipni.org:names:106405-1
Berberis julianae	C. K. Schn.		Neophyte	https://wfoplantlist.org/plant-list/taxon/wfo-0000563376-2022-06
Berberis sibirica	Pall.		Neophyte	https://powo.science.kew.org/taxon/urn:lsid:ipni.org:names:107079-1
Berberis verruculosa	Hemsl. & E.H.Wilson		Neophyte	https://wfoplantlist.org/plant-list/taxon/wfo-0000564007-2022-06
Betula alleghaniensis	Britton		Neophyte	https://powo.science.kew.org/taxon/urn:lsid:ipni.org:names:32106-2
Betula costata	Trautv.		Neophyte	https://powo.science.kew.org/taxon/urn:lsid:ipni.org:names:295064-1
Betula davurica	Pall.	Betulaceae	Neophyte	https://www.ipni.org/n/urn:lsid:ipni.org:names:30256350-2
Betula ermanii	Cham.		Neophyte	https://powo.science.kew.org/taxon/295076-1
Betula fruticosa	Pall.		Neophyte	https://powo.science.kew.org/taxon/urn:lsid:ipni.org:names:295088-1
Betula glandulosa	Michx.		Neophyte	https://powo.science.kew.org/taxon/urn:lsid:ipni.org:names:295091-1
Betula papyrifera	Marshall		Neophyte	https://powo.science.kew.org/taxon/32197-2
Betula pendula subsp. mandshurica	(Regel) Ashburner & McAll.		Neophyte	https://powo.science.kew.org/taxon/urn:lsid:ipni.org:names:77128716-1
Betula schmidtii	Regel		Neophyte	https://powo.science.kew.org/taxon/urn:lsid:ipni.org:names:295205-1
Biscutella ossolana	(Raffaelli & Baldoin) Landolt	Brassicaceae	Native, endemic	WFO (2022)
Biscutella prealpina	Raffaelli & Baldoin	Brassicaceae	Native, endemic	WFO (2022)
Bituminaria morisiana	(Pignatti et Metlesics) Greuter	Fabaceae	Native	Pignatti S., Guarino, R., La Rosa M. (2017-2019) Flora d'Italia, 2nd edition. Edagricole, Edizioni Agricole di New Business Media, Bologna.
Bletilla striata	(Thunb.) Rchb.f.	Orchidaceae	Neophyte	WFO (2022)
Botrychium tenebrosum	A.A.Eaton	Ophioglossaceae	Native, recently described	Dyntaxa (2022)
Boykinia richardsonii	(Hook.) A.Gray ex B.D.Jacks.	Saxifragaceae	Neophyte	WFO (2022)
Brassica juncea	(L.) Czern.	Brassicaceae	Neophyte	WFO (2022)
Buglossoides arvensis subsp. arvensis	[NA]	Boraginaceae	Native, missing autonym	Wisskirchen & Haeupler (1998)
Camellia japonica	L.		Neophyte	http://www.worldfloraonline.org/taxon/wfo-0000582404
Camellia sinensis	(L.) Kuntze		Neophyte	https://powo.science.kew.org/taxon/urn:lsid:ipni.org:names:828548-1
Carex duriuscula	C.A.Mey.		Native	https://powo.science.kew.org/taxon/299559-1
Carex grayi	J.Carey	Cyperaceae	Neophyte	WFO (2022)
Caryopteris incana	Miq.		Neophyte	http://www.worldfloraonline.org/taxon/wfo-0000808950
Cassiope ericoides	(Pall.) D.Don		Neophyte	https://powo.science.kew.org/taxon/urn:lsid:ipni.org:names:327315-1
Centaurea hanrii subsp. hanrii	[NA]	Asteraceae	Native, missing autonym	Julve (2022)
Centaurea stoebe subsp. stoebe	[NA]	Asteraceae	Native, missing autonym	Wisskirchen & Haeupler (1998)
Centaurea thuillieri	J. Duvign. & Lambinon	Asteraceae	Native	Euro+Med (2022)
Cephalaria syriaca subsp. syriaca	[NA]	Dipsacaceae	Native, missing autonym	Julve (2022)
Cereus jamacaru	DC.	Cactaceae	Neophyte	WFO (2022)
Chaenomeles japonica	(Thunb.) Lindl. ex Spach	Rosaceae	Neophyte	WFO (2022)
Chenopodium album subsp. album	[NA]	Chenopodiaceae	Native, missing autonym	Wisskirchen & Haeupler (1998)
Chenopodium leptophyllum	(Nutt. ex Moq.) B.D.Jacks.	Amaranthaceae	Neophyte	WFO (2022)
Circaea cordata	Royle		Neophyte	https://powo.science.kew.org/taxon/urn:lsid:ipni.org:names:611453-1
Citrus limon	(L.) Osbeck	Rutaceae	Neophyte	WFO (2022)
Clematis alpina subsp. ochotensis	(Pall.) Kuntze		Neophyte	https://powo.science.kew.org/taxon/urn:lsid:ipni.org:names:60464110-2
Clematis hexapetala	Pall.		Neophyte	https://powo.science.kew.org/taxon/709765-1
Colutea insularis	Browicz	Fabaceae	Native, endemic	WFO (2022)
Convolvulus fruticosus	Pall.	Convolvulaceae	Native	WFO (2022)
Corispermum laxiflorum	Schrenk		Neophyte	https://powo.science.kew.org/taxon/165410-1
Corydalis gigantea	Trautv. & C.A.Mey.		Neophyte	https://powo.science.kew.org/taxon/urn:lsid:ipni.org:names:672243-1
Corydalis pauciflora	(Stephan) Pers.		Neophyte	https://powo.science.kew.org/taxon/672418-1
Cotoneaster adpressus	Bois	Rosaceae	Neophyte	WFO (2022)
Cotoneaster ascendens	Decne.	Rosaceae	Neophyte	WFO (2022)
Cotoneaster hjelmqvistii	Flinck & B.Hylmö	Rosaceae	Neophyte	WFO (2022)
Cotoneaster latifolius	J.Fryer & B.Hylmö	Rosaceae	Neophyte	WFO (2022)
Cotoneaster nanshan	A.Vilm. & Millet ex Millet	Rosaceae	Neophyte	WFO (2022)
Cotoneaster perpusillus	(C.K.Schneid.) Flinck & B.Hylmö	Rosaceae	Neophyte	WFO (2022)
Cotoneaster sylvestrii	Pamp.	Rosaceae	Neophyte	https://powo.science.kew.org/taxon/urn:lsid:ipni.org:names:722681-1
Cotoneaster tomentellus	Pojark.	Rosaceae	Neophyte	WFO (2022)
Cotoneaster uniflorus	Bunge		Neophyte	https://powo.science.kew.org/taxon/urn:lsid:ipni.org:names:722721-1
Crataegus chlorosarca	Maxim.		Neophyte	https://powo.science.kew.org/taxon/723117-1
Crataegus dahurica	(Dieck) Koehne		Neophyte	https://powo.science.kew.org/taxon/urn:lsid:ipni.org:names:723227-1
Crataegus maximowiczii	C.K.Schneid.		Neophyte	https://powo.science.kew.org/taxon/urn:lsid:ipni.org:names:723770-1
Crataegus persimilis	Sarg.		Neophyte	https://wfoplantlist.org/plant-list/taxon/wfo-0000984309-2022-06
Crataegus pinnatifida	Bunge		Neophyte	https://powo.science.kew.org/taxon/724002-1
Crataegus submollis	Sarg.	Rosaceae	Neophyte	WFO (2022)
Crocosmia pottsii	(Baker) N.E.Br.	Iridaceae	Neophyte, parent of	WFO (2022)
Cupressus nootkatensis	D.Don	Cupressaceae	Neophyte, parent of	WFO (2022)
Cyclanthera pedata	Schrad.	Cucurbitaceae	Neophyte	WFO (2022)
Cymbalaria glutinosa	Bigazzi et Raffaelli	Plantaginaceae	Native	WFO (2022)
Cytisus hirsutus subsp. hirsutus	[NA]	Fabaceae	Native, missing autonym	[ad hoc]
Daphne altaica	Pall.		Neophyte	https://powo.science.kew.org/taxon/urn:lsid:ipni.org:names:831137-1
Daphne reichsteinii	Landolt & E. Hauser	Thymelaeaceae	Native, endemic	Pignatti S., Guarino, R., La Rosa M. (2017-2019) Flora d'Italia, 2nd edition. Edagricole, Edizioni Agricole di New Business Media, Bologna.
Daphne sericea subsp. sericea	[NA]	Thymelaeaceae	Native, missing autonym
Delphinium camptocarpum	Fisch. & C.A.Mey.		Neophyte	https://powo.science.kew.org/taxon/urn:lsid:ipni.org:names:710467-1
Diapensia obovata	(F.Schmidt) Nakai		Neophyte	https://powo.science.kew.org/taxon/urn:lsid:ipni.org:names:316121-1
Dicentra peregrina	(Rudolph) Makino		Neophyte	https://powo.science.kew.org/taxon/urn:lsid:ipni.org:names:672652-1
Echinochloa colona	(L.) Link	Poaceae	Native, online in E+M	Euro+Med (2022)
Eleocharis obtusa	(Willd.) Schult.	Cyperaceae	Neophyte	WFO (2022)
Eleutherococcus sessiliflorus	(Rupr. & Maxim.) S.Y.Hu		Neophyte	https://powo.science.kew.org/taxon/urn:lsid:ipni.org:names:90433-1
Elymus juncetiformis	(Á. Löve & D. Löve) Hand & Buttler	Poaceae	Neophyte, parent of	Müller et al. (2021)
Eremurus robustus	(Regel) Regel		Neophyte	https://powo.science.kew.org/taxon/urn:lsid:ipni.org:names:534729-1
Erigeron alpinus subsp. alpinus	[NA]	Asteraceae	Native, missing autonym
Erigeron glabratus subsp. glabratus	[NA]	Asteraceae	Native, missing autonym
Erysimum perofskianum	Fisch. & C.A.Mey.	Brassicaceae	Neophyte, parent of
Erythronium sibiricum	(Fisch. & C.A.Mey.) Krylov		Neophyte	https://powo.science.kew.org/taxon/urn:lsid:ipni.org:names:534964-1
Euonymus maackii	Rupr.		Neophyte	https://powo.science.kew.org/taxon/160989-1
Euphorbia microcarpa	(Prokh.) Krylov	Euphorbiaceae	Native	http://www.worldfloraonline.org/taxon/wfo-0000963353
Euphorbia turczaninowii	Kar. & Kir.		Neophyte	https://powo.science.kew.org/taxon/348597-1
Ferula foetida	(Bunge) Regel		Neophyte	https://powo.science.kew.org/taxon/urn:lsid:ipni.org:names:842277-1
Festuca marginata subsp. marginata	[NA]	Poaceae	Native, missing autonym	https://powo.science.kew.org/taxon/urn:lsid:ipni.org:names:77169141-1
Filipendula camtschatica	(Pall.) Maxim.	Rosaceae	Neophyte	WFO (2022)
Filipendula digitata	(Willd.) Bergmans		Neophyte	https://powo.science.kew.org/taxon/urn:lsid:ipni.org:names:77221978-1
Fraxinus angustifolia subsp. danubialis	Pouzar	Oleaceae	Native, online in E+M	Euro+Med (2022)
Fraxinus mandshurica	Rupr.		Neophyte	https://powo.science.kew.org/taxon/urn:lsid:ipni.org:names:609086-1
Fritillaria tubaeformis	Gren. & Godr.	Liliaceae	Native, online in E+M	Euro+Med (2022)
Galatella hauptii	(Ledeb.) Lindl. ex DC.		Neophyte	https://powo.science.kew.org/taxon/urn:lsid:ipni.org:names:208456-1
Galatella linosyris subsp. linosyris	[NA]	Asteraceae	Native, missing autonym
Galium extensum	Krendl	Rubiaceae	Native, endemic	WFO (2022)
Galium pseudoaristatum	Schur	Rubiaceae	Native, online in E+M	Euro+Med (2022)
Gamanthus gamocarpus	(Moq.) Bunge		Neophyte	https://powo.science.kew.org/taxon/165614-1
Genista pilosa subsp. pilosa	[NA]	Fabaceae	Native, missing autonym
Gentiana clusii subsp. clusii	[NA]	Gentianaceae	Native, missing autonym
Gunnera magellanica	Lam.	Gunneraceae	Neophyte	WFO (2022)
Halimocnemis villosa	Kar. & Kir.		Neophyte	https://powo.science.kew.org/taxon/urn:lsid:ipni.org:names:165719-1
Halothamnus subaphyllus	(C.A.Mey.) Botsch.		Neophyte	https://powo.science.kew.org/taxon/urn:lsid:ipni.org:names:908834-1
Haloxylon ammodendron	(C.A.Mey.) Bunge		Neophyte	https://powo.science.kew.org/taxon/urn:lsid:ipni.org:names:941607-1
Haplophyllum buxmaumii subsp. buxbaumii	[NA]	Rutaceae	Native, online in E+M	Euro+Med (2022)
Haplophyllum obtusifolium	(Ledeb. ex Eichw.) Ledeb.		Neophyte	https://powo.science.kew.org/taxon/urn:lsid:ipni.org:names:771307-1
Hedypnois rhagadioloides subsp. rhagadioloides	[NA]	Asteraceae	Native, missing autonym
Helenium autumnale	L.	Asteraceae	Neophyte	http://www.worldfloraonline.org/taxon/wfo-0000124883
Helianthemum tinetense	M.Mayor & Fern.Benito	Cistaceae	Native, endemic	POWO (2022), WFO (2022)
Heracleum dissectum	Ledeb.		Neophyte	https://powo.science.kew.org/taxon/urn:lsid:ipni.org:names:843016-1
Hesperis laciniata subsp. cupaniana	(Guss.) Giardina et Raimondo	Brassicaceae	Native
Heuchera americana	L.		Neophyte	http://www.worldfloraonline.org/taxon/wfo-0001135392
Hieracium subpojoritense	Prodan	Asteraceae	Native, endemic	Flora Europaea (1976)
Hieracium tomiasaeforme	(Nyár.) Nyár.	Asteraceae	Native, endemic	Flora Europaea (1976)
Himantoglossum samariense	C.Alibertis & A.Alibertis	Orchidaceae	Native, endemic	WFO (2022)
Iberis intermedia subsp. intermedia	[NA]	Brassicaceae	Native, missing autonym
Inula racemosa	Hook.f.	Asteraceae	Neophyte	WFO (2022)
Iris sanguinea	Hornem.	Iridaceae	Neophyte	https://powo.science.kew.org/taxon/439065-1
Iris setosa	Pall. ex Link	Iridaceae	Neophyte	WFO (2022)
Iris songarica	Schrenk ex Fisch. & C.A.Mey.		Neophyte	https://powo.science.kew.org/taxon/439100-1
Jacobaea vulgaris subsp. vulgaris	[NA]	Asteraceae	Native, missing autonym
Juniperus pseudosabina	Fisch. & C.A.Mey.		Neophyte	https://powo.science.kew.org/taxon/urn:lsid:ipni.org:names:262316-1
Juniperus semiglobosa	Regel		Neophyte	https://powo.science.kew.org/taxon/urn:lsid:ipni.org:names:262351-1
Juniperus seravschanica	Kom.		Neophyte	https://powo.science.kew.org/taxon/urn:lsid:ipni.org:names:676868-1
Jurinea mollis subsp. mollis	[NA]	Asteraceae	Native, missing autonym
Kalopanax septemlobus subsp. septemlobus	(Thunb.) Koidz.		Neophyte	https://powo.science.kew.org/taxon/urn:lsid:ipni.org:names:77169535-1
Kolkwitzia amabilis	(Graebn.) Christenh.	Caprifoliaceae	Neophyte	WFO (2022)
Lantana camara	L.	Verbenaceae	Native, online in E+M	Euro+Med (2022)
Larix laricina	(Du Roi) K.Koch	Pinaceae	Neophyte	WFO (2022)
Lemna japonica	Landolt	Araceae	Native, recently described	WFO (2022)
Leontodon crispus subsp. crispus	[NA]	Asteraceae	Native, missing autonym
Leontopodium leontopodinum	(DC.) Hand.-Mazz.	Asteraceae	Neophyte	https://powo.science.kew.org/taxon/urn:lsid:ipni.org:names:229619-1
Leontopodium leontopodioides	Beauverd	Asteraceae	Neophyte	https://powo.science.kew.org/taxon/229620-1
Leonurus tataricus	L.		Neophyte	https://powo.science.kew.org/taxon/urn:lsid:ipni.org:names:449237-1
Ligustrum ibota	Sieb.		Neophyte	http://www.worldfloraonline.org/taxon/wfo-0000816313
Ligustrum lucidum	W. T. Aiton	Oleaceae	Native, online in E+M	Euro+Med (2022)
Ligustrum sinense	Lour.	Oleaceae	Native, online in E+M
Lilium bulbiferum subsp. bulbiferum	[NA]	Liliaceae	Native, missing autonym
Lilium bulbiferum subsp. croceum	(Chaix) Arcang.	Lamiaceae	Native	https://europlusmed.org/cdm_dataportal/taxon/4d545253-8fb7-41db-8f25-0f2e119bd2b1
Lilium pensylvanicum	Ker Gawl.	Liliaceae	Neophyte	https://powo.science.kew.org/taxon/537717-1
Limonium britannicum	Ingr.		Native, endemic	https://powo.science.kew.org/taxon/929581-1
Limonium loganicum	Ingr.		Native, endemic	https://powo.science.kew.org/taxon/urn:lsid:ipni.org:names:929583-1
Limonium otolepis	(Schrenk) Kuntze		Neophyte	https://powo.science.kew.org/taxon/686902-1
Limonium parvum	Ingr.		Native, endemic	https://powo.science.kew.org/taxon/929582-1
Linaria flava subsp. sardoa	(Sommier) A. Terracc.	Plantaginaceae	Native	Pignatti S., Guarino, R., La Rosa M. (2017-2019) Flora d'Italia, 2nd edition. Edagricole, Edizioni Agricole di New Business Media, Bologna.
Liparis loeselii subsp. loeselii	[NA]	Orchidaceae	Native, missing autonym
Lotus corniculatus subsp. corniculatus	[NA]	Fabaceae	Native, missing autonym
Lysimachia arvensis subsp. arvensis	[NA]	Primulaceae	Native, missing autonym
Mahonia bealei	(Fortune) Carrière	Berberidaceae	Neophyte	Pignatti S., Guarino, R., La Rosa M. (2017-2019) Flora d'Italia, 2nd edition. Edagricole, Edizioni Agricole di New Business Media, Bologna.
Maianthemum trifolium	(L.) Sloboda		Neophyte	https://powo.science.kew.org/taxon/urn:lsid:ipni.org:names:538040-1
Malus baccata	(L.) Borkh.	Rosaceae	Neophyte	WFO (2022)
Malus mandshurica	(Maxim.) Skvortsov		Neophyte	https://powo.science.kew.org/taxon/urn:lsid:ipni.org:names:726330-1
Malus prunifolia	(Willd.) Borkh.	Rosaceae	Neophyte	https://powo.science.kew.org/taxon/urn:lsid:ipni.org:names:726369-1
Malus toringo	(Siebold) Siebold ex de Vriese	Rosaceae	Neophyte	WFO (2022)
Malva alcea var. alcea	[NA]	Malvaceae	Native, missing autonym
Medicago lupulina var. lupulina	[NA]	Fabaceae	Native, missing autonym
Mertensia sibirica	G.Don	Boraginaceae	Neophyte	WFO (2022)
Microcephala lamellata	(Bunge) Pobed.		Neophyte	https://powo.science.kew.org/taxon/urn:lsid:ipni.org:names:232448-1
Minuartia orthophylla	(Beck) Dvořáková	Caryophyllaceae	Native, endemic	WFO (2022)
Mitella pentandra	Hook.		Neophyte	http://www.worldfloraonline.org/taxon/wfo-0001135552
Muscari spreitzenhoferi	(Heldr.) Vierh.	Asparagaceae	Native, online in E+M	Euro+Med (2022)
Myosotis laxa subsp. cespitosa	(Schultz) Nordh.	Boraginaceae	Native, online in E+M	Euro+Med (2022)
Myriophyllum hippuroides	Nutt. ex Torr. & A.Gray	Haloragaceae	Neophyte	WFO (2022)
Nepeta sibirica	L.	Lamiaceae	Neophyte	WFO (2022)
Nothoscordum enterianum	Ravenna	Alliaceae	Neophyte, parent of	WFO (2022)
Nymphaea odorata	Aiton	Nymphaeaceae	Neophyte, parent of	WFO (2022)
Odontarrhena subalpina	(Pall. ex M.Bieb.) D.A.German	Brassicaceae	Native, endemic	http://www.worldfloraonline.org/taxon/wfo-0001341414
Odontites lanceolatus subsp. provincialis	Bolliger	Orobanchaceae	Native, endemic	http://www.worldfloraonline.org/taxon/wfo-0000388609
Onopordum bracteatum subsp. bracteatum	[NA]	Asteraceae	Native, missing autonym
Ophrys flavicans	Vis.	Orchidaceae	Native	WFO (2022)
Ophrys oestrifera subsp. philippei	(Gren.) K.Richt.	Orchidaceae	Native, endemic	WFO (2022)
Ornithogalum dictaeum	Landström		Native, endemic	Strid in Raab-Straube & Raus (ed.), Euro+Med-Checklist Notulae 8 in Willdenowia 47: 295-296 (2017).
Papaver somniferum subsp. somniferum	[NA]	Papaveraceae	Native, missing autonym
Parkinsonia aculeata	L.	Fabaceae	Neophyte	WFO (2022)
Pedicularis capitata	Adams		Neophyte	https://powo.science.kew.org/taxon/urn:lsid:ipni.org:names:806889-1
Pedicularis lanata	Cham. & Schltdl.		Neophyte	https://powo.science.kew.org/taxon/urn:lsid:ipni.org:names:807250-1
Philadelphus microphyllus	A.Gray	Hydrangeaceae	Neophyte, parent of	WFO (2022)
Phygelius capensis	E.Mey. ex Benth.		Neophyte	http://www.worldfloraonline.org/taxon/wfo-0001137451
Physostegia virginiana	Benth.		Neophyte	http://www.worldfloraonline.org/taxon/wfo-0000273071
Picea jezoensis subsp. jezoensis	(Siebold & Zucc.) Carrière		Neophyte	https://powo.science.kew.org/taxon/urn:lsid:ipni.org:names:77172535-1
Picea laxa	(Münchh.) Sarg.		Neophyte	https://powo.science.kew.org/taxon/urn:lsid:ipni.org:names:195881-2
Picea schrenkiana	Fisch. & C.A. Mey.		Neophyte	Picea schrenkiana Fisch. & C.A.Mey. | Plants of the World Online | Kew Science
Pilosella guthnikiana	(Hegetschw. & Heer) Soják	Asteraceae	Native	http://www.worldfloraonline.org/taxon/wfo-0000121006
Pilosella transbotnica	(Norrl.) T.Tyler		Native, endemic	https://powo.science.kew.org/taxon/77175497-1
Pinus densiflora	Siebold & Zucc.		Neophyte	https://powo.science.kew.org/taxon/urn:lsid:ipni.org:names:262894-1
Pinus koraiensis	Siebold & Zucc.		Neophyte	https://powo.science.kew.org/taxon/263037-1
Pinus pumila	(Pall.) Regel		Neophyte	https://powo.science.kew.org/taxon/urn:lsid:ipni.org:names:263243-1
Plantago asiatica	L.		Neophyte	https://powo.science.kew.org/taxon/684897-1
Plantago maritima subsp. maritima	[NA]	Plantaginaceae	Native, missing autonym	https://powo.science.kew.org/taxon/urn:lsid:ipni.org:names:77227455-1
Poa legionensis	(M.Laínz) Fern.Casas & M.Laínz	Poaceae	Native, endemic	http://www.worldfloraonline.org/taxon/wfo-0000892791
Populus yunnanensis	Dode	Salicaceae	Neophyte	WFO (2022)
Potentilla acaulis	L.		Neophyte	https://powo.science.kew.org/taxon/727563-1
Potentilla atrosanguinea	Lodd., G.Lodd. & W.Lodd.	Rosaceae	Neophyte	WFO (2022)
Potentilla fragiformis	D.F.K.Schltdl.		Neophyte	https://powo.science.kew.org/taxon/209192-2
Prangos carinata	Griseb. ex Degen		Native, endemic	https://powo.science.kew.org/taxon/847423-1
Primula auricula subsp. widmerae	(Pax) Li Bing Zhang	Primulaceae	Native, endemic	https://www.kp-buttler.de/florenliste/index.htm
Primula latifolia subsp. cynoglossifolia	(Widmer) L.B. Zhang	Primulaceae	Native, endemic	WFO (2022)
Primula lutea subsp. widmerae	(Pax) Li Bing Zhang	Primulaceae	Native, endemic	WFO (2022)
Primula recubariensis	Prosser & Scortegagna	Primulaceae	Native, endemic	WFO (2022)
Prinsepia sinensis	(Oliv.) Hallier		Neophyte	https://powo.science.kew.org/taxon/urn:lsid:ipni.org:names:77131501-1
Prunus glandulifolia	Rupr.	Rosaceae	Neophyte	https://powo.science.kew.org/taxon/urn:lsid:ipni.org:names:729747-1
Prunus pensylvanica	L.f.	Rosaceae	Neophyte	WFO (2022)
Prunus sibirica	L.	Rosaceae	Neophyte	https://powo.science.kew.org/taxon/urn:lsid:ipni.org:names:324747-2
Psathyrostachys lanuginosa	(Trin.) Nevski		Neophyte	https://powo.science.kew.org/taxon/418808-1
Pulmonaria hirta	L.	Boraginaceae	Native, endemic	Pignatti S., Guarino, R., La Rosa M. (2017-2019) Flora d'Italia, 2nd edition. Edagricole, Edizioni Agricole di New Business Media, Bologna.
Pulmonaria officinalis subsp. officinalis	[NA]	Boraginaceae	Native, missing autonym
Pulsatilla turczaninovii	Krylov & Serg.		Neophyte	https://powo.science.kew.org/taxon/urn:lsid:ipni.org:names:712071-1
Pyrola asarifolia subsp. asarifolia	Michx.		Neophyte	https://powo.science.kew.org/taxon/urn:lsid:ipni.org:names:77224146-1
Pyrola renifolia	Maxim.		Neophyte	https://powo.science.kew.org/taxon/urn:lsid:ipni.org:names:331840-1
Pyrus ussuriensis	Maxim.	Rosaceae	Neophyte	https://powo.science.kew.org/taxon/urn:lsid:ipni.org:names:731337-1
Quercus alba	L.	Fagaceae	Neophyte	https://powo.science.kew.org/taxon/295763-1
Quercus macrocarpa	Michx.	Fagaceae	Neophyte	https://powo.science.kew.org/taxon/30014114-2
Quercus mongolica	Ledeb.	Fagaceae	Neophyte	https://powo.science.kew.org/taxon/urn:lsid:ipni.org:names:296469-1
Quercus velutina	Lam.	Fagaceae	Native, endemic	WFO (2022)
Ranunculus parnassifolius subsp. muniellensis	Bueno Sánchez, Fern.Casado & Fern.Prieto	Ranunculaceae	Native, endemic	http://www.worldfloraonline.org/taxon/wfo-0001366224
Reaumuria fruticosa	Boiss.		Neophyte	https://powo.science.kew.org/taxon/827995-1
Rhamnus davurica	Pall.		Neophyte	https://powo.science.kew.org/taxon/718301-1
Rheum compactum	L.		Neophyte	https://powo.science.kew.org/taxon/696719-1
Rhododendron aureum	Georgi	Ericaceae	Neophyte	https://powo.science.kew.org/taxon/urn:lsid:ipni.org:names:331982-1
Rhododendron canadense	(L.) Torr.	Ericaceae	Neophyte	WFO (2022)
Rhododendron catawbiense	Michx.	Ericaceae	Neophyte	WFO (2022)
Rhododendron dauricum	L.	Ericaceae	Neophyte	https://powo.science.kew.org/taxon/urn:lsid:ipni.org:names:326359-2
Rhododendron maximum	L.	Ericaceae	Neophyte	WFO (2022)
Rhododendron parvifolium	Adams	Ericaceae	Neophyte	https://powo.science.kew.org/taxon/333051-1
Ribes dikuscha	Turcz.		Neophyte	https://powo.science.kew.org/taxon/792658-1
Ribes fragrans	Pall.		Neophyte	https://powo.science.kew.org/taxon/urn:lsid:ipni.org:names:792689-1
Ribes procumbens	Pall.		Neophyte	https://powo.science.kew.org/taxon/792932-1
Ribes triste	Pall.		Neophyte	https://powo.science.kew.org/taxon/urn:lsid:ipni.org:names:221098-2
Rodgersia aesculifolia	Batalin	Saxifragaceae	Neophyte	WFO (2022)
Rosa palustris	Marshall	Rosaceae	Neophyte, parent of	WFO (2022)
Rubus apiculatus	Weihe		Native, online in E+M
Rubus barbeyi	Favrat & Gremli	Rosaceae	Native, endemic	https://plants.jstor.org/stable/10.5555/al.ap.specimen.je00014898
Rubus bracteatus	Boreau		Native, endemic	https://powo.science.kew.org/taxon/735520-1
Rubus fimbriifolius	P. J. Müll. & Wirtg.	Rosaceae	Native, online in E+M
Rubus flaccidifolius	P.J.Müll.	Rosaceae	Native, endemic	WFO (2022)
Rubus histrix	Weihe in Bluff & Fingerhuth	Rosaceae	Native, online in E+M	Euro+Med (2022)
Rubus pilocarpus	Gremli	Rosaceae	Native, online in E+M	Euro+Med (2022)
Rubus prei	Sudre	Rosaceae	Native, endemic	WFO (2022)
Rubus pseudopallidus	Gust.	Rosaceae	Native, endemic	WFO (2022)
Rubus semicarpinifolius	Sudre	Rosaceae	Native	POWO (2022)
Rubus tauricus	Schlechtend. ex Juz.	Rosaceae	Native, endemic	http://www.worldfloraonline.org/taxon/wfo-0001018640
Rubus thyrsiflorus	Weihe		Native, online in E+M
Rubus vallisparsus	Sudre	Rosaceae	Native, online in E+M	Euro+Med (2022)
Rubus vestervicensis	Gust.	Rosaceae	Native, endemic	Dyntaxa (2022)
Rubus widderi	W. Maurer	Rosaceae	Native, endemic	Fischer, Oswald & Adler, Exkursionsfl. Österr. ed. 3: 524. 2008
Rumex longifolius subsp. longifolius	[NA]	Polygonaceae	Native, missing autonym
Salix arbutifolia	Pall		Neophyte	https://powo.science.kew.org/taxon/urn:lsid:ipni.org:names:777074-1
Salix eleagnos subsp. eleagnos	[NA]	Salicaceae	Native, missing autonym
Salsola laricifolia	Litv. ex Drobow		Neophyte	https://powo.science.kew.org/taxon/urn:lsid:ipni.org:names:166904-1
Saussurea alpina	(L.) DC.	Asteraceae	Native, online in E+M	Euro+Med (2022)
Schisandra chinensis	(Turcz.) Baill.		Neophyte	https://powo.science.kew.org/taxon/urn:lsid:ipni.org:names:60456331-2
Scorzonera laciniata subsp. laciniata	[NA]	Asteraceae	Native, missing autonym
Scorzoneroides autumnalis subsp. autumnalis	[NA]	Asteraceae	Native, missing autonym
Sempervivum tectorum subsp. tectorum	[NA]	Crassulaceae	Native, missing autonym
Senecio doronicum subsp. doronicum	[NA]	Asteraceae	Native, missing autonym
Senna obtusifolia	(L.) H.S.Irwin & Barneby		Neophyte	http://www.worldfloraonline.org/taxon/wfo-0000164409
Seriphidium cinum	(O.Berg) Poljakov	Asteraceae	Neophyte	WFO (2022)
Seriphidium oliverianum	(J.Gay ex Besser) K.Bremer & Humphries ex Y.R.Ling	Asteraceae	Neophyte	WFO (2022)
Seriphidium sublessingianum	(B.Keller) Poljakov	Asteraceae	Neophyte	WFO (2022)
Seriphidium terrae-albae	(Krasch.) Poljakov	Asteraceae	Neophyte	WFO (2022)
Silene crispata	Steven	Caryophyllaceae	Native	https://powo.science.kew.org/taxon/urn:lsid:ipni.org:names:157167-1
Silene petrarchae	Ferrarini & Cecchi	Caryphyllaceae	Native, endemic	Pignatti S., Guarino, R., La Rosa M. (2017-2019) Flora d'Italia, 2nd edition. Edagricole, Edizioni Agricole di New Business Media, Bologna.
Silene pichiana	Ferrarini & Cecchi	Caryophyllaceae	Native, endemic	Pignatti S., Guarino, R., La Rosa M. (2017-2019) Flora d'Italia, 2nd edition. Edagricole, Edizioni Agricole di New Business Media, Bologna.
Silene roemeri subsp. staminea	(Bertol.) Nyman	Caryophyllaceae	Native, endemic	Pignatti S., Guarino, R., La Rosa M. (2017-2019) Flora d'Italia, 2nd edition. Edagricole, Edizioni Agricole di New Business Media, Bologna.
Soldanella sacra	A. Bellino & L. Bellino	Primulaceae	Native, endemic	Pignatti S., Guarino, R., La Rosa M. (2017-2019) Flora d'Italia, 2nd edition. Edagricole, Edizioni Agricole di New Business Media, Bologna.
Sorbaria kirilowii	(Regel) Maxim.	Rosaceae	Neophyte	WFO (2022)
Sorbus sambucifolia	(Cham. & Schltdl.) M. Roem.	Rosaceae	Neophyte	https://powo.science.kew.org/taxon/30251497-2
Sorbus tianschanica	Rupr.	Rosaceae	Neophyte	https://powo.science.kew.org/taxon/urn:lsid:ipni.org:names:742013-1
Spergula tangerina	(P.Monnier) G.López	Caryophyllaceae	Neophyte	https://powo.science.kew.org/taxon/urn:lsid:ipni.org:names:77127761-1
Spiraea cantoniensis	Lour.	Rosaceae	Neophyte, parent of	WFO (2022)
Spiraea thunbergii	Siebold ex Blume		Neophyte	http://www.worldfloraonline.org/taxon/wfo-0000985820
Stephanandra incisa	Zabel	Rosaceae	Neophyte	http://www.worldfloraonline.org/taxon/wfo-0001008071
Stipa richteriana	Kar. & Kir.		Neophyte	https://powo.science.kew.org/taxon/423707-1
Streptoloma desertorum	Bunge		Neophyte	https://powo.science.kew.org/taxon/290198-1
Strigosella brevipes	(Bunge) Botsch.		Neophyte	https://powo.science.kew.org/taxon/urn:lsid:ipni.org:names:290202-1
Symphoricarpos microphyllus	Kunth	Caprifoliaceae	Neophyte, parent of	WFO (2022)
Symphoricarpos orbiculatus	Moench	Caprifoliaceae	Neophyte, parent of	https://powo.science.kew.org/taxon/149465-1
Syneilesis aconitifolia	(Bunge) Maxim.	Asteraceae	Neophyte	http://www.worldfloraonline.org/taxon/wfo-0000010912
Syringa reticulata subsp. amurensis	(Rupr.) P.S.Green & M.C.Chang		Neophyte	https://powo.science.kew.org/taxon/urn:lsid:ipni.org:names:986407-1
Syringa villosa	Vahl.	Oleaceae	Neophyte, parent of	WFO (2022)
Tanacetum corymbosum subsp. corymbosum	[NA]	Asteraceae	Native, missing autonym
Taxus cuspidata	Siebold & Zucc.	Taxaceae	Neophyte, parent of	WFO (2022)
Thalictrum venulosum	Trel.	Ranunculaceae	Neophyte	WFO (2022)
Thermopsis montana	Nutt. ex Torr. & A.Gray	Fabaceae	Neophyte	WFO (2022)
Thesium kerneranum	Simonk.	Thesiaceae	Neophyte	Flora Europaea (1964)
Thymus picentinus	(Lacaita) Bartolucci	Lamiaceae	Native, endemic	WFO (2022)
Tilia amurensis	Rupr.		Neophyte	https://powo.science.kew.org/taxon/urn:lsid:ipni.org:names:77226503-1
Tilia mandshurica	Rupr. & Maxim.		Neophyte	https://powo.science.kew.org/taxon/urn:lsid:ipni.org:names:835433-1
Tilia platyphyllos subsp. platyphyllos	[NA]	Malvaceae	Native, missing autonym
Toona sinensis	(Juss.) M.Roem.	Meliaceae	Neophyte	WFO (2022)
Tragopogon dubius subsp. dubius	[NA]	Asteraceae	Native, missing autonym
Trifolium phitosianum	N.Böhling, Greuter & Raus	Fabaceae	Native, endemic	WFO (2022)
Trifolium praetermissum	Greuter, Pleger & Raus	Fabaceae	Native, endemic	WFO (2022)
Trifolium pratense var. nivale	W.D.J.Koch	Fabaceae	Native
Tripleurospermum ambiguum	(Ledeb.) Franch. & Sav.		Neophyte	https://powo.science.kew.org/taxon/urn:lsid:ipni.org:names:77181257-1
Trollius ledebourii	Rchb.	Ranunculaceae	Neophyte	https://powo.science.kew.org/taxon/715116-1
Trollius sibiricus	Schipcz.	Ranunculaceae	Neophyte	https://powo.science.kew.org/taxon/urn:lsid:ipni.org:names:715149-1
Tulipa greigii	Regel		Neophyte	https://powo.science.kew.org/taxon/urn:lsid:ipni.org:names:542931-1
Ulex breoganii	(Castrov. & Valdes Berm.) Castrov. & Valdes Berm.	Fabaceae	Native, endemic	WFO (2022)
Ulmus laciniata	(Herder) Mayr ex Schwapp.		Neophyte	https://powo.science.kew.org/taxon/urn:lsid:ipni.org:names:837147-1
Vaccinium ovalifolium	Sm.		Neophyte	https://powo.science.kew.org/taxon/urn:lsid:ipni.org:names:317273-2
Valeriana dubia	Bunge		Neophyte	https://powo.science.kew.org/taxon/urn:lsid:ipni.org:names:859756-1
Veronica incana subsp. incana	[NA]	Plantaginaceae	Native, missing autonym
Veronica vendettadeae	Albach	Plantaginaceae	Neophyte	WFO (2022)
Viburnum farreri	Stearn	Viburnaceae	Neophyte	http://www.worldfloraonline.org/taxon/wfo-0001291055
Vicia cusnae	Foggi & Ricceri	Fabaceae	Native, endemic	Pignatti S., Guarino, R., La Rosa M. (2017-2019) Flora d'Italia, 2nd edition. Edagricole, Edizioni Agricole di New Business Media, Bologna.
Vicia giacominiana	Segelb.	Fabaceae	Native, endemic	WFO (2022)
Vicia tenuifolia subsp. tenuifolia	[NA]	Fabaceae	Native, missing autonym
Vinca erecta	Regel & Schmalh.		Neophyte	https://powo.science.kew.org/taxon/82686-1
Vincetoxicum rehmannii	Boiss.		Native, endemic	https://powo.science.kew.org/taxon/102955-1
Viola isopetala	Juz.		Neophyte	https://powo.science.kew.org/taxon/urn:lsid:ipni.org:names:868399-1
Viola merxmuelleri	Erben	Fabaceae	Native, endemic	WFO (2022)
Viola suavis subsp. suavis	[NA]	Violaceae	Native, missing autonym
Viola uniflora	L.	Violaceae	Neophyte	https://powo.science.kew.org/taxon/urn:lsid:ipni.org:names:869463-1
Weigela middendorffiana	(Carrière) K. Koch		Neophyte	https://powo.science.kew.org/taxon/urn:lsid:ipni.org:names:60463215-2

## Sheet: Table S3.2. Hybrid definitions
Taxon.accepted	Authority.accepted	Rank.accepted	Parent.1.accepted	Parent.2.accepted	Parent.3.accepted	Source for name
Abies alba x nordmanniana	[NA]	hyb.-sp. (formula)	Abies alba	Abies nordmanniana		France
Acer x coriaceum	Bosc ex Tausch	hyb.-sp.	Acer monspessulanum	Acer pseudoplatanus		https://www.gbif.org/species/3768095
Acer x hybridum	Spach	hyb.-sp.	Acer opalus	Acer pseudoplatanus		https://www.gbif.org/species/7495841
Acer x peronai	Schwer.	hyb.-sp.	Acer campestre	Acer pseudoplatanus		https://www.ipni.org/n/56776-1
Achillea x nyaradyana	Prodan	hyb.-sp.	Achillea coarctata	Achillea leptophylla		WFO (2022)
Achillea x javorkae	Prodan	hyb.-sp.	Achillea clypeolata	Achillea setacea		https://powo.science.kew.org/taxon/174047-1
Aconitum variegatum nothosubsp. podobnikianum	Mücher	nothosubsp.	Aconitum variegatum subsp. nasutum	Aconitum variegatum subsp. variegatum		https://www.worldplants.de/world-plants-complete-list/complete-plant-list#plantUid-124363
Aconitum x gayeri	Starmuhl	hyb.-sp.	Aconitum degenii	Aconitum lasiocarpum		WFO (2022)
Aconitum x schneebergense	Gáyer	hyb.-sp.	Aconitum napellus	Aconitum variegatum		Müller et al. (2021)
Aconogonon x fennicum	Reiersen	hyb.-sp.	Aconogon alpinum	Aconogonon weyrichii		Dyntaxa (2022)
Adonis x hybrida	G.Wolff ex Simonk.	hyb.-sp.	Adonis vernalis	Adonis volgensis		Bulletin de la Société botanique de France (1876)
Aesculus x carnea	Hayne	hyb.-sp.	Aesculus hippocastanum	Aesculus pavia		Müller et al. (2021)
Agrimonia x wirtgenii	Asch.et Graebn.	hyb.-sp.	Agrimonia eupatoria	Agrimonia procera		Müller et al. (2021)
Alchemilla glacialis x pentaphyllea	[NA]	hyb.-sp. (formula)	Alchemilla glacialis	Alchemilla pentaphyllea		France
Allium ampeloprasum x commutatum	[NA]	hyb.-sp. (formula)	Allium ampeloprasum	Allium commutatum		Julve (2022)
Alnus incana subsp. incana x viridis	[NA]	nothosubsp. (formula)	Alnus incana subsp. incana	Alnus viridis
Alnus x pubescens	Tausch	hyb.-sp.	Alnus glutinosa	Alnus incana		Müller et al. (2021)
Anacamptis coriophora x palustris	[NA]	hyb.-sp. (formula)	Anacamptis coriophora	Anacamptis palustris		France
Anacamptis laxiflora x picta	[NA]	hyb.-sp. (formula)	Anacamptis laxiflora	Anacamptis picta		France
Anacamptis morio x papilionacea	[NA]	hyb.-sp. (formula)	Anacamptis morio	Anacamptis papilionacea		France
Anacamptis x albertii	(A.Camus) B.Bock	hyb.-sp.	Anacamptis champagneuxii	Anacamptis picta		https://www.ipni.org/n/77118687-1
Anacamptis x genevensis	(Chenev.) H.Kretzschmar, Eccarius & H.Dietr.	hyb.-sp.	Anacamptis morio	Anacamptis palustris		https://www.ipni.org/n/77078879-1
Anacamptis x gennarii	(Rchb.f.) H.Kretzschmar, Eccarius & H.Dietr.	hyb.-sp.	Anacamptis papilionacea	Anacamptis picta		https://www.ipni.org/n/77078874-1
Anacamptis x lloydiana	(Rouy) H.Kretzschmar, Eccarius & H.Dietr.	hyb.-sp.	Anacamptis laxiflora	Anacamptis palustris		https://powo.science.kew.org/taxon/77078871-1
Anacamptis x murgiana	(Medagli, D'Emerico, Ruggiero & Bianco) F.M.Vázquez	hyb.-sp.	Anacamptis collina	Anacamptis morio		https://www.ipni.org/n/77096568-1
Anacamptis x olida	(Bréb.) H.Kretzschmar, Eccarius & H.Dietr.	hyb.-sp.	Anacamptis coriophora	Anacamptis morio		https://www.ipni.org/n/77078858-1
Anacamptis x semisaccata	(E.G.Camus) H.Kretzschmar, Eccarius & H.Dietr.	hyb.-sp.	Anacamptis champagneuxii	Anacamptis collina		https://www.ipni.org/n/77078851-1
Anacamptis x simorrensis	(E.G.Camus) H.Kretzschmar, Eccarius & H.Dietr.	hyb.-sp.	Anacamptis coriophora	Anacamptis pyramidalis		https://www.ipni.org/n/77078867-1
Anacamptis x vanlookenii	(C.Bernard & G.Fabre) H.Kretzschmar, Eccarius & H.Dietr.	hyb.-sp.	Anacamptis papilionacea	Anacamptis pyramidalis		https://www.ipni.org/n/77078882-1
Anemone x lipsiensis	Beck	hyb.-sp.	Anemone nemorosa	Anemone ranunculoides		Dyntaxa (2022)
Anisantha diandra × madritensis	[NA]	hyb.-sp. (formula)	Anisantha diandra	Anisantha madritensis		France
Anisantha madritensis × sterilis	[NA]	hyb.-sp. (formula)	Anisantha madritensis	Anisantha sterilis		France
Anisantha x granatensis	(A.Camus) Valdés	hyb.-sp.	Anisantha madritensis	Anisantha rubens		https://www.ipni.org/n/77094216-1
Anisantha x guetrotii	(A.Camus) B.Bock	hyb.-sp.	Anisantha sterilis	Anisantha tectorum		https://www.tela-botanica.org/bdtfx-nn-119497-nomenclature
Arbutus x andrachnoides	Link	hyb.-sp.	Arbutus andrachne	Arbutus unedo		https://www.ipni.org/n/326436-1
Arctium x ambiguum	Beck ex Nyman	hyb.-sp.	Arctium lappa	Arctium tomentosum		Müller et al. (2021)
Arctium x nothum	(Ruhmer) J.Weiss	hyb.-sp.	Arctium lappa	Arctium minus		Müller et al. (2021)
Asplenium x alternifolium	Wulfen	hyb.-sp.	Asplenium septentrionale	Asplenium trichomanes		Müller et al. (2021)
Asplenium x alternifolium nothosubsp. heufleri	(Reichardt) Aizpuru, Catalán & Salvo	nothosubsp.	Asplenium septentrionale	Asplenium trichomanes subsp.quadrivalens		Müller et al. (2021)
Asplenium x ticinense	D.E.Mey.	hyb.-sp.	Asplenium adiantum-nigrum	Asplenium onopteris		WFO (2022)
Athyrium x reichsteinii	Schneller & Rasbach	hyb.-sp.	Athyrium distentifolium	Athyrium filix-femina		Müller et al. (2021)
Atriplex glabriuscula x prostrata	[NA]	hyb.-sp. (formula)	Atriplex glabriuscula	Atriplex prostrata		France
Betula x aurata	Borkh.	hyb.-sp.	Betula pendula	Betula pubescens		https://powo.science.kew.org/taxon/urn:lsid:ipni.org:names:295045-1
Betula x bottnica	Mela	hyb.-sp.	Betula nana	Betula pendula		https://powo.science.kew.org/taxon/77176758-1
Betula x intermedia	(Hartm.) E.Thomas ex Gaudin	hyb.-sp.	Betula nana	Betula pubescens		Müller et al. (2021)
Bidens x madiotii	H.J.Coste ex P.Fourn.	hyb.-sp.	Bidens connata	Bidens tripartita		https://powo.science.kew.org/taxon/185040-1
Bidens x polakii	Velen.	hyb.-sp.	Bidens radiata	Bidens tripartita		Müller et al. (2021)
Bromus x commutato-japonicus	Prod. et Nyár.	hyb.-sp.	Bromus commutatus	Bromus japonicus		WFO (2022)
Calamagrostis x bihariensis	Simonk.	hyb.-sp.	Calamagrostis epigejos	Calamagrostis varia		Müller et al. (2021)
Calamagrostis x hartmanniana	Fries.	hyb.-sp.	Calamagrostis arundinace	Calamagrostis canescens		Müller et al. (2021)
Calamagrostis x baltica	(Flüggé ex Schrad.) Trin.	hyb.-sp.	Calamagrostis arenaria	Calamagrostis epigejos		https://powo.science.kew.org/taxon/394326-1
Calamagrostis x bihariensis	Simonk.	hyb.-sp.	Calamagrostis epigejos	Calamagrostis varia		Müller et al. (2021)
Callitriche x vigens	K. Martinsson	hyb.-sp.	Callitriche cophocarpa	Callitriche platycarpa		Dyntaxa (2022)
Calystegia x lucana	(Ten.) G.Don	hyb.-sp.	Calystegia sepium	Calystegia silvatica		Müller et al. (2021)
Cardamine x digenea	(Gremli) O.E.Schulz	hyb.-sp.	Cardamine heptaphylla	Cardamine bulbifera		https://powo.science.kew.org/taxon/280273-1
Cardamine x insueta	K.Urbanska-Worytkiewicz	hyb.-sp.	Cardamine amara	Cardamine rivularis		https://powo.science.kew.org/taxon/280399-1
Carduus litigiosus x nigrescens	[NA]	hyb.-sp. (formula)	Carduus litigiosus	Carduus nigrescens		France
Carduus x brunneri	Döll	hyb.-sp.	Carduus defloratus	Carduus nutans		Müller et al. (2021)
Carduus x grenieri	Sch.Bip. ex Nyman	hyb.-sp.	Carduus nutans	Carduus personata		Müller et al. (2021)
Carduus x lesurinus	Rouy	hyb.-sp.	Carduus nutans	Carduus nigrescens		https://powo.science.kew.org/taxon/188777-1
Carduus x moritzii	Brügger	hyb.-sp.	Carduus crispus	Carduus defloratus		https://powo.science.kew.org/taxon/188850-1
Carduus x naegelii	Brügger	hyb.-sp.	Carduus defloratus	Carduus personata		https://powo.science.kew.org/taxon/188862-1
Carduus x puechii	H.J.Coste	hyb.-sp.	Carduus nutans	Carduus nigrescens subsp. nigrescens		https://powo.science.kew.org/taxon/urn:lsid:ipni.org:names:77222109-1
Carduus x sepincola	Hausskn.	hyb.-sp.	Carduus crispus	Carduus personata		https://powo.science.kew.org/taxon/189053-1
Carduus x polyacanthos	Schleich.	hyb.-sp.	Carduus crispus	Carduus nutans		Müller et al. (2021)
Carex distans x flacca	[NA]	hyb.-sp. (formula)	Carex distans	Carex flacca		France
Carex x alsatica	Zahn	hyb.-sp.	Carex flava	Carex demissa		Müller et al. (2021)
Carex x beckmanniana	Figert	hyb.-sp.	Carex riparia	Carex rostrata		Müller et al. (2021)
Carex x costei	Rouy	hyb.-sp.	Carex distans	Carex mairei		https://powo.science.kew.org/taxon/299284-1
Carex x danielis	H.Lév.	hyb.-sp.	Carex flacca	Carex tomentosa		https://powo.science.kew.org/taxon/299382-1
Carex x figertii	Asch. & Graebn.	hyb.-sp.	Carex davalliana	Carex dioica		Müller et al. (2021)
Carex x fulva	Gooden.	hyb.-sp.	Carex hostiana	Carex demissa		Müller et al. (2021)
Carex x fussii	Simonk.	hyb.-sp.	Carex echinata	Carex paniculata		Müller et al. (2021)
Carex x grahamii	Boott.	hyb.-sp.	Carex saxatilis	Carex vesicaria		Dyntaxa (2022)
Carex x grossii	Fiek	hyb.-sp.	Carex hirta	Carex vesicaria		WFO (2022)
Carex x involuta	(Bab.) Syme	hyb.-sp.	Carex rostrata	Carex vesicaria		Müller et al. (2021)
Carex x limnogena	Appel	hyb.-sp.	Carex appropinquata	Carex diandra		Müller et al. (2021)
Carex x ludibunda	J.Gay	hyb.-sp.	Carex canescens	Carex paniculata		Müller et al. (2021)
Carex x microstyla	J.Gay ex Gaudin	hyb.-sp.	Carex brunnescens	Carex foetida		Julve (2022)
Carex x pauliana	Schultz	hyb.-sp.	Carex hostiana	Carex oederi		https://powo.science.kew.org/taxon/77177324-1
Carex x pieperiana	Junge	hyb.-sp.	Carex flava	Carex lepidocarpa		Müller et al. (2021)
Carex x prolixa	Fr.	hyb.-sp.	Carex acuta	Carex elata		Müller et al. (2021)
Carex x rotae	De Not.	hyb.-sp.	Carex appropinquata	Carex paniculata		Müller et al. (2021)
Carex x saamica	T.M.Pedersen & Elven	hyb.-sp.	Carex rostrata	Carex rotundata		Dyntaxa (2022)
Carex x turfosa	Fr.	hyb.-sp.	Carex elata	Carex nigra		Müller et al. (2021)
Carex x xanthocarpa	Degl. ex Loisel.	hyb.-sp.	Carex flava	Carex hostiana		Müller et al. (2021)
Carex x. laggeri	Wimm.	hyb.-sp.	Carex echinata	Carex foetida		Julve (2022)
Centaurea x moncktonii	Thuill.	hyb.-sp.	Carex jacea	Carex nigra		Dyntaxa (2022)
Centaurea x pouzinii	DC.	hyb.-sp.	Centaurea aspera	Centaurea calcitrapa		Julve (2022)
Centaurea x silvatica	Pourr.	hyb.-sp.	Centaurea collina subsp. collina	Centaurea scabiosa subsp. scabiosa		https://www.tela-botanica.org/bdtfx-nn-15489-synthese
Centaurium x aschersonianum	(Seemen) Hegi	hyb.-sp.	Centaurium erythraea	Centaurium pulchellum		Müller et al. (2021)
Cerastium x microcapsum	Arv.-Touv.	hyb.-sp.	Cerastium alpinum	Cerastium arvense		https://www.tela-botanica.org/bdtfx-nn-15924-synthese
Chaenomeles x superba	(Frahm) Rehder	hyb.-sp.	Chaenomeles japonica	Chaenomeles speciosa		Dyntaxa (2022)
Chamaecytisus x virescens	(Kovács ex Neilr.) Dostál	hyb.-sp.	Chamaecytisus austriacus	Chamaecytisus supinus		WFO (2022)
Circaea x intermedia	Ehrh.	hyb.-sp.	Circaea alpina	Circaea lutetiana		Müller et al. (2021)
Cirsium x alpestre	Nägeli	hyb.-sp.	Cirsium acaulon	Cirsium heterophyllum		Müller et al. (2021)
Cirsium x arisitense	H.J.Coste & Soulié	hyb.-sp.	Cirsium monspessulanum	Cirsium tuberosum		https://www.tela-botanica.org/bdtfx-nn-17467-synthese
Cirsium x bipontinum	(F.W.Schultz) F.W.Schultz	hyb.-sp.	Cirsium oleraceum	Cirsium vulgare		Müller et al. (2021)
Cirsium x candolleanum	Nägeli	hyb.-sp.	Cirsium erisithales	Cirsium oleraceum		https://powo.science.kew.org/taxon/195137-1
Cirsium x celakovskianum	Knaf	hyb.-sp.	Cirsium arvense	Cirsium palustre		Müller et al. (2021)
Cirsium x erucagineum	DC.	hyb.-sp.	Cirsium oleraceum	Cirsium rivulare		Müller et al. (2021)
Cirsium x fissibracteatum	Peterm.	hyb.-sp.	Cirsium acaulon	Cirsium spinosissimum		Müller et al. (2021)
Cirsium x gerhardtii	Sch.Bip.	hyb.-sp.	Cirsium eriophorum	Cirsium vulgare		Müller et al. (2021)
Cirsium x heerianum	Nägeli	hyb.-sp.	Cirsium acaulon	Cirsium rivulare		Müller et al. (2021)
Cirsium x hybridum	Koch ex DC.	hyb.-sp.	Cirsium oleraceum	Cirsium palustre		Müller et al. (2021)
Cirsium x inerme	Rchb.	hyb.-sp.	Cirsium oleraceum	Cirsium tuberosum		https://www.tela-botanica.org/bdtfx-nn-17658-synthese
Cirsium x medium	All.	hyb.-sp.	Cirsium acaulon	Cirsium tuberosum		Müller et al. (2021)
Cirsium x ochroleucum	All.	hyb.-sp.	Cirsium erisithales	Cirsium palustre		https://powo.science.kew.org/taxon/195760-1
Cirsium x praealpinum	Beck	hyb.-sp.	Cirsium erisithales	Cirsium rivulare		https://powo.science.kew.org/taxon/77222260-1
Cirsium x purpureum	All.	hyb.-sp.	Cirsium heterophyllum	Cirsium spinosissimum		Müller et al. (2021)
Cirsium x rigens	(Aiton) Wallr.	hyb.-sp.	Cirsium acaulon	Cirsium oleraceum		Müller et al. (2021)
Cirsium x semidecurrens	Richt.	hyb.-sp.	Cirsium palustre	Cirsium tuberosum		Müller et al. (2021)
Cirsium x spinifolium	Beck	hyb.-sp.	Cirsium palustre	Cirsium spinosissimum		Müller et al. (2021)
Cirsium x subalpinum	Gaudin	hyb.-sp.	Cirsium palustre	Cirsium rivulare		Müller et al. (2021)
Cirsium x subspinuligerum	Peterm.	hyb.-sp.	Cirsium palustre	Cirsium vulgare		Müller et al. (2021)
Cirsium x thomasii	Nägeli	hyb.-sp.	Cirsium oleraceum	Cirsium spinosissimum		Müller et al. (2021)
Cirsium x tiroliense	Treuinf.	hyb.-sp.	Cirsium acaulon	Cirsium erisithales		Julve (2009)
Cirsium x csepeliense	Borbás	hyb.-sp.	Cirsium arvense	Cirsium vulgare		Müller et al. (2021)
Cistus x revolii nothosubsp. revolii	H.J.Coste & Soulié	nothosubsp.	Cistus salviifolius	Cistus lasianthus subsp. alyssoides		Julve (2009)
Citrus x aurantium	L.	hyb.-sp.	Citrus maxima	Citrus reticulata		https://en.wikipedia.org/wiki/Citrus_taxonomy
Citrus x limon	(L.) Osbeck.	hyb.-sp.	Citrus x aurantium	Citrus medica		https://en.wikipedia.org/wiki/Citrus_taxonomy
Corydalis × hausmannii	Klebelsberg	hyb.-sp.	Corydalis intermedia	Corydalis solida
Corydalis x budensis	Vajda	hyb.-sp.	Corydalis cava	Corydalis solida		Müller et al. (2021)
Corydalis x campylochila	Teyber	hyb.-sp.	Corydalis intermedia	Corydalis solida		Müller et al. (2021)
Cotoneaster x intermedius	(Lecoq & Lamotte) H.J.Coste	hyb.-sp.	Cotoneaster nebrodensis	Cotoneaster pyrenaicus		https://powo.science.kew.org/taxon/urn:lsid:ipni.org:names:722539-1
Crataegus x gillotii	(Beck) T.A.Dickinson & E.Y.Y.Lo	hyb.-sp.	Crataegus germanica	Crataegus monogyna		https://powo.science.kew.org/taxon/77085053-1
Crataegus x macrocarpa	Hegetschw.	hyb.-sp.	Crataegus laevigata	Crataegus rhipidophylla		Dyntaxa (2022)
Crataegus x media	Bechst.	hyb.-sp.	Crataegus laevigata	Crataegus monogyna		Dyntaxa (2022)
Crataegus x subsphaerica	Gand.	hyb.-sp.	Crataegus monogyna	Crataegus rhipidophylla		Müller et al. (2021)
Crocosmia x crocosmiiflora	(Lemoine ex Morren) N.E. Br.	hyb.-sp.	Crocosmia aurea	Crocosmia pottsii		WFO (2022)
Crocus x hybridus	Petrovic	hyb.-sp.	Crocus biflorus	Crocus chrysanthus		Dyntaxa (2022)
Crocus x stellaris	Haw.	hyb.-sp.	Crocus angustifolius	Crocus flavus		Dyntaxa (2022)
Cupressus x leylandii	A.B.Jacks. & Dallim.	hyb.-sp.	Cupressus macrocarpa	Cupressus nootkatensis		WFO (2022)
Cytisus x versicolor	(G. Kirchn.) Dippel	hyb.-sp.	Cytisus purpureus	Cytisus triflorus		Dyntaxa (2022)
Dactylorhiza angustata x fuchsii	[NA]	hyb.-sp. (formula)	Dactylorhiza angustata	Dactylorhiza fuchsii		France
Dactylorhiza x altobracensis	(H.J.Coste) Soó	hyb.-sp.	Dactylorhiza maculata	Dactylorhiza sambucina		Müller et al. (2021)
Dactylorhiza x aschersoniana	(Hausskn.) Borsos & Soó	hyb.-sp.	Dactylorhiza incarnata	Dactylorhiza majalis		Müller et al. (2021)
Dactylorhiza x braunii	(Halácsy) Borsos & Soó	hyb.-sp.	Dactylorhiza majalis	Dactylorhiza fuchsii		Müller et al. (2021)
Dactylorhiza x carnea	(E.G.Camus ex Fourcy) Soó	hyb.-sp.	Dactylorhiza incarnata	Dactylorhiza maculata		Müller et al. (2021)
Dactylorhiza x delamainii	(G.Keller) Soó	hyb.-sp.	Dactylorhiza elata	Dactylorhiza maculata		https://powo.science.kew.org/taxon/626592-1
Dactylorhiza x dufftiana	(M.Schulze) Soó	hyb.-sp.	Dactylorhiza lapponica	Dactylorhiza majalis		https://powo.science.kew.org/taxon/626596-1
Dactylorhiza x grandis	(Druce) P.F.Hunt	hyb.-sp.	Dactylorhiza fuchsii	Dactylorhiza praetermissa		https://powo.science.kew.org/taxon/626612-1
Dactylorhiza x guilhotii	(E.G.Camus, Bergon & A.Camus) B.Bock	hyb.-sp.	Dactylorhiza incarnata	Dactylorhiza viridis		https://powo.science.kew.org/taxon/77118702-1
Dactylorhiza x guillaumeae	C.Bernard	hyb.-sp.	Dactylorhiza incarnata	Dactylorhiza sambucina		https://powo.science.kew.org/taxon/901861-1
Dactylorhiza x hallii	(Druce) Soó	hyb.-sp.	Dactylorhiza maculata	Dactylorhiza praetermissa		https://powo.science.kew.org/taxon/626613-1
Dactylorhiza x jenensis	(Brand) Soó	hyb.-sp.	Dactylorhiza maculata	Dactylorhiza lapponica		https://powo.science.kew.org/taxon/626625-1
Dactylorhiza x kerneriorum	(Soó) Soó	hyb.-sp.	Dactylorhiza fuchsii	Dactylorhiza incarnata		Müller et al. (2021)
Dactylorhiza x paridaeniana	Kreutz	hyb.-sp.	Dactylorhiza elata	Dactylorhiza praetermissa		https://www.ipni.org/n/urn:lsid:ipni.org:names:940402-1
Dactylorhiza x stenostachys	(J.Murray) Rauschert	hyb.-sp.	Dactylorhiza incarnata	Dactylorhiza traunsteineri		Müller et al. (2021)
Dactylorhiza x transiens	(Druce) Soó	hyb.-sp.	Dactylorhiza maculata	Dactylorhiza fuchsii		Müller et al. (2021)
Dactylorhiza x aschersoniana nothosubsp. predaensis	(Gsell) Oddone	nothosubsp.	Dactylorhiza incarnata subsp. cruenta	Dactylorhiza majalis		https://powo.science.kew.org/taxon/626657-1
Dactylorhiza x claudiopolitana nothosubsp. maculatiformis	(Rouy) Oddone	nothosubsp.	Dactylorhiza incarnata	Dactylorhiza maculata subsp. maculata		https://powo.science.kew.org/taxon/77159467-1
Dactylorhiza x conigera	(Norman) B.Bock	hyb.-sp.	Dactylorhiza maculata	Dactylorhiza viridis		https://powo.science.kew.org/taxon/77118699-1
Dactylorhiza x senayi nothosubsp. vermeuleniana	(Soó) Oddone	nothosubsp.	Dactylorhiza majalis subsp. majalis	Dactylorhiza maculata subsp. maculata		https://powo.science.kew.org/taxon/626700-1
Delphinium x belladonna	(Kelway) Bergmans	hyb.-sp.	Delphinium elatum	Delphinium grandiflorum		Dyntaxa (2022)
Dianthus x laucheanus	Bolle	hyb.-sp.	Dianthus barbatus	Dianthus deltoides		Müller et al. (2021)
Dianthus x loretii	Rouy & Foucaud	hyb.-sp.	Dianthus deltoides	Dianthus seguieri		Julve (2009)
Dianthus x ponsii	Rouy & Foucaud	hyb.-sp.	Dianthus hyssopifolius	Dianthus pavonius		Julve (2009)
Digitalis x media	P.Fourn.	hyb.-sp.	Digitalis grandiflora	Digitalis lutea		Müller et al. (2021)
Doronicum x pardalanchoides	Bornm. & W.Koch	hyb.-sp.	Doronicum austriacum	Doronicum pardalianches		Julve (2009)
Drosera x beleziana	E.G.Camus	hyb.-sp.	Drosera intermedia	Drosera rotundifolia		Julve (2009)
Drosera x obovata	Mert. & W.D.J.Koch	hyb.-sp.	Drosera anglica	Drosera rotundifolia		Müller et al. (2021)
Dryopteris x ambroseae	Fraser-Jenk. & Jermy	hyb.-sp.	Dryopteris dilatata	Dryopteris expansa		Müller et al. (2021)
Dryopteris x complexa	Fraser-Jenk.	hyb.-sp.	Dryopteris affinis	Dryopteris filix-mas		Müller et al. (2021)
Dryopteris x complexa nothosubsp. complexa	Fraser-Jenk.	nothosubsp.	Dryopteris affinis subsp. affinis	Dryopteris filix-mas		Müller et al. (2021)
Dryopteris x critica	Fraser-Jenk.	hyb.-sp.	Dryopteris borreri	Dryopteris filix-mas		Müller et al. (2021)
Dryopteris x deweveri	(Jansen) Jansen et Wachter	hyb.-sp.	Dryopteris carthusiana	Dryopteris dilatata		Müller et al. (2021)
Dryopteris x gomerica	Gibby & Widén	hyb.-sp.	Dryopteris aemula	Dryopteris guanchica		https://powo.science.kew.org/taxon/17507460-1
Dryopteris x uliginosa	(A.Braun ex Döll) Kuntze ex Druce	hyb.-sp.	Dryopteris carthusiana	Dryopteris cristata		Müller et al. (2021)
Elytrigia campestris x intermedia	[NA]	hyb.-sp. (formula)	Elytrigia campestris	Elytrigia intermedia		France
Elytrigia x acuta	(DC.) Tzevelev	hyb.-sp.	Elytrigia atherica	Elytrigia juncea		Stace et al. (2015): Hybrid flora of the British Isles
Elytrigia x acuta nothosubsp. obtusiuscula	(Lange) Kerguélen	nothosubsp.	Elytrigia atherica	Elytrigia juncea subsp. boreoatlantica		Stace et al. (2015): Hybrid flora of the British Isles
Elytrigia x drucei	Stace	hyb.-sp.	Elytrigia x acuta	Elytrigia repens		Julve (2022)
Elytrigia x duvalii	(Loret & Barrandon) B.Bock	hyb.-sp.	Elytrigia x acuta	Elytrigia juncea		Julve (2022)
Elytrigia x laxa	(Fr.) Kerguélen	hyb.-sp.	Elytrigia juncea	Elytrigia repens		Müller et al. (2021)
Elytrigia x tallonii	(Simonet) B.Bock	hyb.-sp.	Elytrigia campestris	Elytrigia repens		Julve (2022)
Epilobium ciliatum x tetragonum	[NA]	hyb.-sp. (formula)	Epilobium ciliatum	Epilobium tetragonum		France
Epilobium x abortivum	Hausskn.	hyb.-sp.	Epilobium lanceolatum	Epilobium roseum		Müller et al. (2021)
Epilobium x borbasianum	Hausskn.	hyb.-sp.	Epilobium roseum	Epilobium tetragonum		Müller et al. (2021)
Epilobium x borderianum	Hausskn.	hyb.-sp.	Epilobium collinum	Epilobium duriaei		Julve (2009)
Epilobium x brevipilum	Hausskn.	hyb.-sp.	Epilobium hirsutum	Epilobium tetragonum		Müller et al. (2021)
Epilobium x celakovskyanum	Hausskn.	hyb.-sp.	Epilobium anagallidifolium	Epilobium nutans		Müller et al. (2021)
Epilobium x freynii	Celak.	hyb.-sp.	Epilobium alpestre	Epilobium montanum		Müller et al. (2021)
Epilobium x interjectum	Smejkal	hyb.-sp.	Epilobium ciliatum	Epilobium montanum		Müller et al. (2021)
Epilobium x intersitum	Hausskn.	hyb.-sp.	Epilobium duriaei	Epilobium montanum		https://powo.science.kew.org/taxon/611954-1
Epilobium x limosum	Schur	hyb.-sp.	Epilobium montanum	Epilobium parviflorum		Müller et al. (2021)
Epilobium x persicinum	Rchb.	hyb.-sp.	Epilobium parviflorum	Epilobium roseum		Müller et al. (2021)
Epilobium x purpureum	Fr.	hyb.-sp.	Epilobium palustre	Epilobium roseum		Müller et al. (2021)
Epilobium x rivulare	Wahlenb.	hyb.-sp.	Epilobium palustre	Epilobium parviflorum		Müller et al. (2021)
Epilobium x subhirsutum	Gennari	hyb.-sp.	Epilobium hirsutum	Epilobium parviflorum		Müller et al. (2021)
Epilobium x udicola	Hausskn.	hyb.-sp.	Epilobium duriaei	Epilobium palustre		https://powo.science.kew.org/taxon/612411-1
Epipactis x pupplingensis	K.P.Bell	hyb.-sp.	Epipactis atrorubens	Epipactis palustris		Müller et al. (2021)
Epipactis x reineckei	M.Bayer	hyb.-sp.	Epipactis helleborine	Epipactis muelleri		Müller et al. (2021)
Epipactis x schulzei	P.Fourn.	hyb.-sp.	Epipactis helleborine	Epipactis purpurata		Müller et al. (2021)
Equisetum x alsaticum	(H.P.Fuchs & Geissert) G.Phil. ex M.Lubienski & H.W.Bennert	hyb.-sp.	Equisetum hyemale	Equisetum x trachyodon		Müller et al. (2021)
Equisetum x dycei	C.N.Page	hyb.-sp.	Equisetum fluviatile	Equisetum palustre		Müller et al. (2021)
Equisetum x font-queri	Rothm.	hyb.-sp.	Equisetum palustre	Equisetum telmateia		Müller et al. (2021)
Equisetum x littorale	Kühlew. ex Rupr.	hyb.-sp.	Equisetum arvense	Equisetum fluviatile		Müller et al. (2021)
Equisetum x meridionale	(Milde) Chiov.	hyb.-sp.	Equisetum ramosissimum	Equisetum variegatum		Müller et al. (2021)
Equisetum x moorei	Newman	hyb.-sp.	Equisetum hyemale	Equisetum ramosissimum		Dyntaxa (2022)
Equisetum x trachyodon	A.Braun	hyb.-sp.	Equisetum hyemale	Equisetum variegatum		Müller et al. (2021)
Erica x watsonii	Benth.	hyb.-sp.	Erica ciliaris	Erica tetralix		https://powo.science.kew.org/taxon/329909-1
Erigeron x pseudocrispus	Pierrot	hyb.-sp.	Erigeron bonariensis	Erigeron canadensis		https://powo.science.kew.org/taxon/204368-1
Eriophorum x medium	Anderss.	hyb.-sp.	Eriophorum russeolum	Eriophorum scheuchzeri		Dyntaxa (2022)
Erysimum × marshallii	(Henfr.) Bois	hyb.-sp.	Erysimum humile	Erysimum perofskianum		https://powo.science.kew.org/taxon/urn:lsid:ipni.org:names:283977-1
Erythranthe x maculosa	(T.Moore) Mabb.	hyb.-sp.	Erythranthe cuprea	Erythranthe lutea		https://powo.science.kew.org/taxon/urn:lsid:ipni.org:names:77164239-1
Erythranthe x robertsii	(Silverside) G.L.Nesom	hyb.-sp.	Erythranthe guttata	Erythranthe lutea		https://powo.science.kew.org/taxon/77133322-1
Euphrasia x chenevardii	Jaggli	hyb.-sp.	Euphrasia alpina	Euphrasia hirtella		Julve (2009)
Euphrasia x digenea	Wettst.	hyb.-sp.	Euphrasia alpina	Euphrasia rostkoviana		https://powo.science.kew.org/taxon/77175224-1
Euphrasia x haussknechtii	[NA]	hyb.-sp.	Euphrasia nemorosa	Euphrasia stricta		Müller et al. (2021)
Euphrasia x mixta	Gremli	hyb.-sp.	Euphrasia minima	Euphrasia rostkoviana		https://www2.dijon.inrae.fr/flore-france/es-ez.htm
Euphrasia x vernalis	List	hyb.-sp.	Euphrasia rostkoviana	Euphrasia stricta		https://powo.science.kew.org/taxon/urn:lsid:ipni.org:names:802935-1
Fallopia x convolvuloides	(Brügger) Holub	hyb.-sp.	Fallopia convolvulus	Fallopia dumetorum		https://powo.science.kew.org/taxon/urn:lsid:ipni.org:names:77163250-1
Festuca x souliei	St.-Yves	hyb.-sp.	Festuca eskia	Festuca quadriflora		https://www.tela-botanica.org/bdtfx-nn-27656-synthese
Forsythia x intermedia	Zabel	hyb.-sp.	Forsythia suspensa	Forsythia viridissima		Dyntaxa (2022)
Fragaria x intermedia	Bach	hyb.-sp.	Fragaria moschata	Fragaria vesca		https://powo.science.kew.org/taxon/77221966-1
Fragaria x bifera	Láng ex W.D.J.Koch	hyb.-sp.	Fragaria vesca	Fragaria viridis		Müller et al. (2021)
Fragaria x neglecta	Lindem.	hyb.-sp.	Fragaria moschata	Fragaria viridis		Julve (2009)
Fumaria agraria x capreolata	[NA]	hyb.-sp. (formula)	Fumaria agraria	Fumaria capreolata		France
Fumaria agraria x officinalis	[NA]	hyb.-sp. (formula)	Fumaria agraria	Fumaria officinalis		France
Fumaria agraria x officinalis subsp. wirtgenii	[NA]	nothosubsp. (formula)	Fumaria agraria	Fumaria officinalis subsp. wirtgenii		France
Fumaria x chevallieri	E.G.Camus	hyb.-sp.	Fumaria officinalis	Fumaria vaillantii		Julve (2009)
Fumaria x hanryi	A.Camus	hyb.-sp.	Fumaria officinalis	Fumaria parviflora		Julve (2009)
Gagea lutea x pratensis	[NA]	hyb.-sp. (formula)	Gagea lutea	Gagea pratensis		France
Gaillardia x grandiflora	Van Houtte	hyb.-sp.	Gaillardia aristata	Gaillardia pulchella		https://powo.science.kew.org/taxon/208360-1
Galanthus x valentinei	Beck	hyb.-sp.	Galanthus nivalis	Galanthus plicatus		Dyntaxa (2022)
Galeopsis x ludwigii	Hausskn.	hyb.-sp.	Galeopsis bifida	Galeopsis tetrahit		Müller et al. (2021)
Galium x centroniae	Cariot	hyb.-sp.	Galium pumilum	Galium rubrum		https://powo.science.kew.org/taxon/77177110-1
Galium x pomeranicum	Retz.	hyb.-sp.	Galium album	Galium verum		Müller et al. (2021)
Gentiana x charpentieri	E.Thomas ex Hegetschw.	hyb.-sp.	Gentiana lutea	Gentiana punctata		https://powo.science.kew.org/taxon/367959-1
Gentiana x hybrida	Schleich. ex DC.	hyb.-sp.	Gentiana lutea	Gentiana purpurea		https://powo.science.kew.org/taxon/368309-1
Gentiana x marcailhouana	Rouy	hyb.-sp.	Gentiana burseri	Gentiana lutea		https://powo.science.kew.org/taxon/368484-1
Gentiana x spuria	Lebert ex Griseb.	hyb.-sp.	Gentiana punctata	Gentiana purpurea		Müller et al. (2021)
Geranium x magnificum	Hyl.	hyb.-sp.	Geranium ibericum	Geranium platypetalum		Dyntaxa (2022)
Geum x intermedium	Ehrh.	hyb.-sp.	Geum rivale	Geum urbanum		Dyntaxa (2022)
Geum x sudeticum	Tausch	hyb.-sp.	Geum montanum	Geum rivale		Müller et al. (2021)
Glyceria declinata x fluitans	[NA]	hyb.-sp. (formula)	Glyceria declinata	Glyceria fluitans		France
Glyceria declinata x notata	[NA]	hyb.-sp. (formula)	Glyceria declinata	Glyceria notata		France
Glyceria x digenea	Domin	hyb.-sp.	Glyceria fluitans	Glyceria maxima		https://powo.science.kew.org/taxon/404082-1
Gnaphalium x rompelii	J.Murray	hyb.-sp.	Gnaphalium norvegicum	Gnaphalium supinum		https://www.tela-botanica.org/bdtfx-nn-30532-synthese
Helianthemum italixum x marifolium	[NA]	hyb.-sp. (formula)	Helianthemum marifolium	Helianthemum italicum		France
Helosciadium x longipedunculatum	(F.W.Schultz) B.Bock	hyb.-sp.	Helosciadium nodiflorum	Helosciadium repens		Müller et al. (2021)
Hippuris x lanceolata	Retz.	hyb.-sp.	Hippuris tetraphylla	Hippuris vulgaris		Dyntaxa (2022)
Holcus x hybridus	Wein	hyb.-sp.	Holcus lanatus	Holcus mollis		Müller et al. (2021)
Hyacinthoides x massartiana	Geerinck	hyb.-sp.	Hyacinthoides hispanica	Hyacinthoides non-scripta		Dyntaxa (2022)	Olha
Hypericum x desetangsii	Lamotte	hyb.-sp.	Hypericum maculatum	Hypericum perforatum		https://powo.science.kew.org/taxon/433376-1
Hypericum x desetangsii nothosubsp. desetangsii	[NA]	nothosubsp.	Hypericum maculatum subsp. obtusiusculum	Hypericum perforatum subsp. perforatum		https://powo.science.kew.org/taxon/urn:lsid:ipni.org:names:77173245-1
Hypericum x laschii	Froël.	hyb.-sp.	Hypericum maculatum	Hypericum tetrapterum		Müller et al. (2021)
Hypericum x medium	Peterm.	hyb.-sp.	Hypericum perforatum	Hypericum tetrapterum		Müller et al. (2021)
Hypericum x desetangsii nothosubsp. carinthiacum	(A.Fröhl.) N.Robson	nothosubsp.	Hypericum maculatum subsp. maculatum	Hypericum perforatum subsp. perforatum		https://powo.science.kew.org/taxon/urn:lsid:ipni.org:names:1007372-1
Inula x semiamplexicaulis	Reut.	hyb.-sp.	Inula helvetica	Inula salicina		Müller et al. (2021)
Iris x binata	Schur	hyb.-sp.	Iris aphylla	Iris pumila		https://powo.science.kew.org/taxon/438412-1
Iris x germanica	L.	hyb.-sp.	Iris pallida	Iris variegata		https://powo.science.kew.org/taxon/438637-1
Jacobaea x lyratifolius	(Rchb.) B.Bock	hyb.-sp.	Jacobaea alpina	Jacobaea erucifolia		Müller et al. (2021)
Jacobaea x reisachii	(Grembl.) B.Bock	hyb.-sp.	Jacobaea alpina	Jacobaea vulgaris		Müller et al. (2021)
Juncus x alpiniformis	Fernald	hyb.-sp.	Juncus alpinoarticulatus	Juncus articulatus		Müller et al. (2021)
Juncus x diffusus	Hoppe	hyb.-sp.	Juncus effusus	Juncus inflexus		Müller et al. (2021)
Juncus x kern-reichgeltii	Reichg.	hyb.-sp.	Juncus conglomeratus	Juncus effusus		Müller et al. (2021)
Juncus x montserratensis	Marcet	hyb.-sp.	Juncus acutiflorus	Juncus articulatus		Müller et al. (2021)
Kickxia x confinis	(Lacroix) Soó	hyb.-sp.	Kickxia elatine	Kickxia spuria		Müller et al. (2021)
Laburnum x watereri	(G. Kirchn.) Dippel	hyb.-sp.	Laburnum alpinum	Laburnum anagyroides		Dyntaxa (2022)
Lactuca quercina x virosa	[NA]	hyb.-sp. (formula)	Lactuca quercina	Lactuca virosa		France
Lamium x holsaticum	Prahl	hyb.-sp.	Lamium album	Lamium maculatum		Müller et al. (2021)
Larix x marschlinsii	Coaz	hyb.-sp.	Larix decidua	Larix kaempferi		Dyntaxa (2022)
Lavandula x intermedia	Emeric ex Loisel.	hyb.-sp.	Lavandula angustifolia	Lavandula latifolia		Julve (2022)
Leucanthemum x superbum	(Bergmans ex J. W. Ingram) D. H. Kent	hyb.-sp.	Leucanthemum lacustre	Leucanthemum maximum		Dyntaxa (2022)
Limonium graecum x virgatum	[NA]	hyb.-sp. (formula)	Limonium graecum	Limonium virgatum		Greece
Limonium x neumanii	C.E.Salmon	hyb.-sp.	Limonium humile	Limonium vulgare		https://powo.science.kew.org/taxon/686888-1
Lolium x boucheanum	Kunth	hyb.-sp.	Lolium multiflorum	Lolium perenne		https://powo.science.kew.org/taxon/urn:lsid:ipni.org:names:407425-1
Lupinus x regalis	Bergmans	hyb.-sp.	Lupinus arboreus	Lupinus polyphyllus		Dyntaxa (2022)
Luzula x buchenaui	P.Fourn.	hyb.-sp.	Luzula pilosa	Luzula sylvatica		Julve (2009)
Luzula x romanica	F.Dvořák & Vorel	hyb.-sp.	Luzula fosteri	Luzula luzulina		https://powo.science.kew.org/taxon/443922-1
Luzula x somedana	Fern.-Carv. & Fern.Prieto	hyb.-sp.	Luzula pediformis	Luzula sylvatica		https://powo.science.kew.org/taxon/902487-1
Malva x adulterina	Wallr.	hyb.-sp.	Malva neglecta	Malva pusilla		https://powo.science.kew.org/taxon/urn:lsid:ipni.org:names:561513-1
Malva x intermedia	Boreau	hyb.-sp.	Malva alcea	Malva moschata		https://powo.science.kew.org/taxon/561720-1
Malva x zoernigii	Fleischm.	hyb.-sp.	Malva neglecta	Malva sylvestris		https://powo.science.kew.org/taxon/77221801-1
Malva x adulterina	Wallr.	hyb.-sp.	Malva neglecta	Malva pusilla		https://powo.science.kew.org/taxon/561513-1
Medicago x varia	Martyn	hyb.-sp.	Medicago falcata	Medicago sativa		Müller et al. (2021)
Mentha x carinthiaca	Host	hyb.-sp.	Mentha arvensis	Mentha suaveolens		Wisskirchen & Haupler (1998)
Mentha x dalmatica	Tausch	hyb.-sp.	Mentha arvensis	Mentha longifolia		Wisskirchen & Haupler (1998)
Mentha x dumetorum	Schult.	hyb.-sp.	Mentha aquatica	Mentha longifolia		Wisskirchen & Haupler (1998)
Mentha x gracilis	Sole	hyb.-sp.	Mentha arvensis	Mentha spicata		Wisskirchen & Haupler (1998)
Mentha x piperita	L.	hyb.-sp.	Mentha aquatica	Mentha spicata		Wisskirchen & Haupler (1998)
Mentha x rotundifolia	(L.) Huds.	hyb.-sp.	Mentha longifolia	Mentha suaveolens		Wisskirchen & Haupler (1998)
Mentha x smithiana	R.A.Graham	hyb.-sp.	Mentha aquatica	Mentha arvensis	Mentha spicata	Wisskirchen & Haupler (1998)
Mentha x verticillata	L.	hyb.-sp.	Mentha aquatica	Mentha arvensis		Wisskirchen & Haupler (1998)
Mentha x villosa	Huds.	hyb.-sp.	Mentha spicata	Mentha suaveolens		Wisskirchen & Haupler (1998)
Mercurialis x paxii	Graebn.	hyb.-sp.	Mercurialis ovata	Mercurialis perennis		https://powo.science.kew.org/taxon/urn:lsid:ipni.org:names:352209-1
Mimulus x maculosus	T.Moore	hyb.-sp.	Mimulus cupreus	Mimulus luteus		https://powo.science.kew.org/taxon/77164239-1
Mimulus x robertsii	Silverside	hyb.-sp.	Mimulus guttatus	Mimulus luteus		https://www.ipni.org/n/urn:lsid:ipni.org:names:940081-1
Narcissus × compressus	Haw.	hyb.-sp.	Narcissus jonquila	Narcissus tazetta		https://powo.science.kew.org/taxon/65973-1
Narcissus x incomparabilis	Mill.	hyb.-sp.	Narcissus poeticus	Narcissus pseudonarcissus		Dyntaxa (2022)
Narcissus x medioluteus	Mill.	hyb.-sp.	Narcissus poeticus	Narcissus tazetta		https://powo.science.kew.org/taxon/urn:lsid:ipni.org:names:66105-1
Narcissus x odorus	L.	hyb.-sp.	Narcissus jonquilla	Narcissus pseudonarcissus		https://powo.science.kew.org/taxon/urn:lsid:ipni.org:names:66137-1
Nasturtium x sterile	(Airy Shaw) Oefelein	hyb.-sp.	Nasturtium microphyllum	Nasturtium officinale		Müller et al. (2021)
Nepeta x faassenii	Bergmans ex Stearn	hyb.-sp.	Nepeta nepetella	Nepeta racemosa		Dyntaxa (2022)
Nothoscordum x borbonicum	Kunth	hyb.-sp.	Nothoscordum entrerianum	Nothoscordum gracile		WFO (2022)
Nuphar x spenneriana	Gaudin	hyb.-sp.	Nuphar lutea	Nuphar pumila		Müller et al. (2021)
Nymphaea x marliacea	Lat.-Marl.	hyb.-sp.	Nymphaea alba	Nymphaea mexicana		Dyntaxa (2022)
Nymphaea x thiona	D. B. Ward	hyb.-sp.	Nymphaea mexicana	Nymphaea odorata		Dyntaxa (2022)
Odontarrhena x subalpina	(Pall. ex M.Bieb.) D.A.German	hyb.-sp.	Odontarrhena borzaeana	Odontarrhena tortuosa		Ecoflora of Ukraine (2007)
Oenothera biennis x villosa	[NA]	hyb.-sp. (formula)	Oenothera biennis	Oenothera villosa		France
Oenothera glazioviana x subterminalis	[NA]	hyb.-sp. (formula)	Oenothera glazioviana	Oenothera subterminalis		France
Onopordum x godronii	Thell.	hyb.-sp.	Onopordum acanthium	Onopordum tauricum		https://powo.science.kew.org/taxon/urn:lsid:ipni.org:names:235293-1
Ophrys insectifera nothosubsp. tytecaeana	P.Delforge	nothosubsp.	Ophrys insectifera subsp. aymoninii	Ophrys insectifera subsp. insectifera		https://powo.science.kew.org/taxon/917896-1
Ophrys x arachnitiformis	Gren. & M.Philippe	hyb.-sp.	Ophrys holosericea	Ophrys sphegodes		https://powo.science.kew.org/taxon/647755-1
Ophrys x neorupperti	A.Camus ex Ruppert	hyb.-sp.	Ophrys bertolonii	Ophrys scolopax		https://powo.science.kew.org/taxon/648017-1
Ophrys x minuticauda nothosubsp. minuticauda	[NA]	nothosubsp.	Ophrys apifera	Ophrys scolopax subsp. cornuta		https://powo.science.kew.org/taxon/77168710-1
Orchis mascula subsp. mascula x laxiflora	[NA]	nothosubsp. (formula)	Orchis mascula subsp. laxifloriformis	Orchis mascula		France
Orchis mascula x militaris	[NA]	hyb.-sp. (formula)	Orchis mascula	Orchis militaris		France
Orchis x plessidiaca	Renz	hyb.-sp.	Orchis pallens	Orchis provincialis		https://powo.science.kew.org/taxon/urn:lsid:ipni.org:names:649005-1
Orchis x chenevardii	M.Schulze	hyb.-sp.	Dactylorhiza sambucina	Orchis pallens		https://powo.science.kew.org/taxon/77244233-1
Papaver x hungaricum	Borbás	hyb.-sp.	Papaver dubium	Papaver rhoeas		Müller et al. (2021)
Persicaria x pseudolapathum	(Schur) D.H.Kent	hyb.-sp.	Persicaria lapathifolia	Persicaria maculosa		Stace et al. (2015): Hybrid flora of the British Isles
Petasites x rechingeri	Hayek	hyb.-sp.	Petasites albus	Petasites hybridus		https://powo.science.kew.org/taxon/237399-1
Petunia × atkinsiana	D. Don	hyb.-sp.	Petunia axillaris	Petunia integrifolia		Pignatti S., Guarino, R., La Rosa M. (2017-2019) Flora d'Italia, 2nd edition. Edagricole, Edizioni Agricole di New Business Media, Bologna.
Philadelphus x lemoinei	Lemoine	hyb.-sp.	Philadelphus coronarius	Philadelphus microphyllus		Dyntaxa (2022)
Picea x fennica	(Regel) Kom.	hyb.-sp.	Picea abies	Picea obovata		https://powo.science.kew.org/taxon/urn:lsid:ipni.org:names:50958224-1
Pilosella x pseudeffusa	Peter	hyb.-sp.	Pilosella piloselloides	Pilosella piloselloides subsp. praealta		https://powo.science.kew.org/taxon/urn:lsid:ipni.org:names:238266-1
Pinus x ascendens nothosubsp. skalickyi	Businský	nothosubsp.	Pinus mugo	Pinus uncinata subsp. uliginosa		https://powo.science.kew.org/taxon/77107004-1
Pinus x rhaetica	Brügger	hyb.-sp.	Pinus mugo	Pinus sylvestris		http://www.worldfloraonline.org/taxon/wfo-0000481856
Pinus x rhaetica nothosubsp. digenea	(Beck) K.Richt.	nothosubsp.	Pinus mugo subsp. rotundata	Pinus sylvestris		http://www.worldfloraonline.org/taxon/wfo-0001428476
Pinus x rhaetica nothosubsp. rhaetica	[NA]	nothosubsp.	Pinus mugo subsp. mugo	Pinus sylvestris		http://www.worldfloraonline.org/taxon/wfo-0001427287
Pistacia x saportae	Burnat	hyb.-sp.	Pistacia lentiscus	Pistacia terebinthus		https://powo.science.kew.org/taxon/urn:lsid:ipni.org:names:70269-1
Plantago x mixta	Domin	hyb.-sp.	Plantago major	Plantago media		Müller et al. (2021)
Platanthera x hybrida	Brügger	hyb.-sp.	Platanthera bifolia	Platanthera chlorantha		Müller et al. (2021)
Poa x herjedalica	Harry Sm.	hyb.-sp.	Poa alpigena	Poa alpina		Dyntaxa (2022)
Poa x jemtlandica	(Almq.) K. Richt.	hyb.-sp.	Poa alpina	Poa flexuosa		Dyntaxa (2022)
Poa x nobilis	Skalinska	hyb.-sp.	Poa alpina	Poa granitica		https://powo.science.kew.org/taxon/417597-1
Poa x sanionis	Asch. & Graebn.	hyb.-sp.	Poa pratensis	Poa trivialis		Müller et al. (2021)
Polypodium x mantoniae	Rothm.	hyb.-sp.	Polypodium interjectum	Polypodium vulgare		Müller et al. (2021)
Polystichum x bicknellii	(H.Christ) Hahne	hyb.-sp.	Polystichum aculeatum	Polystichum setiferum		Müller et al. (2021)
Polystichum x illyricum	(Borbás) Hahne	hyb.-sp.	Polystichum aculeatum	Polystichum lonchitis		Müller et al. (2021)
Polystichum x luerssenii	Hahne	hyb.-sp.	Polystichum aculeatum	Polystichum braunii		Müller et al. (2021)
Polystrichum x wirgenii	Hahne	hyb.-sp.	Polystichum braunii	Polystichumg setiferum		https://powo.science.kew.org/taxon/urn:lsid:ipni.org:names:17260330-1
Populus x canadensis	Moench	hyb.-sp.	Populus carolinensis	Populus nigra		Dyntaxa (2022)
Populus x canescens	(Aiton) Sm.	hyb.-sp.	Populus alba	Populus tremula		Dyntaxa (2022)
Populus x jackii	Sarg.	hyb.-sp.	Populus balsamifera	Populus carolinensis		Dyntaxa (2022)
Potamogeton x bennettii	Fryer.	hyb.-sp.	Potamogeton crispus	Potamogeton trichoides		https://powo.science.kew.org/taxon/603132-1
Potamogeton x cooperi	(Fryer) Fryer	hyb.-sp.	Potamogeton crispus	Potamogeton perfoliatus		Müller et al. (2021)
Potamogeton x fluitans	Roth	hyb.-sp.	Potamogeton lucens	Potamogeton natans		https://powo.science.kew.org/taxon/603220-1
Potamogeton x nitens	Weber	hyb.-sp.	Potamogeton gramineus	Potamogeton perfoliatus		Müller et al. (2021)
Potamogeton x spathulatus	Schrad. ex W.D.J.Koch & Ziz	hyb.-sp.	Potamogeton alpinus	Potamogeton polygonifolius		https://powo.science.kew.org/taxon/urn:lsid:ipni.org:names:603423-1
Potamogeton x angustifolius	W.D.J.Koch ex Roth	hyb.-sp.	Potamogeton gramineus	Potamogeton lucens		Müller et al. (2021)
Potentilla aurea x Sibbaldia procumbens	[NA]	hyb.-g.	Potentilla aurea	Sibbaldia procumbens		France
Potentilla x mixta	Nolte ex Rchb.	hyb.-sp.	Potentilla anglica	Potentilla reptans		https://powo.science.kew.org/taxon/728507-1
Potentilla x spuria	A.Kern.	hyb.-sp.	Potentilla micrantha	Potentilla sterilis		Müller et al. (2021)
Potentilla x suberecta	Zimmeter	hyb.-sp.	Potentilla anglica	Potentilla erecta		Müller et al. (2021)
Primula x anglica	Pax	hyb.-sp.	Primula veris	Primula vulgaris		https://www.tela-botanica.org/bdtfx-nn-53125-synthese
Primula x digenea	A.Kern.	hyb.-sp.	Primula elatior	Primula vulgaris		https://powo.science.kew.org/taxon/701835-1
Primula x media	Peterm.	hyb.-sp.	Primula elatior	Primula veris		Müller et al. (2021)
Primula x polyantha	Mill.	hyb.-sp.	Primula acaulis	Primula veris		Dyntaxa (2022)
Prunella x codinae	Sennen	hyb.-sp.	Prunella hyssopifolia	Prunella laciniata		https://powo.science.kew.org/taxon/445217-1
Prunella x spuria	Knaf ex A.Kern.	hyb.-sp.	Prunella grandiflora	Prunella vulgaris		Müller et al. (2021)
Prunus x gondouinii	(Poit. & Turpin) Rehder	hyb.-sp.	Prunus avium	Prunus cerasus		Müller et al. (2021)
Puccinellia x elata	(Holmb.) Holmb.	hyb.-sp.	Puccinellia capillaris	Puccinellia distans		Müller et al. (2021)
Puccinellia x hybrida	Holmb.	hyb.-sp.	Puccinellia distans	Puccinellia maritima		Müller et al. (2021)
Pulmonaria x ovalis	Bastard	hyb.-sp.	Pulmonaria affinis	Pulmonaria longifolia		https://powo.science.kew.org/taxon/120405-1
Quercus x andegavensis	Hy	hyb.-sp.	Quercus pyrenaica	Quercus robur		https://powo.science.kew.org/taxon/295782-1
Quercus x auzandri	Gren. & Godr.	hyb.-sp.	Quercus coccifera	Quercus ilex		https://powo.science.kew.org/taxon/295825-1
Quercus x firmurensis	Hy	hyb.-sp.	Quercus pubescens	Quercus pyrenaica		https://powo.science.kew.org/taxon/77176763-1
Quercus x kerneri	Simkovics	hyb.-sp.	Quercus pubescens	Quercus robur		https://powo.science.kew.org/taxon/296334-1
Quercus x morisii	Borzi	hyb.-sp.	Quercus ilex	Quercus suber		https://powo.science.kew.org/taxon/296475-1
Quercus x rosacea	Bechst.	hyb.-sp.	Quercus petraea	Quercus robur		https://powo.science.kew.org/taxon/296693-1
Quercus x streimeri	Heuff. ex Freyn	hyb.-sp.	Quercus petraea	Quercus pubescens		https://powo.science.kew.org/taxon/296778-1
Quercus x trabutii	Hy	hyb.-sp.	Quercus petraea	Quercus pyrenaica		https://powo.science.kew.org/taxon/296849-1
Ranunculus x aurigeranus	H.Marcailhou & A.Marcailhou	hyb.-sp.	Ranunculus auricomus	Ranunculus montanus		https://www.tela-botanica.org/bdtfx-nn-54776-synthese
Ranunculus x chrysanthus	Brügger	hyb.-sp.	Ranunculus repens	Ranunculus tuberosus		https://powo.science.kew.org/taxon/712466-1
Ranunculus x luizetii	Rouy	hyb.-sp.	Ranunculus parnassifolius	Ranunculus pyrenaeus		https://powo.science.kew.org/taxon/713131-1
Ranunculus x lutzii	A.Félix	hyb.-sp.	Ranunculus aquatilis	Ranunculus trichophyllus		https://powo.science.kew.org/taxon/urn:lsid:ipni.org:names:713138-1
Reynoutria x bohemica	Chrtek & Chrtková	hyb.-sp.	Reynoutria japonica	Reynoutria sachalinensis		Müller et al. (2021)
Rhamnus x mercieri	Briq.	hyb.-sp.	Rhamnus alpina	Rhamnus cathartica		France
Rhododendron x intermedium	Tausch	hyb.-sp.	Rhododendron ferrugineum	Rhododendron hirsutum		Müller et al. (2021)
Ribes nigrum x rubrum	[NA]	hyb.-sp. (formula)	Ribes nigrum	Ribes rubrum		France
Ribes x houghtonianum	Jancz.	hyb.-sp.	Ribes rubrum	Ribes spicatum		Dyntaxa (2022)
Ribes x pallidum	Otto & A.Dietr.	hyb.-sp.	Ribes petraeum	Ribes spicatum		Dyntaxa (2022)
Rorippa x anceps	(Wahlenb.) Rchb.	hyb.-sp.	Rorippa amphibia	Rorippa sylvestris		Dyntaxa (2022)
Rorippa x armoracioides	(Tausch) Fuss	hyb.-sp.	Rorippa austriaca	Rorippa sylvestris		Müller et al. (2021)
Rorippa x astyla	(Rchb.) Rchb.	hyb.-sp.	Rorippa amphibia	Rorippa austriaca		https://powo.science.kew.org/taxon/50872368-1
Rosa x centifolia	L.	hyb.-sp.	Rosa canina	Rosa gallica	Rosa moschata	https://powo.science.kew.org/taxon/urn:lsid:ipni.org:names:324763-2
Rosa x damascena	Mill.	hyb.-sp.	Rosa gallica	Rosa phoenicia		Dyntaxa (2022)
Rosa x nitidula	Besser	hyb.-sp.	Rosa canina	Rosa rubiginosa		https://powo.science.kew.org/taxon/urn:lsid:ipni.org:names:733470-1
Rosa x pervirens	Gren. ex Crép.	hyb.-sp.	Rosa arvensis	Rosa sempervirens		https://powo.science.kew.org/taxon/733666-1
Rosa x scabriuscula	Sm.	hyb.-sp.	Rosa canina	Rosa tomentosa		https://powo.science.kew.org/taxon/734150-1
Rosa x spaethiana	Graebn.	hyb.-sp.	Rosa palustris	Rosa rugosa		Dyntaxa (2022)
Rosa x timbalii	Crép. ex Rouy	hyb.-sp.	Rosa obtusifolia	Rosa rubiginosa		https://powo.science.kew.org/taxon/77222038-1
Rosa x verticillantha	Mérat	hyb.-sp.	Rosa arvensis	Rosa canina		https://www.tela-botanica.org/bdtfx-nn-57710-synthese
Rosa x scabriuscula	Winch ex Sm.	hyb.-sp.	Rosa canina	Rosa tomentosa		https://powo.science.kew.org/taxon/734150-1
Rubus x idaeoides	Ruthe ex Focke	hyb.-sp.	Rubus caesius	Rubus idaeus		Müller et al. (2021)
Rumex x abortivus	Ruhmer	hyb.-sp.	Rumex conglomeratus	Rumex obtusifolius		Müller et al. (2021)
Rumex x conspersus	Hartm.	hyb.-sp.	Rumex aquaticus	Rumex crispus		https://powo.science.kew.org/taxon/697004-1
Rumex x dimidiatus	Hausskn.	hyb.-sp.	Rumex crispus	Rumex cristatus		https://powo.science.kew.org/taxon/697048-1
Rumex x dufftii	Hausskn.	hyb.-sp.	Rumex obtusifolius	Rumex sanguineus		Müller et al. (2021)
Rumex x heterophyllus	Schultz	hyb.-sp.	Rumex aquaticus	Rumex hydrolapathum		https://powo.science.kew.org/taxon/697184-1
Rumex x knapfii	Celak.	hyb.-sp.	Rumex conglomeratus	Rumex maritimus		Müller et al. (2021)
Rumex x muretii	Hausskn.	hyb.-sp.	Rumex conglomeratus	Rumex pulcher		https://powo.science.kew.org/taxon/697324-1
Rumex x ogulinensis	Borbás	hyb.-sp.	Rumex obtusifolius	Rumex pulcher		https://powo.science.kew.org/taxon/928259-1
Rumex x pratensis	Mert. & W.D.J.Koch	hyb.-sp.	Rumex crispus	Rumex obtusifolius		https://powo.science.kew.org/taxon/urn:lsid:ipni.org:names:696832-1
Rumex x propinquus	Aresch.	hyb.-sp.	Rumex crispus	Rumex longifolius		Müller et al. (2021)
Rumex x pseudopulcher	Hausskn.	hyb.-sp.	Rumex crispus	Rumex pulcher		https://powo.science.kew.org/taxon/697424-1
Rumex x ruhmeri	Hausskn.	hyb.-sp.	Rumex conglomeratus	Rumex sanguineus		https://powo.science.kew.org/taxon/697468-1
Rumex x sagorskii	Hausskn.	hyb.-sp.	Rumex crispus	Rumex sanguineus		Müller et al. (2021)
Ruscus x microglossum	Bertol.	hyb.-sp.	Ruscus hypoglossum	Ruscus hypophyllum		https://powo.science.kew.org/taxon/540459-1
Sagina x normaniana	Lagerh.	hyb.-sp.	Sagina procumbens	Sagina saginoides		Dyntaxa (2022)
Sagittaria natans x sagittifolia	[NA]	hyb.-sp. (formula)	Sagittaria natans	Sagittaria sagittifolia		Sweden_Tyler
Salicornia x marshallii	(Lambinon & Vanderp.) Stace	hyb.-sp.	Salicornia appressa	Salicornia disarticulata		https://powo.science.kew.org/taxon/urn:lsid:ipni.org:names:77158907-1
Salix aurita x bicolor	[NA]	hyb.-sp. (formula)	Salix aurita	Salix bicolor		France
Salix bicolor x caprea	[NA]	hyb.-sp. (formula)	Salix bicolor	Salix caprea		France
Salix bicolor x cinerea	[NA]	hyb.-sp. (formula)	Salix bicolor	Salix cinerea		France
Salix bicolor x cinerea	[NA]	hyb.-sp. (formula)	Salix bicolor	Salix cinerea		France
Salix bicolor x hastata subsp. hastata	[NA]	nothosubsp. (formula)	Salix bicolor	Salix hastata subsp. hastata		France
Salix bicolor x lapponum	[NA]	hyb.-sp. (formula)	Salix bicolor	Salix lapponum		France
Salix bicolor x repens	[NA]	hyb.-sp. (formula)	Salix bicolor	Salix repens		France
Salix caprea x laggeri	[NA]	hyb.-sp. (formula)	Salix caprea	Salix laggeri		France
Salix caprea x pentandra	[NA]	hyb.-sp. (formula)	Salix caprea	Salix pentandra		France
Salix cinerea x pentrandra	[NA]	hyb.-sp. (formula)	Salix cinerea	Salix pentandra		France
Salix daphnoides x eleagnos	[NA]	hyb.-sp. (formula)	Salix daphnoides	Salix eleagnos		France
Salix daphnoides x purpurea	[NA]	hyb.-sp. (formula)	Salix daphnoides	Salix purpurea		France
Salix eleagnos x laggeri	[NA]	hyb.-sp. (formula)	Salix eleagnos	Salix laggeri		France
Salix pentandra x purpurea	[NA]	hyb.-sp. (formula)	Salix pentandra	Salix purpurea		France
Salix x alopecuroides	Tausch ex Opiz	hyb.-sp.	Salix euxina	Salix triandra		Dyntaxa (2022)
Salix x ambigua	Ehrh.	hyb.-sp.	Salix aurita	Salix repens		Müller et al. (2021)
Salix x arctogena	Flod.	hyb.-sp.	Salix herbacea	Salix phylicifolia		Dyntaxa (2022)
Salix x bifida	Wulfen	hyb.-sp.	Salix eleagnos	Salix purpurea		https://powo.science.kew.org/taxon/777168-1
Salix x capreola	A.Kern. ex Andersson	hyb.-sp.	Salix aurita	Salix caprea		Müller et al. (2021)
Salix x ganderi	Huter ex Zahn	hyb.-sp.	Salix foetida	Salix reticulata		Julve (2022)
Salix x meyeriana	Rostk. ex Willd.	hyb.-sp.	Salix euxina	Salix pentandra		Dyntaxa (2022)
Salix x mollissima	Elwert	hyb.-sp.	Salix triandra	Salix viminalis		Müller et al. (2021)
Salix x multinervis	Döll	hyb.-sp.	Salix aurita	Salix cinerea		Stace et al. (2015): Hybrid flora of the British Isles
Salix x pendulina	Wender.	hyb.-sp.	Salix babylonica	Salix fragilis		Müller et al. (2021)
Salix x pithoensis	Rouy	hyb.-sp.	Salix lapponum	Salix repens		https://powo.science.kew.org/taxon/778504-1
Salix x reichardtii	A.Kern.	hyb.-sp.	Salix caprea	Salix cinerea		Müller et al. (2021)
Salix x rubra	Huds.	hyb.-sp.	Salix purpurea	Salix viminalis		Müller et al. (2021)
Salix x smithiana	Willd.	hyb.-sp.	Salix caprea	Salix viminalis		Dyntaxa (2022)
Salix x subnivalis	Brügger	hyb.-sp.	Salix herbacea	Salix retusa		https://www.tela-botanica.org/bdtfx-nn-59978-synthese
Salix x subsericea	Döll	hyb.-sp.	Salix cinerea	Salix repens		Müller et al. (2021)
Salix x ambigua nothosubsp. maritima	(A.Camus & E.G.Camus) Lambinon	nothosubsp.	Salix aurita	Salix repens subsp. dunensis		https://powo.science.kew.org/taxon/978905-1
Salix x canescens	Willd.	hyb.-sp.	Salix caprea	Salix lapponum		https://powo.science.kew.org/taxon/urn:lsid:ipni.org:names:777245-1
Salvia x sylvestris	L.	hyb.-sp.	Salvia nemorosa	Salivia pratensis		Dyntaxa (2022)
Saxifraga x arendsii	Engl.	hyb.-sp.	Saxifraga hypnoides	Saxifraga rosacea		Dyntaxa (2022)
Saxifraga x geum	L.	hyb.-sp.	Saxifraga hirsuta	Saxifraga umbrosa		Müller et al. (2021)
Saxifraga x haussmannii	A.Kern.	hyb.-sp.	Saxifraga aizoides	Saxifraga mutata		Müller et al. (2021)
Saxifraga x kochii	Hornung	hyb.-sp.	Saxifraga biflora	Saxifraga oppositifolia		Müller et al. (2021)
Saxifraga x opdalensis	A. Blytt	hyb.-sp.	Saxifraga cernua	Saxifraga rivularis		Dyntaxa (2022)
Saxifraga x patens	Gaudin	hyb.-sp.	Saxifraga aizoides	Saxifraga caesia		Müller et al. (2021)
Saxifraga x urbium	D. A. Webb	hyb.-sp.	Saxifraga spathularis	Saxifraga umbrosa		Dyntaxa (2022)
Schedonorus x aschersonianus	(Dörfl.) Holub	hyb.-sp.	Schedonorus arundinaceus	Schedonorus pratensis		https://powo.science.kew.org/taxon/77165035-1
Schoenoplectus x carinatus	(Sm.) Palla	hyb.-sp.	Schoenoplectus lacustris	Schoenoplectus triqueter		Müller et al. (2021)
Schoenus x intermedius	Brügger	hyb.-sp.	Schoenus ferrugineus	Schoenus nigricans		Müller et al. (2021)
Scilla x allenii	(G. Nicholson) Speta	hyb.-sp.	Scilla bifolia	Scilla forbesii		Dyntaxa (2022)
Scutellaria x nicholsonii	Taub.	hyb.-sp.	Scutellaria galericulata	Scutellaria minor		https://powo.science.kew.org/taxon/urn:lsid:ipni.org:names:458491-1
Sempervivum x giuseppii	Wale	hyb.-sp.	Sempervivum arachnoideum	Sempervivum vincentei
Setaria verticillata x viridis	[NA]	hyb.-sp. (formula)	Setaria verticillata	Setaria viridis
Silene x hampeana	Meusel & K.Werner	hyb.-sp.	Silene dioica	Silene latifolia		Müller et al. (2021)
Sorbus x ambigua	(Michalet ex Decne.) Nyman ex Hedl.	hyb.-sp.	Sorbus aria	Sorbus chamaemespilus		https://www.tela-botanica.org/bdtfx-nn-73373-synthese
Sorbus x tomentella	Gand.	hyb.-sp.	Sorbus aria	Sorbus torminalis		https://www.tela-botanica.org/bdtfx-nn-65338-synthese
Sorbus x torminaloides	Rouy	hyb.-sp.	Sorbus latifolia	Sorbus torminalis		https://www.gbif.org/species/3013162
Sparganium x oocarpum	(Celak.) Fritsch	hyb.-sp.	Sparganium erectum	Sparganium neglectum		https://de.wikipedia.org/wiki/%C3%84stiger_Igelkolben
Spartina x townsendii	H.Groves & J.Groves	hyb.-sp.	Spartina alterniflora	Spartina maritima		Müller et al. (2021)
Spergularia x kurkae	F.Dvořák	hyb.-sp.	Spergularia echinosperma	Spergularia rubra		Müller et al. (2021)
Spiraea x billardii	Hérincq	hyb.-sp.	Spiraea douglasii	Spiraea salicifolia		Dyntaxa (2022)
Spiraea x cinerea	Zabel	hyb.-sp.	Spiraea cana	Spiraea hypericifolia		Dyntaxa (2022)
Spiraea x macrothyrsa	Dippel	hyb.-sp.	Spiraea douglasii	Spiraea latifolia		Dyntaxa (2022)
Spiraea x pseudosalicifolia	Silverside	hyb.-sp.	Spiraea salicifolia	Spiraea douglasii		https://powo.science.kew.org/taxon/940075-1
Spiraea x rosalba	Dippel	hyb.-sp.	Spiraea alba	Spiraea latifolia		Dyntaxa (2022)
Spiraea x rubella	Dippel	hyb.-sp.	Spiraea latifolia	Spiraea salicifolia		Dyntaxa (2022)
Spiraea x semperflorens	Zabel	hyb.-sp.	Spiraea japonica	Spiraea salicifolia		https://powo.science.kew.org/taxon/742522-1
Spiraea x vanhouttei	(Briot) Zabel	hyb.-sp.	Spiraea cantoniensis	Spiraea trilobata		Dyntaxa (2022)
Stachys x ambigua	Sm.	hyb.-sp.	Stachys palustris	Stachys sylvatica		Müller et al. (2021)
Stachys x medebachensis	Feldmann & A.Koenig	hyb.-sp.	Stachys alpina	Stachys sylvatica		Müller et al. (2021)
Symphoricarpos x chenaultii	Rehder	hyb.-sp.	Symphoricarpos microphyllus	Symphoricarpos orbiculatus		Müller et al. (2021)
Symphyotrichum x salignum	(Willd.) G. L. Nesom	hyb.-sp.	Symphyotrichum lanceolatus	Symphyotrichum novi-belgii		Dyntaxa (2022)
Symphyotrichum x versicolor	(Willd.) G. L. Nesom	hyb.-sp.	Symphyotrichum laeve	Symphyotrichum novi-belgii		Dyntaxa (2022)
Symphytum x uplandicum	Nyman	hyb.-sp.	Symphytum asperum	Symphytum officinale		Müller et al. (2021)
Syringa x henryi	C. K. Schneid.	hyb.-sp.	Syringa josikaeae	Syringa villosa		Dyntaxa (2022)
Taxus x media	Rehder	hyb.-sp.	Taxus baccata	Taxus cuspidata		Dyntaxa (2022)
Thalictrum x timeroyi	Jord.	hyb.-sp.	Thalictrum minus	Thalictrum simplex		Müller et al. (2021)
Thymus x aveyronensis	H.J.Coste & Soulié	hyb.-sp.	Thymus serpyllum	Thymus vulgaris		Müller et al. (2021)
Thymus x pseudoalpestris	Ronniger ex F.Weber	hyb.-sp.	Thymus alpestris	Thymus pulegioides		Müller et al. (2021)
Thymus x tschernjajevii	Klokov & Des.-Shost.	hyb.-sp.	Thymus pallasianus	Thymus pulegioides		https://powo.science.kew.org/taxon/461734-1
Thymus x dimorphus	Klokov & Des.-Shost.	hyb.-sp.	Thymus calcareus	Thymus pulegioides		https://powo.science.kew.org/taxon/urn:lsid:ipni.org:names:461109-1
Tilia x europaea	L.	hyb.-sp.	Tilia cordata	Tilia platyphyllos		Müller et al. (2021)
Tradescantia x andersoniana	W.Ludw. & Rohweder	hyb.-sp.	Tradescantia ohiensis	Tradescantia subaspera		https://www.ipni.org/n/urn:lsid:ipni.org:names:173208-1
Trifolium x bertrandii	Rouy	hyb.-sp.	Trifolium medium	Trifolium rubens		https://powo.science.kew.org/taxon/522914-1
Typha domingensis x laxmannii	[NA]	hyb.-sp. (formula)	Typha domingensis	Typha laxmannii		France
Typha latifolia x laxmannii	[NA]	hyb.-sp. (formula)	Typha latifolia	Typha laxmannii		France
Typha x bavarica	Graebn.	hyb.-sp.	Typha angustifolia	Typha shuttleworthii		Müller et al. (2021)
Typha x glauca	Godr.	hyb.-sp.	Typha angustifolia	Typha latifolia		https://powo.science.kew.org/taxon/urn:lsid:ipni.org:names:836853-1
Typha x provincialis	A.Camus	hyb.-sp.	Typha domingensis	Typha latifolia		https://powo.science.kew.org/taxon/urn:lsid:ipni.org:names:836899-1
Ulmus x hollandica	Mill.	hyb.-sp.	Ulmus glabra	Ulmus minor		Dyntaxa (2022)
Verbascum x diphyon	Franch.	hyb.-sp.	Verbascum densiflorum	Verbascum sinuatum		https://powo.science.kew.org/taxon/urn:lsid:ipni.org:names:811019-1
Verbascum x godronii	Boreau	hyb.-sp.	Verbascum pulverulentum	Verbascum thapsus		Müller et al. (2021)
Verbascum x humnickii	Franch.	hyb.-sp.	Verbascum densiflorum	Verbascum thapsus		https://powo.science.kew.org/taxon/769907-1
Verbascum x hybridum	Brot.	hyb.-sp.	Verbascum pulverulentum	Verbascum sinuatum		https://powo.science.kew.org/taxon/urn:lsid:ipni.org:names:769909-1
Verbascum x laramberguei	Rouy	hyb.-sp.	Verbascum boerhavii	Verbascum thapsus		https://powo.science.kew.org/taxon/urn:lsid:ipni.org:names:811219-1
Verbascum x lichnitidi-blattaria	W.D.J.Koch	hyb.-sp.	Verbascum blattaria	Verbascum lychnitis		Müller et al. (2021)
Verbascum x longeracemosum	Chaub.	hyb.-sp.	Verbascum sinuatum	Verbascum thapsus		https://powo.science.kew.org/taxon/769959-1
Verbascum x macilentum	Franch.	hyb.-sp.	Verbascum blattaria	Verbascum pulverulentum		https://powo.science.kew.org/taxon/769970-1
Verbascum x nothum	W.D.J.Koch	hyb.-sp.	Verbascum densiflorum	Verbascum pulverulentum		Müller et al. (2021)
Verbascum x nuriae	Sennen	hyb.-sp.	Verbascum boerhavii	Verbascum pulverulentum		https://www.tela-botanica.org/bdtfx-nn-70910-synthese
Verbascum x pterocaulon	Franch.	hyb.-sp.	Verbascum blattaria	Verbascum thapsus		https://www.ipni.org/n/urn:lsid:ipni.org:names:770069-1
Verbascum x ramigerum	Link ex Schrad.	hyb.-sp.	Verbascum densiflorum	Verbascum lychnitis		Müller et al. (2021)
Verbascum x regelianum	Wirtg.	hyb.-sp.	Verbascum lychnitis	Verbascum pulverulentum		https://powo.science.kew.org/taxon/770090-1
Verbascum x bastardii	Roem. & Schult.	hyb.-sp.	Verbascum blattaria	Verbascum densiflorum		Müller et al. (2021)
Veronica x godronii	Rouy	hyb.-sp.	Veronica chamaedrys	Veronica montana		https://powo.science.kew.org/taxon/urn:lsid:ipni.org:names:812042-1
Veronica x lackzschewickii	J.Keller	hyb.-sp.	Veronica anagallis-aquatica	Veronica catenata		Müller et al. (2021)
Viola x adulterina	Godr.	hyb.-sp.	Viola alba	Viola hirta		Müller et al. (2021)
Viola x bavarica	Schrank	hyb.-sp.	Viola reichenbachiana	Viola riviniana		Müller et al. (2021)
Viola x digenea	Rouy & Foucaud	hyb.-sp.	Viola alba	Viola riviniana		https://www.tela-botanica.org/bdtfx-nn-72212-synthese
Viola x gremblichii	J.Murray	hyb.-sp.	Viola odorata	Viola pyrenaica		https://www.tela-botanica.org/bdtfx-nn-72259-synthese
Viola x intersita	Beck	hyb.-sp.	Viola canina	Viola riviniana		Müller et al. (2021)
Viola x mantziana	W.Becker	hyb.-sp.	Viola lutea	Viola tricolor		https://www.tela-botanica.org/bdtfx-nn-72351-synthese
Viola x militaris	Savouré	hyb.-sp.	Viola canina	Viola lactea		https://powo.science.kew.org/taxon/urn:lsid:ipni.org:names:77221950-1
Viola x mixta	A.Kern.	hyb.-sp.	Viola canina	Viola reichenbachiana		Müller et al. (2021)
Viola x multicaulis	Jord.	hyb.-sp.	Viola alba	Viola odorata		Müller et al. (2021)
Viola x olimpia	Beggiato	hyb.-sp.	Viola odorata	Viola reichenbachiana		https://powo.science.kew.org/taxon/urn:lsid:ipni.org:names:868839-1
Viola x orophila	Wiesb.	hyb.-sp.	Viola mirabilis	Viola riviniana		Müller et al. (2021)
Viola x pacheri	Wiesb.	hyb.-sp.	Viola hirta	Viola pyrenaica		https://www.tela-botanica.org/bdtfx-nn-72418-synthese
Viola x ritschliana	W. Becker	hyb.-sp.	Viola canina	Viola stagnina		https://powo.science.kew.org/taxon/urn:lsid:ipni.org:names:869125-1
Viola x semseyana	Borbás	hyb.-sp.	Viola canina	Viola pumila		Müller et al. (2021)
Viola x spuria	Celak.	hyb.-sp.	Viola mirabilis	Viola reichenbachiana		https://www.tela-botanica.org/bdtfx-nn-72538-synthese
Viola x wittrockiana	Gams ex Kappert	hyb.-sp.	Viola altaica	Viola lutea		Dyntaxa (2022)
x Aegilotriticum triticoides	van Slageren	hyb.-g.	Aegilops geniculata	Triticum aestivum		https://powo.science.kew.org/taxon/982661-1
x Agropogon lutosus	(Sm.) C.E.Hubb.	hyb.-g.	Agrostis stolonifera	Polypogon monspeliensis		Müller et al. (2021)
x Calammophila baltica	(Schrad.) Brand	hyb.-g.	Ammophila arenaria	Calamagrostis epigejos		Müller et al. (2021)
x Cupressocyparis leylandii	A.B.Jacks. & Dallim.	hyb.-g.	Cupressus macrocarpa	Xanthocyparis nootkatensis		https://www.tela-botanica.org/bdtfx-nn-79415-synthese
x Dactylocamptis arbostii	(E.G.Camus) B.Bock	hyb.-g.	Anacamptis morio	Dactylorhiza incarnata		https://powo.science.kew.org/taxon/77118750-1
x Dactylocamptis boudieri	(E.G.Camus) B.Bock	hyb.-g.	Anacamptis morio	Dactylorhiza majalis		https://powo.science.kew.org/taxon/77118751-1
x Dactylocamptis chassagnei	(Alleiz.) B.Bock	hyb.-g.	Anacamptis laxiflora	Dactylorhiza majalis		https://powo.science.kew.org/taxon/77118752-1
x Dactylocamptis leguei	(E.G.Camus) B.Bock	hyb.-g.	Anacamptis laxiflora	Dactylorhiza incarnata		https://powo.science.kew.org/taxon/77118757-1
x Dactylocamptis timbaliana	(E.G.Camus) B.Bock	hyb.-g.	Anacamptis morio	Dactylorhiza maculata		https://powo.science.kew.org/taxon/77118774-1
x Dactylodenia fuchsii	(G.Keller & Soó) Peitz	hyb.-g.	Dactylorhiza traunsteineri	Gymnadenia conopsea		https://powo.science.kew.org/taxon/941848-1
x Dactylodenia lebrunii	(E.G.Camus) Peitz	hyb.-g.	Dactylorhiza majalis	Gymnadenia conopsea		https://powo.science.kew.org/taxon/941846-1
x Dactylodenia legrandiana	(E.G.Camus) Peitz	hyb.-g.	Dactylorhiza maculata	Gymnadenia conopsea		https://powo.science.kew.org/taxon/941840-1
x Dactylodenia wintonii	(Druce) Peitz	hyb.-g.	Dactylorhiza praetermissa	Gymnadenia conopsea		https://powo.science.kew.org/taxon/941842-1
x Elytrordeum rouxii	(Gren. & Duval-Jouve) Kerguélen	hyb.-g.	Elytrigia atherica	Hordeum secalinum		https://www.tela-botanica.org/bdtfx-nn-23922-synthese
x Orchidactyla kromayeri	(M.Schulze) Soó	hyb.-g.	Dactylorhiza maculata subsp. maculata	Orchis mascula subsp. mascula		https://www.tela-botanica.org/bdtfx-nn-75819-synthese
x Polygonorumex guinetii	J.Weill	hyb.-g.	Persicaria hydropiper	Rumex obtusifolius		https://powo.science.kew.org/taxon/695288-1
x Schedolium loliaceum	(Huds.) Holub	hyb.-g.	Lolium perenne	Schedonorus pratensis		Stace et al. (2015): Hybrid flora of the British Isles
x Triticosecale rimpaui	Wittm.	hyb.-g.	Secale cereale	Triticum aestivum		Müller et al. (2021)

## Sheet: Table S3.3. Aggregate defin.
Taxon.accepted	Rank.accepted	Children.accepted	Source for aggregate definition	Modification of source
Acer opalus aggr.	aggr.	Acer granatense	[ad hoc]
Acer opalus aggr.	aggr.	Acer obtusatum	[ad hoc]
Acer opalus aggr.	aggr.	Acer opalus	[ad hoc]
Achillea atrata aggr.	aggr.	Achillea atrata	Landolt et al. (2010)
Achillea atrata aggr.	aggr.	Achillea clusiana	Landolt et al. (2010)
Achillea millefolium aggr.	aggr.	Achillea apiculata	Euro+Med (2022)
Achillea millefolium aggr.	aggr.	Achillea asiatica	Euro+Med (2022)
Achillea millefolium aggr.	aggr.	Achillea aspleniifolia	Euro+Med (2022)
Achillea millefolium aggr.	aggr.	Achillea carpatica	Euro+Med (2022)
Achillea millefolium aggr.	aggr.	Achillea collina	Euro+Med (2022)
Achillea millefolium aggr.	aggr.	Achillea distans	Euro+Med (2022)
Achillea millefolium aggr.	aggr.	Achillea euxina	Euro+Med (2022)
Achillea millefolium aggr.	aggr.	Achillea inundata	Euro+Med (2022)
Achillea millefolium aggr.	aggr.	Achillea millefolium	Euro+Med (2022)
Achillea millefolium aggr.	aggr.	Achillea nigrescens	Euro+Med (2022)
Achillea millefolium aggr.	aggr.	Achillea pannonica	Euro+Med (2022)
Achillea millefolium aggr.	aggr.	Achillea pratensis	Euro+Med (2022)
Achillea millefolium aggr.	aggr.	Achillea roseoalba	Euro+Med (2022)
Achillea millefolium aggr.	aggr.	Achillea setacea	Euro+Med (2022)
Achillea millefolium aggr.	aggr.	Achillea stepposa	Euro+Med (2022)
Achillea millefolium aggr.	aggr.	Achillea styriaca	Euro+Med (2022)
Achillea nobilis aggr.	aggr.	Achillea ligustica	Landolt et al. (2010)
Achillea nobilis aggr.	aggr.	Achillea nobilis	Landolt et al. (2010)
Achillea nobilis aggr.	aggr.	Achillea odorata	Landolt et al. (2010)
Achillea nobilis aggr.	aggr.	Achillea virescens	Landolt et al. (2010)
Achillea ptarmica aggr.	aggr.	Achillea ptarmica	Ehrendorfer (1973)	Inclusion of Achillea pyrenaica
Achillea ptarmica aggr.	aggr.	Achillea pyrenaica	Ehrendorfer (1973)	Inclusion of Achillea pyrenaica
Achillea ptarmica aggr.	aggr.	Achillea salicifolia	Ehrendorfer (1973)	Inclusion of Achillea pyrenaica
Acis nicaeense aggr.	aggr.	Acis fabrei	Landolt et al. (2010)	Genus changed
Acis nicaeense aggr.	aggr.	Acis nicaeensis	Landolt et al. (2010)	Genus changed
Acis nicaeensis aggr.	aggr.	Acis fabrei	Landolt et al. (2010)	Genus changed: Leucojum > Acis
Acis nicaeensis aggr.	aggr.	Acis nicaeensis	Landolt et al. (2010)	Genus changed: Leucojum > Acis
Aconitum napellus aggr.	aggr.	Aconitum angustifolium	Landolt et al. (2010)
Aconitum napellus aggr.	aggr.	Aconitum burnatii	Landolt et al. (2010)
Aconitum napellus aggr.	aggr.	Aconitum napellus	Landolt et al. (2010)
Aconitum napellus aggr.	aggr.	Aconitum plicatum	Landolt et al. (2010)
Aconitum napellus aggr.	aggr.	Aconitum tauricum	Landolt et al. (2010)
Aconitum variegatum aggr.	aggr.	Aconitum degenii	Ehrendorfer (1973), Landolt et al. (2010)
Aconitum variegatum aggr.	aggr.	Aconitum lasiocarpum	Ehrendorfer (1973), Landolt et al. (2010)
Aconitum variegatum aggr.	aggr.	Aconitum pilipes	Ehrendorfer (1973), Landolt et al. (2010)
Adonis aestivalis aggr.	aggr.	Adonis aestivalis	Landolt et al. (2010)	Inclusion of Adonis cretica
Adonis aestivalis aggr.	aggr.	Adonis cretica	Landolt et al. (2010)	Inclusion of Adonis cretica
Adonis aestivalis aggr.	aggr.	Adonis microcarpa	Landolt et al. (2010)	Inclusion of Adonis cretica
Adonis vernalis aggr.	aggr.	Adonis pyrenaica	Landolt et al. (2010)
Adonis vernalis aggr.	aggr.	Adonis vernalis	Landolt et al. (2010)
Aegilops geniculata aggr.	aggr.	Aegilops geniculata	Juillerat et al. (2017)
Aegilops geniculata aggr.	aggr.	Aegilops neglecta	Juillerat et al. (2017)
Agropyron pectinatum aggr.	aggr.	Agropyron cristatum	Landolt et al. (2010)
Agropyron pectinatum aggr.	aggr.	Agropyron desertorum	Landolt et al. (2010)
Agrostis alpina aggr.	aggr.	Agrostis alpina	Ehrendorfer (1973)
Agrostis alpina aggr.	aggr.	Agrostis schleicheri	Ehrendorfer (1973)
Agrostis canina aggr.	aggr.	Agrostis canina	Ehrendorfer (1973)
Agrostis canina aggr.	aggr.	Agrostis vinealis	Ehrendorfer (1973)
Agrostis capillaris aggr. s.l.	aggr. s.l.	Agrostis capillaris	Landolt et al. (2010)	aggr. > aggr. s.l.
Agrostis capillaris aggr. s.l.	aggr. s.l.	Agrostis castellana	Landolt et al. (2010)	aggr. > aggr. s.l.
Agrostis capillaris aggr. s.l.	aggr. s.l.	Agrostis stolonifera aggr.	Landolt et al. (2010)	aggr. > aggr. s.l.
Agrostis stolonifera aggr.	aggr.	Agrostis gigantea	Ehrendorfer (1973)
Agrostis stolonifera aggr.	aggr.	Agrostis stolonifera	Ehrendorfer (1973)
Aira caryophyllea aggr.	aggr.	Aira caryophyllea	Landolt et al. (2010)
Aira caryophyllea aggr.	aggr.	Aira cupaniana	Landolt et al. (2010)
Aira caryophyllea aggr.	aggr.	Aira tenorei	Landolt et al. (2010)
Aira elegantissima aggr.	aggr.	Aira elegans	[ad hoc]
Aira elegantissima aggr.	aggr.	Aira elegantissima	[ad hoc]
Alcea rosea aggr.	aggr.	Alcea biennis	Landolt et al. (2010)
Alcea rosea aggr.	aggr.	Alcea rosea	Landolt et al. (2010)
Alchemilla alpina aggr.	aggr.	Alchemilla alpina	Ehrendorfer (1973)
Alchemilla alpina aggr.	aggr.	Alchemilla amphibola	Ehrendorfer (1973)
Alchemilla alpina aggr.	aggr.	Alchemilla argentidens	Ehrendorfer (1973)
Alchemilla alpina aggr.	aggr.	Alchemilla debilicaulis	Ehrendorfer (1973)
Alchemilla alpina aggr.	aggr.	Alchemilla opaca	Ehrendorfer (1973)
Alchemilla alpina aggr.	aggr.	Alchemilla saxatilis	Ehrendorfer (1973)
Alchemilla alpina aggr.	aggr.	Alchemilla saxetana	Ehrendorfer (1973)
Alchemilla alpina aggr.	aggr.	Alchemilla subsericea	Ehrendorfer (1973)
Alchemilla alpina aggr.	aggr.	Alchemilla transiens	Ehrendorfer (1973)
Alchemilla alpina aggr.	aggr.	Alchemilla vaccariana	Ehrendorfer (1973)
Alchemilla alpina aggr. s.l.	aggr. s.l.	Alchemilla alpina aggr.	Landolt et al. (2010)
Alchemilla alpina aggr. s.l.	aggr. s.l.	Alchemilla brachetiana	Landolt et al. (2010)
Alchemilla alpina aggr. s.l.	aggr. s.l.	Alchemilla conjuncta aggr.	Landolt et al. (2010)
Alchemilla alpina aggr. s.l.	aggr. s.l.	Alchemilla coruscans	Landolt et al. (2010)
Alchemilla alpina aggr. s.l.	aggr. s.l.	Alchemilla cuneata	Landolt et al. (2010)
Alchemilla alpina aggr. s.l.	aggr. s.l.	Alchemilla federiciana	Landolt et al. (2010)
Alchemilla alpina aggr. s.l.	aggr. s.l.	Alchemilla sabauda	Landolt et al. (2010)
Alchemilla alpina aggr. s.l.	aggr. s.l.	Alchemilla tenerrima	Landolt et al. (2010)
Alchemilla alpina aggr. s.l.	aggr. s.l.	Alchemilla velebitica	Landolt et al. (2010)
Alchemilla conjuncta aggr.	aggr.	Alchemilla alpigena	Ehrendorfer (1973)	Complemented with Juillerat et al. (2017)
Alchemilla conjuncta aggr.	aggr.	Alchemilla amphisericea	Ehrendorfer (1973)	Complemented with Juillerat et al. (2017)
Alchemilla conjuncta aggr.	aggr.	Alchemilla anisiaca	Ehrendorfer (1973)	Complemented with Juillerat et al. (2017)
Alchemilla conjuncta aggr.	aggr.	Alchemilla atrovirens	Ehrendorfer (1973)	Complemented with Juillerat et al. (2017)
Alchemilla conjuncta aggr.	aggr.	Alchemilla buseri	Ehrendorfer (1973)	Complemented with Juillerat et al. (2017)
Alchemilla conjuncta aggr.	aggr.	Alchemilla catalaunica	Ehrendorfer (1973)	Complemented with Juillerat et al. (2017)
Alchemilla conjuncta aggr.	aggr.	Alchemilla chirophylla	Ehrendorfer (1973)	Complemented with Juillerat et al. (2017)
Alchemilla conjuncta aggr.	aggr.	Alchemilla conjuncta	Ehrendorfer (1973)	Complemented with Juillerat et al. (2017)
Alchemilla conjuncta aggr.	aggr.	Alchemilla flavovirens	Ehrendorfer (1973)	Complemented with Juillerat et al. (2017)
Alchemilla conjuncta aggr.	aggr.	Alchemilla florulenta	Ehrendorfer (1973)	Complemented with Juillerat et al. (2017)
Alchemilla conjuncta aggr.	aggr.	Alchemilla font-queri	Ehrendorfer (1973)	Complemented with Juillerat et al. (2017)
Alchemilla conjuncta aggr.	aggr.	Alchemilla glacialis	Ehrendorfer (1973)	Complemented with Juillerat et al. (2017)
Alchemilla conjuncta aggr.	aggr.	Alchemilla grossidens	Ehrendorfer (1973)	Complemented with Juillerat et al. (2017)
Alchemilla conjuncta aggr.	aggr.	Alchemilla hoppeana	Ehrendorfer (1973)	Complemented with Juillerat et al. (2017)
Alchemilla conjuncta aggr.	aggr.	Alchemilla jugensis	Ehrendorfer (1973)	Complemented with Juillerat et al. (2017)
Alchemilla conjuncta aggr.	aggr.	Alchemilla leptoclada	Ehrendorfer (1973)	Complemented with Juillerat et al. (2017)
Alchemilla conjuncta aggr.	aggr.	Alchemilla longinodis	Ehrendorfer (1973)	Complemented with Juillerat et al. (2017)
Alchemilla conjuncta aggr.	aggr.	Alchemilla murisserica	Ehrendorfer (1973)	Complemented with Juillerat et al. (2017)
Alchemilla conjuncta aggr.	aggr.	Alchemilla nitida	Ehrendorfer (1973)	Complemented with Juillerat et al. (2017)
Alchemilla conjuncta aggr.	aggr.	Alchemilla pallens	Ehrendorfer (1973)	Complemented with Juillerat et al. (2017)
Alchemilla conjuncta aggr.	aggr.	Alchemilla petiolulans	Ehrendorfer (1973)	Complemented with Juillerat et al. (2017)
Alchemilla conjuncta aggr.	aggr.	Alchemilla petraea	Ehrendorfer (1973)	Complemented with Juillerat et al. (2017)
Alchemilla conjuncta aggr.	aggr.	Alchemilla scintillans	Ehrendorfer (1973)	Complemented with Juillerat et al. (2017)
Alchemilla fissa aggr.	aggr.	Alchemilla fallax	Ehrendorfer (1973)	Complemented with Juillerat et al. (2017)
Alchemilla fissa aggr.	aggr.	Alchemilla firma	Ehrendorfer (1973)	Complemented with Juillerat et al. (2017)
Alchemilla fissa aggr.	aggr.	Alchemilla fissa	Ehrendorfer (1973)	Complemented with Juillerat et al. (2017)
Alchemilla fissa aggr.	aggr.	Alchemilla flexicaulis	Ehrendorfer (1973)	Complemented with Juillerat et al. (2017)
Alchemilla fissa aggr.	aggr.	Alchemilla galkinae	Ehrendorfer (1973)	Complemented with Juillerat et al. (2017)
Alchemilla fissa aggr.	aggr.	Alchemilla incisa	Ehrendorfer (1973)	Complemented with Juillerat et al. (2017)
Alchemilla fissa aggr.	aggr.	Alchemilla minutidens	Ehrendorfer (1973)	Complemented with Juillerat et al. (2017)
Alchemilla fissa aggr.	aggr.	Alchemilla othmarii	Ehrendorfer (1973)	Complemented with Juillerat et al. (2017)
Alchemilla fissa aggr.	aggr.	Alchemilla sericoneura	Ehrendorfer (1973)	Complemented with Juillerat et al. (2017)
Alchemilla fissa aggr.	aggr.	Alchemilla venosula	Ehrendorfer (1973)	Complemented with Juillerat et al. (2017)
Alchemilla hybrida aggr.	aggr.	Alchemilla cinerea	Ehrendorfer (1973)	Complemented with Juillerat et al. (2017)
Alchemilla hybrida aggr.	aggr.	Alchemilla colorata	Ehrendorfer (1973)	Complemented with Juillerat et al. (2017)
Alchemilla hybrida aggr.	aggr.	Alchemilla exigua	Ehrendorfer (1973)	Complemented with Juillerat et al. (2017)
Alchemilla hybrida aggr.	aggr.	Alchemilla flabellata	Ehrendorfer (1973)	Complemented with Juillerat et al. (2017)
Alchemilla hybrida aggr.	aggr.	Alchemilla glaucescens	Ehrendorfer (1973)	Complemented with Juillerat et al. (2017)
Alchemilla hybrida aggr.	aggr.	Alchemilla helvetica	Ehrendorfer (1973)	Complemented with Juillerat et al. (2017)
Alchemilla hybrida aggr.	aggr.	Alchemilla hybrida	Ehrendorfer (1973)	Complemented with Juillerat et al. (2017)
Alchemilla hybrida aggr.	aggr.	Alchemilla plicata	Ehrendorfer (1973)	Complemented with Juillerat et al. (2017)
Alchemilla hybrida aggr.	aggr.	Alchemilla psilopodia	Ehrendorfer (1973)	Complemented with Juillerat et al. (2017)
Alchemilla hybrida aggr.	aggr.	Alchemilla radiisecta	Ehrendorfer (1973)	Complemented with Juillerat et al. (2017)
Alchemilla hybrida aggr.	aggr.	Alchemilla vetteri	Ehrendorfer (1973)	Complemented with Juillerat et al. (2017)
Alchemilla pentaphyllea aggr.	aggr.	Alchemilla gemmia	[ad hoc]
Alchemilla pentaphyllea aggr.	aggr.	Alchemilla pentaphyllea	[ad hoc]
Alchemilla pentaphyllea aggr.	aggr.	Alchemilla pentaphylloides	[ad hoc]
Alchemilla pentaphyllea aggr.	aggr.	Alchemilla trullata	[ad hoc]
Alchemilla splendens aggr.	aggr.	Alchemilla gingolphiana	Ehrendorfer (1973)	Complemented with Juillerat et al. (2017)
Alchemilla splendens aggr.	aggr.	Alchemilla infravallesia	Ehrendorfer (1973)	Complemented with Juillerat et al. (2017)
Alchemilla splendens aggr.	aggr.	Alchemilla jaquetiana	Ehrendorfer (1973)	Complemented with Juillerat et al. (2017)
Alchemilla splendens aggr.	aggr.	Alchemilla kerneri	Ehrendorfer (1973)	Complemented with Juillerat et al. (2017)
Alchemilla splendens aggr.	aggr.	Alchemilla paicheana	Ehrendorfer (1973)	Complemented with Juillerat et al. (2017)
Alchemilla splendens aggr.	aggr.	Alchemilla schmidelyana	Ehrendorfer (1973)	Complemented with Juillerat et al. (2017)
Alchemilla splendens aggr.	aggr.	Alchemilla splendens	Ehrendorfer (1973)	Complemented with Juillerat et al. (2017)
Alchemilla vulgaris aggr.	aggr.	Alchemilla acuminatidens	Ehrendorfer (1973)	Complemented with Juillerat et al. (2017)
Alchemilla vulgaris aggr.	aggr.	Alchemilla acutidens	Ehrendorfer (1973)	Complemented with Juillerat et al. (2017)
Alchemilla vulgaris aggr.	aggr.	Alchemilla acutiloba	Ehrendorfer (1973)	Complemented with Juillerat et al. (2017)
Alchemilla vulgaris aggr.	aggr.	Alchemilla aggregata	Ehrendorfer (1973)	Complemented with Juillerat et al. (2017)
Alchemilla vulgaris aggr.	aggr.	Alchemilla compta	Ehrendorfer (1973)	Complemented with Juillerat et al. (2017)
Alchemilla vulgaris aggr.	aggr.	Alchemilla connivens	Ehrendorfer (1973)	Complemented with Juillerat et al. (2017)
Alchemilla vulgaris aggr.	aggr.	Alchemilla controversa	Ehrendorfer (1973)	Complemented with Juillerat et al. (2017)
Alchemilla vulgaris aggr.	aggr.	Alchemilla coriacea	Ehrendorfer (1973)	Complemented with Juillerat et al. (2017)
Alchemilla vulgaris aggr.	aggr.	Alchemilla crinita	Ehrendorfer (1973)	Complemented with Juillerat et al. (2017)
Alchemilla vulgaris aggr.	aggr.	Alchemilla croatica	Ehrendorfer (1973)	Complemented with Juillerat et al. (2017)
Alchemilla vulgaris aggr.	aggr.	Alchemilla curtiloba	Ehrendorfer (1973)	Complemented with Juillerat et al. (2017)
Alchemilla vulgaris aggr.	aggr.	Alchemilla cymatophylla	Ehrendorfer (1973)	Complemented with Juillerat et al. (2017)
Alchemilla vulgaris aggr.	aggr.	Alchemilla decumbens	Ehrendorfer (1973)	Complemented with Juillerat et al. (2017)
Alchemilla vulgaris aggr.	aggr.	Alchemilla delphiniensis	Ehrendorfer (1973)	Complemented with Juillerat et al. (2017)
Alchemilla vulgaris aggr.	aggr.	Alchemilla demissa	Ehrendorfer (1973)	Complemented with Juillerat et al. (2017)
Alchemilla vulgaris aggr.	aggr.	Alchemilla effusa	Ehrendorfer (1973)	Complemented with Juillerat et al. (2017)
Alchemilla vulgaris aggr.	aggr.	Alchemilla filicaulis	Ehrendorfer (1973)	Complemented with Juillerat et al. (2017)
Alchemilla vulgaris aggr.	aggr.	Alchemilla fissimima	Ehrendorfer (1973)	Complemented with Juillerat et al. (2017)
Alchemilla vulgaris aggr.	aggr.	Alchemilla flavicoma	Ehrendorfer (1973)	Complemented with Juillerat et al. (2017)
Alchemilla vulgaris aggr.	aggr.	Alchemilla frigens	Ehrendorfer (1973)	Complemented with Juillerat et al. (2017)
Alchemilla vulgaris aggr.	aggr.	Alchemilla gaillardiana	Ehrendorfer (1973)	Complemented with Juillerat et al. (2017)
Alchemilla vulgaris aggr.	aggr.	Alchemilla glabra	Ehrendorfer (1973)	Complemented with Juillerat et al. (2017)
Alchemilla vulgaris aggr.	aggr.	Alchemilla glomerulans	Ehrendorfer (1973)	Complemented with Juillerat et al. (2017)
Alchemilla vulgaris aggr.	aggr.	Alchemilla heteropoda	Ehrendorfer (1973)	Complemented with Juillerat et al. (2017)
Alchemilla vulgaris aggr.	aggr.	Alchemilla hirtipes	Ehrendorfer (1973)	Complemented with Juillerat et al. (2017)
Alchemilla vulgaris aggr.	aggr.	Alchemilla impexa	Ehrendorfer (1973)	Complemented with Juillerat et al. (2017)
Alchemilla vulgaris aggr.	aggr.	Alchemilla inconcinna	Ehrendorfer (1973)	Complemented with Juillerat et al. (2017)
Alchemilla vulgaris aggr.	aggr.	Alchemilla lineata	Ehrendorfer (1973)	Complemented with Juillerat et al. (2017)
Alchemilla vulgaris aggr.	aggr.	Alchemilla longana	Ehrendorfer (1973)	Complemented with Juillerat et al. (2017)
Alchemilla vulgaris aggr.	aggr.	Alchemilla longiuscula	Ehrendorfer (1973)	Complemented with Juillerat et al. (2017)
Alchemilla vulgaris aggr.	aggr.	Alchemilla lunaria	Ehrendorfer (1973)	Complemented with Juillerat et al. (2017)
Alchemilla vulgaris aggr.	aggr.	Alchemilla micans	Ehrendorfer (1973)	Complemented with Juillerat et al. (2017)
Alchemilla vulgaris aggr.	aggr.	Alchemilla monticola	Ehrendorfer (1973)	Complemented with Juillerat et al. (2017)
Alchemilla vulgaris aggr.	aggr.	Alchemilla multidens	Ehrendorfer (1973)	Complemented with Juillerat et al. (2017)
Alchemilla vulgaris aggr.	aggr.	Alchemilla niphogeton	Ehrendorfer (1973)	Complemented with Juillerat et al. (2017)
Alchemilla vulgaris aggr.	aggr.	Alchemilla obscura	Ehrendorfer (1973)	Complemented with Juillerat et al. (2017)
Alchemilla vulgaris aggr.	aggr.	Alchemilla obsoleta	Ehrendorfer (1973)	Complemented with Juillerat et al. (2017)
Alchemilla vulgaris aggr.	aggr.	Alchemilla obtusa	Ehrendorfer (1973)	Complemented with Juillerat et al. (2017)
Alchemilla vulgaris aggr.	aggr.	Alchemilla oscensis	Ehrendorfer (1973)	Complemented with Juillerat et al. (2017)
Alchemilla vulgaris aggr.	aggr.	Alchemilla propinqua	Ehrendorfer (1973)	Complemented with Juillerat et al. (2017)
Alchemilla vulgaris aggr.	aggr.	Alchemilla pseudodecumbens	Ehrendorfer (1973)	Complemented with Juillerat et al. (2017)
Alchemilla vulgaris aggr.	aggr.	Alchemilla racemulosa	Ehrendorfer (1973)	Complemented with Juillerat et al. (2017)
Alchemilla vulgaris aggr.	aggr.	Alchemilla reniformis	Ehrendorfer (1973)	Complemented with Juillerat et al. (2017)
Alchemilla vulgaris aggr.	aggr.	Alchemilla rhododendrophila	Ehrendorfer (1973)	Complemented with Juillerat et al. (2017)
Alchemilla vulgaris aggr.	aggr.	Alchemilla rubristipula	Ehrendorfer (1973)	Complemented with Juillerat et al. (2017)
Alchemilla vulgaris aggr.	aggr.	Alchemilla semihirta	Ehrendorfer (1973)	Complemented with Juillerat et al. (2017)
Alchemilla vulgaris aggr.	aggr.	Alchemilla semisecta	Ehrendorfer (1973)	Complemented with Juillerat et al. (2017)
Alchemilla vulgaris aggr.	aggr.	Alchemilla sinuata	Ehrendorfer (1973)	Complemented with Juillerat et al. (2017)
Alchemilla vulgaris aggr.	aggr.	Alchemilla squarrosula	Ehrendorfer (1973)	Complemented with Juillerat et al. (2017)
Alchemilla vulgaris aggr.	aggr.	Alchemilla straminea	Ehrendorfer (1973)	Complemented with Juillerat et al. (2017)
Alchemilla vulgaris aggr.	aggr.	Alchemilla strigosula	Ehrendorfer (1973)	Complemented with Juillerat et al. (2017)
Alchemilla vulgaris aggr.	aggr.	Alchemilla subcrenata	Ehrendorfer (1973)	Complemented with Juillerat et al. (2017)
Alchemilla vulgaris aggr.	aggr.	Alchemilla subglobosa	Ehrendorfer (1973)	Complemented with Juillerat et al. (2017)
Alchemilla vulgaris aggr.	aggr.	Alchemilla tenuis	Ehrendorfer (1973)	Complemented with Juillerat et al. (2017)
Alchemilla vulgaris aggr.	aggr.	Alchemilla tirolensis	Ehrendorfer (1973)	Complemented with Juillerat et al. (2017)
Alchemilla vulgaris aggr.	aggr.	Alchemilla trunciloba	Ehrendorfer (1973)	Complemented with Juillerat et al. (2017)
Alchemilla vulgaris aggr.	aggr.	Alchemilla undulata	Ehrendorfer (1973)	Complemented with Juillerat et al. (2017)
Alchemilla vulgaris aggr.	aggr.	Alchemilla versipila	Ehrendorfer (1973)	Complemented with Juillerat et al. (2017)
Alchemilla vulgaris aggr.	aggr.	Alchemilla weberi	Ehrendorfer (1973)	Complemented with Juillerat et al. (2017)
Alchemilla vulgaris aggr.	aggr.	Alchemilla westermaieri	Ehrendorfer (1973)	Complemented with Juillerat et al. (2017)
Alchemilla vulgaris aggr.	aggr.	Alchemilla wichurae	Ehrendorfer (1973)	Complemented with Juillerat et al. (2017)
Alchemilla vulgaris aggr.	aggr.	Alchemilla xanthochlora	Ehrendorfer (1973)	Complemented with Juillerat et al. (2017)
Alchemilla vulgaris aggr. s.l.	aggr. s.l.	Alchemilla acrodon	Landolt et al. (2010)
Alchemilla vulgaris aggr. s.l.	aggr. s.l.	Alchemilla acutata	Landolt et al. (2010)
Alchemilla vulgaris aggr. s.l.	aggr. s.l.	Alchemilla alneti	Landolt et al. (2010)
Alchemilla vulgaris aggr. s.l.	aggr. s.l.	Alchemilla antiropata	Landolt et al. (2010)
Alchemilla vulgaris aggr. s.l.	aggr. s.l.	Alchemilla bonae	Landolt et al. (2010)
Alchemilla vulgaris aggr. s.l.	aggr. s.l.	Alchemilla canifolia	Landolt et al. (2010)
Alchemilla vulgaris aggr. s.l.	aggr. s.l.	Alchemilla carinthiaca	Landolt et al. (2010)
Alchemilla vulgaris aggr. s.l.	aggr. s.l.	Alchemilla carniolica	Landolt et al. (2010)
Alchemilla vulgaris aggr. s.l.	aggr. s.l.	Alchemilla cataractarum	Landolt et al. (2010)
Alchemilla vulgaris aggr. s.l.	aggr. s.l.	Alchemilla cavillieri	Landolt et al. (2010)
Alchemilla vulgaris aggr. s.l.	aggr. s.l.	Alchemilla curta	Landolt et al. (2010)
Alchemilla vulgaris aggr. s.l.	aggr. s.l.	Alchemilla diversiloba	Landolt et al. (2010)
Alchemilla vulgaris aggr. s.l.	aggr. s.l.	Alchemilla eurystoma	Landolt et al. (2010)
Alchemilla vulgaris aggr. s.l.	aggr. s.l.	Alchemilla firmiana	Landolt et al. (2010)
Alchemilla vulgaris aggr. s.l.	aggr. s.l.	Alchemilla fissa aggr.	Landolt et al. (2010)
Alchemilla vulgaris aggr. s.l.	aggr. s.l.	Alchemilla heptagona	Landolt et al. (2010)
Alchemilla vulgaris aggr. s.l.	aggr. s.l.	Alchemilla hybrida aggr.	Landolt et al. (2010)
Alchemilla vulgaris aggr. s.l.	aggr. s.l.	Alchemilla lasenii	Landolt et al. (2010)
Alchemilla vulgaris aggr. s.l.	aggr. s.l.	Alchemilla leutei	Landolt et al. (2010)
Alchemilla vulgaris aggr. s.l.	aggr. s.l.	Alchemilla longituba	Landolt et al. (2010)
Alchemilla vulgaris aggr. s.l.	aggr. s.l.	Alchemilla matreiensis	Landolt et al. (2010)
Alchemilla vulgaris aggr. s.l.	aggr. s.l.	Alchemilla maureri	Landolt et al. (2010)
Alchemilla vulgaris aggr. s.l.	aggr. s.l.	Alchemilla mollis	Landolt et al. (2010)
Alchemilla vulgaris aggr. s.l.	aggr. s.l.	Alchemilla norica	Landolt et al. (2010)
Alchemilla vulgaris aggr. s.l.	aggr. s.l.	Alchemilla nydeggeriana	Landolt et al. (2010)
Alchemilla vulgaris aggr. s.l.	aggr. s.l.	Alchemilla philonotis	Landolt et al. (2010)
Alchemilla vulgaris aggr. s.l.	aggr. s.l.	Alchemilla platygyria	Landolt et al. (2010)
Alchemilla vulgaris aggr. s.l.	aggr. s.l.	Alchemilla saliceti	Landolt et al. (2010)
Alchemilla vulgaris aggr. s.l.	aggr. s.l.	Alchemilla speciosa	Landolt et al. (2010)
Alchemilla vulgaris aggr. s.l.	aggr. s.l.	Alchemilla splendens aggr.	Landolt et al. (2010)
Alchemilla vulgaris aggr. s.l.	aggr. s.l.	Alchemilla stiriaca	Landolt et al. (2010)
Alchemilla vulgaris aggr. s.l.	aggr. s.l.	Alchemilla vulgaris aggr.	Landolt et al. (2010)
Alisma plantago-aquatica aggr.	aggr.	Alisma gramineum	Ehrendorfer (1973)
Alisma plantago-aquatica aggr.	aggr.	Alisma lanceolatum	Ehrendorfer (1973)
Alisma plantago-aquatica aggr.	aggr.	Alisma plantago-aquatica	Ehrendorfer (1973)
Allium angulosum aggr.	aggr.	Allium angulosum	Landolt et al. (2010)
Allium angulosum aggr.	aggr.	Allium ericetorum	Landolt et al. (2010)
Allium angulosum aggr.	aggr.	Allium kermesinum	Landolt et al. (2010)
Allium angulosum aggr.	aggr.	Allium lusitanicum	Landolt et al. (2010)
Allium lineare aggr.	aggr.	Allium lineare	Landolt et al. (2010)
Allium lineare aggr.	aggr.	Allium strictum	Landolt et al. (2010)
Allium lineare aggr.	aggr.	Allium suaveolens	Landolt et al. (2010)
Allium oleraceum aggr.	aggr.	Allium carinatum	Landolt et al. (2010)
Allium oleraceum aggr.	aggr.	Allium oleraceum	Landolt et al. (2010)
Allium oleraceum aggr.	aggr.	Allium pallens	Landolt et al. (2010)
Allium oleraceum aggr.	aggr.	Allium paniculatum	Landolt et al. (2010)
Allium porrum aggr.	aggr.	Allium ampeloprasum	Landolt et al. (2010)
Allium porrum aggr.	aggr.	Allium porrum	Landolt et al. (2010)
Allium roseum aggr.	aggr.	Allium roseum	Landolt et al. (2010)
Allium roseum aggr.	aggr.	Allium trifoliatum	Landolt et al. (2010)
Allium scorodoprasum aggr.	aggr.	Allium acutiflorum	Landolt et al. (2010)
Allium scorodoprasum aggr.	aggr.	Allium polyanthum	Landolt et al. (2010)
Allium scorodoprasum aggr.	aggr.	Allium rotundum	Landolt et al. (2010)
Allium scorodoprasum aggr.	aggr.	Allium scorodoprasum	Landolt et al. (2010)
Alopecurus geniculatus aggr.	aggr.	Alopecurus aequalis	Landolt et al. (2010)
Alopecurus geniculatus aggr.	aggr.	Alopecurus geniculatus	Landolt et al. (2010)
Althenia filiformis aggr.	aggr.	Althenia filiformis	Euro+Med (2022)
Althenia filiformis aggr.	aggr.	Althenia orientalis	Euro+Med (2022)
Alyssum montanum aggr.	aggr.	Alyssum cuneifolium	Landolt et al. (2010)
Alyssum montanum aggr.	aggr.	Alyssum gmelinii	Landolt et al. (2010)
Alyssum montanum aggr.	aggr.	Alyssum montanum	Landolt et al. (2010)
Alyssum montanum aggr.	aggr.	Alyssum wulfenianum	Landolt et al. (2010)
Amaranthus blitum aggr.	aggr.	Amaranthus blitum	Euro+Med (2022)
Amaranthus blitum aggr.	aggr.	Amaranthus emarginatus	Euro+Med (2022)
Amaranthus hybridus aggr.	aggr.	Amaranthus bouchonii	Euro+Med (2022)
Amaranthus hybridus aggr.	aggr.	Amaranthus cacciatoi	Euro+Med (2022)
Amaranthus hybridus aggr.	aggr.	Amaranthus cruentus	Euro+Med (2022)
Amaranthus hybridus aggr.	aggr.	Amaranthus hybridus	Euro+Med (2022)
Amaranthus hybridus aggr.	aggr.	Amaranthus hypochondriacus	Euro+Med (2022)
Amaranthus hybridus aggr.	aggr.	Amaranthus powellii	Euro+Med (2022)
Amaranthus hybridus aggr.	aggr.	Amaranthus quitensis	Euro+Med (2022)
Amaranthus retroflexus aggr. s.l.	aggr. s.l.	Amaranthus caudatus	Landolt et al. (2010)
Amaranthus retroflexus aggr. s.l.	aggr. s.l.	Amaranthus hybridus aggr.	Landolt et al. (2010)	aggr. > aggr. s.l.
Amaranthus retroflexus aggr. s.l.	aggr. s.l.	Amaranthus retroflexus	Landolt et al. (2010)
Ammannia coccinea aggr.	aggr.	Ammannia auriculata	Landolt et al. (2010)
Ammannia coccinea aggr.	aggr.	Ammannia coccinea	Landolt et al. (2010)
Ammannia coccinea aggr.	aggr.	Ammannia verticillata	Landolt et al. (2010)
Anacamptis laxiflora aggr.	aggr.	Anacamptis laxiflora	Landolt et al. (2010)
Anacamptis laxiflora aggr.	aggr.	Anacamptis palustris	Landolt et al. (2010)
Anagallis arvensis aggr.	aggr.	Anagallis arvensis	Landolt et al. (2010)
Anagallis arvensis aggr.	aggr.	Anagallis foemina	Landolt et al. (2010)
Androsace alpina aggr.	aggr.	Androsace alpina	Landolt et al. (2010)
Androsace alpina aggr.	aggr.	Androsace brevis	Landolt et al. (2010)
Androsace alpina aggr.	aggr.	Androsace hausmannii	Landolt et al. (2010)
Androsace alpina aggr.	aggr.	Androsace pubescens	Landolt et al. (2010)
Androsace alpina aggr.	aggr.	Androsace wulfeniana	Landolt et al. (2010)
Androsace carnea aggr.	aggr.	Androsace adfinis	Ehrendorfer (1973)	Added A. adfinis
Androsace carnea aggr.	aggr.	Androsace brigantiaca	Ehrendorfer (1973)	Added A. adfinis
Androsace carnea aggr.	aggr.	Androsace carnea	Ehrendorfer (1973)	Added A. adfinis
Androsace carnea aggr.	aggr.	Androsace halleri	Ehrendorfer (1973)	Added A. adfinis
Androsace halleri aggr. s.l.	aggr. s.l.	Androsace carnea aggr.	Landolt et al. (2010)
Androsace halleri aggr. s.l.	aggr. s.l.	Androsace obtusifolia	Landolt et al. (2010)
Androsace septentrionalis aggr.	aggr.	Androsace chaixii	Landolt et al. (2010)
Androsace septentrionalis aggr.	aggr.	Androsace septentrionalis	Landolt et al. (2010)
Anemone hortensis aggr.	aggr.	Anemone hortensis	[ad hoc]
Anemone hortensis aggr.	aggr.	Anemone pavonina	[ad hoc]
Anisantha diandra aggr.	aggr.	Anisantha diandra	Ehrendorfer (1973)	Genus changed
Anisantha diandra aggr.	aggr.	Anisantha rigida	Ehrendorfer (1973)	Genus changed
Anisantha madritensis aggr. s.l.	aggr. s.l.	Anisantha diandra aggr.	Landolt et al. (2010)
Anisantha madritensis aggr. s.l.	aggr. s.l.	Anisantha madritensis	Landolt et al. (2010)
Anisantha madritensis aggr. s.l.	aggr. s.l.	Anisantha rubens	Landolt et al. (2010)
Anthemis arvensis aggr.	aggr.	Anthemis arvensis	Landolt et al. (2010)
Anthemis arvensis aggr.	aggr.	Anthemis ruthenica	Landolt et al. (2010)
Anthemis punctata aggr.	aggr.	Anthemis cupaniana	Euro+Med (2022)
Anthemis punctata aggr.	aggr.	Anthemis ismelia	Euro+Med (2022)
Anthemis punctata aggr.	aggr.	Anthemis punctata	Euro+Med (2022)
Anthoxanthum odoratum aggr.	aggr.	Anthoxanthum alpinum	Juillerat et al. (2017)
Anthoxanthum odoratum aggr.	aggr.	Anthoxanthum odoratum	Juillerat et al. (2017)
Anthriscus sylvestris aggr.	aggr.	Anthriscus nitidus	Ehrendorfer (1973)
Anthriscus sylvestris aggr.	aggr.	Anthriscus sylvestris	Ehrendorfer (1973)
Antirrhinum majus aggr.	aggr.	Antirrhinum latifolium	Ehrendorfer (1973)
Antirrhinum majus aggr.	aggr.	Antirrhinum majus	Ehrendorfer (1973)
Aphanes arvensis aggr.	aggr.	Aphanes arvensis	Landolt et al. (2010)
Aphanes arvensis aggr.	aggr.	Aphanes australis	Landolt et al. (2010)
Aphanes arvensis aggr.	aggr.	Aphanes microcarpa	Landolt et al. (2010)
Aphanes arvensis aggr.	aggr.	Aphanes minutiflora	Landolt et al. (2010)
Aquilegia einseleana aggr.	aggr.	Aquilegia bertolonii	Landolt et al. (2010)
Aquilegia einseleana aggr.	aggr.	Aquilegia einseleana	Landolt et al. (2010)
Aquilegia vulgaris aggr.	aggr.	Aquilegia atrata	Ehrendorfer (1973)	Added A. subscaposa
Aquilegia vulgaris aggr.	aggr.	Aquilegia nigricans	Ehrendorfer (1973)	Added A. subscaposa
Aquilegia vulgaris aggr.	aggr.	Aquilegia subscaposa	Ehrendorfer (1973)	Added A. subscaposa
Aquilegia vulgaris aggr.	aggr.	Aquilegia vulgaris	Ehrendorfer (1973)	Added A. subscaposa
Arabis hirsuta aggr.	aggr.	Arabis allionii	Landolt et al. (2010)
Arabis hirsuta aggr.	aggr.	Arabis ciliata	Landolt et al. (2010)
Arabis hirsuta aggr.	aggr.	Arabis hirsuta	Landolt et al. (2010)
Arabis hirsuta aggr.	aggr.	Arabis nemorensis	Landolt et al. (2010)
Arabis hirsuta aggr.	aggr.	Arabis planisiliqua	Landolt et al. (2010)
Arabis hirsuta aggr.	aggr.	Arabis sagittata	Landolt et al. (2010)
Arabis hirsuta aggr.	aggr.	Arabis sudetica	Landolt et al. (2010)
Arabis pumila aggr.	aggr.	Arabis pumila	[ad hoc]
Arabis pumila aggr.	aggr.	Arabis pumila	[ad hoc]
Arabis pumila aggr.	aggr.	Arabis stellulata	[ad hoc]
Arabis pumila aggr.	aggr.	Arabis stellulata	[ad hoc]
Arctium lappa aggr. s.l.	aggr. s.l.	Arctium lappa	Landolt et al. (2010)
Arctium lappa aggr. s.l.	aggr. s.l.	Arctium minus aggr.	Landolt et al. (2010)
Arctium minus aggr.	aggr.	Arctium minus	Ehrendorfer (1973)
Arctium minus aggr.	aggr.	Arctium nemorosus	Ehrendorfer (1973)
Arenaria ciliata aggr.	aggr.	Arenaria ciliata	Juillerat et al. (2017)
Arenaria ciliata aggr.	aggr.	Arenaria gothica	Juillerat et al. (2017)
Arenaria ciliata aggr.	aggr.	Arenaria multicaulis	Juillerat et al. (2017)
Arenaria serpyllifolia aggr.	aggr.	Arenaria leptoclados	Ehrendorfer (1973)
Arenaria serpyllifolia aggr.	aggr.	Arenaria marschlinsii	Ehrendorfer (1973)
Arenaria serpyllifolia aggr.	aggr.	Arenaria serpyllifolia	Ehrendorfer (1973)
Aristolochia pallida aggr.	aggr.	Aristolochia lutea	Landolt et al. (2010)
Aristolochia pallida aggr.	aggr.	Aristolochia pallida	Landolt et al. (2010)
Armeria arenaria aggr.	aggr.	Armeria alliacea	Landolt et al. (2010)
Armeria arenaria aggr.	aggr.	Armeria arenaria	Landolt et al. (2010)
Armeria maritima aggr.	aggr.	Armeria alpina	Landolt et al. (2010)
Armeria maritima aggr.	aggr.	Armeria maritima	Landolt et al. (2010)
Artemisia campestris aggr.	aggr.	Artemisia alpina	Landolt et al. (2010)
Artemisia campestris aggr.	aggr.	Artemisia campestris	Landolt et al. (2010)
Artemisia genipi aggr.	aggr.	Artemisia genipi	Landolt et al. (2010)
Artemisia genipi aggr.	aggr.	Artemisia nitida	Landolt et al. (2010)
Artemisia genipi aggr.	aggr.	Artemisia nivalis	Landolt et al. (2010)
Artemisia genipi aggr.	aggr.	Artemisia umbelliformis	Landolt et al. (2010)
Artemisia vulgaris aggr.	aggr.	Artemisia verlotiorum	Ehrendorfer (1973)
Artemisia vulgaris aggr.	aggr.	Artemisia vulgaris	Ehrendorfer (1973)
Arum maculatum aggr.	aggr.	Arum cylindraceum	Ehrendorfer (1973)
Arum maculatum aggr.	aggr.	Arum italicum	Ehrendorfer (1973)
Arum maculatum aggr.	aggr.	Arum maculatum	Ehrendorfer (1973)
Asperula cynanchica aggr.	aggr.	Asperula aristata	Landolt et al. (2010)
Asperula cynanchica aggr.	aggr.	Asperula cynanchica	Landolt et al. (2010)
Asperula cynanchica aggr.	aggr.	Asperula neilreichii	Landolt et al. (2010)
Asperula cynanchica aggr.	aggr.	Asperula rupicola	Landolt et al. (2010)
Asphodelus albus aggr.	aggr.	Asphodelus albus	Landolt et al. (2010)
Asphodelus albus aggr.	aggr.	Asphodelus macrocarpus	Landolt et al. (2010)
Asplenium adulterinum aggr.	aggr.	Asplenium adulterinum	Landolt et al. (2010)
Asplenium adulterinum aggr.	aggr.	Asplenium presolanense	Landolt et al. (2010)
Asplenium fontanum aggr.	aggr.	Asplenium fontanum	Ehrendorfer (1973)
Asplenium fontanum aggr.	aggr.	Asplenium foreziense	Ehrendorfer (1973)
Asplenium viride aggr.	aggr.	Asplenium jahandiezii	Landolt et al. (2010)
Asplenium viride aggr.	aggr.	Asplenium viride	Landolt et al. (2010)
Astragalus sect. Acmothrix	sect.	Astragalus fragrans	Euro+Med (2022)
Astragalus sect. Acmothrix	sect.	Astragalus juzepczukii	Euro+Med (2022)
Astragalus sect. Acmothrix	sect.	Astragalus levieri	Euro+Med (2022)
Astragalus sect. Caprini	sect.	Astragalus brachystachys	Euro+Med (2022)
Astragalus sect. Caprini	sect.	Astragalus filamentosus	Euro+Med (2022)
Astragalus sect. Caprini	sect.	Astragalus kirpicznikovii	Euro+Med (2022)
Astragalus sect. Caprini	sect.	Astragalus pinetorum	Euro+Med (2022)
Astragalus sect. Caprini	sect.	Astragalus pseudoutriger	Euro+Med (2022)
Astragalus sect. Caprini	sect.	Astragalus schemachensis	Euro+Med (2022)
Astragalus sect. Craccina	sect.	Astragalus arenarius	Euro+Med (2022)
Astragalus sect. Craccina	sect.	Astragalus austriacus	Euro+Med (2022)
Astragalus sect. Craccina	sect.	Astragalus clerceanus	Euro+Med (2022)
Astragalus sect. Craccina	sect.	Astragalus filiformis	Euro+Med (2022)
Astragalus sect. Craccina	sect.	Astragalus sulcatus	Euro+Med (2022)
Astragalus sect. Craccina	sect.	Astragalus tenuifolius	Euro+Med (2022)
Astragalus sect. Cystium	sect.	Astragalus biebersteinii	Euro+Med (2022)
Astragalus sect. Cystium	sect.	Astragalus massalskyi	Euro+Med (2022)
Astragalus sect. Cystium	sect.	Astragalus physodes	Euro+Med (2022)
Astragalus sect. Cystium	sect.	Astragalus suprapilosus	Euro+Med (2022)
Astragalus sect. Eremophysa	sect.	Astragalus kahiricus	Euro+Med (2022)
Astragalus sect. Eremophysa	sect.	Astragalus lehmannianus	Euro+Med (2022)
Astragalus sect. Hemiphragmium	sect.	Astragalus australis	Euro+Med (2022)
Astragalus sect. Hemiphragmium	sect.	Astragalus gorczakovskii	Euro+Med (2022)
Astragalus sect. Hemiphragmium	sect.	Astragalus gorodkovii	Euro+Med (2022)
Astragalus sect. Heterodontus	sect.	Astragalus contortuplicatus	Euro+Med (2022)
Astragalus sect. Heterodontus	sect.	Astragalus guttatus	Euro+Med (2022)
Astragalus sect. Heterodontus	sect.	Astragalus stevenianus	Euro+Med (2022)
Astragalus sect. Hololeuce	sect.	Astragalus alyssoides	Euro+Med (2022)
Astragalus sect. Hololeuce	sect.	Astragalus bicolor	Euro+Med (2022)
Astragalus sect. Hololeuce	sect.	Astragalus dzebrailicus	Euro+Med (2022)
Astragalus sect. Hololeuce	sect.	Astragalus gjunaicus	Euro+Med (2022)
Astragalus sect. Hololeuce	sect.	Astragalus hirsutus	Euro+Med (2022)
Astragalus sect. Hololeuce	sect.	Astragalus hyalolepis	Euro+Med (2022)
Astragalus sect. Hololeuce	sect.	Astragalus incertus	Euro+Med (2022)
Astragalus sect. Hololeuce	sect.	Astragalus onobrychioides	Euro+Med (2022)
Astragalus sect. Hololeuce	sect.	Astragalus zuvanticus	Euro+Med (2022)
Astragalus sect. Hymenostegis	sect.	Astragalus hirticalyx	Euro+Med (2022)
Astragalus sect. Hymenostegis	sect.	Astragalus hymenocystis	Euro+Med (2022)
Astragalus sect. Hymenostegis	sect.	Astragalus lagopoides	Euro+Med (2022)
Astragalus sect. Hymenostegis	sect.	Astragalus persicus	Euro+Med (2022)
Astragalus sect. Hymenostegis	sect.	Astragalus tanae	Euro+Med (2022)
Astragalus sect. Hymenostegis	sect.	Astragalus uraniolimneus	Euro+Med (2022)
Astragalus sect. Hymenostegis	sect.	Astragalus velenowskyi	Euro+Med (2022)
Astragalus sect. Hymenostegis	sect.	Astragalus zohrabi	Euro+Med (2022)
Astragalus sect. Hypoglottoidei	sect.	Astragalus brachypetalus	Euro+Med (2022)
Astragalus sect. Hypoglottoidei	sect.	Astragalus vexillaris	Euro+Med (2022)
Astragalus sect. Laguropsis	sect.	Astragalus calycinus	Euro+Med (2022)
Astragalus sect. Laguropsis	sect.	Astragalus iljinii	Euro+Med (2022)
Astragalus sect. Laguropsis	sect.	Astragalus subsecundus	Euro+Med (2022)
Astragalus sect. Laxiflori	sect.	Astragalus bracteosus	Euro+Med (2022)
Astragalus sect. Laxiflori	sect.	Astragalus chlorostegius	Euro+Med (2022)
Astragalus sect. Malacothrix	sect.	Astragalus agassii	Euro+Med (2022)
Astragalus sect. Malacothrix	sect.	Astragalus albanicus	Euro+Med (2022)
Astragalus sect. Malacothrix	sect.	Astragalus aznabjurticus	Euro+Med (2022)
Astragalus sect. Malacothrix	sect.	Astragalus eriocarpus	Euro+Med (2022)
Astragalus sect. Malacothrix	sect.	Astragalus eriopodus	Euro+Med (2022)
Astragalus sect. Malacothrix	sect.	Astragalus eucosmus	Euro+Med (2022)
Astragalus sect. Malacothrix	sect.	Astragalus eugenii	Euro+Med (2022)
Astragalus sect. Malacothrix	sect.	Astragalus griseus	Euro+Med (2022)
Astragalus sect. Malacothrix	sect.	Astragalus kabristanicus	Euro+Med (2022)
Astragalus sect. Malacothrix	sect.	Astragalus macrostachys	Euro+Med (2022)
Astragalus sect. Malacothrix	sect.	Astragalus macrourus	Euro+Med (2022)
Astragalus sect. Malacothrix	sect.	Astragalus megricus	Euro+Med (2022)
Astragalus sect. Malacothrix	sect.	Astragalus podocarpus	Euro+Med (2022)
Astragalus sect. Malacothrix	sect.	Astragalus rzaevii	Euro+Med (2022)
Astragalus sect. Malacothrix	sect.	Astragalus sachanewii	Euro+Med (2022)
Astragalus sect. Malacothrix	sect.	Astragalus schachbuzensis	Euro+Med (2022)
Astragalus sect. Malacothrix	sect.	Astragalus takhtadzhjanii	Euro+Med (2022)
Astragalus sect. Malacothrix	sect.	Astragalus tauricolus	Euro+Med (2022)
Astragalus sect. Myobroma	sect.	Astragalus aegobromus	Euro+Med (2022)
Astragalus sect. Myobroma	sect.	Astragalus angustiflorus	Euro+Med (2022)
Astragalus sect. Myobroma	sect.	Astragalus bakuensis	Euro+Med (2022)
Astragalus sect. Myobroma	sect.	Astragalus buchtormensis	Euro+Med (2022)
Astragalus sect. Myobroma	sect.	Astragalus exscapus	Euro+Med (2022)
Astragalus sect. Myobroma	sect.	Astragalus fabaceus	Euro+Med (2022)
Astragalus sect. Myobroma	sect.	Astragalus flexus	Euro+Med (2022)
Astragalus sect. Myobroma	sect.	Astragalus kungurensis	Euro+Med (2022)
Astragalus sect. Myobroma	sect.	Astragalus longipetalus	Euro+Med (2022)
Astragalus sect. Myobroma	sect.	Astragalus polyphyllus	Euro+Med (2022)
Astragalus sect. Myobroma	sect.	Astragalus utriger	Euro+Med (2022)
Astragalus sect. Myobroma	sect.	Astragalus wolgensis	Euro+Med (2022)
Astragalus sect. Ornithopodium	sect.	Astragalus bylowae	Euro+Med (2022)
Astragalus sect. Ornithopodium	sect.	Astragalus jodostachys	Euro+Med (2022)
Astragalus sect. Ornithopodium	sect.	Astragalus ornithopodioides	Euro+Med (2022)
Astragalus sect. Acanthophace	sect.	Astragalus beckerianus	Euro+Med (2022)
Astragalus sect. Acanthophace	sect.	Astragalus coarctatus	Euro+Med (2022)
Astragalus sect. Acanthophace	sect.	Astragalus euoplus	Euro+Med (2022)
Astragalus sect. Acanthophace	sect.	Astragalus leiophyllus	Euro+Med (2022)
Astragalus sect. Acanthophace	sect.	Astragalus ochrochlorus	Euro+Med (2022)
Astragalus sect. Acanthophace	sect.	Astragalus sahendi	Euro+Med (2022)
Astragalus sect. Acanthophace	sect.	Astragalus sangesuricus	Euro+Med (2022)
Astragalus sect. Alopecuroidei	sect.	Astragalus alopecurus	Euro+Med (2022)
Astragalus sect. Alopecuroidei	sect.	Astragalus echinops	Euro+Med (2022)
Astragalus sect. Alopecuroidei	sect.	Astragalus macrocephalus	Euro+Med (2022)
Astragalus sect. Alopecuroidei	sect.	Astragalus megalotropis	Euro+Med (2022)
Astragalus sect. Alopecuroidei	sect.	Astragalus oocephalus	Euro+Med (2022)
Astragalus sect. Alopecuroidei	sect.	Astragalus petropolitanus	Euro+Med (2022)
Astragalus sect. Alopecuroidei	sect.	Astragalus ponticus	Euro+Med (2022)
Astragalus sect. Alopecuroidei	sect.	Astragalus vulpinus	Euro+Med (2022)
Astragalus sect. Ammodendron	sect.	Astragalus ammodendron	Euro+Med (2022)
Astragalus sect. Ammodendron	sect.	Astragalus camelorum	Euro+Med (2022)
Astragalus sect. Ammodendron	sect.	Astragalus hyrcanus	Euro+Med (2022)
Astragalus sect. Ammodendron	sect.	Astragalus igniarius	Euro+Med (2022)
Astragalus sect. Ammodendron	sect.	Astragalus karakugensis	Euro+Med (2022)
Astragalus sect. Ankylotus	sect.	Astragalus ankylotus	Euro+Med (2022)
Astragalus sect. Ankylotus	sect.	Astragalus commixtus	Euro+Med (2022)
Astragalus sect. Ankylotus	sect.	Astragalus hamrinensis	Euro+Med (2022)
Astragalus sect. Ankylotus	sect.	Astragalus stalinskyi	Euro+Med (2022)
Astragalus sect. Cystodes	sect.	Astragalus albicaulis	Euro+Med (2022)
Astragalus sect. Cystodes	sect.	Astragalus glaucus	Euro+Med (2022)
Astragalus sect. Cystodes	sect.	Astragalus pseudoglaucus	Euro+Med (2022)
Astragalus sect. Cystodes	sect.	Astragalus zingeri	Euro+Med (2022)
Astragalus sect. Erioceras	sect.	Astragalus arcuatus	Euro+Med (2022)
Astragalus sect. Erioceras	sect.	Astragalus reduncus	Euro+Med (2022)
Astragalus sect. Erionotus	sect.	Astragalus dasyanthus	Euro+Med (2022)
Astragalus sect. Erionotus	sect.	Astragalus tanaiticus	Euro+Med (2022)
Astragalus sect. Glycyphyllus	sect.	Astragalus fraxinifolius	Euro+Med (2022)
Astragalus sect. Glycyphyllus	sect.	Astragalus glycyphylloides	Euro+Med (2022)
Astragalus sect. Glycyphyllus	sect.	Astragalus glycyphyllos	Euro+Med (2022)
Astragalus sect. Glycyphyllus	sect.	Astragalus magnificus	Euro+Med (2022)
Astragalus sect. Grammocalyx	sect.	Astragalus gezeldarensis	Euro+Med (2022)
Astragalus sect. Grammocalyx	sect.	Astragalus grammocalyx	Euro+Med (2022)
Astragalus sect. Grammocalyx	sect.	Astragalus lineatus	Euro+Med (2022)
Astragalus sect. Halicacabus	sect.	Astragalus daghestanicus	Euro+Med (2022)
Astragalus sect. Halicacabus	sect.	Astragalus kaghysmani	Euro+Med (2022)
Astragalus sect. Halicacabus	sect.	Astragalus karakuschensis	Euro+Med (2022)
Astragalus sect. Halicacabus	sect.	Astragalus mesites	Euro+Med (2022)
Astragalus sect. Harpilobus	sect.	Astragalus campylorrhynchus	Euro+Med (2022)
Astragalus sect. Harpilobus	sect.	Astragalus corrugatus	Euro+Med (2022)
Astragalus sect. Harpilobus	sect.	Astragalus harpilobus	Euro+Med (2022)
Astragalus sect. Harpilobus	sect.	Astragalus reticulatus	Euro+Med (2022)
Astragalus sect. Hypoglottidei	sect.	Astragalus bachmarensis	Euro+Med (2022)
Astragalus sect. Hypoglottidei	sect.	Astragalus chordorrhizus	Euro+Med (2022)
Astragalus sect. Hypoglottidei	sect.	Astragalus cicer	Euro+Med (2022)
Astragalus sect. Hypoglottidei	sect.	Astragalus ciceroides	Euro+Med (2022)
Astragalus sect. Hypoglottidei	sect.	Astragalus danicus	Euro+Med (2022)
Astragalus sect. Hypoglottidei	sect.	Astragalus flexicaulis	Euro+Med (2022)
Astragalus sect. Hypoglottidei	sect.	Astragalus freynii	Euro+Med (2022)
Astragalus sect. Hypoglottidei	sect.	Astragalus hirtulus	Euro+Med (2022)
Astragalus sect. Hypoglottidei	sect.	Astragalus humifusus	Euro+Med (2022)
Astragalus sect. Hypoglottidei	sect.	Astragalus kubensis	Euro+Med (2022)
Astragalus sect. Hypoglottidei	sect.	Astragalus oreades	Euro+Med (2022)
Astragalus sect. Hypoglottidei	sect.	Astragalus ovatus	Euro+Med (2022)
Astragalus sect. Hypoglottidei	sect.	Astragalus raddeanus	Euro+Med (2022)
Astragalus sect. Hypoglottidei	sect.	Astragalus supinus	Euro+Med (2022)
Astragalus sect. Hypoglottidei	sect.	Astragalus tshegemensis	Euro+Med (2022)
Astragalus sect. Hypoglottidei	sect.	Astragalus vavilovii	Euro+Med (2022)
Astragalus sect. Megalocystis	sect.	Astragalus szovitsii	Euro+Med (2022)
Astragalus sect. Megalocystis	sect.	Astragalus tortuosus	Euro+Med (2022)
Astragalus sect. Onobrychium	sect.	Astragalus aduncus	Euro+Med (2022)
Astragalus sect. Onobrychium	sect.	Astragalus adzharicus	Euro+Med (2022)
Astragalus sect. Onobrychium	sect.	Astragalus arguricus	Euro+Med (2022)
Astragalus sect. Onobrychium	sect.	Astragalus aspindzicus	Euro+Med (2022)
Astragalus sect. Onobrychium	sect.	Astragalus bungeanus	Euro+Med (2022)
Astragalus sect. Onobrychium	sect.	Astragalus cancellatus	Euro+Med (2022)
Astragalus sect. Onobrychium	sect.	Astragalus captiosus	Euro+Med (2022)
Astragalus sect. Onobrychium	sect.	Astragalus goktschaicus	Euro+Med (2022)
Astragalus sect. Onobrychium	sect.	Astragalus hajastanus	Euro+Med (2022)
Astragalus sect. Onobrychium	sect.	Astragalus kadshorensis	Euro+Med (2022)
Astragalus sect. Onobrychium	sect.	Astragalus karputanus	Euro+Med (2022)
Astragalus sect. Onobrychium	sect.	Astragalus lasioglottis	Euro+Med (2022)
Astragalus sect. Onobrychium	sect.	Astragalus lunatus	Euro+Med (2022)
Astragalus sect. Onobrychium	sect.	Astragalus mossulensis	Euro+Med (2022)
Astragalus sect. Onobrychium	sect.	Astragalus onobrychis	Euro+Med (2022)
Astragalus sect. Onobrychium	sect.	Astragalus onspicuus	Euro+Med (2022)
Astragalus sect. Onobrychium	sect.	Astragalus sevangensis	Euro+Med (2022)
Astragalus sect. Onobrychium	sect.	Astragalus shagalensis	Euro+Med (2022)
Astragalus sect. Onobrychium	sect.	Astragalus xylorrhizus	Euro+Med (2022)
Astragalus sect. Orobella	sect.	Astragalus brachytropis	Euro+Med (2022)
Astragalus sect. Orobella	sect.	Astragalus norvegicus	Euro+Med (2022)
Astragalus sect. Oxyglottis	sect.	Astragalus camptoceras	Euro+Med (2022)
Astragalus sect. Oxyglottis	sect.	Astragalus oxyglottis	Euro+Med (2022)
Astragalus sect. Oxyglottis	sect.	Astragalus persepolitanus	Euro+Med (2022)
Astragalus sect. Oxyglottis	sect.	Astragalus sinaicus	Euro+Med (2022)
Astragalus sect. Oxyglottis	sect.	Astragalus triradiatus	Euro+Med (2022)
Astragalus sect. Proselius	sect.	Astragalus achundovii	Euro+Med (2022)
Astragalus sect. Proselius	sect.	Astragalus alexandrii	Euro+Med (2022)
Astragalus sect. Proselius	sect.	Astragalus ancistrocarpus	Euro+Med (2022)
Astragalus sect. Proselius	sect.	Astragalus brachycarpus	Euro+Med (2022)
Astragalus sect. Proselius	sect.	Astragalus buschiorum	Euro+Med (2022)
Astragalus sect. Proselius	sect.	Astragalus campylosema	Euro+Med (2022)
Astragalus sect. Proselius	sect.	Astragalus charadzeae	Euro+Med (2022)
Astragalus sect. Proselius	sect.	Astragalus cinereus	Euro+Med (2022)
Astragalus sect. Proselius	sect.	Astragalus coelestis	Euro+Med (2022)
Astragalus sect. Proselius	sect.	Astragalus cuscutae	Euro+Med (2022)
Astragalus sect. Proselius	sect.	Astragalus cyri	Euro+Med (2022)
Astragalus sect. Proselius	sect.	Astragalus demetrii	Euro+Med (2022)
Astragalus sect. Proselius	sect.	Astragalus fedorovii	Euro+Med (2022)
Astragalus sect. Proselius	sect.	Astragalus frickii	Euro+Med (2022)
Astragalus sect. Proselius	sect.	Astragalus fuliginosus	Euro+Med (2022)
Astragalus sect. Proselius	sect.	Astragalus kazbeki	Euro+Med (2022)
Astragalus sect. Proselius	sect.	Astragalus latifolius	Euro+Med (2022)
Astragalus sect. Proselius	sect.	Astragalus longicuspis	Euro+Med (2022)
Astragalus sect. Proselius	sect.	Astragalus monspessulanus	Euro+Med (2022)
Astragalus sect. Proselius	sect.	Astragalus montis-aquilis	Euro+Med (2022)
Astragalus sect. Proselius	sect.	Astragalus ordubadensis	Euro+Med (2022)
Astragalus sect. Proselius	sect.	Astragalus polygala	Euro+Med (2022)
Astragalus sect. Proselius	sect.	Astragalus prilipkoanus	Euro+Med (2022)
Astragalus sect. Proselius	sect.	Astragalus refractus	Euro+Med (2022)
Astragalus sect. Proselius	sect.	Astragalus robustus	Euro+Med (2022)
Astragalus sect. Proselius	sect.	Astragalus rostratus	Euro+Med (2022)
Astragalus sect. Proselius	sect.	Astragalus salatavicus	Euro+Med (2022)
Astragalus sect. Proselius	sect.	Astragalus sanguinolentus	Euro+Med (2022)
Astragalus sect. Proselius	sect.	Astragalus supervisus	Euro+Med (2022)
Astragalus sect. Proselius	sect.	Astragalus tigridis	Euro+Med (2022)
Astragalus sect. Proselius	sect.	Astragalus vardziae	Euro+Med (2022)
Astragalus sect. Proselius	sect.	Astragalus zangelanus	Euro+Med (2022)
Astragalus sect. Sesamei	sect.	Astragalus asterias	Euro+Med (2022)
Astragalus sect. Sesamei	sect.	Astragalus filicaulis	Euro+Med (2022)
Astragalus sect. Sesamei	sect.	Astragalus tribuloides	Euro+Med (2022)
Astragalus sect. Stereothrix	sect.	Astragalus barbatus	Euro+Med (2022)
Astragalus sect. Stereothrix	sect.	Astragalus capito	Euro+Med (2022)
Astragalus sect. Stereothrix	sect.	Astragalus saganlugensis	Euro+Med (2022)
Astragalus sect. Stereothrix	sect.	Astragalus setosulus	Euro+Med (2022)
Astragalus sect. Stereothrix	sect.	Astragalus sphaeranthus	Euro+Med (2022)
Astragalus sect. Trachycercis	sect.	Astragalus barnassari	Euro+Med (2022)
Astragalus sect. Trachycercis	sect.	Astragalus chalilovii	Euro+Med (2022)
Astragalus sect. Trachycercis	sect.	Astragalus dolichophyllus	Euro+Med (2022)
Astragalus sect. Trachycercis	sect.	Astragalus erivanensis	Euro+Med (2022)
Astragalus sect. Trachycercis	sect.	Astragalus humilis	Euro+Med (2022)
Astragalus sect. Trachycercis	sect.	Astragalus rupifragus	Euro+Med (2022)
Astragalus sect. Trachycercis	sect.	Astragalus teberdensis	Euro+Med (2022)
Astragalus sect. Trachycercis	sect.	Astragalus testiculatus	Euro+Med (2022)
Astragalus sect. Xiphidium	sect.	Astragalus abruptus	Euro+Med (2022)
Astragalus sect. Xiphidium	sect.	Astragalus argyroides	Euro+Med (2022)
Astragalus sect. Xiphidium	sect.	Astragalus aucheri	Euro+Med (2022)
Astragalus sect. Xiphidium	sect.	Astragalus balkaricus	Euro+Med (2022)
Astragalus sect. Xiphidium	sect.	Astragalus brachylobus	Euro+Med (2022)
Astragalus sect. Xiphidium	sect.	Astragalus corniculatus	Euro+Med (2022)
Astragalus sect. Xiphidium	sect.	Astragalus cornutus	Euro+Med (2022)
Astragalus sect. Xiphidium	sect.	Astragalus fissuralis	Euro+Med (2022)
Astragalus sect. Xiphidium	sect.	Astragalus haesitabundus	Euro+Med (2022)
Astragalus sect. Xiphidium	sect.	Astragalus husseinovii	Euro+Med (2022)
Astragalus sect. Xiphidium	sect.	Astragalus igoschinae	Euro+Med (2022)
Astragalus sect. Xiphidium	sect.	Astragalus karelinianus	Euro+Med (2022)
Astragalus sect. Xiphidium	sect.	Astragalus lussiae	Euro+Med (2022)
Astragalus sect. Xiphidium	sect.	Astragalus macropus	Euro+Med (2022)
Astragalus sect. Xiphidium	sect.	Astragalus maraziensis	Euro+Med (2022)
Astragalus sect. Xiphidium	sect.	Astragalus nitens	Euro+Med (2022)
Astragalus sect. Xiphidium	sect.	Astragalus pallescens	Euro+Med (2022)
Astragalus sect. Xiphidium	sect.	Astragalus sachokianus	Euro+Med (2022)
Astragalus sect. Xiphidium	sect.	Astragalus subuliformis	Euro+Med (2022)
Astragalus sect. Xiphidium	sect.	Astragalus temirensis	Euro+Med (2022)
Astragalus sect. Xiphidium	sect.	Astragalus trachoniticus	Euro+Med (2022)
Astragalus sect. Xiphidium	sect.	Astragalus varius	Euro+Med (2022)
Astragalus sect. Xiphidium	sect.	Astragalus viridiformis	Euro+Med (2022)
Astragalus sect. Xiphidium	sect.	Astragalus viridis	Euro+Med (2022)
Astrantia bavarica aggr.	aggr.	Astrantia bavarica	Landolt et al. (2010)
Astrantia bavarica aggr.	aggr.	Astrantia carniolica	Landolt et al. (2010)
Athamanta cretensis aggr.	aggr.	Athamanta cretensis	Ehrendorfer (1973)
Athamanta cretensis aggr.	aggr.	Athamanta vestina	Ehrendorfer (1973)
Athyrium filix-femina aggr.	aggr.	Athyrium distentifolium	Landolt et al. (2010)
Athyrium filix-femina aggr.	aggr.	Athyrium filix-femina	Landolt et al. (2010)
Atractylis humilis aggr.	aggr.	Atractylis caespitosa	[ad hoc]
Atractylis humilis aggr.	aggr.	Atractylis humilis	[ad hoc]
Atriplex hastata aggr. s.l.	aggr. s.l.	Atriplex calotheca	Ehrendorfer (1973)	aggr. > aggr. s.l.
Atriplex hastata aggr. s.l.	aggr. s.l.	Atriplex glabriuscula	Ehrendorfer (1973)	aggr. > aggr. s.l.
Atriplex hastata aggr. s.l.	aggr. s.l.	Atriplex longipes aggr.	Ehrendorfer (1973)	aggr. > aggr. s.l.
Atriplex hastata aggr. s.l.	aggr. s.l.	Atriplex prostrata	Ehrendorfer (1973)	aggr. > aggr. s.l.
Atriplex longipes aggr.	aggr.	Atriplex longipes	Euro+Med (2022)
Atriplex longipes aggr.	aggr.	Atriplex nudicaulis	Euro+Med (2022)
Atriplex longipes aggr.	aggr.	Atriplex praecox	Euro+Med (2022)
Atriplex patula aggr.	aggr.	Atriplex hortensis	Landolt et al. (2010)
Atriplex patula aggr.	aggr.	Atriplex micrantha	Landolt et al. (2010)
Atriplex patula aggr.	aggr.	Atriplex oblongifolia	Landolt et al. (2010)
Atriplex patula aggr.	aggr.	Atriplex patula	Landolt et al. (2010)
Atriplex patula aggr.	aggr.	Atriplex prostrata	Landolt et al. (2010)
Atriplex patula aggr.	aggr.	Atriplex sagittata	Landolt et al. (2010)
Atriplex tatarica aggr.	aggr.	Atriplex laciniata	Euro+Med (2022)
Atriplex tatarica aggr.	aggr.	Atriplex lasiantha	Euro+Med (2022)
Atriplex tatarica aggr.	aggr.	Atriplex recurva	Euro+Med (2022)
Atriplex tatarica aggr.	aggr.	Atriplex tatarica	Euro+Med (2022)
Atriplex tatarica aggr.	aggr.	Atriplex tornabenei	Euro+Med (2022)
Atriplex tatarica aggr.	aggr.	Atriplex zahlensis	Euro+Med (2022)
Avena fatua aggr.	aggr.	Avena barbata	Landolt et al. (2010)
Avena fatua aggr.	aggr.	Avena fatua	Landolt et al. (2010)
Avena fatua aggr.	aggr.	Avena sterilis	Landolt et al. (2010)
Avena sativa aggr.	aggr.	Avena nuda	Landolt et al. (2010)
Avena sativa aggr.	aggr.	Avena sativa	Landolt et al. (2010)
Avena sativa aggr.	aggr.	Avena strigosa	Landolt et al. (2010)
Barbarea verna aggr.	aggr.	Barbarea intermedia	Landolt et al. (2010)
Barbarea verna aggr.	aggr.	Barbarea stricta	Landolt et al. (2010)
Barbarea verna aggr.	aggr.	Barbarea verna	Landolt et al. (2010)
Barbarea verna aggr.	aggr.	Barbarea vulgaris	Landolt et al. (2010)
Bassia scoparia aggr.	aggr.	Bassia laniflora	Landolt et al. (2010)
Bassia scoparia aggr.	aggr.	Bassia scoparia	Landolt et al. (2010)
Bellis perennis aggr.	aggr.	Bellis perennis	Landolt et al. (2010)
Bellis perennis aggr.	aggr.	Bellis sylvestris	Landolt et al. (2010)
Beta vulgaris aggr.	aggr.	Beta macrocarpa	[ad hoc]
Beta vulgaris aggr.	aggr.	Beta vulgaris	[ad hoc]
Betula pendula aggr.	aggr.	Betula pendula	Juillerat et al. (2017)
Betula pendula aggr.	aggr.	Betula pubescens	Juillerat et al. (2017)
Bidens bipinnata aggr.	aggr.	Bidens bipinnata	Landolt et al. (2010)
Bidens bipinnata aggr.	aggr.	Bidens subalternans	Landolt et al. (2010)
Bidens tripartita aggr.	aggr.	Bidens comosa	Landolt et al. (2010)	Addition of B. comosa
Bidens tripartita aggr.	aggr.	Bidens radiata	Landolt et al. (2010)	Addition of B. comosa
Bidens tripartita aggr.	aggr.	Bidens tripartita	Landolt et al. (2010)	Addition of B. comosa
Biscutella laevigata aggr.	aggr.	Biscutella ambigua	Landolt et al. (2010)
Biscutella laevigata aggr.	aggr.	Biscutella brevicaulis	Landolt et al. (2010)
Biscutella laevigata aggr.	aggr.	Biscutella coronopifolia	Landolt et al. (2010)
Biscutella laevigata aggr.	aggr.	Biscutella laevigata	Landolt et al. (2010)
Biscutella laevigata aggr.	aggr.	Biscutella ossolana	Landolt et al. (2010)
Biscutella laevigata aggr.	aggr.	Biscutella prealpina	Landolt et al. (2010)
Bolboschoenus maritimus aggr.	aggr.	Bolboschoenus glaucus	Landolt et al. (2010)
Bolboschoenus maritimus aggr.	aggr.	Bolboschoenus laticarpus	Landolt et al. (2010)
Bolboschoenus maritimus aggr.	aggr.	Bolboschoenus maritimus	Landolt et al. (2010)
Bolboschoenus maritimus aggr.	aggr.	Bolboschoenus planiculmis	Landolt et al. (2010)
Bolboschoenus maritimus aggr.	aggr.	Bolboschoenus yagara	Landolt et al. (2010)
Bombycilaena erecta aggr.	aggr.	Bombycilaena discolor	Landolt et al. (2010)
Bombycilaena erecta aggr.	aggr.	Bombycilaena erecta	Landolt et al. (2010)
Brachypodium pinnatum aggr.	aggr.	Brachypodium phoenicoides	Landolt et al. (2010)
Brachypodium pinnatum aggr.	aggr.	Brachypodium pinnatum	Landolt et al. (2010)
Brachypodium pinnatum aggr.	aggr.	Brachypodium rupestre	Landolt et al. (2010)
Brassica oleracea aggr.	aggr.	Brassica montana	Landolt et al. (2010)
Brassica oleracea aggr.	aggr.	Brassica oleracea	Landolt et al. (2010)
Bromopsis erecta aggr.	aggr.	Bromopsis condensata	Landolt et al. (2010)
Bromopsis erecta aggr.	aggr.	Bromopsis erecta	Landolt et al. (2010)
Bromopsis erecta aggr.	aggr.	Bromopsis pannonica	Landolt et al. (2010)
Bromopsis inermis aggr.	aggr.	Bromopsis inermis	Juillerat et al. (2017)	Genus changed
Bromopsis inermis aggr.	aggr.	Bromopsis pumpelliana	Juillerat et al. (2017)	Genus changed
Bromopsis ramosa aggr.	aggr.	Bromopsis benekenii	Ehrendorfer (1973)	Genus changed
Bromopsis ramosa aggr.	aggr.	Bromopsis ramosa	Ehrendorfer (1973)	Genus changed
Bromus arvensis aggr. s.l.	aggr. s.l.	Bromus arvensis	Landolt et al. (2010)
Bromus arvensis aggr. s.l.	aggr. s.l.	Bromus japonicus	Landolt et al. (2010)
Bromus arvensis aggr. s.l.	aggr. s.l.	Bromus racemosus aggr.	Landolt et al. (2010)
Bromus arvensis aggr. s.l.	aggr. s.l.	Bromus secalinus aggr.	Landolt et al. (2010)
Bromus arvensis aggr. s.l.	aggr. s.l.	Bromus squarrosus	Landolt et al. (2010)
Bromus hordeaceus aggr.	aggr.	Bromus hordeaceus	Ehrendorfer (1973)
Bromus hordeaceus aggr.	aggr.	Bromus lepidus	Ehrendorfer (1973)
Bromus racemosus aggr.	aggr.	Bromus commutatus	Ehrendorfer (1973)
Bromus racemosus aggr.	aggr.	Bromus racemosus	Ehrendorfer (1973)
Bromus secalinus aggr.	aggr.	Bromus bromoideus	Ehrendorfer (1973)
Bromus secalinus aggr.	aggr.	Bromus grossus	Ehrendorfer (1973)
Bromus secalinus aggr.	aggr.	Bromus secalinus	Ehrendorfer (1973)
Bryonia cretica aggr.	aggr.	Bryonia cretica	[ad hoc]
Bryonia cretica aggr.	aggr.	Bryonia dioica	[ad hoc]
Bryonia cretica aggr.	aggr.	Bryonia marmorata	[ad hoc]
Buglossoides arvensis aggr.	aggr.	Buglossoides arvensis	Landolt et al. (2010)
Buglossoides arvensis aggr.	aggr.	Buglossoides incrassata	Landolt et al. (2010)
Bupleurum falcatum aggr.	aggr.	Bupleurum alpigenum	Landolt et al. (2010)
Bupleurum falcatum aggr.	aggr.	Bupleurum falcatum	Landolt et al. (2010)
Bupleurum rotundifolium aggr.	aggr.	Bupleurum rotundifolium	Landolt et al. (2010)
Bupleurum rotundifolium aggr.	aggr.	Bupleurum subovatum	Landolt et al. (2010)
Bupleurum tenuissimum aggr.	aggr.	Bupleurum affine	Landolt et al. (2010)
Bupleurum tenuissimum aggr.	aggr.	Bupleurum baldense	Landolt et al. (2010)
Bupleurum tenuissimum aggr.	aggr.	Bupleurum gerardi	Landolt et al. (2010)
Bupleurum tenuissimum aggr.	aggr.	Bupleurum praealtum	Landolt et al. (2010)
Bupleurum tenuissimum aggr.	aggr.	Bupleurum tenuissimum	Landolt et al. (2010)
Bupleurum tenuissimum aggr.	aggr.	Bupleurum veronense	Landolt et al. (2010)
Calamagrostis canescens aggr.	aggr.	Calamagrostis canescens	Ehrendorfer (1973)
Calamagrostis canescens aggr.	aggr.	Calamagrostis purpurea	Ehrendorfer (1973)
Callianthemum anemonoides aggr.	aggr.	Callianthemum anemonoides	Landolt et al. (2010)
Callianthemum anemonoides aggr.	aggr.	Callianthemum kernerianum	Landolt et al. (2010)
Callitriche brutia aggr.	aggr.	Callitriche brutia	Euro+Med (2022)
Callitriche brutia aggr.	aggr.	Callitriche hamulata	Euro+Med (2022)
Callitriche palustris aggr. s.l.	aggr. s.l.	Callitriche brutia aggr.	Landolt et al. (2010)
Callitriche palustris aggr. s.l.	aggr. s.l.	Callitriche cophocarpa	Landolt et al. (2010)
Callitriche palustris aggr. s.l.	aggr. s.l.	Callitriche obtusangula	Landolt et al. (2010)
Callitriche palustris aggr. s.l.	aggr. s.l.	Callitriche palustris	Landolt et al. (2010)
Callitriche palustris aggr. s.l.	aggr. s.l.	Callitriche platycarpa	Landolt et al. (2010)
Callitriche palustris aggr. s.l.	aggr. s.l.	Callitriche stagnalis	Landolt et al. (2010)
Calystegia sepium aggr.	aggr.	Calystegia pulchra	Ehrendorfer (1973)
Calystegia sepium aggr.	aggr.	Calystegia sepium	Ehrendorfer (1973)
Calystegia sepium aggr.	aggr.	Calystegia silvatica	Ehrendorfer (1973)
Camelina sativa aggr.	aggr.	Camelina alyssum	Landolt et al. (2010)
Camelina sativa aggr.	aggr.	Camelina microcarpa	Landolt et al. (2010)
Camelina sativa aggr.	aggr.	Camelina rumelica	Landolt et al. (2010)
Camelina sativa aggr.	aggr.	Camelina sativa	Landolt et al. (2010)
Campanula cespitosa aggr.	aggr.	Campanula cespitosa	Landolt et al. (2010)
Campanula cespitosa aggr.	aggr.	Campanula cochleariifolia	Landolt et al. (2010)
Campanula garganica aggr.	aggr.	Campanula garganica	Landolt et al. (2010)
Campanula garganica aggr.	aggr.	Campanula portenschlagiana	Landolt et al. (2010)
Campanula rotundifolia aggr.	aggr.	Campanula baumgartenii	Landolt et al. (2010)
Campanula rotundifolia aggr.	aggr.	Campanula carnica	Landolt et al. (2010)
Campanula rotundifolia aggr.	aggr.	Campanula rotundifolia	Landolt et al. (2010)
Campanula rotundifolia aggr.	aggr.	Campanula sabatia	Landolt et al. (2010)
Campanula rotundifolia aggr.	aggr.	Campanula scheuchzeri	Landolt et al. (2010)
Capparis spinosa aggr. s.l.	aggr. s.l.	Capparis orientalis	Landolt et al. (2010)
Capparis spinosa aggr. s.l.	aggr. s.l.	Capparis spinosa aggr.	Landolt et al. (2010)
Capparis spinosa aggr.	aggr.	Capparis aegyptia	Euro+Med (2022)
Capparis spinosa aggr.	aggr.	Capparis atlantica	Euro+Med (2022)
Capparis spinosa aggr.	aggr.	Capparis ovata	Euro+Med (2022)
Capparis spinosa aggr.	aggr.	Capparis parviflora	Euro+Med (2022)
Capparis spinosa aggr.	aggr.	Capparis sicula	Euro+Med (2022)
Capparis spinosa aggr.	aggr.	Capparis spinosa	Euro+Med (2022)
Capparis spinosa aggr.	aggr.	Capparis zoharyi	Euro+Med (2022)
Capsella bursa-pastoris aggr.	aggr.	Capsella bursa-pastoris	Landolt et al. (2010)
Capsella bursa-pastoris aggr.	aggr.	Capsella grandiflora	Landolt et al. (2010)
Capsella bursa-pastoris aggr.	aggr.	Capsella rubella	Landolt et al. (2010)
Cardamine flexuosa aggr.	aggr.	Cardamine flexuosa	Juillerat et al. (2017)
Cardamine flexuosa aggr.	aggr.	Cardamine occulta	Juillerat et al. (2017)
Cardamine hirsuta aggr. s.l.	aggr.	Cardamine flexuosa aggr.	Landolt et al. (2010)
Cardamine hirsuta aggr. s.l.	aggr.	Cardamine hirsuta	Landolt et al. (2010)
Cardamine pratensis aggr.	aggr.	Cardamine dentata	Landolt et al. (2010)
Cardamine pratensis aggr.	aggr.	Cardamine granulosa	Landolt et al. (2010)
Cardamine pratensis aggr.	aggr.	Cardamine matthioli	Landolt et al. (2010)
Cardamine pratensis aggr.	aggr.	Cardamine pratensis	Landolt et al. (2010)
Cardamine pratensis aggr.	aggr.	Cardamine pseudorivularis	Landolt et al. (2010)
Cardamine pratensis aggr.	aggr.	Cardamine schulzii	Landolt et al. (2010)
Cardamine pratensis aggr.	aggr.	Cardamine x insueta	Landolt et al. (2010)
Carduus acanthoides aggr.	aggr.	Carduus acanthoides	Landolt et al. (2010)
Carduus acanthoides aggr.	aggr.	Carduus aurosicus	Landolt et al. (2010)
Carduus bourgeanus aggr.	aggr.	Carduus bourgeanus	Euro+Med (2022)
Carduus bourgeanus aggr.	aggr.	Carduus ibicensis	Euro+Med (2022)
Carduus candicans aggr.	aggr.	Carduus carduelis	Landolt et al. (2010)
Carduus candicans aggr.	aggr.	Carduus collinus	Landolt et al. (2010)
Carduus crispus aggr.	aggr.	Carduus crispus	Landolt et al. (2010)
Carduus crispus aggr.	aggr.	Carduus litigiosus	Landolt et al. (2010)
Carduus pycnocephalus aggr.	aggr.	Carduus pycnocephalus	Landolt et al. (2010)
Carduus pycnocephalus aggr.	aggr.	Carduus tenuiflorus	Landolt et al. (2010)
Carex acuta aggr.	aggr.	Carex acuta	Juillerat et al. (2017)
Carex acuta aggr.	aggr.	Carex randalpina	Juillerat et al. (2017)
Carex atrata aggr.	aggr.	Carex atrata	Juillerat et al. (2017)
Carex atrata aggr.	aggr.	Carex parviflora	Juillerat et al. (2017)
Carex buxbaumii aggr.	aggr.	Carex buxbaumii	Ehrendorfer (1973)
Carex buxbaumii aggr.	aggr.	Carex hartmaniorum	Ehrendorfer (1973)
Carex canescens aggr.	aggr.	Carex brunnescens	Ehrendorfer (1973)
Carex canescens aggr.	aggr.	Carex canescens	Ehrendorfer (1973)
Carex digitata aggr.	aggr	Carex digitata	[ad hoc]
Carex digitata aggr.	aggr	Carex pallidula	[ad hoc]
Carex disticha aggr.	aggr.	Carex disticha	Landolt et al. (2010)
Carex disticha aggr.	aggr.	Carex repens	Landolt et al. (2010)
Carex elata aggr.	aggr.	Carex cespitosa	Landolt et al. (2010)	Excl. C. juncella (syn. of C. nigra)
Carex elata aggr.	aggr.	Carex elata	Landolt et al. (2010)	Excl. C. juncella (syn. of C. nigra)
Carex ferruginea aggr.	aggr.	Carex australpina	Ehrendorfer (1973)
Carex ferruginea aggr.	aggr.	Carex ferruginea	Ehrendorfer (1973)
Carex flava aggr.	aggr.	Carex demissa	Landolt et al. (2010)
Carex flava aggr.	aggr.	Carex flava	Landolt et al. (2010)
Carex flava aggr.	aggr.	Carex lepidocarpa	Landolt et al. (2010)
Carex flava aggr.	aggr.	Carex mairei	Landolt et al. (2010)
Carex flava aggr.	aggr.	Carex viridula	Landolt et al. (2010)
Carex montana aggr.	aggr.	Carex fritschii	Landolt et al. (2010)
Carex montana aggr.	aggr.	Carex montana	Landolt et al. (2010)
Carex muricata aggr.	aggr.	Carex divulsa	Landolt et al. (2010)
Carex muricata aggr.	aggr.	Carex muricata	Landolt et al. (2010)
Carex muricata aggr.	aggr.	Carex spicata	Landolt et al. (2010)
Carex praecox aggr.	aggr.	Carex brizoides	Chytrý et al. (2018)
Carex praecox aggr.	aggr.	Carex praecox	Chytrý et al. (2018)
Carex vesicaria aggr.	aggr.	Carex rostrata	Landolt et al. (2010)
Carex vesicaria aggr.	aggr.	Carex vesicaria	Landolt et al. (2010)
Carex vulpina aggr.	aggr.	Carex cuprina	Ehrendorfer (1973)
Carex vulpina aggr.	aggr.	Carex vulpina	Ehrendorfer (1973)
Carlina vulgaris aggr.	aggr.	Carlina biebersteinii	Juillerat et al. (2017)
Carlina vulgaris aggr.	aggr.	Carlina vulgaris	Juillerat et al. (2017)
Carthamus lanatus aggr.	aggr.	Carthamus creticus	Euro+Med (2022)
Carthamus lanatus aggr.	aggr.	Carthamus lanatus	Euro+Med (2022)
Carthamus lanatus aggr.	aggr.	Carthamus turkestanicus	Euro+Med (2022)
Centaurea arenaria aggr.	aggr.	Centaurea arenaria	Euro+Med (2022)
Centaurea arenaria aggr.	aggr.	Centaurea borysthenica	Euro+Med (2022)
Centaurea arenaria aggr.	aggr.	Centaurea jankana	Euro+Med (2022)
Centaurea arenaria aggr.	aggr.	Centaurea majorovii	Euro+Med (2022)
Centaurea arenaria aggr.	aggr.	Centaurea odessana	Euro+Med (2022)
Centaurea arenaria aggr.	aggr.	Centaurea sophiae	Euro+Med (2022)
Centaurea arenaria aggr.	aggr.	Centaurea tauscheri	Euro+Med (2022)
Centaurea arenaria aggr.	aggr.	Centaurea wolgensis	Euro+Med (2022)
Centaurea cuspidata aggr.	aggr.	Centaurea biokovensis	Euro+Med (2022)
Centaurea cuspidata aggr.	aggr.	Centaurea cuspidata	Euro+Med (2022)
Centaurea cuspidata aggr.	aggr.	Centaurea derventana	Euro+Med (2022)
Centaurea cuspidata aggr.	aggr.	Centaurea edith-mariae	Euro+Med (2022)
Centaurea cuspidata aggr.	aggr.	Centaurea gloriosa	Euro+Med (2022)
Centaurea cuspidata aggr.	aggr.	Centaurea incompta	Euro+Med (2022)
Centaurea cuspidata aggr.	aggr.	Centaurea kusanii	Euro+Med (2022)
Centaurea cuspidata aggr.	aggr.	Centaurea mayeri	Euro+Med (2022)
Centaurea cuspidata aggr.	aggr.	Centaurea mucurensis	Euro+Med (2022)
Centaurea cuspidata aggr.	aggr.	Centaurea radichii	Euro+Med (2022)
Centaurea cuspidata aggr.	aggr.	Centaurea visianii	Euro+Med (2022)
Centaurea jacea aggr.	aggr.	Centaurea decipiens	Landolt et al. (2010)
Centaurea jacea aggr.	aggr.	Centaurea jacea	Landolt et al. (2010)
Centaurea jacea aggr.	aggr.	Centaurea macroptilon	Landolt et al. (2010)
Centaurea jacea aggr.	aggr.	Centaurea nemoralis	Landolt et al. (2010)
Centaurea jacea aggr.	aggr.	Centaurea nigra	Landolt et al. (2010)
Centaurea jacea aggr.	aggr.	Centaurea nigrescens	Landolt et al. (2010)
Centaurea jacea aggr.	aggr.	Centaurea subjacea	Landolt et al. (2010)
Centaurea jacea aggr.	aggr.	Centaurea thuillieri	Landolt et al. (2010)
Centaurea margaritacea aggr.	aggr.	Centaurea appendicata	Euro+Med (2022)
Centaurea margaritacea aggr.	aggr.	Centaurea breviceps	Euro+Med (2022)
Centaurea margaritacea aggr.	aggr.	Centaurea donetzica	Euro+Med (2022)
Centaurea margaritacea aggr.	aggr.	Centaurea dubjanskyi	Euro+Med (2022)
Centaurea margaritacea aggr.	aggr.	Centaurea gerberi	Euro+Med (2022)
Centaurea margaritacea aggr.	aggr.	Centaurea konkae	Euro+Med (2022)
Centaurea margaritacea aggr.	aggr.	Centaurea margaritacea	Euro+Med (2022)
Centaurea margaritacea aggr.	aggr.	Centaurea margaritalba	Euro+Med (2022)
Centaurea margaritacea aggr.	aggr.	Centaurea paczoskii	Euro+Med (2022)
Centaurea margaritacea aggr.	aggr.	Centaurea pineticola	Euro+Med (2022)
Centaurea margaritacea aggr.	aggr.	Centaurea protogerberi	Euro+Med (2022)
Centaurea margaritacea aggr.	aggr.	Centaurea protomargaritacea	Euro+Med (2022)
Centaurea margaritacea aggr.	aggr.	Centaurea pseudoleucolepis	Euro+Med (2022)
Centaurea ovina aggr.	aggr.	Centaurea aziziana	Euro+Med (2022)
Centaurea ovina aggr.	aggr.	Centaurea besseriana	Euro+Med (2022)
Centaurea ovina aggr.	aggr.	Centaurea caprina	Euro+Med (2022)
Centaurea ovina aggr.	aggr.	Centaurea demetrii	Euro+Med (2022)
Centaurea ovina aggr.	aggr.	Centaurea gulissashvilii	Euro+Med (2022)
Centaurea ovina aggr.	aggr.	Centaurea hohenackeri	Euro+Med (2022)
Centaurea ovina aggr.	aggr.	Centaurea lavrenkoana	Euro+Med (2022)
Centaurea ovina aggr.	aggr.	Centaurea ovina	Euro+Med (2022)
Centaurea ovina aggr.	aggr.	Centaurea steveniana	Euro+Med (2022)
Centaurea paniculata aggr.	aggr.	Centaurea paniculata	Juillerat et al. (2017)
Centaurea paniculata aggr.	aggr.	Centaurea stoebe	Juillerat et al. (2017)
Centaurea paniculata aggr.	aggr.	Centaurea valesiaca	Juillerat et al. (2017)
Centaurea rupestris aggr.	aggr.	Centaurea dichroantha	Landolt et al. (2010)
Centaurea rupestris aggr.	aggr.	Centaurea rupestris	Landolt et al. (2010)
Centaurea spinosociliata aggr.	aggr.	Centaurea cristata	Euro+Med (2022)
Centaurea spinosociliata aggr.	aggr.	Centaurea spinosociliata	Euro+Med (2022)
Centaurea spinosociliata aggr.	aggr.	Centaurea tommasinii	Euro+Med (2022)
Centaurea sterilis aggr.	aggr.	Centaurea sarandinakiae	Euro+Med (2022)
Centaurea sterilis aggr.	aggr.	Centaurea semijusta	Euro+Med (2022)
Centaurea sterilis aggr.	aggr.	Centaurea sterilis	Euro+Med (2022)
Centaurea sterilis aggr.	aggr.	Centaurea vankovii	Euro+Med (2022)
Centaurea uniflora aggr.	aggr.	Centaurea alibeyana	Euro+Med (2022)
Centaurea uniflora aggr.	aggr.	Centaurea bugellensis	Euro+Med (2022)
Centaurea uniflora aggr.	aggr.	Centaurea flosculosa	Euro+Med (2022)
Centaurea uniflora aggr.	aggr.	Centaurea nervosa	Euro+Med (2022)
Centaurea uniflora aggr.	aggr.	Centaurea rhaetica	Euro+Med (2022)
Centaurea uniflora aggr.	aggr.	Centaurea uniflora	Euro+Med (2022)
Centaurium erythraea aggr.	aggr.	Centaurium erythraea	Landolt et al. (2010)
Centaurium erythraea aggr.	aggr.	Centaurium favargeri	Landolt et al. (2010)
Centaurium erythraea aggr.	aggr.	Centaurium littorale	Landolt et al. (2010)
Centranthus ruber aggr.	aggr.	Centranthus angustifolius	Landolt et al. (2010)
Centranthus ruber aggr.	aggr.	Centranthus lecoqii	Landolt et al. (2010)
Centranthus ruber aggr.	aggr.	Centranthus ruber	Landolt et al. (2010)
Cerastium alpinum aggr.	aggr.	Cerastium alpinum	Landolt et al. (2010)
Cerastium alpinum aggr.	aggr.	Cerastium eriophorum	Landolt et al. (2010)
Cerastium alpinum aggr.	aggr.	Cerastium lineare	Landolt et al. (2010)
Cerastium arvense aggr.	aggr.	Cerastium arvense	Landolt et al. (2010)
Cerastium arvense aggr.	aggr.	Cerastium julicum	Landolt et al. (2010)
Cerastium latifolium aggr.	aggr.	Cerastium carinthiacum	Landolt et al. (2010)
Cerastium latifolium aggr.	aggr.	Cerastium latifolium	Landolt et al. (2010)
Cerastium latifolium aggr.	aggr.	Cerastium pedunculatum	Landolt et al. (2010)
Cerastium latifolium aggr.	aggr.	Cerastium uniflorum	Landolt et al. (2010)
Cerastium semidecandrum aggr.	aggr.	Cerastium brachypetalum	Landolt et al. (2010)
Cerastium semidecandrum aggr.	aggr.	Cerastium glomeratum	Landolt et al. (2010)
Cerastium semidecandrum aggr.	aggr.	Cerastium ligusticum	Landolt et al. (2010)
Cerastium semidecandrum aggr.	aggr.	Cerastium pumilum	Landolt et al. (2010)
Cerastium semidecandrum aggr.	aggr.	Cerastium semidecandrum	Landolt et al. (2010)
Ceratochloa cathartica aggr.	aggr.	Ceratochloa carinata	Landolt et al. (2010)
Ceratochloa cathartica aggr.	aggr.	Ceratochloa cathartica	Landolt et al. (2010)
Ceratophyllum demersum aggr.	aggr.	Ceratophyllum demersum	[ad hoc]
Ceratophyllum demersum aggr.	aggr.	Ceratophyllum platyacanthum	[ad hoc]
Cerinthe major aggr.	aggr.	Cerinthe gymnandra	[ad hoc]
Cerinthe major aggr.	aggr.	Cerinthe major	[ad hoc]
Chaerophyllum hirsutum aggr.	aggr.	Chaerophyllum elegans	Juillerat et al. (2017)
Chaerophyllum hirsutum aggr.	aggr.	Chaerophyllum hirsutum	Juillerat et al. (2017)
Chaerophyllum hirsutum aggr.	aggr.	Chaerophyllum villarsii	Juillerat et al. (2017)
Chenopodium album aggr.	aggr.	Chenopodium album	Juillerat et al. (2017)
Chenopodium album aggr.	aggr.	Chenopodium berlandieri	Juillerat et al. (2017)
Chenopodium album aggr.	aggr.	Chenopodium betaceum	Juillerat et al. (2017)
Chenopodium album aggr.	aggr.	Chenopodium giganteum	Juillerat et al. (2017)
Chenopodium album aggr.	aggr.	Chenopodium opulifolium	Juillerat et al. (2017)
Chenopodium album aggr.	aggr.	Chenopodium pratericola	Juillerat et al. (2017)
Chenopodium album aggr.	aggr.	Chenopodium suecicum	Juillerat et al. (2017)
Cherleria laricifolia aggr.	aggr.	Cherleria langii	Landolt et al. (2010)	Genus changed: Minuartia > Cherleria
Cherleria laricifolia aggr.	aggr.	Cherleria laricifolia	Landolt et al. (2010)	Genus changed: Minuartia > Cherleria
Cinnamomum glanduliferum aggr.	aggr.	Cinnamomum camphora	[ad hoc]
Cinnamomum glanduliferum aggr.	aggr.	Cinnamomum glanduliferum	[ad hoc]
Cirsium eriophorum aggr.	aggr.	Cirsium eriophorum	Landolt et al. (2010)
Cirsium eriophorum aggr.	aggr.	Cirsium ferox	Landolt et al. (2010)
Cirsium eriophorum aggr.	aggr.	Cirsium morisianum	Landolt et al. (2010)
Clinopodium nepeta aggr.	aggr.	Clinopodium menthifolium	Ehrendorfer (1973)	Genus changed
Clinopodium nepeta aggr.	aggr.	Clinopodium nepeta	Ehrendorfer (1973)	Genus changed
Cochlearia officinalis aggr.	aggr.	Cochlearia bavarica	Ehrendorfer (1973)	Combined with Landolt et al. (2010)
Cochlearia officinalis aggr.	aggr.	Cochlearia excelsa	Ehrendorfer (1973)	Combined with Landolt et al. (2010)
Cochlearia officinalis aggr.	aggr.	Cochlearia macrorrhiza	Ehrendorfer (1973)	Combined with Landolt et al. (2010)
Cochlearia officinalis aggr.	aggr.	Cochlearia officinalis	Ehrendorfer (1973)	Combined with Landolt et al. (2010)
Cochlearia officinalis aggr.	aggr.	Cochlearia pyrenaica	Ehrendorfer (1973)	Combined with Landolt et al. (2010)
Colchicum autumnale aggr.	aggr.	Colchicum autumnale	Landolt et al. (2010)
Colchicum autumnale aggr.	aggr.	Colchicum lusitanum	Landolt et al. (2010)
Colchicum autumnale aggr.	aggr.	Colchicum neapolitanum	Landolt et al. (2010)
Collomia grandiflora aggr.	aggr.	Collomia grandiflora	Landolt et al. (2010)
Collomia grandiflora aggr.	aggr.	Collomia linearis	Landolt et al. (2010)
Consolida ajacis aggr.	aggr.	Consolida ajacis	Landolt et al. (2010)
Consolida ajacis aggr.	aggr.	Consolida hispanica	Landolt et al. (2010)
Consolida ajacis aggr.	aggr.	Consolida pubescens	Landolt et al. (2010)
Corispermum canescens aggr.	aggr.	Corispermum canescens	Euro+Med (2022)
Corispermum canescens aggr.	aggr.	Corispermum marschallii	Euro+Med (2022)
Cornus alba aggr.	aggr.	Cornus alba	Landolt et al. (2010)
Cornus alba aggr.	aggr.	Cornus sericea	Landolt et al. (2010)
Cota altissima aggr.	aggr.	Cota altissima	Landolt et al. (2010)
Cota altissima aggr.	aggr.	Cota austriaca	Landolt et al. (2010)
Cota altissima aggr.	aggr.	Cota segetalis	Landolt et al. (2010)
Cota tinctoria aggr.	aggr.	Cota tinctoria	Landolt et al. (2010)	Genus changed
Cota tinctoria aggr.	aggr.	Cota triumfettii	Landolt et al. (2010)	Genus changed
Cotoneaster dammeri aggr.	aggr.	Cotoneaster dammeri	[ad hoc]
Cotoneaster dammeri aggr.	aggr.	Cotoneaster franchetii	[ad hoc]
Cotoneaster dammeri aggr.	aggr.	Cotoneaster integrifolius	[ad hoc]
Cotoneaster dammeri aggr. s.l.	aggr. s.l.	Cotoneaster dammeri aggr.	Landolt et al. (2010)
Cotoneaster dammeri aggr. s.l.	aggr. s.l.	Cotoneaster microphyllus	Landolt et al. (2010)
Cotoneaster divaricatus aggr.	aggr.	Cotoneaster acuminatus	[ad hoc]
Cotoneaster divaricatus aggr.	aggr.	Cotoneaster bullatus	[ad hoc]
Cotoneaster divaricatus aggr.	aggr.	Cotoneaster dielsianus	[ad hoc]
Cotoneaster divaricatus aggr.	aggr.	Cotoneaster divaricatus	[ad hoc]
Cotoneaster horizontalis aggr.	aggr.	Cotoneaster adpressus	[ad hoc]
Cotoneaster horizontalis aggr.	aggr.	Cotoneaster horizontalis	[ad hoc]
Cotoneaster horizontalis aggr. s.l.	aggr. s.l.	Cotoneaster divaricatus agg.	Landolt et al. (2010)
Cotoneaster horizontalis aggr. s.l.	aggr. s.l.	Cotoneaster horizontalis aggr.	Landolt et al. (2010)
Cotoneaster horizontalis aggr. s.l.	aggr. s.l.	Cotoneaster simonsii	Landolt et al. (2010)
Cotoneaster integerrimus aggr.	aggr.	Cotoneaster delphinensis	Landolt et al. (2010)
Cotoneaster integerrimus aggr.	aggr.	Cotoneaster integerrimus	Landolt et al. (2010)
Cotoneaster integerrimus aggr.	aggr.	Cotoneaster intermedius	Landolt et al. (2010)
Cotoneaster integerrimus aggr.	aggr.	Cotoneaster juranus	Landolt et al. (2010)
Cotoneaster integerrimus aggr.	aggr.	Cotoneaster raboutensis	Landolt et al. (2010)
Cotoneaster integerrimus aggr.	aggr.	Cotoneaster tomentosus	Landolt et al. (2010)
Crataegus monogyna aggr.	aggr.	Crataegus monogyna	Juillerat et al. (2017)
Crataegus monogyna aggr.	aggr.	Crataegus rhipidophylla	Juillerat et al. (2017)
Crataegus monogyna aggr. s.l.	aggr. s.l.	Crataegus laevigata	Landolt et al. (2010)
Crataegus monogyna aggr. s.l.	aggr. s.l.	Crataegus monogyna aggr.	Landolt et al. (2010)
Crepis praemorsa aggr.	aggr.	Crepis froelichiana	Landolt et al. (2010)
Crepis praemorsa aggr.	aggr.	Crepis praemorsa	Landolt et al. (2010)
Crocus boryi aggr.	aggr.	Crocus boryi	[ad hoc]
Crocus boryi aggr.	aggr.	Crocus tournefortii	[ad hoc]
Crucianella angustifolia aggr.	aggr.	Crucianella angustifolia	Landolt et al. (2010)
Crucianella angustifolia aggr.	aggr.	Crucianella latifolia	Landolt et al. (2010)
Cuscuta australis aggr.	aggr.	Cuscuta australis	Landolt et al. (2010)
Cuscuta australis aggr.	aggr.	Cuscuta campestris	Landolt et al. (2010)
Cuscuta australis aggr.	aggr.	Cuscuta gronovii	Landolt et al. (2010)
Cuscuta australis aggr.	aggr.	Cuscuta suaveolens	Landolt et al. (2010)
Cuscuta epithymum aggr.	aggr.	Cuscuta approximata	Landolt et al. (2010)
Cuscuta epithymum aggr.	aggr.	Cuscuta epithymum	Landolt et al. (2010)
Cuscuta epithymum aggr.	aggr.	Cuscuta planiflora	Landolt et al. (2010)
Cuscuta europaea aggr.	aggr.	Cuscuta epilinum	Landolt et al. (2010)
Cuscuta europaea aggr.	aggr.	Cuscuta europaea	Landolt et al. (2010)
Cuscuta lupuliformis aggr.	aggr.	Cuscuta lupuliformis	Landolt et al. (2010)
Cuscuta lupuliformis aggr.	aggr.	Cuscuta monogyna	Landolt et al. (2010)
Cyanus montanus aggr.	aggr.	Cyanus adscendens	Landolt et al. (2010)	Genus changed, addition of C. adscencens and C. mollis
Cyanus montanus aggr.	aggr.	Cyanus mollis	Landolt et al. (2010)	Genus changed, addition of C. adscencens and C. mollis
Cyanus montanus aggr.	aggr.	Cyanus montanus	Landolt et al. (2010)	Genus changed, addition of C. adscencens and C. mollis
Cyanus montanus aggr.	aggr.	Cyanus triumfettii	Landolt et al. (2010)	Genus changed, addition of C. adscencens and C. mollis
Cymbalaria microcalyx aggr.	aggr.	Cymbalaria acutiloba	[ad hoc]
Cymbalaria microcalyx aggr.	aggr.	Cymbalaria microcalyx	[ad hoc]
Cynara cardunculus aggr.	aggr.	Cynara cardunculus	Landolt et al. (2010)
Cynara cardunculus aggr.	aggr.	Cynara scolymus	Landolt et al. (2010)
Cynoglossum officinale aggr.	aggr.	Cynoglossum dioscoridis	Landolt et al. (2010)
Cynoglossum officinale aggr.	aggr.	Cynoglossum officinale	Landolt et al. (2010)
Cyperus laevigatus aggr.	aggr.	Cyperus distachyos	[ad hoc]
Cyperus laevigatus aggr.	aggr.	Cyperus laevigatus	[ad hoc]
Cystopteris montana aggr.	aggr.	Cystopteris montana	Landolt et al. (2010)
Cystopteris montana aggr.	aggr.	Cystopteris sudetica	Landolt et al. (2010)
Cytisus ardoinii aggr.	aggr.	Cytisus ardoinii	Landolt et al. (2010)
Cytisus ardoinii aggr.	aggr.	Cytisus ardoinii	Landolt et al. (2010)	Typo corrected: adoinoi > ardoinii
Cytisus ardoinii aggr.	aggr.	Cytisus sauzeanus	Landolt et al. (2010)
Cytisus ardoinii aggr.	aggr.	Cytisus sauzeanus	Landolt et al. (2010)	Typo corrected: adoinoi > ardoinii
Cytisus decumbens aggr.	aggr.	Cytisus decumbens	Landolt et al. (2010)
Cytisus decumbens aggr.	aggr.	Cytisus pseudoprocumbens	Landolt et al. (2010)
Cytisus hirsutus aggr.	aggr.	Cytisus hirsutus	Landolt et al. (2010)	Genus changed
Cytisus hirsutus aggr.	aggr.	Cytisus purpureus	Landolt et al. (2010)	Genus changed
Cytisus hirsutus aggr.	aggr.	Cytisus ratisbonensis	Landolt et al. (2010)	Genus changed
Cytisus hirsutus aggr.	aggr.	Cytisus triflorus	Landolt et al. (2010)	Genus changed
Dactylorhiza maculata aggr.	aggr.	Dactylorhiza fuchsii	Ehrendorfer (1973)
Dactylorhiza maculata aggr.	aggr.	Dactylorhiza maculata	Ehrendorfer (1973)
Dactylorhiza maculata aggr. s.l.	aggr. s.l.	Dactylorhiza incarnata	Landolt et al. (2010)
Dactylorhiza maculata aggr. s.l.	aggr. s.l.	Dactylorhiza maculata aggr.	Landolt et al. (2010)
Dactylorhiza maculata aggr. s.l.	aggr. s.l.	Dactylorhiza majalis aggr.	Landolt et al. (2010)
Dactylorhiza majalis aggr.	aggr.	Dactylorhiza alpestris	Ehrendorfer (1973)
Dactylorhiza majalis aggr.	aggr.	Dactylorhiza lapponica	Ehrendorfer (1973)
Dactylorhiza majalis aggr.	aggr.	Dactylorhiza majalis	Ehrendorfer (1973)
Dactylorhiza majalis aggr.	aggr.	Dactylorhiza traunsteineri	Ehrendorfer (1973)
Damasonium alisma aggr.	aggr.	Damasonium alisma	Euro+Med (2022)
Damasonium alisma aggr.	aggr.	Damasonium bourgaei	Euro+Med (2022)
Damasonium alisma aggr.	aggr.	Damasonium polyspermum	Euro+Med (2022)
Delphinium cheilanthum aggr.	aggr.	Delphinium middendorffii	Euro+Med (2022)
Delphinium cuneatum aggr.	aggr.	Delphinium cuneatum	Euro+Med (2022)
Delphinium cuneatum aggr.	aggr.	Delphinium duhmbergii	Euro+Med (2022)
Delphinium cuneatum aggr.	aggr.	Delphinium litwinowii	Euro+Med (2022)
Delphinium cuneatum aggr.	aggr.	Delphinium subcuneatum	Euro+Med (2022)
Delphinium dyctiocarpum aggr.	aggr.	Delphinium cyananthum	Euro+Med (2022)
Delphinium dyctiocarpum aggr.	aggr.	Delphinium dyctiocarpum	Euro+Med (2022)
Delphinium dyctiocarpum aggr.	aggr.	Delphinium pubiflorum	Euro+Med (2022)
Delphinium elatum aggr.	aggr.	Delphinium apolanum	Euro+Med (2022)
Delphinium elatum aggr.	aggr.	Delphinium dubium	Euro+Med (2022)
Delphinium elatum aggr.	aggr.	Delphinium elatum	Euro+Med (2022)
Delphinium elatum aggr.	aggr.	Delphinium montanum	Euro+Med (2022)
Delphinium elatum aggr.	aggr.	Delphinium nurguschense	Euro+Med (2022)
Delphinium fissum aggr.	aggr.	Delphinium fissum	Euro+Med (2022)
Delphinium fissum aggr.	aggr.	Delphinium leiocarpum	Euro+Med (2022)
Delphinium peregrinum aggr.	aggr.	Delphinium ambiguum	Euro+Med (2022)
Delphinium peregrinum aggr.	aggr.	Delphinium balcanicum	Euro+Med (2022)
Delphinium peregrinum aggr.	aggr.	Delphinium bovei	Euro+Med (2022)
Delphinium peregrinum aggr.	aggr.	Delphinium davisii	Euro+Med (2022)
Delphinium peregrinum aggr.	aggr.	Delphinium gracile	Euro+Med (2022)
Delphinium peregrinum aggr.	aggr.	Delphinium halteratum	Euro+Med (2022)
Delphinium peregrinum aggr.	aggr.	Delphinium hellenicum	Euro+Med (2022)
Delphinium peregrinum aggr.	aggr.	Delphinium macropetalum	Euro+Med (2022)
Delphinium peregrinum aggr.	aggr.	Delphinium peregrinum	Euro+Med (2022)
Delphinium peregrinum aggr.	aggr.	Delphinium venulosum	Euro+Med (2022)
Delphinium peregrinum aggr.	aggr.	Delphinium verdunense	Euro+Med (2022)
Delphinium peregrinum aggr.	aggr.	Delphinium virgatum	Euro+Med (2022)
Dianthus carthusianorum aggr.	aggr.	Dianthus carthusianorum	Ehrendorfer (1973)	Combined with Landolt et al. (2010)
Dianthus carthusianorum aggr.	aggr.	Dianthus diutinus	Ehrendorfer (1973)	Combined with Landolt et al. (2010)
Dianthus carthusianorum aggr.	aggr.	Dianthus ferrugineus	Ehrendorfer (1973)	Combined with Landolt et al. (2010)
Dianthus carthusianorum aggr.	aggr.	Dianthus giganteiformis	Ehrendorfer (1973)	Combined with Landolt et al. (2010)
Dianthus carthusianorum aggr.	aggr.	Dianthus giganteus	Ehrendorfer (1973)	Combined with Landolt et al. (2010)
Dianthus carthusianorum aggr.	aggr.	Dianthus pontederae	Ehrendorfer (1973)	Combined with Landolt et al. (2010)
Dianthus hyssopifolius aggr.	aggr.	Dianthus hyssopifolius	Landolt et al. (2010)
Dianthus hyssopifolius aggr.	aggr.	Dianthus sternbergii	Landolt et al. (2010)
Dichoropetalum carvifolia aggr.	aggr.	Dichoropetalum carvifolia	Landolt et al. (2010)
Dichoropetalum carvifolia aggr.	aggr.	Dichoropetalum schottii	Landolt et al. (2010)
Digitaria ischaemum aggr.	aggr.	Digitaria ischaemum	Juillerat et al. (2017)
Digitaria ischaemum aggr.	aggr.	Digitaria violascens	Juillerat et al. (2017)
Digitaria sanguinalis aggr.	aggr.	Digitaria ciliaris	Juillerat et al. (2017)
Digitaria sanguinalis aggr.	aggr.	Digitaria sanguinalis	Juillerat et al. (2017)
Digitaria sanguinalis aggr. s.l.	aggr. s.l.	Digitaria ischaemum aggr.	Landolt et al. (2010)
Digitaria sanguinalis aggr. s.l.	aggr. s.l.	Digitaria sanguinalis aggr.	Landolt et al. (2010)
Dipsacus pilosus aggr.	aggr.	Dipsacus pilosus	Landolt et al. (2010)
Dipsacus pilosus aggr.	aggr.	Dipsacus strigosus	Landolt et al. (2010)
Doronicum clusii aggr.	aggr.	Doronicum clusii	Ehrendorfer (1973)
Doronicum clusii aggr.	aggr.	Doronicum glaciale	Ehrendorfer (1973)
Doronicum plantagineum aggr.	aggr.	Doronicum orientale	Juillerat et al. (2017)
Doronicum plantagineum aggr.	aggr.	Doronicum plantagineum	Juillerat et al. (2017)
Doronicum plantagineum aggr.	aggr.	Doronicum x excelsum	Juillerat et al. (2017)
Draba aizoides aggr.	aggr.	Draba aizoides	Landolt et al. (2010)
Draba aizoides aggr.	aggr.	Draba aspera	Landolt et al. (2010)
Draba aizoides aggr.	aggr.	Draba dolomitica	Landolt et al. (2010)
Draba aizoides aggr.	aggr.	Draba hoppeana	Landolt et al. (2010)
Draba aizoides aggr.	aggr.	Draba lasiocarpa	Landolt et al. (2010)
Draba fladnizensis aggr.	aggr.	Draba fladnizensis	Landolt et al. (2010)
Draba fladnizensis aggr.	aggr.	Draba siliquosa	Landolt et al. (2010)
Draba stellata aggr.	aggr.	Draba dubia	Landolt et al. (2010)
Draba stellata aggr.	aggr.	Draba stellata	Landolt et al. (2010)
Draba stellata aggr.	aggr.	Draba tomentosa	Landolt et al. (2010)
Draba verna aggr.	aggr.	Draba praecox	Ehrendorfer (1973)	Genus: Erophila > Draba
Draba verna aggr.	aggr.	Draba verna	Ehrendorfer (1973)	Genus: Erophila > Draba
Dryopteris carthusiana aggr.	aggr.	Dryopteris carthusiana	Wisskirchen & Haeupler (1998)
Dryopteris carthusiana aggr.	aggr.	Dryopteris dilatata	Wisskirchen & Haeupler (1998)
Dryopteris carthusiana aggr.	aggr.	Dryopteris expansa	Wisskirchen & Haeupler (1998)
Dryopteris carthusiana aggr.	aggr.	Dryopteris x deweveri	Wisskirchen & Haeupler (1998)
Dryopteris carthusiana aggr.	aggr.	Dryopteris x sarvelae	Wisskirchen & Haeupler (1998)
Dryopteris filix-mas aggr.	aggr.	Dryopteris affinis	Ehrendorfer (1973)	D. cambrensis added, D. remota removed
Dryopteris filix-mas aggr.	aggr.	Dryopteris borreri	Ehrendorfer (1973)	D. cambrensis added, D. remota removed
Dryopteris filix-mas aggr.	aggr.	Dryopteris cambrensis	Ehrendorfer (1973)	D. cambrensis added, D. remota removed
Dryopteris filix-mas aggr.	aggr.	Dryopteris filix-mas	Ehrendorfer (1973)	D. cambrensis added, D. remota removed
Dryopteris filix-mas aggr.	aggr.	Dryopteris oreades	Ehrendorfer (1973)	D. cambrensis added, D. remota removed
Dryopteris filix-mas aggr.	aggr.	Dryopteris x complexa	Ehrendorfer (1973)	D. cambrensis added, D. remota removed
Dryopteris villarii aggr.	aggr.	Dryopteris mindshelkensis	Landolt et al. (2010)
Dryopteris villarii aggr.	aggr.	Dryopteris pallida	Landolt et al. (2010)
Dryopteris villarii aggr.	aggr.	Dryopteris tyrrhena	Landolt et al. (2010)
Dryopteris villarii aggr.	aggr.	Dryopteris villarii	Landolt et al. (2010)
Echinochloa crus-galli aggr.	aggr.	Echinochloa crus-galli	Landolt et al. (2010)
Echinochloa crus-galli aggr.	aggr.	Echinochloa muricata	Landolt et al. (2010)
Echinops sphaerocephalus aggr.	aggr.	Echinops bannaticus	Landolt et al. (2010)
Echinops sphaerocephalus aggr.	aggr.	Echinops exaltatus	Landolt et al. (2010)
Echinops sphaerocephalus aggr.	aggr.	Echinops ritro	Landolt et al. (2010)
Echinops sphaerocephalus aggr.	aggr.	Echinops sphaerocephalus	Landolt et al. (2010)
Elaeagnus pungens aggr.	aggr.	Elaeagnus pungens	[ad hoc]
Elaeagnus pungens aggr.	aggr.	Elaeagnus x submacrophylla	[ad hoc]
Elatine hydropiper aggr. s.l.	aggr. s.l.	Elatine ambigua	Landolt et al. (2010)
Elatine hydropiper aggr. s.l.	aggr. s.l.	Elatine hexandra	Landolt et al. (2010)
Elatine hydropiper aggr. s.l.	aggr. s.l.	Elatine hydropiper aggr.	Landolt et al. (2010)
Elatine hydropiper aggr. s.l.	aggr. s.l.	Elatine triandra	Landolt et al. (2010)
Elatine hydropiper aggr.	aggr.	Elatine hydropiper	Euro+Med (2022)
Elatine hydropiper aggr.	aggr.	Elatine orthosperma	Euro+Med (2022)
Eleocharis ovata aggr.	aggr.	Eleocharis olivacea	Ehrendorfer (1973)
Eleocharis ovata aggr.	aggr.	Eleocharis ovata	Ehrendorfer (1973)
Eleocharis palustris aggr.	aggr.	Eleocharis mamillata	Juillerat et al. (2017)
Eleocharis palustris aggr.	aggr.	Eleocharis palustris	Juillerat et al. (2017)
Eleocharis palustris aggr.	aggr.	Eleocharis uniglumis	Juillerat et al. (2017)
Elytrigia repens aggr.	aggr.	Elytrigia atherica	Landolt et al. (2010)
Elytrigia repens aggr.	aggr.	Elytrigia intermedia	Landolt et al. (2010)
Elytrigia repens aggr.	aggr.	Elytrigia repens	Landolt et al. (2010)
Empetrum nigrum aggr.	aggr.	Empetrum hermaphroditum	Landolt et al. (2010)
Empetrum nigrum aggr.	aggr.	Empetrum nigrum	Landolt et al. (2010)
Epilobium ciliatum aggr.	aggr.	Epilobium ciliatum	Euro+Med (2022)
Epilobium ciliatum aggr.	aggr.	Epilobium pseudorubescens	Euro+Med (2022)
Epilobium montanum aggr.	aggr.	Epilobium collinum	Landolt et al. (2010)
Epilobium montanum aggr.	aggr.	Epilobium duriaei	Landolt et al. (2010)
Epilobium montanum aggr.	aggr.	Epilobium lanceolatum	Landolt et al. (2010)
Epilobium montanum aggr.	aggr.	Epilobium montanum	Landolt et al. (2010)
Epilobium tetragonum aggr.	aggr.	Epilobium obscurum	Landolt et al. (2010)
Epilobium tetragonum aggr.	aggr.	Epilobium tetragonum	Landolt et al. (2010)
Epipactis helleborine aggr.	aggr.	Epipactis autumnalis	Ehrendorfer (1973)	Combined with Landolt et al. (2010) & Juillerat et al. (2017)
Epipactis helleborine aggr.	aggr.	Epipactis bucacensis	Ehrendorfer (1973)	Combined with Landolt et al. (2010) & Juillerat et al. (2017)
Epipactis helleborine aggr.	aggr.	Epipactis dunensis	Ehrendorfer (1973)	Combined with Landolt et al. (2010) & Juillerat et al. (2017)
Epipactis helleborine aggr.	aggr.	Epipactis fageticola	Ehrendorfer (1973)	Combined with Landolt et al. (2010) & Juillerat et al. (2017)
Epipactis helleborine aggr.	aggr.	Epipactis flaminia	Ehrendorfer (1973)	Combined with Landolt et al. (2010) & Juillerat et al. (2017)
Epipactis helleborine aggr.	aggr.	Epipactis helleborine	Ehrendorfer (1973)	Combined with Landolt et al. (2010) & Juillerat et al. (2017)
Epipactis helleborine aggr.	aggr.	Epipactis leptochila	Ehrendorfer (1973)	Combined with Landolt et al. (2010) & Juillerat et al. (2017)
Epipactis helleborine aggr.	aggr.	Epipactis muelleri	Ehrendorfer (1973)	Combined with Landolt et al. (2010) & Juillerat et al. (2017)
Epipactis helleborine aggr.	aggr.	Epipactis nordeniorum	Ehrendorfer (1973)	Combined with Landolt et al. (2010) & Juillerat et al. (2017)
Epipactis helleborine aggr.	aggr.	Epipactis phyllantes	Ehrendorfer (1973)	Combined with Landolt et al. (2010) & Juillerat et al. (2017)
Epipactis helleborine aggr.	aggr.	Epipactis placentina	Ehrendorfer (1973)	Combined with Landolt et al. (2010) & Juillerat et al. (2017)
Epipactis helleborine aggr.	aggr.	Epipactis pontica	Ehrendorfer (1973)	Combined with Landolt et al. (2010) & Juillerat et al. (2017)
Epipactis helleborine aggr.	aggr.	Epipactis provincialis	Ehrendorfer (1973)	Combined with Landolt et al. (2010) & Juillerat et al. (2017)
Epipactis helleborine aggr.	aggr.	Epipactis stellifera	Ehrendorfer (1973)	Combined with Landolt et al. (2010) & Juillerat et al. (2017)
Epipactis helleborine aggr.	aggr.	Epipactis tallosii	Ehrendorfer (1973)	Combined with Landolt et al. (2010) & Juillerat et al. (2017)
Epipactis helleborine aggr. s.l.	aggr. s.l.	Epipactis atrorubens	Landolt et al. (2010)
Epipactis helleborine aggr. s.l.	aggr. s.l.	Epipactis helleborine aggr.	Landolt et al. (2010)
Epipactis helleborine aggr. s.l.	aggr. s.l.	Epipactis microphylla	Landolt et al. (2010)
Epipactis helleborine aggr. s.l.	aggr. s.l.	Epipactis purpurata	Landolt et al. (2010)
Eragrostis mexicana aggr.	aggr.	Eragrostis mexicana	Landolt et al. (2010)
Eragrostis mexicana aggr.	aggr.	Eragrostis virescens	Landolt et al. (2010)
Eragrostis minor aggr.	aggr.	Eragrostis barrelieri	Landolt et al. (2010)
Eragrostis minor aggr.	aggr.	Eragrostis cilianensis	Landolt et al. (2010)
Eragrostis minor aggr.	aggr.	Eragrostis minor	Landolt et al. (2010)
Eragrostis pilosa aggr.	aggr.	Eragrostis frankii	Landolt et al. (2010)
Eragrostis pilosa aggr.	aggr.	Eragrostis multicaulis	Landolt et al. (2010)
Eragrostis pilosa aggr.	aggr.	Eragrostis pectinacea	Landolt et al. (2010)
Eragrostis pilosa aggr.	aggr.	Eragrostis pilosa	Landolt et al. (2010)
Eragrostis pilosa aggr.	aggr.	Eragrostis tef	Landolt et al. (2010)
Erigeron alpinus aggr.	aggr.	Erigeron alpinus	Juillerat et al. (2017)
Erigeron alpinus aggr.	aggr.	Erigeron glabratus	Juillerat et al. (2017)
Erigeron alpinus aggr.	aggr.	Erigeron neglectus	Juillerat et al. (2017)
Erigeron alpinus aggr.	aggr.	Erigeron uniflorus	Juillerat et al. (2017)
Erigeron canadensis aggr.	aggr.	Erigeron bonariensis	Ehrendorfer (1973)	Genus changed, added E. floribundus
Erigeron canadensis aggr.	aggr.	Erigeron canadensis	Ehrendorfer (1973)	Genus changed, added E. floribundus
Erigeron canadensis aggr.	aggr.	Erigeron floribundus	Ehrendorfer (1973)	Genus changed, added E. floribundus
Erigeron canadensis aggr.	aggr.	Erigeron sumatrensis	Ehrendorfer (1973)	Genus changed, added E. floribundus
Eriophorum angustifolium aggr.	aggr.	Eriophorum angustifolium	Landolt et al. (2010)
Eriophorum angustifolium aggr.	aggr.	Eriophorum gracile	Landolt et al. (2010)
Eriophorum angustifolium aggr.	aggr.	Eriophorum latifolium	Landolt et al. (2010)
Erodium cicutarium aggr.	aggr.	Erodium acaule	Landolt et al. (2010)
Erodium cicutarium aggr.	aggr.	Erodium cicutarium	Landolt et al. (2010)
Erysimum hieracifolium aggr.	aggr.	Erysimum hieracifolium	Ehrendorfer (1973)
Erysimum hieracifolium aggr.	aggr.	Erysimum hungaricum	Ehrendorfer (1973)
Erysimum hieracifolium aggr.	aggr.	Erysimum marschallianum	Ehrendorfer (1973)
Erysimum odoratum aggr. s.l.	aggr. s.l.	Erysimum aureum	Landolt et al. (2010)
Erysimum odoratum aggr. s.l.	aggr. s.l.	Erysimum carniolicum	Landolt et al. (2010)
Erysimum odoratum aggr. s.l.	aggr. s.l.	Erysimum crepidifolium	Landolt et al. (2010)
Erysimum odoratum aggr. s.l.	aggr. s.l.	Erysimum hieracifolium aggr.	Landolt et al. (2010)
Erysimum odoratum aggr. s.l.	aggr. s.l.	Erysimum odoratum	Landolt et al. (2010)
Erysimum sylvestre aggr.	aggr.	Erysimum insubricum	Ehrendorfer (1973)	Combined with Juillerat et al. (2017)
Erysimum sylvestre aggr.	aggr.	Erysimum jugicola	Ehrendorfer (1973)	Combined with Juillerat et al. (2017)
Erysimum sylvestre aggr.	aggr.	Erysimum rhaeticum	Ehrendorfer (1973)	Combined with Juillerat et al. (2017)
Erysimum sylvestre aggr.	aggr.	Erysimum sylvestre	Ehrendorfer (1973)	Combined with Juillerat et al. (2017)
Erysimum sylvestre aggr. s.l.	aggr. s.l.	Erysimum diffusum	Landolt et al. (2010)
Erysimum sylvestre aggr. s.l.	aggr. s.l.	Erysimum humile	Landolt et al. (2010)
Erysimum sylvestre aggr. s.l.	aggr. s.l.	Erysimum montosicola	Landolt et al. (2010)
Erysimum sylvestre aggr. s.l.	aggr. s.l.	Erysimum ruscinonense	Landolt et al. (2010)
Erysimum sylvestre aggr. s.l.	aggr. s.l.	Erysimum sylvestre aggr.	Landolt et al. (2010)
Euphorbia dulcis aggr.	aggr.	Euphorbia angulata	Landolt et al. (2010)
Euphorbia dulcis aggr.	aggr.	Euphorbia dulcis	Landolt et al. (2010)
Euphorbia epithymoides aggr.	aggr.	Euphorbia austriaca	Landolt et al. (2010)
Euphorbia epithymoides aggr.	aggr.	Euphorbia epithymoides	Landolt et al. (2010)
Euphorbia epithymoides aggr.	aggr.	Euphorbia fragifera	Landolt et al. (2010)
Euphorbia esula aggr.	aggr.	Euphorbia cyparissias	Landolt et al. (2010)
Euphorbia esula aggr.	aggr.	Euphorbia esula	Landolt et al. (2010)
Euphorbia esula aggr.	aggr.	Euphorbia graminifolia	Landolt et al. (2010)
Euphorbia esula aggr.	aggr.	Euphorbia lamarckii	Landolt et al. (2010)
Euphorbia falcata aggr.	aggr.	Euphorbia falcata	Landolt et al. (2010)
Euphorbia falcata aggr.	aggr.	Euphorbia sulcata	Landolt et al. (2010)
Euphorbia maculata aggr.	aggr.	Euphorbia chamaesyce	Juillerat et al. (2017)
Euphorbia maculata aggr.	aggr.	Euphorbia humifusa	Juillerat et al. (2017)
Euphorbia maculata aggr.	aggr.	Euphorbia maculata	Juillerat et al. (2017)
Euphorbia maculata aggr.	aggr.	Euphorbia marginata	Juillerat et al. (2017)
Euphorbia maculata aggr.	aggr.	Euphorbia prostrata	Juillerat et al. (2017)
Euphorbia maculata aggr.	aggr.	Euphorbia serpens	Juillerat et al. (2017)
Euphorbia maculata aggr.	aggr.	Euphorbia serpyllifolia	Juillerat et al. (2017)
Euphorbia platyphyllos aggr.	aggr.	Euphorbia platyphyllos	Landolt et al. (2010)
Euphorbia platyphyllos aggr.	aggr.	Euphorbia stricta	Landolt et al. (2010)
Euphorbia saxatilis aggr.	aggr.	Euphorbia barrelieri	Landolt et al. (2010)
Euphorbia saxatilis aggr.	aggr.	Euphorbia saxatilis	Landolt et al. (2010)
Euphorbia saxatilis aggr.	aggr.	Euphorbia triflora	Landolt et al. (2010)
Euphorbia verrucosa aggr.	aggr.	Euphorbia carniolica	Landolt et al. (2010)
Euphorbia verrucosa aggr.	aggr.	Euphorbia flavicoma	Landolt et al. (2010)
Euphorbia verrucosa aggr.	aggr.	Euphorbia verrucosa	Landolt et al. (2010)
Euphrasia alpina aggr.	aggr.	Euphrasia alpina	Landolt et al. (2010)
Euphrasia alpina aggr.	aggr.	Euphrasia christii	Landolt et al. (2010)
Euphrasia alpina aggr.	aggr.	Euphrasia cisalpina	Landolt et al. (2010)
Euphrasia minima aggr.	aggr.	Euphrasia drosocalyx	Ehrendorfer (1973)	Combined with Landolt et al. (2010)
Euphrasia minima aggr.	aggr.	Euphrasia frigida	Ehrendorfer (1973)	Combined with Landolt et al. (2010)
Euphrasia minima aggr.	aggr.	Euphrasia inopinata	Ehrendorfer (1973)	Combined with Landolt et al. (2010)
Euphrasia minima aggr.	aggr.	Euphrasia minima	Ehrendorfer (1973)	Combined with Landolt et al. (2010)
Euphrasia minima aggr.	aggr.	Euphrasia pulchella	Ehrendorfer (1973)	Combined with Landolt et al. (2010)
Euphrasia minima aggr.	aggr.	Euphrasia sinuata	Ehrendorfer (1973)	Combined with Landolt et al. (2010)
Euphrasia nemorosa aggr.	aggr.	Euphrasia micrantha	Landolt et al. (2010)
Euphrasia nemorosa aggr.	aggr.	Euphrasia nemorosa	Landolt et al. (2010)
Euphrasia rostkoviana aggr.	aggr.	Euphrasia anglica	Ehrendorfer (1973)	Added E. anglica
Euphrasia rostkoviana aggr.	aggr.	Euphrasia kerneri	Ehrendorfer (1973)	Added E. anglica
Euphrasia rostkoviana aggr.	aggr.	Euphrasia picta	Ehrendorfer (1973)	Added E. anglica
Euphrasia rostkoviana aggr.	aggr.	Euphrasia rostkoviana	Ehrendorfer (1973)	Added E. anglica
Euphrasia rostkoviana aggr.	aggr.	Euphrasia simonkaiana	Ehrendorfer (1973)	Added E. anglica
Euphrasia rostkoviana aggr.	aggr.	Euphrasia stipitata	Ehrendorfer (1973)	Added E. anglica
Euphrasia salisburgensis aggr.	aggr.	Euphrasia illyrica	Ehrendorfer (1973)
Euphrasia salisburgensis aggr.	aggr.	Euphrasia portae	Ehrendorfer (1973)
Euphrasia salisburgensis aggr.	aggr.	Euphrasia salisburgensis	Ehrendorfer (1973)
Euphrasia salisburgensis aggr. s.l.	aggr. s.l.	Euphrasia salisburgensis aggr.	Landolt et al. (2010)
Euphrasia salisburgensis aggr. s.l.	aggr. s.l.	Euphrasia tricuspidata aggr.	Landolt et al. (2010)
Euphrasia stricta aggr.	aggr.	Euphrasia arctica	Ehrendorfer (1973)
Euphrasia stricta aggr.	aggr.	Euphrasia liburnica	Ehrendorfer (1973)
Euphrasia stricta aggr.	aggr.	Euphrasia pectinata	Ehrendorfer (1973)
Euphrasia stricta aggr.	aggr.	Euphrasia stricta	Ehrendorfer (1973)
Euphrasia tricuspidata aggr.	aggr.	Euphrasia cuspidata	Ehrendorfer (1973)	Excl. E. italica (syn. of E. portae)
Euphrasia tricuspidata aggr.	aggr.	Euphrasia tricuspidata	Ehrendorfer (1973)	Excl. E. italica (syn. of E. portae)
Festuca halleri aggr.	aggr.	Festuca halleri	Juillerat et al. (2017)
Festuca halleri aggr.	aggr.	Festuca intercedens	Juillerat et al. (2017)
Festuca halleri aggr.	aggr.	Festuca pseudodura	Juillerat et al. (2017)
Festuca halleri aggr.	aggr.	Festuca stenantha	Juillerat et al. (2017)
Festuca halleri aggr. s.l.	aggr. s.l.	Festuca alpina	Landolt et al. (2010)
Festuca halleri aggr. s.l.	aggr. s.l.	Festuca austrodolomitica	Landolt et al. (2010)
Festuca halleri aggr. s.l.	aggr. s.l.	Festuca halleri aggr.	Landolt et al. (2010)
Festuca halleri aggr. s.l.	aggr. s.l.	Festuca rupicaprina	Landolt et al. (2010)
Festuca halleri aggr. s.l.	aggr. s.l.	Festuca yvesii	Landolt et al. (2010)
Festuca ovina aggr.	aggr.	Festuca airoides	Ehrendorfer (1973)	Complemented with Landolt et al. (2010) & Wisskirchen & Haeupler (1998)
Festuca ovina aggr.	aggr.	Festuca arvernensis	Ehrendorfer (1973)	Complemented with Landolt et al. (2010) & Wisskirchen & Haeupler (1998)
Festuca ovina aggr.	aggr.	Festuca bauzanina	Ehrendorfer (1973)	Complemented with Landolt et al. (2010) & Wisskirchen & Haeupler (1998)
Festuca ovina aggr.	aggr.	Festuca breistrofferi	Ehrendorfer (1973)	Complemented with Landolt et al. (2010) & Wisskirchen & Haeupler (1998)
Festuca ovina aggr.	aggr.	Festuca burgundiana	Ehrendorfer (1973)	Complemented with Landolt et al. (2010) & Wisskirchen & Haeupler (1998)
Festuca ovina aggr.	aggr.	Festuca cinerea	Ehrendorfer (1973)	Complemented with Landolt et al. (2010) & Wisskirchen & Haeupler (1998)
Festuca ovina aggr.	aggr.	Festuca circummediterranea	Ehrendorfer (1973)	Complemented with Landolt et al. (2010) & Wisskirchen & Haeupler (1998)
Festuca ovina aggr.	aggr.	Festuca csikhegyensis	Ehrendorfer (1973)	Complemented with Landolt et al. (2010) & Wisskirchen & Haeupler (1998)
Festuca ovina aggr.	aggr.	Festuca dalmatica	Ehrendorfer (1973)	Complemented with Landolt et al. (2010) & Wisskirchen & Haeupler (1998)
Festuca ovina aggr.	aggr.	Festuca duvalii	Ehrendorfer (1973)	Complemented with Landolt et al. (2010) & Wisskirchen & Haeupler (1998)
Festuca ovina aggr.	aggr.	Festuca eggleri	Ehrendorfer (1973)	Complemented with Landolt et al. (2010) & Wisskirchen & Haeupler (1998)
Festuca ovina aggr.	aggr.	Festuca filiformis	Ehrendorfer (1973)	Complemented with Landolt et al. (2010) & Wisskirchen & Haeupler (1998)
Festuca ovina aggr.	aggr.	Festuca guinochetii	Ehrendorfer (1973)	Complemented with Landolt et al. (2010) & Wisskirchen & Haeupler (1998)
Festuca ovina aggr.	aggr.	Festuca heteropachys	Ehrendorfer (1973)	Complemented with Landolt et al. (2010) & Wisskirchen & Haeupler (1998)
Festuca ovina aggr.	aggr.	Festuca inops	Ehrendorfer (1973)	Complemented with Landolt et al. (2010) & Wisskirchen & Haeupler (1998)
Festuca ovina aggr.	aggr.	Festuca laevigata	Ehrendorfer (1973)	Complemented with Landolt et al. (2010) & Wisskirchen & Haeupler (1998)
Festuca ovina aggr.	aggr.	Festuca lemanii	Ehrendorfer (1973)	Complemented with Landolt et al. (2010) & Wisskirchen & Haeupler (1998)
Festuca ovina aggr.	aggr.	Festuca longifolia	Ehrendorfer (1973)	Complemented with Landolt et al. (2010) & Wisskirchen & Haeupler (1998)
Festuca ovina aggr.	aggr.	Festuca marginata	Ehrendorfer (1973)	Complemented with Landolt et al. (2010) & Wisskirchen & Haeupler (1998)
Festuca ovina aggr.	aggr.	Festuca ovina	Ehrendorfer (1973)	Complemented with Landolt et al. (2010) & Wisskirchen & Haeupler (1998)
Festuca ovina aggr.	aggr.	Festuca pallens	Ehrendorfer (1973)	Complemented with Landolt et al. (2010) & Wisskirchen & Haeupler (1998)
Festuca ovina aggr.	aggr.	Festuca polesica	Ehrendorfer (1973)	Complemented with Landolt et al. (2010) & Wisskirchen & Haeupler (1998)
Festuca ovina aggr.	aggr.	Festuca psammophila	Ehrendorfer (1973)	Complemented with Landolt et al. (2010) & Wisskirchen & Haeupler (1998)
Festuca ovina aggr.	aggr.	Festuca pseudodalmatica	Ehrendorfer (1973)	Complemented with Landolt et al. (2010) & Wisskirchen & Haeupler (1998)
Festuca ovina aggr.	aggr.	Festuca stricta	Ehrendorfer (1973)	Complemented with Landolt et al. (2010) & Wisskirchen & Haeupler (1998)
Festuca ovina aggr.	aggr.	Festuca ticinensis	Ehrendorfer (1973)	Complemented with Landolt et al. (2010) & Wisskirchen & Haeupler (1998)
Festuca ovina aggr.	aggr.	Festuca vaginata	Ehrendorfer (1973)	Complemented with Landolt et al. (2010) & Wisskirchen & Haeupler (1998)
Festuca ovina aggr.	aggr.	Festuca valesiaca	Ehrendorfer (1973)	Complemented with Landolt et al. (2010) & Wisskirchen & Haeupler (1998)
Festuca ovina aggr.	aggr.	Festuca vivipara	Ehrendorfer (1973)	Complemented with Landolt et al. (2010) & Wisskirchen & Haeupler (1998)
Festuca ovina aggr.	aggr.	Festuca wagneri	Ehrendorfer (1973)	Complemented with Landolt et al. (2010) & Wisskirchen & Haeupler (1998)
Festuca rubra aggr.	aggr.	Festuca arenaria	Juillerat et al. (2017)	Combined with Wisskirchen & Haeupler (1998)
Festuca rubra aggr.	aggr.	Festuca heteromalla	Juillerat et al. (2017)	Combined with Wisskirchen & Haeupler (1998)
Festuca rubra aggr.	aggr.	Festuca nigrescens	Juillerat et al. (2017)	Combined with Wisskirchen & Haeupler (1998)
Festuca rubra aggr.	aggr.	Festuca rivularis	Juillerat et al. (2017)	Combined with Wisskirchen & Haeupler (1998)
Festuca rubra aggr.	aggr.	Festuca rubra	Juillerat et al. (2017)	Combined with Wisskirchen & Haeupler (1998)
Festuca rubra aggr.	aggr.	Festuca trichophylla	Juillerat et al. (2017)	Combined with Wisskirchen & Haeupler (1998)
Festuca varia aggr.	aggr.	Festuca acuminata	Landolt et al. (2010)	Combined with Landolt et al. (2010)
Festuca varia aggr.	aggr.	Festuca alpestris	Landolt et al. (2010)	Combined with Landolt et al. (2010)
Festuca varia aggr.	aggr.	Festuca bosniaca	Landolt et al. (2010)	Combined with Landolt et al. (2010)
Festuca varia aggr.	aggr.	Festuca calva	Landolt et al. (2010)	Combined with Landolt et al. (2010)
Festuca varia aggr.	aggr.	Festuca flavescens	Landolt et al. (2010)	Combined with Landolt et al. (2010)
Festuca varia aggr.	aggr.	Festuca luedii	Landolt et al. (2010)	Combined with Landolt et al. (2010)
Festuca varia aggr.	aggr.	Festuca pallidula	Landolt et al. (2010)	Combined with Landolt et al. (2010)
Festuca varia aggr.	aggr.	Festuca pseudovaria	Landolt et al. (2010)	Combined with Landolt et al. (2010)
Festuca varia aggr.	aggr.	Festuca quadriflora	Landolt et al. (2010)	Combined with Landolt et al. (2010)
Festuca varia aggr.	aggr.	Festuca scabriculmis	Landolt et al. (2010)	Combined with Landolt et al. (2010)
Festuca varia aggr.	aggr.	Festuca varia	Landolt et al. (2010)	Combined with Landolt et al. (2010)
Festuca varia aggr.	aggr.	Festuca versicolor	Landolt et al. (2010)	Combined with Landolt et al. (2010)
Festuca varia aggr.	aggr.	Festuca winnebachensis	Landolt et al. (2010)	Combined with Landolt et al. (2010)
Festuca violacea aggr.	aggr.	Festuca melanopsis	Landolt et al. (2010)	Combined with Landolt et al. (2010)
Festuca violacea aggr.	aggr.	Festuca nitida	Landolt et al. (2010)	Combined with Landolt et al. (2010)
Festuca violacea aggr.	aggr.	Festuca norica	Landolt et al. (2010)	Combined with Landolt et al. (2010)
Festuca violacea aggr.	aggr.	Festuca picturata	Landolt et al. (2010)	Combined with Landolt et al. (2010)
Festuca violacea aggr.	aggr.	Festuca violacea	Landolt et al. (2010)	Combined with Landolt et al. (2010)
Filago germanica aggr.	aggr.	Filago eriocephala	Euro+Med (2022)
Filago germanica aggr.	aggr.	Filago germanica	Euro+Med (2022)
Filago germanica aggr.	aggr.	Filago lutescens	Euro+Med (2022)
Filago germanica aggr.	aggr.	Filago obovata	Euro+Med (2022)
Filago germanica aggr.	aggr.	Filago prolifera	Euro+Med (2022)
Filago germanica aggr.	aggr.	Filago pyramidata	Euro+Med (2022)
Fraxinus excelsior aggr.	aggr.	Fraxinus angustifolia	Landolt et al. (2010)
Fraxinus excelsior aggr.	aggr.	Fraxinus excelsior	Landolt et al. (2010)
Fritillaria meleagris aggr.	aggr.	Fritillaria meleagris	Landolt et al. (2010)
Fritillaria meleagris aggr.	aggr.	Fritillaria tubaeformis	Landolt et al. (2010)
Fumana ericoides aggr.	aggr.	Fumana ericoides	Landolt et al. (2010)
Fumana ericoides aggr.	aggr.	Fumana procumbens	Landolt et al. (2010)
Fumana thymifolia aggr.	aggr.	Fumana laevis	[ad hoc]
Fumana thymifolia aggr.	aggr.	Fumana thymifolia	[ad hoc]
Fumaria officinalis aggr. s.l.	aggr. s.l.	Fumaria densiflora	Landolt et al. (2010)
Fumaria officinalis aggr. s.l.	aggr. s.l.	Fumaria officinalis	Landolt et al. (2010)
Fumaria officinalis aggr. s.l.	aggr. s.l.	Fumaria parviflora aggr.	Landolt et al. (2010)
Fumaria officinalis aggr. s.l.	aggr. s.l.	Fumaria rostellata	Landolt et al. (2010)
Fumaria officinalis aggr. s.l.	aggr. s.l.	Fumaria schleicheri	Landolt et al. (2010)
Fumaria parviflora aggr.	aggr.	Fumaria parviflora	Wisskirchen & Haeupler (1998)
Fumaria parviflora aggr.	aggr.	Fumaria vaillantii	Wisskirchen & Haeupler (1998)
Gagea pratensis aggr.	aggr.	Gagea pratensis	Landolt et al. (2010)
Gagea pratensis aggr.	aggr.	Gagea pusilla	Landolt et al. (2010)
Gagea villosa aggr.	aggr.	Gagea granatellii	Landolt et al. (2010)
Gagea villosa aggr.	aggr.	Gagea liotardii	Landolt et al. (2010)
Gagea villosa aggr.	aggr.	Gagea polidorii	Landolt et al. (2010)
Gagea villosa aggr.	aggr.	Gagea villosa	Landolt et al. (2010)
Galanthus nivalis aggr.	aggr.	Galanthus elwesii	Landolt et al. (2010)
Galanthus nivalis aggr.	aggr.	Galanthus nivalis	Landolt et al. (2010)
Galeopsis ladanum aggr.	aggr.	Galeopsis angustifolia	Ehrendorfer (1973)	Addition of G. reuteri
Galeopsis ladanum aggr.	aggr.	Galeopsis ladanum	Ehrendorfer (1973)	Addition of G. reuteri
Galeopsis ladanum aggr.	aggr.	Galeopsis reuteri	Ehrendorfer (1973)	Addition of G. reuteri
Galeopsis ladanum aggr. s.l.	aggr. s.l.	Galeopsis ladanum aggr.	Landolt et al. (2010)
Galeopsis ladanum aggr. s.l.	aggr. s.l.	Galeopsis segetum	Landolt et al. (2010)
Galeopsis tetrahit aggr.	aggr.	Galeopsis bifida	Ehrendorfer (1973)
Galeopsis tetrahit aggr.	aggr.	Galeopsis tetrahit	Ehrendorfer (1973)
Galeopsis tetrahit aggr. s.l.	aggr. s.l.	Galeopsis pubescens	Landolt et al. (2010)
Galeopsis tetrahit aggr. s.l.	aggr. s.l.	Galeopsis speciosa	Landolt et al. (2010)
Galeopsis tetrahit aggr. s.l.	aggr. s.l.	Galeopsis tetrahit aggr.	Landolt et al. (2010)
Galinsoga parviflora aggr.	aggr.	Galinsoga parviflora	Landolt et al. (2010)
Galinsoga parviflora aggr.	aggr.	Galinsoga quadriradiata	Landolt et al. (2010)
Galium aparine aggr.	aggr.	Galium aparine	Ehrendorfer (1973)
Galium aparine aggr.	aggr.	Galium spurium	Ehrendorfer (1973)
Galium baldense aggr.	aggr.	Galium baldense	Landolt et al. (2010)
Galium baldense aggr.	aggr.	Galium margaritaceum	Landolt et al. (2010)
Galium baldense aggr.	aggr.	Galium noricum	Landolt et al. (2010)
Galium baldense aggr.	aggr.	Galium tendae	Landolt et al. (2010)
Galium boreale aggr.	aggr.	Galium boreale	Ehrendorfer (1973)
Galium boreale aggr.	aggr.	Galium rubioides	Ehrendorfer (1973)
Galium glaucum aggr.	aggr.	Galium eruptivum	Landolt et al. (2010)
Galium glaucum aggr.	aggr.	Galium glaucum	Landolt et al. (2010)
Galium helveticum aggr.	aggr.	Galium megalospermum	Ehrendorfer (1973)
Galium helveticum aggr.	aggr.	Galium pseudohelveticum	Ehrendorfer (1973)
Galium laevigatum aggr.	aggr.	Galium aristatum	Juillerat et al. (2017)
Galium laevigatum aggr.	aggr.	Galium laevigatum	Juillerat et al. (2017)
Galium lucidum aggr.	aggr.	Galium corrudifolium	Landolt et al. (2010)
Galium lucidum aggr.	aggr.	Galium lucidum	Landolt et al. (2010)
Galium lucidum aggr.	aggr.	Galium meliodorum	Landolt et al. (2010)
Galium lucidum aggr.	aggr.	Galium montis-arerae	Landolt et al. (2010)
Galium lucidum aggr.	aggr.	Galium truniacum	Landolt et al. (2010)
Galium mollugo aggr.	aggr.	Galium album	Juillerat et al. (2017)
Galium mollugo aggr.	aggr.	Galium mollugo	Juillerat et al. (2017)
Galium mollugo aggr. s.l.	aggr. s.l.	Galium lucidum aggr.	Ehrendorfer (1973)	aggr. > aggr. s.l.
Galium mollugo aggr. s.l.	aggr. s.l.	Galium mollugo aggr.	Ehrendorfer (1973)	aggr. > aggr. s.l.
Galium palustre aggr.	aggr.	Galium debile	Landolt et al. (2010)
Galium palustre aggr.	aggr.	Galium elongatum	Landolt et al. (2010)
Galium palustre aggr.	aggr.	Galium palustre	Landolt et al. (2010)
Galium parisiense aggr.	aggr.	Galium divaricatum	Landolt et al. (2010)
Galium parisiense aggr.	aggr.	Galium parisiense	Landolt et al. (2010)
Galium pusillum aggr. s.l.	aggr. s.l.	Galium helveticum aggr.	Landolt et al. (2010)
Galium pusillum aggr. s.l.	aggr. s.l.	Galium pussilum aggr.	Landolt et al. (2010)
Galium pusillum aggr. s.l.	aggr. s.l.	Galium timeroyi	Landolt et al. (2010)
Galium pussilum aggr.	aggr.	Galium anisophyllon	Ehrendorfer (1973)
Galium pussilum aggr.	aggr.	Galium austriacum	Ehrendorfer (1973)
Galium pussilum aggr.	aggr.	Galium pumilum	Ehrendorfer (1973)
Galium pussilum aggr.	aggr.	Galium pussilum	Ehrendorfer (1973)
Galium pussilum aggr.	aggr.	Galium sterneri	Ehrendorfer (1973)
Galium pussilum aggr.	aggr.	Galium sudeticum	Ehrendorfer (1973)
Galium pussilum aggr.	aggr.	Galium suecicum	Ehrendorfer (1973)
Galium pussilum aggr.	aggr.	Galium valdepilosum	Ehrendorfer (1973)
Galium rubrum aggr.	aggr.	Galium obliquum	Ehrendorfer (1973)
Galium rubrum aggr.	aggr.	Galium rubrum	Ehrendorfer (1973)
Galium rubrum aggr.	aggr.	Galium x carmineum	Ehrendorfer (1973)
Galium rubrum aggr.	aggr.	Galium x centroniae	Ehrendorfer (1973)
Galium sylvaticum aggr. s.l.	aggr. s.l.	Galium abaujense	Ehrendorfer (1973)
Galium sylvaticum aggr. s.l.	aggr. s.l.	Galium intermedium	Ehrendorfer (1973)
Galium sylvaticum aggr. s.l.	aggr. s.l.	Galium laevigatum aggr.	Ehrendorfer (1973)
Galium sylvaticum aggr. s.l.	aggr. s.l.	Galium sylvaticum	Ehrendorfer (1973)
Galium verum aggr.	aggr.	Galium verum	Ehrendorfer (1973)
Galium verum aggr.	aggr.	Galium x pomeranicum	Ehrendorfer (1973)
Gentiana acaulis aggr.	aggr.	Gentiana acaulis	Landolt et al. (2010)
Gentiana acaulis aggr.	aggr.	Gentiana alpina	Landolt et al. (2010)
Gentiana acaulis aggr.	aggr.	Gentiana angustifolia	Landolt et al. (2010)
Gentiana acaulis aggr.	aggr.	Gentiana clusii	Landolt et al. (2010)
Gentiana acaulis aggr.	aggr.	Gentiana ligustica	Landolt et al. (2010)
Gentiana punctata aggr.	aggr.	Gentiana burseri	Landolt et al. (2010)
Gentiana punctata aggr.	aggr.	Gentiana punctata	Landolt et al. (2010)
Gentiana verna aggr.	aggr.	Gentiana bavarica	Landolt et al. (2010)
Gentiana verna aggr.	aggr.	Gentiana brachyphylla	Landolt et al. (2010)
Gentiana verna aggr.	aggr.	Gentiana orbicularis	Landolt et al. (2010)
Gentiana verna aggr.	aggr.	Gentiana pumila	Landolt et al. (2010)
Gentiana verna aggr.	aggr.	Gentiana rostanii	Landolt et al. (2010)
Gentiana verna aggr.	aggr.	Gentiana terglouensis	Landolt et al. (2010)
Gentiana verna aggr.	aggr.	Gentiana verna	Landolt et al. (2010)
Gentianella amarella aggr.	aggr.	Gentianella amarella	Ehrendorfer (1973)
Gentianella amarella aggr.	aggr.	Gentianella uliginosa	Ehrendorfer (1973)
Gentianella germanica aggr.	aggr.	Gentianella anisodonta	Ehrendorfer (1973)	Excl. G. insubrica (syn. of G. campestris)
Gentianella germanica aggr.	aggr.	Gentianella aspera	Ehrendorfer (1973)	Excl. G. insubrica (syn. of G. campestris)
Gentianella germanica aggr.	aggr.	Gentianella austriaca	Ehrendorfer (1973)	Excl. G. insubrica (syn. of G. campestris)
Gentianella germanica aggr.	aggr.	Gentianella engadinensis	Ehrendorfer (1973)	Excl. G. insubrica (syn. of G. campestris)
Gentianella germanica aggr.	aggr.	Gentianella germanica	Ehrendorfer (1973)	Excl. G. insubrica (syn. of G. campestris)
Gentianella germanica aggr.	aggr.	Gentianella lutescens	Ehrendorfer (1973)	Excl. G. insubrica (syn. of G. campestris)
Gentianella germanica aggr.	aggr.	Gentianella pilosa	Ehrendorfer (1973)	Excl. G. insubrica (syn. of G. campestris)
Gentianella germanica aggr.	aggr.	Gentianella ramosa	Ehrendorfer (1973)	Excl. G. insubrica (syn. of G. campestris)
Gentianella germanica aggr. s.l.	aggr. s.l.	Gentianella amarella aggr.	Landolt et al. (2010)
Gentianella germanica aggr. s.l.	aggr. s.l.	Gentianella germanica aggr.	Landolt et al. (2010)
Geranium molle aggr.	aggr.	Geranium aequale	Landolt et al. (2010)
Geranium molle aggr.	aggr.	Geranium molle	Landolt et al. (2010)
Geranium robertianum aggr.	aggr.	Geranium purpureum	Landolt et al. (2010)
Geranium robertianum aggr.	aggr.	Geranium robertianum	Landolt et al. (2010)
Geranium sylvaticum aggr.	aggr.	Geranium rivulare	Landolt et al. (2010)
Geranium sylvaticum aggr.	aggr.	Geranium sylvaticum	Landolt et al. (2010)
Geum urbanum aggr.	aggr.	Geum aleppicum	Landolt et al. (2010)
Geum urbanum aggr.	aggr.	Geum sylvaticum	Landolt et al. (2010)
Geum urbanum aggr.	aggr.	Geum urbanum	Landolt et al. (2010)
Gladiolus communis aggr.	aggr.	Gladiolus communis	Landolt et al. (2010)
Gladiolus communis aggr.	aggr.	Gladiolus illyricus	Landolt et al. (2010)
Gladiolus communis aggr.	aggr.	Gladiolus imbricatus	Landolt et al. (2010)
Gladiolus communis aggr.	aggr.	Gladiolus italicus	Landolt et al. (2010)
Gladiolus communis aggr.	aggr.	Gladiolus palustris	Landolt et al. (2010)
Glechoma hederacea aggr.	aggr.	Glechoma hederacea	Landolt et al. (2010)
Glechoma hederacea aggr.	aggr.	Glechoma hirsuta	Landolt et al. (2010)
Globularia cordifolia aggr.	aggr.	Globularia cordifolia	Landolt et al. (2010)
Globularia cordifolia aggr.	aggr.	Globularia meridionalis	Landolt et al. (2010)
Globularia cordifolia aggr.	aggr.	Globularia repens	Landolt et al. (2010)
Globularia vulgaris aggr.	aggr.	Globularia bisnagarica	Landolt et al. (2010)
Globularia vulgaris aggr.	aggr.	Globularia vulgaris	Landolt et al. (2010)
Glyceria fluitans aggr.	aggr.	Glyceria declinata	Wisskirchen & Haeupler (1998)
Glyceria fluitans aggr.	aggr.	Glyceria fluitans	Wisskirchen & Haeupler (1998)
Glyceria fluitans aggr.	aggr.	Glyceria nemoralis	Wisskirchen & Haeupler (1998)
Glyceria fluitans aggr.	aggr.	Glyceria notata	Wisskirchen & Haeupler (1998)
Glyceria fluitans aggr.	aggr.	Glyceria x pedicellata	Wisskirchen & Haeupler (1998)
Gnaphalium purpureum aggr.	aggr.	Gnaphalium americanum	Euro+Med (2022)
Gnaphalium purpureum aggr.	aggr.	Gnaphalium antillanum	Euro+Med (2022)
Gnaphalium purpureum aggr.	aggr.	Gnaphalium calviceps	Euro+Med (2022)
Gnaphalium purpureum aggr.	aggr.	Gnaphalium coarctatum	Euro+Med (2022)
Gnaphalium purpureum aggr.	aggr.	Gnaphalium filagineum	Euro+Med (2022)
Gnaphalium purpureum aggr.	aggr.	Gnaphalium pensylvanicum	Euro+Med (2022)
Gnaphalium purpureum aggr.	aggr.	Gnaphalium purpureum	Euro+Med (2022)
Gnaphalium purpureum aggr.	aggr.	Gnaphalium ustulatum	Euro+Med (2022)
Gnaphalium supinum aggr.	aggr.	Gnaphalium hoppeanum	Landolt et al. (2010)
Gnaphalium supinum aggr.	aggr.	Gnaphalium supinum	Landolt et al. (2010)
Gnaphalium sylvaticum aggr.	aggr.	Gnaphalium norvegicum	Landolt et al. (2010)
Gnaphalium sylvaticum aggr.	aggr.	Gnaphalium sylvaticum	Landolt et al. (2010)
Gymnadenia nigra aggr.	aggr.	Gymnadenia archiducis-joannis	Landolt et al. (2010)
Gymnadenia nigra aggr.	aggr.	Gymnadenia austriaca	Landolt et al. (2010)
Gymnadenia nigra aggr.	aggr.	Gymnadenia buschmanniae	Landolt et al. (2010)
Gymnadenia nigra aggr.	aggr.	Gymnadenia corneliana	Landolt et al. (2010)
Gymnadenia nigra aggr.	aggr.	Gymnadenia lithopolitanica	Landolt et al. (2010)
Gymnadenia nigra aggr.	aggr.	Gymnadenia nigra	Landolt et al. (2010)
Gymnadenia nigra aggr.	aggr.	Gymnadenia rhellicani	Landolt et al. (2010)
Gymnadenia nigra aggr.	aggr.	Gymnadenia rubra	Landolt et al. (2010)
Gymnadenia nigra aggr.	aggr.	Gymnadenia stiriaca	Landolt et al. (2010)
Gymnadenia nigra aggr.	aggr.	Gymnadenia widderi	Landolt et al. (2010)
Hedysarum hedysaroides aggr.	aggr.	Hedysarum boutignyanum	Landolt et al. (2010)
Hedysarum hedysaroides aggr.	aggr.	Hedysarum hedysaroides	Landolt et al. (2010)
Helianthemum alpestre aggr.	aggr.	Helianthemum alpestre	Ehrendorfer (1973)
Helianthemum alpestre aggr.	aggr.	Helianthemum italicum	Ehrendorfer (1973)
Helianthemum alpestre aggr.	aggr.	Helianthemum oelandicum	Ehrendorfer (1973)
Helianthemum alpestre aggr.	aggr.	Helianthemum rupifragum	Ehrendorfer (1973)
Helianthemum oelandicum aggr. s.l.	aggr. s.l.	Helianthemum alpestre aggr.	Landolt et al. (2010)
Helianthemum oelandicum aggr. s.l.	aggr.	Helianthemum canum	Landolt et al. (2010)
Helianthus tuberosus aggr.	aggr.	Helianthus decapetalus	Juillerat et al. (2017)
Helianthus tuberosus aggr.	aggr.	Helianthus giganteus	Juillerat et al. (2017)
Helianthus tuberosus aggr.	aggr.	Helianthus laetiflorus	Juillerat et al. (2017)
Helianthus tuberosus aggr.	aggr.	Helianthus pauciflorus	Juillerat et al. (2017)
Helianthus tuberosus aggr.	aggr.	Helianthus tuberosus	Juillerat et al. (2017)
Helianthus tuberosus aggr.	aggr.	Helianthus x multiflorus	Juillerat et al. (2017)
Helianthus tuberosus aggr. s.l.	aggr. s.l.	Helianthus annuus	Landolt et al. (2010)
Helianthus tuberosus aggr. s.l.	aggr. s.l.	Helianthus tuberosus aggr.	Landolt et al. (2010)
Helichrysum arenarium aggr.	aggr.	Helichrysum arenarium	Euro+Med (2022)
Helichrysum arenarium aggr.	aggr.	Helichrysum aucheri	Euro+Med (2022)
Helichrysum arenarium aggr.	aggr.	Helichrysum nogaicum	Euro+Med (2022)
Helichrysum arenarium aggr.	aggr.	Helichrysum rubicundum	Euro+Med (2022)
Helichrysum arenarium aggr.	aggr.	Helichrysum tanaiticum	Euro+Med (2022)
Helichrysum arenarium aggr.	aggr.	Helichrysum tenderiense	Euro+Med (2022)
Helichrysum pendulum aggr.	aggr.	Helichrysum boissieri	Euro+Med (2022)
Helichrysum pendulum aggr.	aggr.	Helichrysum errerae	Euro+Med (2022)
Helichrysum pendulum aggr.	aggr.	Helichrysum fontanesii	Euro+Med (2022)
Helichrysum pendulum aggr.	aggr.	Helichrysum melitense	Euro+Med (2022)
Helichrysum pendulum aggr.	aggr.	Helichrysum nebrodense	Euro+Med (2022)
Helichrysum pendulum aggr.	aggr.	Helichrysum panormitanum	Euro+Med (2022)
Helichrysum pendulum aggr.	aggr.	Helichrysum pendulum	Euro+Med (2022)
Helichrysum pendulum aggr.	aggr.	Helichrysum pomelianum	Euro+Med (2022)
Helichrysum pendulum aggr.	aggr.	Helichrysum saxatile	Euro+Med (2022)
Helictochloa pratensis aggr.	aggr.	Helictochloa adsurgens	Ehrendorfer (1973)	Genus changed
Helictochloa pratensis aggr.	aggr.	Helictochloa planiculme	Ehrendorfer (1973)	Genus changed
Helictochloa pratensis aggr.	aggr.	Helictochloa praeusta	Ehrendorfer (1973)	Genus changed
Helictochloa pratensis aggr.	aggr.	Helictochloa pratensis	Ehrendorfer (1973)	Genus changed
Helictotrichon sempervirens aggr.	aggr.	Helictotrichon petzense	Landolt et al. (2010)
Helictotrichon sempervirens aggr.	aggr.	Helictotrichon sempervirens	Landolt et al. (2010)
Helictotrichon sempervirens aggr.	aggr.	Helictotrichon setaceum	Landolt et al. (2010)
Heliosperma pusillum aggr.	aggr.	Heliosperma pusillum	Adler & al., Exk.fl. Österr. ed. 3: 339 (2008)
Heliosperma pusillum aggr.	aggr.	Heliosperma veselskyi	Adler & al., Exk.fl. Österr. ed. 3: 339 (2008)
Helosciadium nodiflorum aggr.	aggr.	Helosciadium nodiflorum	Landolt et al. (2010)
Helosciadium nodiflorum aggr.	aggr.	Helosciadium repens	Landolt et al. (2010)
Heracleum mantegazzianum aggr.	aggr.	Heracleum mantegazzianum	[ad hoc]
Heracleum mantegazzianum aggr.	aggr.	Heracleum pubescens	[ad hoc]
Hesperis matronalis aggr.	aggr.	Hesperis inodora	Landolt et al. (2010)
Hesperis matronalis aggr.	aggr.	Hesperis matronalis	Landolt et al. (2010)
Hesperis matronalis aggr.	aggr.	Hesperis sylvestris	Landolt et al. (2010)
Heteranthera limosa aggr.	aggr.	Heteranthera limosa	Landolt et al. (2010)
Heteranthera limosa aggr.	aggr.	Heteranthera reniformis	Landolt et al. (2010)
Heteranthera limosa aggr.	aggr.	Heteranthera rotundifolia	Landolt et al. (2010)
Hieracium acidotoides aggr.	aggr.	Hieracium acidotoides	Euro+Med (2022)
Hieracium acidotoides aggr.	aggr.	Hieracium aeolocephalum	Euro+Med (2022)
Hieracium acidotoides aggr.	aggr.	Hieracium basipinnatum	Euro+Med (2022)
Hieracium acidotoides aggr.	aggr.	Hieracium chaetophyllum	Euro+Med (2022)
Hieracium acidotoides aggr.	aggr.	Hieracium chlorolepidotum	Euro+Med (2022)
Hieracium acidotoides aggr.	aggr.	Hieracium cretatum	Euro+Med (2022)
Hieracium acidotoides aggr.	aggr.	Hieracium euglaucum	Euro+Med (2022)
Hieracium acidotoides aggr.	aggr.	Hieracium euprosopum	Euro+Med (2022)
Hieracium acidotoides aggr.	aggr.	Hieracium floccellum	Euro+Med (2022)
Hieracium acidotoides aggr.	aggr.	Hieracium floccilimbatum	Euro+Med (2022)
Hieracium acidotoides aggr.	aggr.	Hieracium habrodon	Euro+Med (2022)
Hieracium acidotoides aggr.	aggr.	Hieracium immodestum	Euro+Med (2022)
Hieracium acidotoides aggr.	aggr.	Hieracium megalomeres	Euro+Med (2022)
Hieracium acidotoides aggr.	aggr.	Hieracium nordenstamii	Euro+Med (2022)
Hieracium acidotoides aggr.	aggr.	Hieracium pallidivirens	Euro+Med (2022)
Hieracium acidotoides aggr.	aggr.	Hieracium paurodontum	Euro+Med (2022)
Hieracium acidotoides aggr.	aggr.	Hieracium pellaeocephalum	Euro+Med (2022)
Hieracium acidotoides aggr.	aggr.	Hieracium perornaticeps	Euro+Med (2022)
Hieracium acidotoides aggr.	aggr.	Hieracium poliobrachium	Euro+Med (2022)
Hieracium acidotoides aggr.	aggr.	Hieracium praecordans	Euro+Med (2022)
Hieracium acidotoides aggr.	aggr.	Hieracium praefloccellum	Euro+Med (2022)
Hieracium acidotoides aggr.	aggr.	Hieracium praepallens	Euro+Med (2022)
Hieracium acidotoides aggr.	aggr.	Hieracium prasinamaurum	Euro+Med (2022)
Hieracium acidotoides aggr.	aggr.	Hieracium sarcophylloton	Euro+Med (2022)
Hieracium acidotoides aggr.	aggr.	Hieracium senex	Euro+Med (2022)
Hieracium acidotoides aggr.	aggr.	Hieracium stenopholidium	Euro+Med (2022)
Hieracium acidotoides aggr.	aggr.	Hieracium thaectolepium	Euro+Med (2022)
Hieracium acidotoides aggr.	aggr.	Hieracium trichotum	Euro+Med (2022)
Hieracium anglicum aggr.	aggr.	Hieracium ampliatiforme	Euro+Med (2022)
Hieracium anglicum aggr.	aggr.	Hieracium ampliatum	Euro+Med (2022)
Hieracium anglicum aggr.	aggr.	Hieracium anglicum	Euro+Med (2022)
Hieracium anglicum aggr.	aggr.	Hieracium arctocerinthe	Euro+Med (2022)
Hieracium anglicum aggr.	aggr.	Hieracium cerinthiforme	Euro+Med (2022)
Hieracium anglicum aggr.	aggr.	Hieracium chasmataeum	Euro+Med (2022)
Hieracium anglicum aggr.	aggr.	Hieracium clomacotes	Euro+Med (2022)
Hieracium anglicum aggr.	aggr.	Hieracium cyclicum	Euro+Med (2022)
Hieracium anglicum aggr.	aggr.	Hieracium flocculipubens	Euro+Med (2022)
Hieracium anglicum aggr.	aggr.	Hieracium flocculosiforme	Euro+Med (2022)
Hieracium anglicum aggr.	aggr.	Hieracium flocculosum	Euro+Med (2022)
Hieracium anglicum aggr.	aggr.	Hieracium foliolosum	Euro+Med (2022)
Hieracium anglicum aggr.	aggr.	Hieracium grandiceps	Euro+Med (2022)
Hieracium anglicum aggr.	aggr.	Hieracium hartii	Euro+Med (2022)
Hieracium anglicum aggr.	aggr.	Hieracium hebridense	Euro+Med (2022)
Hieracium anglicum aggr.	aggr.	Hieracium iricum	Euro+Med (2022)
Hieracium anglicum aggr.	aggr.	Hieracium jaculifolium	Euro+Med (2022)
Hieracium anglicum aggr.	aggr.	Hieracium jonassonii	Euro+Med (2022)
Hieracium anglicum aggr.	aggr.	Hieracium langwellense	Euro+Med (2022)
Hieracium anglicum aggr.	aggr.	Hieracium leucodetum	Euro+Med (2022)
Hieracium anglicum aggr.	aggr.	Hieracium mesopolium	Euro+Med (2022)
Hieracium anglicum aggr.	aggr.	Hieracium oxybeles	Euro+Med (2022)
Hieracium anglicum aggr.	aggr.	Hieracium perintegrum	Euro+Med (2022)
Hieracium anglicum aggr.	aggr.	Hieracium scarpicum	Euro+Med (2022)
Hieracium anglicum aggr.	aggr.	Hieracium semianglicum	Euro+Med (2022)
Hieracium anglicum aggr.	aggr.	Hieracium shoolbredii	Euro+Med (2022)
Hieracium anglicum aggr.	aggr.	Hieracium stoedvarense	Euro+Med (2022)
Hieracium anglicum aggr.	aggr.	Hieracium vogarense	Euro+Med (2022)
Hieracium angustatum aggr.	aggr.	Hieracium angustatiforme	Euro+Med (2022)
Hieracium angustatum aggr.	aggr.	Hieracium angustatum	Euro+Med (2022)
Hieracium angustatum aggr.	aggr.	Hieracium cacuminum	Euro+Med (2022)
Hieracium angustatum aggr.	aggr.	Hieracium lepidotum	Euro+Med (2022)
Hieracium angustatum aggr.	aggr.	Hieracium nitens	Euro+Med (2022)
Hieracium angustatum aggr.	aggr.	Hieracium siluriense	Euro+Med (2022)
Hieracium aquiliforme aggr.	aggr.	Hieracium amphichnoum	Euro+Med (2022)
Hieracium aquiliforme aggr.	aggr.	Hieracium anomodon	Euro+Med (2022)
Hieracium aquiliforme aggr.	aggr.	Hieracium apachyglossum	Euro+Med (2022)
Hieracium aquiliforme aggr.	aggr.	Hieracium aquiliforme	Euro+Med (2022)
Hieracium aquiliforme aggr.	aggr.	Hieracium arnarfellense	Euro+Med (2022)
Hieracium aquiliforme aggr.	aggr.	Hieracium atricholepium	Euro+Med (2022)
Hieracium aquiliforme aggr.	aggr.	Hieracium belonodontum	Euro+Med (2022)
Hieracium aquiliforme aggr.	aggr.	Hieracium catoxylepis	Euro+Med (2022)
Hieracium aquiliforme aggr.	aggr.	Hieracium erigescens	Euro+Med (2022)
Hieracium aquiliforme aggr.	aggr.	Hieracium furfurosum	Euro+Med (2022)
Hieracium aquiliforme aggr.	aggr.	Hieracium integrilaterum	Euro+Med (2022)
Hieracium aquiliforme aggr.	aggr.	Hieracium leucoclonum	Euro+Med (2022)
Hieracium aquiliforme aggr.	aggr.	Hieracium levihirtum	Euro+Med (2022)
Hieracium aquiliforme aggr.	aggr.	Hieracium longifrons	Euro+Med (2022)
Hieracium aquiliforme aggr.	aggr.	Hieracium macropholidium	Euro+Med (2022)
Hieracium aquiliforme aggr.	aggr.	Hieracium oncadenium	Euro+Med (2022)
Hieracium aquiliforme aggr.	aggr.	Hieracium pammelanum	Euro+Med (2022)
Hieracium aquiliforme aggr.	aggr.	Hieracium scytalocephalum	Euro+Med (2022)
Hieracium aquiliforme aggr.	aggr.	Hieracium semiprolixum	Euro+Med (2022)
Hieracium asperulum aggr.	aggr.	Hieracium asperulum	Euro+Med (2022)
Hieracium asperulum aggr.	aggr.	Hieracium corconticum	Euro+Med (2022)
Hieracium bifidum aggr.	aggr.	Hieracium bifidum	[ad hoc, based on Tyler (pers. comm.)]
Hieracium bifidum aggr.	aggr.	Hieracium caesium	[ad hoc, based on Tyler (pers. comm.)]
Hieracium borzae aggr.	aggr.	Hieracium borzae	Euro+Med (2022)
Hieracium borzae aggr.	aggr.	Hieracium galesi	Euro+Med (2022)
Hieracium caledonicum aggr.	aggr.	Hieracium boswellii	Euro+Med (2022)
Hieracium caledonicum aggr.	aggr.	Hieracium caledonicum	Euro+Med (2022)
Hieracium caledonicum aggr.	aggr.	Hieracium dentulum	Euro+Med (2022)
Hieracium caledonicum aggr.	aggr.	Hieracium hesperium	Euro+Med (2022)
Hieracium caledonicum aggr.	aggr.	Hieracium holophyllum	Euro+Med (2022)
Hieracium caledonicum aggr.	aggr.	Hieracium leyanum	Euro+Med (2022)
Hieracium caledonicum aggr.	aggr.	Hieracium portlandicum	Euro+Med (2022)
Hieracium caledonicum aggr.	aggr.	Hieracium rubicundiforme	Euro+Med (2022)
Hieracium caledonicum aggr.	aggr.	Hieracium subrubicundum	Euro+Med (2022)
Hieracium caledonicum aggr.	aggr.	Hieracium veterascens	Euro+Med (2022)
Hieracium crocatum aggr.	aggr.	Hieracium crocatum	[ad hoc, based on Tyler (pers. comm.) & Stace (2019)]
Hieracium crocatum aggr.	aggr.	Hieracium inuloides	[ad hoc, based on Tyler (pers. comm.) & Stace (2019)]
Hieracium demissum aggr.	aggr.	Hieracium chaetolepis	Euro+Med (2022)
Hieracium demissum aggr.	aggr.	Hieracium demissum	Euro+Med (2022)
Hieracium demissum aggr.	aggr.	Hieracium notophilum	Euro+Med (2022)
Hieracium demissum aggr.	aggr.	Hieracium steffensenii	Euro+Med (2022)
Hieracium demissum aggr.	aggr.	Hieracium tynnoglochin	Euro+Med (2022)
Hieracium dovrense aggr.	aggr.	Hieracium aequilibratum	Euro+Med (2022)
Hieracium dovrense aggr.	aggr.	Hieracium dovrense	Euro+Med (2022)
Hieracium dovrense aggr.	aggr.	Hieracium gemellum	Euro+Med (2022)
Hieracium dovrense aggr.	aggr.	Hieracium obtusissimum	Euro+Med (2022)
Hieracium dovrense aggr.	aggr.	Hieracium relaxatum	Euro+Med (2022)
Hieracium dovrense aggr.	aggr.	Hieracium solum	Euro+Med (2022)
Hieracium elegantiforme aggr.	aggr.	Hieracium altipetens	Euro+Med (2022)
Hieracium elegantiforme aggr.	aggr.	Hieracium aquitectum	Euro+Med (2022)
Hieracium elegantiforme aggr.	aggr.	Hieracium atrichocephalum	Euro+Med (2022)
Hieracium elegantiforme aggr.	aggr.	Hieracium axillifrons	Euro+Med (2022)
Hieracium elegantiforme aggr.	aggr.	Hieracium devians	Euro+Med (2022)
Hieracium elegantiforme aggr.	aggr.	Hieracium elegantiforme	Euro+Med (2022)
Hieracium elegantiforme aggr.	aggr.	Hieracium erythrostictum	Euro+Med (2022)
Hieracium elegantiforme aggr.	aggr.	Hieracium gratum	Euro+Med (2022)
Hieracium elegantiforme aggr.	aggr.	Hieracium oxyodontophorum	Euro+Med (2022)
Hieracium elegantiforme aggr.	aggr.	Hieracium paurocyma	Euro+Med (2022)
Hieracium elegantiforme aggr.	aggr.	Hieracium perpiliferum	Euro+Med (2022)
Hieracium elegantiforme aggr.	aggr.	Hieracium retifolium	Euro+Med (2022)
Hieracium elegantiforme aggr.	aggr.	Hieracium rhombotum	Euro+Med (2022)
Hieracium elegantiforme aggr.	aggr.	Hieracium tapeinocephalum	Euro+Med (2022)
Hieracium fasciculare aggr.	aggr.	Hieracium coniops	Euro+Med (2022)
Hieracium fasciculare aggr.	aggr.	Hieracium dolichanthelum	Euro+Med (2022)
Hieracium fasciculare aggr.	aggr.	Hieracium fasciculare	Euro+Med (2022)
Hieracium fasciculare aggr.	aggr.	Hieracium hosjense	Euro+Med (2022)
Hieracium fasciculare aggr.	aggr.	Hieracium imandricola	Euro+Med (2022)
Hieracium fasciculare aggr.	aggr.	Hieracium incurrens	Euro+Med (2022)
Hieracium fasciculare aggr.	aggr.	Hieracium lanceatum	Euro+Med (2022)
Hieracium fasciculare aggr.	aggr.	Hieracium limitaneum	Euro+Med (2022)
Hieracium fasciculare aggr.	aggr.	Hieracium longipubens	Euro+Med (2022)
Hieracium fasciculare aggr.	aggr.	Hieracium oletatum	Euro+Med (2022)
Hieracium fasciculare aggr.	aggr.	Hieracium pseudocongruens	Euro+Med (2022)
Hieracium fasciculare aggr.	aggr.	Hieracium silenii	Euro+Med (2022)
Hieracium fasciculare aggr.	aggr.	Hieracium subglandulosipes	Euro+Med (2022)
Hieracium fasciculare aggr.	aggr.	Hieracium substrictipilum	Euro+Med (2022)
Hieracium fasciculare aggr.	aggr.	Hieracium tolvaënse	Euro+Med (2022)
Hieracium fasciculare aggr.	aggr.	Hieracium varsugae	Euro+Med (2022)
Hieracium fritzei aggr.	aggr.	Hieracium crassipedipilum	Euro+Med (2022)
Hieracium fritzei aggr.	aggr.	Hieracium fritzei	Euro+Med (2022)
Hieracium fritzei aggr.	aggr.	Hieracium kablikianum	Euro+Med (2022)
Hieracium fritzei aggr.	aggr.	Hieracium krivanense	Euro+Med (2022)
Hieracium fritzei aggr.	aggr.	Hieracium nigrostylum	Euro+Med (2022)
Hieracium fritzei aggr.	aggr.	Hieracium orthobrachion	Euro+Med (2022)
Hieracium fritzei aggr.	aggr.	Hieracium pinetophilum	Euro+Med (2022)
Hieracium fritzei aggr.	aggr.	Hieracium richianum	Euro+Med (2022)
Hieracium fritzei aggr.	aggr.	Hieracium rohlenae	Euro+Med (2022)
Hieracium fritzei aggr.	aggr.	Hieracium schneiderianum	Euro+Med (2022)
Hieracium fritzei aggr.	aggr.	Hieracium scitulum	Euro+Med (2022)
Hieracium fritzei aggr.	aggr.	Hieracium slovacum	Euro+Med (2022)
Hieracium fritzei aggr.	aggr.	Hieracium uechtritzianum	Euro+Med (2022)
Hieracium fritzei aggr.	aggr.	Hieracium wysokae	Euro+Med (2022)
Hieracium holopleurum aggr.	aggr.	Hieracium cephalochnoum	Euro+Med (2022)
Hieracium holopleurum aggr.	aggr.	Hieracium chamaecephalum	Euro+Med (2022)
Hieracium holopleurum aggr.	aggr.	Hieracium congenitum	Euro+Med (2022)
Hieracium holopleurum aggr.	aggr.	Hieracium groentvedii	Euro+Med (2022)
Hieracium holopleurum aggr.	aggr.	Hieracium hoidalicum	Euro+Med (2022)
Hieracium holopleurum aggr.	aggr.	Hieracium holopleuroides	Euro+Med (2022)
Hieracium holopleurum aggr.	aggr.	Hieracium holopleurophyllum	Euro+Med (2022)
Hieracium holopleurum aggr.	aggr.	Hieracium holopleurum	Euro+Med (2022)
Hieracium holopleurum aggr.	aggr.	Hieracium longipilipes	Euro+Med (2022)
Hieracium holopleurum aggr.	aggr.	Hieracium lopholepidioides	Euro+Med (2022)
Hieracium holopleurum aggr.	aggr.	Hieracium megalocaulon	Euro+Med (2022)
Hieracium holopleurum aggr.	aggr.	Hieracium nigrescenticeps	Euro+Med (2022)
Hieracium holopleurum aggr.	aggr.	Hieracium ovatifolians	Euro+Med (2022)
Hieracium holopleurum aggr.	aggr.	Hieracium pauradenium	Euro+Med (2022)
Hieracium holopleurum aggr.	aggr.	Hieracium scolopoglossum	Euro+Med (2022)
Hieracium holopleurum aggr.	aggr.	Hieracium senectum	Euro+Med (2022)
Hieracium holopleurum aggr.	aggr.	Hieracium sococratodium	Euro+Med (2022)
Hieracium holopleurum aggr.	aggr.	Hieracium subcongenitum	Euro+Med (2022)
Hieracium holopleurum aggr.	aggr.	Hieracium thingvellirense	Euro+Med (2022)
Hieracium hypochoeroides aggr.	aggr.	Hieracium apiculatidens	Euro+Med (2022)
Hieracium hypochoeroides aggr.	aggr.	Hieracium basalticola	Euro+Med (2022)
Hieracium hypochoeroides aggr.	aggr.	Hieracium breconense	Euro+Med (2022)
Hieracium hypochoeroides aggr.	aggr.	Hieracium britanniciforme	Euro+Med (2022)
Hieracium hypochoeroides aggr.	aggr.	Hieracium britannicoides	Euro+Med (2022)
Hieracium hypochoeroides aggr.	aggr.	Hieracium britannicum	Euro+Med (2022)
Hieracium hypochoeroides aggr.	aggr.	Hieracium cophomeles	Euro+Med (2022)
Hieracium hypochoeroides aggr.	aggr.	Hieracium dalense	Euro+Med (2022)
Hieracium hypochoeroides aggr.	aggr.	Hieracium dicella	Euro+Med (2022)
Hieracium hypochoeroides aggr.	aggr.	Hieracium ebudicum	Euro+Med (2022)
Hieracium hypochoeroides aggr.	aggr.	Hieracium eucallum	Euro+Med (2022)
Hieracium hypochoeroides aggr.	aggr.	Hieracium fratrum	Euro+Med (2022)
Hieracium hypochoeroides aggr.	aggr.	Hieracium glaucovatum	Euro+Med (2022)
Hieracium hypochoeroides aggr.	aggr.	Hieracium hypochoeroides	Euro+Med (2022)
Hieracium hypochoeroides aggr.	aggr.	Hieracium leucaeolum	Euro+Med (2022)
Hieracium hypochoeroides aggr.	aggr.	Hieracium naviense	Euro+Med (2022)
Hieracium hypochoeroides aggr.	aggr.	Hieracium repandulare	Euro+Med (2022)
Hieracium hypochoeroides aggr.	aggr.	Hieracium riddelsdellii	Euro+Med (2022)
Hieracium hypochoeroides aggr.	aggr.	Hieracium sarcophylloides	Euro+Med (2022)
Hieracium hypochoeroides aggr.	aggr.	Hieracium saxorum	Euro+Med (2022)
Hieracium hypochoeroides aggr.	aggr.	Hieracium stictum	Euro+Med (2022)
Hieracium hypochoeroides aggr.	aggr.	Hieracium subbritannicum	Euro+Med (2022)
Hieracium hypochoeroides aggr.	aggr.	Hieracium subplanifolium	Euro+Med (2022)
Hieracium hypochoeroides aggr.	aggr.	Hieracium vagicola	Euro+Med (2022)
Hieracium lachenalii aggr.	aggr.	Hieracium diaphanoides	[ad hoc, based on Tyler (pers. comm.)]
Hieracium lachenalii aggr.	aggr.	Hieracium lachenalii	[ad hoc, based on Tyler (pers. comm.)]
Hieracium lomnicense aggr.	aggr.	Hieracium czeremoszense	Euro+Med (2022)
Hieracium lomnicense aggr.	aggr.	Hieracium lomnicense	Euro+Med (2022)
Hieracium lygistodon aggr.	aggr.	Hieracium acroscepes	Euro+Med (2022)
Hieracium lygistodon aggr.	aggr.	Hieracium angusticranum	Euro+Med (2022)
Hieracium lygistodon aggr.	aggr.	Hieracium aphyllocaule	Euro+Med (2022)
Hieracium lygistodon aggr.	aggr.	Hieracium apicicomum	Euro+Med (2022)
Hieracium lygistodon aggr.	aggr.	Hieracium austurgilense	Euro+Med (2022)
Hieracium lygistodon aggr.	aggr.	Hieracium cataponum	Euro+Med (2022)
Hieracium lygistodon aggr.	aggr.	Hieracium chordum	Euro+Med (2022)
Hieracium lygistodon aggr.	aggr.	Hieracium chrysocladium	Euro+Med (2022)
Hieracium lygistodon aggr.	aggr.	Hieracium cremnaeiforme	Euro+Med (2022)
Hieracium lygistodon aggr.	aggr.	Hieracium davidsonii	Euro+Med (2022)
Hieracium lygistodon aggr.	aggr.	Hieracium diacritum	Euro+Med (2022)
Hieracium lygistodon aggr.	aggr.	Hieracium edentulum	Euro+Med (2022)
Hieracium lygistodon aggr.	aggr.	Hieracium einarssonii	Euro+Med (2022)
Hieracium lygistodon aggr.	aggr.	Hieracium extracticaule	Euro+Med (2022)
Hieracium lygistodon aggr.	aggr.	Hieracium fusciviride	Euro+Med (2022)
Hieracium lygistodon aggr.	aggr.	Hieracium gigantocephalum	Euro+Med (2022)
Hieracium lygistodon aggr.	aggr.	Hieracium hafstroendense	Euro+Med (2022)
Hieracium lygistodon aggr.	aggr.	Hieracium haploum	Euro+Med (2022)
Hieracium lygistodon aggr.	aggr.	Hieracium holostenophyllum	Euro+Med (2022)
Hieracium lygistodon aggr.	aggr.	Hieracium integrifrons	Euro+Med (2022)
Hieracium lygistodon aggr.	aggr.	Hieracium leucomalloides	Euro+Med (2022)
Hieracium lygistodon aggr.	aggr.	Hieracium leucomallum	Euro+Med (2022)
Hieracium lygistodon aggr.	aggr.	Hieracium lygistodon	Euro+Med (2022)
Hieracium lygistodon aggr.	aggr.	Hieracium macrolasium	Euro+Med (2022)
Hieracium lygistodon aggr.	aggr.	Hieracium monanthum	Euro+Med (2022)
Hieracium lygistodon aggr.	aggr.	Hieracium nanidens	Euro+Med (2022)
Hieracium lygistodon aggr.	aggr.	Hieracium neorepandum	Euro+Med (2022)
Hieracium lygistodon aggr.	aggr.	Hieracium nepium	Euro+Med (2022)
Hieracium lygistodon aggr.	aggr.	Hieracium obtusangulum	Euro+Med (2022)
Hieracium lygistodon aggr.	aggr.	Hieracium percome	Euro+Med (2022)
Hieracium lygistodon aggr.	aggr.	Hieracium percomiforme	Euro+Med (2022)
Hieracium lygistodon aggr.	aggr.	Hieracium petiolosum	Euro+Med (2022)
Hieracium lygistodon aggr.	aggr.	Hieracium piciniforme	Euro+Med (2022)
Hieracium lygistodon aggr.	aggr.	Hieracium praegrandiceps	Euro+Med (2022)
Hieracium lygistodon aggr.	aggr.	Hieracium pumilare	Euro+Med (2022)
Hieracium lygistodon aggr.	aggr.	Hieracium pyrolifolium	Euro+Med (2022)
Hieracium lygistodon aggr.	aggr.	Hieracium repandilaterum	Euro+Med (2022)
Hieracium lygistodon aggr.	aggr.	Hieracium rubrimaculatum	Euro+Med (2022)
Hieracium lygistodon aggr.	aggr.	Hieracium semipercome	Euro+Med (2022)
Hieracium lygistodon aggr.	aggr.	Hieracium skarddalicum	Euro+Med (2022)
Hieracium lygistodon aggr.	aggr.	Hieracium steindorii	Euro+Med (2022)
Hieracium lygistodon aggr.	aggr.	Hieracium stellatifolium	Euro+Med (2022)
Hieracium lygistodon aggr.	aggr.	Hieracium stroemfeltii	Euro+Med (2022)
Hieracium lygistodon aggr.	aggr.	Hieracium subapicicomum	Euro+Med (2022)
Hieracium lygistodon aggr.	aggr.	Hieracium subfusciviride	Euro+Med (2022)
Hieracium lygistodon aggr.	aggr.	Hieracium subrotundiforme	Euro+Med (2022)
Hieracium lygistodon aggr.	aggr.	Hieracium subrotundum	Euro+Med (2022)
Hieracium magnidens aggr.	aggr.	Hieracium anochnoum	Euro+Med (2022)
Hieracium magnidens aggr.	aggr.	Hieracium bipediforme	Euro+Med (2022)
Hieracium magnidens aggr.	aggr.	Hieracium dissotocoides	Euro+Med (2022)
Hieracium magnidens aggr.	aggr.	Hieracium hraunense	Euro+Med (2022)
Hieracium magnidens aggr.	aggr.	Hieracium hyocomium	Euro+Med (2022)
Hieracium magnidens aggr.	aggr.	Hieracium magnidens	Euro+Med (2022)
Hieracium magnidens aggr.	aggr.	Hieracium nordlandicum	Euro+Med (2022)
Hieracium magnidens aggr.	aggr.	Hieracium phrixomalliforme	Euro+Med (2022)
Hieracium magnidens aggr.	aggr.	Hieracium semibipes	Euro+Med (2022)
Hieracium magnidens aggr.	aggr.	Hieracium skutudalicum	Euro+Med (2022)
Hieracium magnidens aggr.	aggr.	Hieracium stefanssonii	Euro+Med (2022)
Hieracium magnidens aggr.	aggr.	Hieracium tanyclonum	Euro+Med (2022)
Hieracium microdon aggr.	aggr.	Hieracium crinosum	Euro+Med (2022)
Hieracium microdon aggr.	aggr.	Hieracium gilense	Euro+Med (2022)
Hieracium microdon aggr.	aggr.	Hieracium ingolfii	Euro+Med (2022)
Hieracium microdon aggr.	aggr.	Hieracium microdon	Euro+Med (2022)
Hieracium microdon aggr.	aggr.	Hieracium semisuperbum	Euro+Med (2022)
Hieracium murorum aggr.	aggr.	Hieracium glaucinum	[ad hoc, based on Tyler (pers. comm.)]
Hieracium murorum aggr.	aggr.	Hieracium murorum	[ad hoc, based on Tyler (pers. comm.)]
Hieracium murorum aggr. s.l.	aggr. s.l.	Hieracium bifidum aggr.	Landolt et al. (2010)	Excl. H. lachenalii
Hieracium murorum aggr. s.l.	aggr. s.l.	Hieracium murorum aggr.	Landolt et al. (2010)	Excl. H. lachenalii
Hieracium murorum aggr. s.l.	aggr. s.l.	Hieracium pictum	Landolt et al. (2010)	Excl. H. lachenalii
Hieracium murorum aggr. s.l.	aggr. s.l.	Hieracium schmidtii aggr.	Landolt et al. (2010)	Excl. H. lachenalii
Hieracium murorum aggr. s.l.	aggr. s.l.	Hieracium tenuiflorum	Landolt et al. (2010)	Excl. H. lachenalii
Hieracium murorum aggr. s.l.	aggr. s.l.	Hieracium transylvanicum	Landolt et al. (2010)	Excl. H. lachenalii
Hieracium plicatum aggr.	aggr.	Hieracium basilare	Euro+Med (2022)
Hieracium plicatum aggr.	aggr.	Hieracium constringens	Euro+Med (2022)
Hieracium plicatum aggr.	aggr.	Hieracium elegans	Euro+Med (2022)
Hieracium plicatum aggr.	aggr.	Hieracium plicatum	Euro+Med (2022)
Hieracium plicatum aggr.	aggr.	Hieracium prolatatum	Euro+Med (2022)
Hieracium plicatum aggr.	aggr.	Hieracium prolatescens	Euro+Med (2022)
Hieracium porrifolium aggr.	aggr.	Hieracium bupleuroides	Landolt et al. (2010)
Hieracium porrifolium aggr.	aggr.	Hieracium glaucum	Landolt et al. (2010)
Hieracium porrifolium aggr.	aggr.	Hieracium porrifolium	Landolt et al. (2010)
Hieracium porrifolium aggr.	aggr.	Hieracium sparsum	Landolt et al. (2010)
Hieracium prenanthoides aggr.	aggr.	Hieracium juranum	[ad hoc, based on Tyler (pers. comm.) & Stace (2019)]
Hieracium prenanthoides aggr.	aggr.	Hieracium prenanthoides	[ad hoc, based on Tyler (pers. comm.) & Stace (2019)]
Hieracium pullicalicitum aggr.	aggr.	Hieracium agastophyes	Euro+Med (2022)
Hieracium pullicalicitum aggr.	aggr.	Hieracium cladiopogon	Euro+Med (2022)
Hieracium pullicalicitum aggr.	aggr.	Hieracium lamprochlorum	Euro+Med (2022)
Hieracium pullicalicitum aggr.	aggr.	Hieracium megaphyes	Euro+Med (2022)
Hieracium pullicalicitum aggr.	aggr.	Hieracium olafii	Euro+Med (2022)
Hieracium pullicalicitum aggr.	aggr.	Hieracium pullicalicitum	Euro+Med (2022)
Hieracium schmidtii aggr.	aggr.	Hieracium norvegicum	[ad hoc, based on Tyler (pers. comm.)]
Hieracium schmidtii aggr.	aggr.	Hieracium onosmoides	[ad hoc, based on Tyler (pers. comm.)]
Hieracium schmidtii aggr.	aggr.	Hieracium saxifragum	[ad hoc, based on Tyler (pers. comm.)]
Hieracium schmidtii aggr.	aggr.	Hieracium schmidtii	[ad hoc, based on Tyler (pers. comm.)]
Hieracium scoticum aggr.	aggr.	Hieracium aggregatifoliium	Euro+Med (2022)
Hieracium scoticum aggr.	aggr.	Hieracium angustisquamum	Euro+Med (2022)
Hieracium scoticum aggr.	aggr.	Hieracium apheles	Euro+Med (2022)
Hieracium scoticum aggr.	aggr.	Hieracium breconicola	Euro+Med (2022)
Hieracium scoticum aggr.	aggr.	Hieracium farrense	Euro+Med (2022)
Hieracium scoticum aggr.	aggr.	Hieracium pseudozetlandicum	Euro+Med (2022)
Hieracium scoticum aggr.	aggr.	Hieracium pusillifolium	Euro+Med (2022)
Hieracium scoticum aggr.	aggr.	Hieracium scoticum	Euro+Med (2022)
Hieracium scoticum aggr.	aggr.	Hieracium scottii	Euro+Med (2022)
Hieracium scoticum aggr.	aggr.	Hieracium sowadeense	Euro+Med (2022)
Hieracium scoticum aggr.	aggr.	Hieracium subscoticum	Euro+Med (2022)
Hieracium semidovrense aggr.	aggr.	Hieracium amaurostictum	Euro+Med (2022)
Hieracium semidovrense aggr.	aggr.	Hieracium difficile	Euro+Med (2022)
Hieracium semidovrense aggr.	aggr.	Hieracium lividorubens	Euro+Med (2022)
Hieracium semidovrense aggr.	aggr.	Hieracium microstictum	Euro+Med (2022)
Hieracium semidovrense aggr.	aggr.	Hieracium semidovrense	Euro+Med (2022)
Hieracium smolandicum aggr.	aggr.	Hieracium pholidotum	Euro+Med (2022)
Hieracium smolandicum aggr.	aggr.	Hieracium smolandicum	Euro+Med (2022)
Hieracium sparsifolium aggr.	aggr.	Hieracium acidophorum	Euro+Med (2022)
Hieracium sparsifolium aggr.	aggr.	Hieracium acidophyllum	Euro+Med (2022)
Hieracium sparsifolium aggr.	aggr.	Hieracium anelctum	Euro+Med (2022)
Hieracium sparsifolium aggr.	aggr.	Hieracium chamaeodon	Euro+Med (2022)
Hieracium sparsifolium aggr.	aggr.	Hieracium faeroense	Euro+Med (2022)
Hieracium sparsifolium aggr.	aggr.	Hieracium floccilepium	Euro+Med (2022)
Hieracium sparsifolium aggr.	aggr.	Hieracium halfdanii	Euro+Med (2022)
Hieracium sparsifolium aggr.	aggr.	Hieracium hypoleptolepis	Euro+Med (2022)
Hieracium sparsifolium aggr.	aggr.	Hieracium macrocomum	Euro+Med (2022)
Hieracium sparsifolium aggr.	aggr.	Hieracium megalophyton	Euro+Med (2022)
Hieracium sparsifolium aggr.	aggr.	Hieracium myrdalense	Euro+Med (2022)
Hieracium sparsifolium aggr.	aggr.	Hieracium oxypleurum	Euro+Med (2022)
Hieracium sparsifolium aggr.	aggr.	Hieracium pernervosum	Euro+Med (2022)
Hieracium sparsifolium aggr.	aggr.	Hieracium phrixoclonum	Euro+Med (2022)
Hieracium sparsifolium aggr.	aggr.	Hieracium praethulense	Euro+Med (2022)
Hieracium sparsifolium aggr.	aggr.	Hieracium purpuriguttatum	Euro+Med (2022)
Hieracium sparsifolium aggr.	aggr.	Hieracium sparsifolium	Euro+Med (2022)
Hieracium sparsifolium aggr.	aggr.	Hieracium stictophylloides	Euro+Med (2022)
Hieracium sparsifolium aggr.	aggr.	Hieracium stictophyllum	Euro+Med (2022)
Hieracium sparsifolium aggr.	aggr.	Hieracium thermophilum	Euro+Med (2022)
Hieracium sparsifolium aggr.	aggr.	Hieracium tynnotrichum	Euro+Med (2022)
Hieracium sparsifolium aggr.	aggr.	Hieracium vikense	Euro+Med (2022)
Hieracium sudeticum aggr.	aggr.	Hieracium pedunculare	Euro+Med (2022)
Hieracium sudeticum aggr.	aggr.	Hieracium sudeticum	Euro+Med (2022)
Hieracium triangulare aggr.	aggr.	Hieracium panaeolum	Euro+Med (2022)
Hieracium triangulare aggr.	aggr.	Hieracium triangulare	Euro+Med (2022)
Hieracium truncatum aggr.	aggr.	Hieracium attenuatifolium	Euro+Med (2022)
Hieracium truncatum aggr.	aggr.	Hieracium australius	Euro+Med (2022)
Hieracium truncatum aggr.	aggr.	Hieracium chrysostylum	Euro+Med (2022)
Hieracium truncatum aggr.	aggr.	Hieracium depilatum	Euro+Med (2022)
Hieracium truncatum aggr.	aggr.	Hieracium dilectum	Euro+Med (2022)
Hieracium truncatum aggr.	aggr.	Hieracium hethlandiae	Euro+Med (2022)
Hieracium truncatum aggr.	aggr.	Hieracium humidorum	Euro+Med (2022)
Hieracium truncatum aggr.	aggr.	Hieracium klingrahoolense	Euro+Med (2022)
Hieracium truncatum aggr.	aggr.	Hieracium northroënse	Euro+Med (2022)
Hieracium truncatum aggr.	aggr.	Hieracium protractum	Euro+Med (2022)
Hieracium truncatum aggr.	aggr.	Hieracium pugsleyi	Euro+Med (2022)
Hieracium truncatum aggr.	aggr.	Hieracium rutiliceps	Euro+Med (2022)
Hieracium truncatum aggr.	aggr.	Hieracium spenceanum	Euro+Med (2022)
Hieracium truncatum aggr.	aggr.	Hieracium splendens	Euro+Med (2022)
Hieracium truncatum aggr.	aggr.	Hieracium subtruncatum	Euro+Med (2022)
Hieracium truncatum aggr.	aggr.	Hieracium truncatum	Euro+Med (2022)
Hieracium truncatum aggr.	aggr.	Hieracium vinicaule	Euro+Med (2022)
Hieracium umbellatum aggr.	aggr.	Hieracium laevigatum	Landolt et al. (2010)
Hieracium umbellatum aggr.	aggr.	Hieracium racemosum	Landolt et al. (2010)
Hieracium umbellatum aggr.	aggr.	Hieracium sabaudum	Landolt et al. (2010)
Hieracium umbellatum aggr.	aggr.	Hieracium umbellatum	Landolt et al. (2010)
Hieracium villosum aggr.	aggr.	Hieracium pilosum	Juillerat et al. (2017)
Hieracium villosum aggr.	aggr.	Hieracium villosum	Juillerat et al. (2017)
Hierochloe odorata aggr.	aggr.	Hierochloe hirta	Landolt et al. (2010)
Hierochloe odorata aggr.	aggr.	Hierochloe odorata	Landolt et al. (2010)
Himantoglossum hircinum aggr.	aggr.	Himantoglossum adriaticum	Landolt et al. (2010)
Himantoglossum hircinum aggr.	aggr.	Himantoglossum hircinum	Landolt et al. (2010)
Holcus lanatus aggr.	aggr.	Holcus lanatus	Landolt et al. (2010)
Holcus lanatus aggr.	aggr.	Holcus mollis	Landolt et al. (2010)
Holcus lanatus aggr.	aggr.	Holcus notarisii	Landolt et al. (2010)
Hordeum marinum aggr.	aggr.	Hordeum geniculatum	Ehrendorfer (1973)
Hordeum marinum aggr.	aggr.	Hordeum marinum	Ehrendorfer (1973)
Hornungia procumbens aggr.	aggr.	Hymenolobus pauciflorus	Ehrendorfer (1973)	Genus changed
Hornungia procumbens aggr.	aggr.	Hymenolobus procumbens	Ehrendorfer (1973)	Genus changed
Hyacinthoides non-scripta aggr.	aggr.	Hyacinthoides hispanica	Landolt et al. (2010)
Hyacinthoides non-scripta aggr.	aggr.	Hyacinthoides non-scripta	Landolt et al. (2010)
Hylotelephium telephium aggr.	aggr.	Hylotelephium maximum	Ehrendorfer (1973)	Genus changed
Hylotelephium telephium aggr.	aggr.	Hylotelephium telephium	Ehrendorfer (1973)	Genus changed
Hylotelephium telephium aggr.	aggr.	Hylotelephium vulgare	Ehrendorfer (1973)	Genus changed
Hypericum maculatum aggr.	aggr.	Hypericum dubium	Ehrendorfer (1973)
Hypericum maculatum aggr.	aggr.	Hypericum maculatum	Ehrendorfer (1973)
Hypericum maculatum aggr.	aggr.	Hypericum x desetangsii	Ehrendorfer (1973)
Hypericum perforatum aggr. s.l.	aggr. s.l.	Hypericum maculatum aggr.	Landolt et al. (2010)
Hypericum perforatum aggr. s.l.	aggr. s.l.	Hypericum perforatum	Landolt et al. (2010)
Hypericum perforatum aggr. s.l.	aggr. s.l.	Hypericum tetrapterum	Landolt et al. (2010)
Hypochaeris uniflora	aggr.	Hypochaeris facchiniana	Ehrendorfer (1973)
Hypochaeris uniflora	aggr.	Hypochaeris uniflora	Ehrendorfer (1973)
Hypopitys monotropa aggr.	aggr.	Hypopitys hypophegea	Landolt et al. (2010)
Hypopitys monotropa aggr.	aggr.	Hypopitys monotropa	Landolt et al. (2010)
Iberis amara aggr.	aggr.	Iberis amara	Landolt et al. (2010)
Iberis amara aggr.	aggr.	Iberis intermedia	Landolt et al. (2010)
Iberis umbellata aggr.	aggr.	Iberis ciliata	Landolt et al. (2010)
Iberis umbellata aggr.	aggr.	Iberis linifolia	Landolt et al. (2010)
Iberis umbellata aggr.	aggr.	Iberis umbellata	Landolt et al. (2010)
Indigofera sect. Amecarpus	sect.	Indigofera arabica	Euro+Med (2022)
Indigofera sect. Amecarpus	sect.	Indigofera sessiliflora	Euro+Med (2022)
Indigofera sect. Indigofera	sect.	Indigofera articulata	Euro+Med (2022)
Indigofera sect. Indigofera	sect.	Indigofera coerulea	Euro+Med (2022)
Indigofera sect. Indigofera	sect.	Indigofera tinctoria	Euro+Med (2022)
Inula candida aggr.	aggr.	Inula candida	Euro+Med (2022)
Inula candida aggr.	aggr.	Inula oxylepis	Euro+Med (2022)
Inula candida aggr.	aggr.	Inula pseudolimonella	Euro+Med (2022)
Inula candida aggr.	aggr.	Inula rotundifolia	Euro+Med (2022)
Inula salicina aggr.	aggr.	Inula helvetica	Landolt et al. (2010)
Inula salicina aggr.	aggr.	Inula salicina	Landolt et al. (2010)
Inula verbascifolia aggr.	aggr.	Inula aschersoniana	Euro+Med (2022)
Inula verbascifolia aggr.	aggr.	Inula fragilis	Euro+Med (2022)
Inula verbascifolia aggr.	aggr.	Inula heterolepis	Euro+Med (2022)
Inula verbascifolia aggr.	aggr.	Inula methanaea	Euro+Med (2022)
Inula verbascifolia aggr.	aggr.	Inula parnassica	Euro+Med (2022)
Inula verbascifolia aggr.	aggr.	Inula verbascifolia	Euro+Med (2022)
Iris germanica aggr.	aggr.	Iris aphylla	Landolt et al. (2010)
Iris germanica aggr.	aggr.	Iris japonica	Landolt et al. (2010)
Iris germanica aggr.	aggr.	Iris lutescens	Landolt et al. (2010)
Iris germanica aggr.	aggr.	Iris pallida	Landolt et al. (2010)
Iris germanica aggr.	aggr.	Iris variegata	Landolt et al. (2010)
Iris germanica aggr.	aggr.	Iris x germanica	Landolt et al. (2010)
Isatis tinctoria aggr.	aggr.	Isatis praecox	Landolt et al. (2010)
Isatis tinctoria aggr.	aggr.	Isatis tinctoria	Landolt et al. (2010)
Jacobaea alpina aggr.	aggr.	Jacobaea alpina	Landolt et al. (2010)
Jacobaea alpina aggr.	aggr.	Jacobaea subalpina	Landolt et al. (2010)
Jacobaea carniolica aggr.	aggr.	Jacobaea carniolica	Euro+Med (2022)
Jacobaea carniolica aggr.	aggr.	Jacobaea disjuncta	Euro+Med (2022)
Jacobaea carniolica aggr.	aggr.	Jacobaea insubrica	Euro+Med (2022)
Jacobaea carniolica aggr.	aggr.	Jacobaea norica	Euro+Med (2022)
Jacobaea erucifolia aggr.	aggr.	Jacobaea aquatica	Euro+Med (2022)
Jacobaea erucifolia aggr.	aggr.	Jacobaea argunensis	Euro+Med (2022)
Jacobaea erucifolia aggr.	aggr.	Jacobaea erratica	Euro+Med (2022)
Jacobaea erucifolia aggr.	aggr.	Jacobaea erucifolia	Euro+Med (2022)
Jacobaea erucifolia aggr.	aggr.	Jacobaea lycopifolia	Euro+Med (2022)
Jacobaea erucifolia aggr.	aggr.	Jacobaea ornata	Euro+Med (2022)
Jacobaea erucifolia aggr.	aggr.	Jacobaea vulgaris	Euro+Med (2022)
Jacobaea incana aggr. s.l.	aggr. s.l.	Jacobaea carniolica aggr.	Landolt et al. (2010)
Jacobaea incana aggr. s.l.	aggr. s.l.	Jacobaea incana	Landolt et al. (2010)
Jacobaea incana aggr. s.l.	aggr. s.l.	Jacobaea persoonii	Landolt et al. (2010)
Jacobaea maritima aggr.	aggr.	Jacobaea candida	Euro+Med (2022)
Jacobaea maritima aggr.	aggr.	Jacobaea gibbosa	Euro+Med (2022)
Jacobaea maritima aggr.	aggr.	Jacobaea maritima	Euro+Med (2022)
Juncus articulatus aggr.	aggr.	Juncus alpinoarticulatus	Juillerat et al. (2017)
Juncus articulatus aggr.	aggr.	Juncus articulatus	Juillerat et al. (2017)
Juncus articulatus aggr. s.l.	aggr. s.l.	Juncus acutiflorus	Landolt et al. (2010)
Juncus articulatus aggr. s.l.	aggr. s.l.	Juncus anceps	Landolt et al. (2010)
Juncus articulatus aggr. s.l.	aggr. s.l.	Juncus articulatus aggr.	Landolt et al. (2010)
Juncus articulatus aggr. s.l.	aggr. s.l.	Juncus striatus	Landolt et al. (2010)
Juncus bufonius aggr.	aggr.	Juncus bufonius	Landolt et al. (2010)
Juncus bufonius aggr.	aggr.	Juncus hybridus	Landolt et al. (2010)
Juncus bufonius aggr.	aggr.	Juncus minutulus	Landolt et al. (2010)
Juncus compressus aggr.	aggr.	Juncus compressus	Ehrendorfer (1973)
Juncus compressus aggr.	aggr.	Juncus gerardi	Ehrendorfer (1973)
Juncus effusus aggr.	aggr.	Juncus conglomeratus	Landolt et al. (2010)
Juncus effusus aggr.	aggr.	Juncus effusus	Landolt et al. (2010)
Juncus tenageia aggr.	aggr.	Juncus sphaerocarpus	Landolt et al. (2010)
Juncus tenageia aggr.	aggr.	Juncus tenageia	Landolt et al. (2010)
Juncus trifidus aggr.	aggr.	Juncus monanthos	Ehrendorfer (1973)
Juncus trifidus aggr.	aggr.	Juncus trifidus	Ehrendorfer (1973)
Knautia arvensis aggr.	aggr.	Knautia arvensis	Ehrendorfer (1973)
Knautia arvensis aggr.	aggr.	Knautia illyrica	Ehrendorfer (1973)
Knautia arvensis aggr.	aggr.	Knautia kitaibelii	Ehrendorfer (1973)
Knautia arvensis aggr.	aggr.	Knautia purpurea	Ehrendorfer (1973)
Knautia arvensis aggr. s.l.	aggr.	Knautia arvensis aggr.	Landolt et al. (2010)
Knautia arvensis aggr. s.l.	aggr.	Knautia carinthiaca	Landolt et al. (2010)
Knautia arvensis aggr. s.l.	aggr.	Knautia fleischmannii	Landolt et al. (2010)
Knautia arvensis aggr. s.l.	aggr.	Knautia leucophaea	Landolt et al. (2010)
Knautia arvensis aggr. s.l.	aggr.	Knautia mollis	Landolt et al. (2010)
Knautia arvensis aggr. s.l.	aggr.	Knautia norica	Landolt et al. (2010)
Knautia arvensis aggr. s.l.	aggr.	Knautia subcanescens	Landolt et al. (2010)
Knautia arvensis aggr. s.l.	aggr.	Knautia velutina aggr.	Landolt et al. (2010)
Knautia dipsacifolia aggr.	aggr.	Knautia dipsacifolia	Landolt et al. (2010)	Excl. K. baldensis (other aggr.)
Knautia dipsacifolia aggr.	aggr.	Knautia ressmannii	Landolt et al. (2010)	Excl. K. baldensis (other aggr.)
Knautia longifolia aggr.	aggr.	Knautia godetii	Landolt et al. (2010)
[truncated: 3,559 more rows]

## Sheet: Table S3.4 Additional synonyms
Name.source.harmonized	Rank.source	Taxon.accepted	Rank.accepted	Source for assignment
Abies alba subsp. alba x nordmanniana	nothosubsp. (formula)	Abies alba x nordmanniana	hyb.-sp. (formula)
Acanthopanax sessiliflorus	sp.	Eleutherococcus sessiliflorus	sp.
Acer campestre subsp. campestre	subsp.	Acer campestre	sp.	Autonym
Acer cappadocicum subsp. cappadocicum	subsp.	Acer cappadocicum	sp.	Autonym
Acer mono	sp.	Acer pictum subsp. mono	subsp.
Acer negundo subsp. negundo	subsp.	Acer negundo	sp.	Autonym
Acer opalus subsp. opalus	subsp.	Acer opalus	sp.	Autonym
Acer platanoides subsp. platanoides	subsp.	Acer platanoides	sp.	Autonym
Achillea ambigua	sp.	Achillea erba-rotta	sp.
Achillea erba-rotta aggr.	aggr.	Achillea erba-rotta	sp.
Achillea ptarmica subsp. ptarmica	subsp.	Achillea ptarmica	sp.	Autonym
Achillea raxensis	sp.	Achillea millefolium subsp. millefolium	subsp.
Achillea schurii subsp. schurii	subsp.	Achillea oxyloba subsp. schurii	subsp.
Achnatherum pseudobromoides	sp.	Achnatherum fallacinum	sp.
Acinos arvensis subsp. arvensis	subsp.	Clinopodium acinos	sp.	Autonym
Aconitum anthora subsp. anthora	subsp.	Aconitum anthora	sp.	Autonym
Aconitum confertiflorum var. pumilum		Aconitum anthora
Aconitum degenii aggr.	aggr.	Aconitum variegatum aggr.	aggr.
Aconitum degenii subsp. paniculatum var. laxifloru	var.	Aconitum degenii	sp.
Aconitum degenii subsp. paniculatum var. turrachen	var.	Aconitum degenii	sp.
Aconitum lycoctonum aggr.	aggr.	Aconitum lycoctonum	sp.
Aconitum paniculatum		Aconitum degenii
Aconitum paniculatum	Species	Aconitum degenii
Aconitum paniculatum	Species	Aconitum degenii
Aconitum paniculatum	sp.	Aconitum degenii	sp.
Aconitum romanicum		Aconitum napellus subsp. fissurae
Aconitum tauricum subsp. tauricum	subsp.	Aconitum tauricum	sp.	Autonym
Aconitum variegatum subsp. variegatum var. variegatum	subsp.	Aconitum variegatum subsp. variegatum	subsp.	Autonym
Aconitum vulparia subsp. vulparia	subsp.	Aconitum lycotonum subsp. vulparia	subsp.
Aconitum x cammarum	hyb.-sp.	Aconitum x schneebergense	hyb.-sp.	Müller et al. (2021)
Aconitum x stoerkianum	hyb.-sp.	Aconitum x schneebergense	hyb.-sp.	Müller et al. (2021)
Adenocarpus lainzii		Adenocarpus complicatus subsp. lainzii
Adonis annua aggr.	aggr.	Adonis annua	sp.
Adonis microcarpa aggr.	aggr.	Adonis aestivalis aggr.	aggr.
Adonis microcarpa subsp. microcarpa	subsp.	Adonis microcarpa	sp.	Autonym
Aegilops ovata	Species	Aegilops geniculata
Aegilops ovata		Aegilops neglecta
Aegilops ovata		Aegilops neglecta
Aegilops ovata aggr.	aggr.	Aegilops geniculata aggr.	aggr.
Aetheorhiza bulbosa subsp. bulbosa	subsp.	Sonchus bulbosus subsp. bulbosus	subsp.
Aethionema saxatile aggr.	aggr.	Aethionema saxatile	sp.
Aethusa cynapium aggr.	aggr.	Aethusa cynapium	sp.
Agrostis canina var. opulentus	var.	Agrostis canina subsp. canina	subsp.
Agrostis capillaris aggr.	aggr.	Agrostis capillaris aggr. s.l.	aggr. s.l.
Agrostis castellana var. castellana	var.	Agrostis castellana	sp.	Autonym
Agrostis castellana var. mutica	var.	Agrostis castellana	sp.	WFO (2022)
Agrostis rupestris var. alpinoides	var.	Agrostis rupestris subsp. rupestris	subsp.	WFO (2022)
Agrostis stolonifera var. marina	var.	Agrostis stolonifera	sp.	WFO (2022) & POWO (2022)
Agrostis stolonifera var. palustris	var.	Agrostis stolonifera	sp.	WFO (2022) & POWO (2022)
Agrostis stolonifera var. pseudopungens	var.	Agrostis stolonifera subsp. gaditana	subsp.
Ajuga iva var. iva	var.	Ajuga iva	sp.	Autonym
Ajuga salicifolia subsp. salicifolia	subsp.	Ajuga salicifolia	sp.	Autonym
Alchemilla acutiloba var. micans	Variety	Alchemilla micans	sp.
Alchemilla alpina + basaltica	list	Alchemilla alpina aggr.	aggr.
Alchemilla cuspidens		Alchemilla sericoneura
Alchemilla filicaulis subsp. filicaulis	subsp.	Alchemilla filicaulis	sp.	Autonym
Alchemilla filicaulis subsp. filicaulis	subsp.	Alchemilla filicaulis	sp.
Alchemilla vulgaris aggr.	aggr.	Alchemilla vulgaris aggr. s.l.	aggr. s.l.
Alisma michaletii	Species	Alisma plantago-aquatica
Allium commutatum x porrum	hyb.-sp. (formula)	Allium ampeloprasum x commutatum	hyb.-sp. (formula)
Allium ochroleucum subsp. ochroleucum	subsp.	Allium ericetorum	sp.
Allium paradoxum var. paradoxum	var.	Allium paradoxum	sp.	Autonym
Allium rotundum subsp. rotundum	subsp.	Allium rotundum	sp.	Autonym
Allium saxatile subsp. tergestinum	subsp.	Allium saxatile	sp.
Allium scorodoprasum subsp. scorodoprasum	subsp.	Allium scorodoprasum	sp.	Autonym
Allium ursinum subsp. ursinum	subsp.	Allium ursinum	sp.	Autonym
Alnus alnobetula subsp. alnobetula	subsp.	Alnus viridis subsp. viridis	subsp.
Alnus alnobetula x incana subsp. incana	nothosubsp. (formula)	Alnus incana subsp. incana x viridis	nothosubsp. (formula)
Alnus cordata subsp. cordata	subsp.	Alnus cordata	sp.	Autonym
Alopecurus tuscheticus		Alopecurus glacialis subsp. tuscheticus (Trautv.) Tzvelev
Althaea officinalis subsp. officinalis		Althaea officinalis
Alyssum alpestre aggr.	aggr.	Odontarrhena alpestris aggr.	aggr.
Alyssum argenteum aggr.	aggr.	Odontarrhena argentea aggr.	aggr.
Alyssum subalpinum	sp.	Odontarrhena subalpina	sp.
Alyssum tortuosum subsp. tortuosum		Odontarrhena tortuosa
Amaranthus blitum subsp. blitum		Amaranthus blitum
Amaranthus blitum subsp. emarginatus var. emarginatus		Amaranthus emarginatus
Amaranthus blitum subsp. emarginatus var. pseudogracilis		Amaranthus emarginatus
Amaranthus hybridus subsp. hybridus		Amaranthus hybridus
Amaranthus hybridus subsp. hybridus var. erythrostachys		Amaranthus hybridus
Amaranthus hybridus subsp. hybridus var. hybridus		Amaranthus hybridus
Amaranthus retroflexus aggr.	aggr.	Amaranthus retroflexus aggr. s.l.	aggr. s.l.
Amelanchier canadensis	sp.	Amelanchier canadensis	sp.
Amelanchier embergeri	sp.	Amelanchier ovalis subsp. ovalis	subsp.
Anacamptis coriophora subsp. coriophora		Anacamptis coriophora
Anacamptis pyramidalis var. pyramidalis		Anacamptis pyramidalis
Anacamptis x ticinensis	hyb.-sp.	Anacamptis x ticinensis	hyb.-sp.	http://www.worldfloraonline.org/taxon/wfo-0000807681
Anagallis arvensis subsp. arvensis		Anagallis arvensis
Anchusa arvensis aggr.	aggr.	Lycopsis arvensis aggr.	aggr.
Anchusa arvensis subsp. arvensis		Lycopsis arvensis
Androsace cinerea	sp.	Androsace vitaliana subsp. cinerea	subsp.
Androsace halleri aggr.	aggr.	Androsace halleri aggr. s.l.	aggr. s.l.
Androsace sesleri	sp.	Androsace vitaliana subsp. sesleri	subsp.
Androsace vitaliana aggr.	aggr.	Androsace vitaliana	sp.
Anemone alpina subsp. alpina		Pulsatilla alpina subsp. alpina
Anemone japonica	sp.	Anemone hupehensis	sp.
Anemone nemorosa subsp. nemorosa		Anemone nemorosa
Anemone nemorosa x ranunculoides	hyb.-sp. (formula)	Anemome x lipsiensis	hyb.-sp.
Anemone pulsatilla subsp. pulsatilla		Pulsatilla vulgaris subsp. vulgaris
Anemone ranunculoides subsp. ranunculoides		Anemone ranunculoides
Anemone rubra var. rubra		Pulsatilla rubra
Anemone rubra var. serotina		Pulsatilla rubra
Anisantha madritensis aggr.	aggr.	Anisantha madritensis aggr. s.l.	aggr. s.l.
Anthemis altissima aggr.	aggr.	Cota altissima aggr.	aggr.
Anthemis carpatica subsp. carpatica		Anthemis cretica subsp. carpatica
Anthemis cretica aggr.	aggr.	Anthemis cretica	sp.
Anthemis tinctoria aggr.	aggr.	Cota tinctoria aggr.	aggr.
Anthemis tinctoria subsp. tinctoria		Cota tinctoria subsp. tinctoria
Anthoxanthum nipponicum	sp.	Anthoxanthum alpinum	sp.
Anthoxanthum nipponicum	Species	Anthoxanthum alpinum
Anthriscus alpina	sp.	Anthriscus sylvestris subsp. alpinus	subsp.
Anthriscus caucalis var. caucalis		Anthriscus caucalis
Anthriscus caucalis var. gymnocarpa		Anthriscus caucalis
Anthriscus cerefolium var. cerefolium		Anthriscus cerefolium
Anthriscus stenophyllus	sp.	Anthriscus sylvestris subsp. stenophyllus	subsp.
Anthriscus trichospermus		Anthriscus cerefolium
Anthyllis guyoti	sp.	Anthyllis vulneraria subsp. guyotii	subsp.
Anthyllis montana aggr.	aggr.	Anthyllis montana	sp.
Anthyllis pseudovulneraria	Species	Anthyllis vulneraria subsp. carpatica
Anthyllis versicolor	sp.	Anthyllis vulneraria subsp. versicolor	subsp.
Anthyllis vulneraria aggr.	aggr.	Anthyllis vulneraria	sp.
Anthyllis vulneraria subsp. cantabrica	subsp.	Anythyllis vulneraria subsp. gandogeri	subsp.	WFO (2022), POWO (2022)
Anthyllis vulneraria subsp. pseudovulneraria	Subspecies	Anthyllis vulneraria subsp. carpatica		WFO (2022)
Antirrhinum majus subsp. majus var. majus		Antirrhinum majus subsp. majus
Antirrhinum majus subsp. majus var. majus		Antirrhinum majus subsp. majus
Antirrhinum majus subsp. majus var. pseudomajus		Antirrhinum majus subsp. majus
Antirrhinum majus subsp. majus var. striatus		Antirrhinum majus
Apium graveolens subsp. graveolens		Apium graveolens
Apium nodiflorum aggr.	aggr.	Helosciadium nodiflorum aggr.	aggr.
Aquilegia nigricans subsp. nigricans		Aquilegia nigricans
Aquilegia vulgaris subsp. vulgaris		Aquilegia vulgaris
Arabis alpina aggr.	aggr.	Arabis alpina	sp.
Arabis arabiformis	Species	Arabis vochinensis
Arabis bellidifolia aggr.	aggr.	Arabis pumila aggr.	aggr.
Arctium lappa aggr.	aggr.	Arctium lappa aggr. s.l.	aggr. s.l.
Arenaria bernensis	sp.	Arenaria ciliata	sp.
Arenaria gothica subsp. moehringioides	subsp.	Arenaria multicaulis	sp.	Euro+Med (2022)
Aria obtusifolia	sp.	Sorbus obtusifolia	sp.
Aria rupicola	sp.	Sorbus rupicola	sp.
Armeniaca mandshurica	sp.	Prunus armeniaca	sp.
Armeniaca sibirica	sp.	Prunus sibirica	sp.
Armeria elongata subsp. elongata		Armeria maritima subsp. elongata
Armeria elongata subsp. serpentini		Armeria alpina subsp. halleri		Wisskirchen & Haeupler (1998)
Arrhenatherum elatius aggr.	aggr.	Arrhenatherum elatius	sp.
Artemisia austriaca aggr.	aggr.	Artemisia austriaca	sp.
Artemisia campestris aggr.	aggr.	Artemisia campestris	sp.
Artemisia maritima subsp. maritima var. maritima		Artemisia maritima subsp. maritima
Artemisia maritima subsp. maritima var. pseudogallica		Artemisia maritima subsp. maritima
Artemisia serotina	sp.	Artemisia oliveriana	sp.
Asarum europaeum aggr.	aggr.	Asarum europaeum	sp.
Asarum europaeum var. romanicum	Variety	Asarum europaeum subsp. europaeum
Asarum italicum	sp.	Asarum europaeum subsp. italicum	subsp.
Asparagus caspius	Species	Asparagus officinalis
Asplenium adiantum-nigrum aggr.	aggr.	Asplenium adiantum-nigrum	sp.
Asplenium ceterach subsp. officinarum		Asplenium ceterach subsp. ceterach
Asplenium cuneifolium subsp. cuneifolium	subsp.	Asplenium adiantum-nigrum subsp. serpentini	subsp.	Autonym
Asplenium fontanum subsp. fontanum	subsp.	Asplenium fontanum	sp.	Autonym
Asplenium hastatum	sp.	Asplenium trichomanes subsp. hastatum	subsp.
Asplenium heufleri	sp	Asplenium × alternifolium nothosubsp. heufleri	nothosubsp.
Asplenium inexpectans	sp.	Asplenium trichomanes subsp. inexpectans	subsp.
Asplenium obovatum aggr.	aggr.	Asplenium obovatum	sp.
Asplenium pachyrachis	sp.	Asplenium trichomanes subsp. pachyrachis	subsp.
Asplenium presolanense	sp.	Asplenium adulterinum subsp. presolanense	subsp.
Asplenium quadrivalens	sp.	Asplenium trichomanes subsp. quadrivalens	subsp.
Asplenium ruta-muraria aggr.	aggr.	Asplenium ruta-muraria	sp.
Asplenium scolopendrium subsp. scolopendrium	subsp.	Asplenium scolopendrium	sp.	Autonym
Asplenium trichomanes aggr.	aggr.	Asplenium trichomanes	sp.
Aster novi-belgii aggr.	aggr.	Symphotrichum novi-belgii aggr.	aggr.
Aster sedifolius aggr.	aggr.	Galatella sedifolia	sp.
Aster sedifolius subsp. sedifolius		Galatella sedifolia subsp. sedifolia
Aster tradescantii	Species	Symphyotrichum tradescantii
Aster tradescantii	Species	Symphyotrichum tradescantii
Aster tradescantii	Species	Symphyotrichum tradescantii
Aster tradescantii	Species	Symphyotrichum tradescantii
Aster tripolium fo. discoideus		Tripolium pannonicum subsp. tripolium
Astragalus onobrychis subsp. onobrychis		Astragalus onobrychis
Astragalus sect. Acanthophace	sect.	Astragalus sect. Acanthophace	sect.
Astragalus sempervirens aggr.	aggr.	Astragalus sempervirens	sp.
Astragalus tragacantha subsp. terraccianoi	subsp.	Astragalus terraccianoi	sp.
Astragalus vesicarius aggr.	aggr.	Astragalus vesicarius	sp.
Astrantia carinthiaca	sp.	Astrantia major subsp. involucrata	subsp.
Astrantia major aggr.	aggr.	Astrantia major	sp.
Atractylis cancellata subsp. cancellata		Atractylis cancellata
Atractylis humilis subsp. humilis		Atractylis humilis
Atragene ochotensis	sp.	Clematis alpina subsp. ochotensis	subsp.
Atriplex hortensis var. hortensis		Atriplex hortensis
Atriplex hortensis var. rubra		Atriplex hortensis
Atriplex longipes subsp. longipes		Atriplex longipes
Atriplex patula var. bracteata		Atriplex patula
Atriplex patula var. patula		Atriplex patula
Atriplex prostrata var. longipes		Atriplex longipes
Atriplex prostrata var. prostrata		Atriplex prostrata
Aubrieta intermedia		Aubrieta intermedia
Avena nuda aggr.	aggr.	Avena nuda	sp.
Avenella corsica	sp.	Avenella flexuosa subsp. corsica	subsp.
Avenella flexuosa aggr.	aggr.	Avenella flexuosa	sp.
Avenula pratensis aggr.	aggr.	Helictochloa pratensis aggr.	aggr.
Azolla filiculoides aggr.	aggr.	Azolla filiculoides	sp.
Baeothryon alpinum	sp.	Trichophorum alpinum	sp.
Baeothryon alpinum	Species	Trichophorum alpinum
Baeothryon alpinum	Species	Trichophorum alpinum
Baeothryon alpinum	Species	Trichophorum alpinum
Baldellia repens subsp. cavanillesii	subsp.	Baldellia ranunculoides subsp. repens	subsp.
Ballota nigra aggr.	aggr.	Ballota nigra	sp.
Barbarea vulgaris aggr.	aggr.	Barbarea vulgaris	sp.
Barbarea vulgaris subsp. lepuznica		Barbarea vulgaris
Bassia scoparia subsp. scoparia		Bassia scoparia
Batrachium aquatile aggr.	aggr.	Ranunculus aquatilis aggr.	aggr.
Batrachium kauffmannii		Ranunculus trichophyllus
Betonica alopecuros subsp. alopecuros		Stachys alopecuros subsp. alopecuros
Betula alba aggr.	aggr.	Betula pendula aggr.	aggr.
Betula cajanderi	sp.	Betula pendula subsp. mandshurica	subsp.
Betula divaricata	sp.	Betula fruticosa	sp.
Betula exilis	sp.	Betula glandulosa	sp.
Betula fusca	sp.	Betula fruticosa	sp.
Betula lutea	sp.	Betula alleghaniensis	sp.
Betula obscura	sp.	Betula pendula var. pendula	var.
Betula pendula var. obscura		Betula pendula
Betula pendula var. pendula		Betula pendula
Betula platyphylla	sp.	Betula pendula subsp. mandshurica	subsp.
Betula x oycoviensis	hyb.-sp.	Betula pendula var. oycowiensis	var.
Biarum davisii subsp. davisii	subsp.	Biarum davisii	sp.	Autonym
Bidens tripartita subsp. comosa		Bidens comosa
Biscutella hispidissima	Species	Biscutella laevigata subsp. hispidissima
Bituminaria bituminosa var. bituminaria		Bituminaria bituminosa
Bituminaria bituminosa var. palaestina		Bituminaria bituminosa
Blackstonia acuminata subsp. acuminata		Blackstonia perfoliata subsp. serotina
Blackstonia perfoliata aggr.	aggr.	Blackstonia perfoliata	sp.
Bolboschoenus maritimus subsp. maritimus		Bolboschoenus maritimus
Borkhausenia intermedia	sp.	Sorbus intermedia	sp.
Brassica elongata aggr.	aggr.	Brassica elongata	sp.
Brassica napus var. napus		Brassica napus
Brassica oleracea subsp. landra		Raphanus raphanistrum subsp. landra
Brassica rapa aggr.	aggr.	Brassica rapa	sp.
Brassica repanda aggr.	aggr.	Brassica repanda	sp.
Bromopsis commutatus		Bromus commutatus
Bromopsis mollis		Bromus hordeaceus
Bromopsis secalinus		Bromus secalinus
Bromopsis sterilis		Anisantha sterilis
Bromopsis tectorum		Anisantha tectorum
Bromus arvensis aggr.	aggr.	Bromus arvensis aggr. s.l.	aggr. s.l.
Bromus catharticus aggr.	aggr.	Ceratochloa cathartica aggr.	aggr.
Bromus diandrus aggr.	aggr.	Anisantha diandra aggr.	aggr.
Bromus erectus aggr.	aggr.	Bromopsis erecta aggr.	aggr.
Bromus erectus subsp. erectus		Bromopsis erecta subsp. erecta
Bromus inermis aggr.	aggr.	Bromopsis inermis aggr.	aggr.
Bromus madritensis aggr.	aggr.	Anisantha madritensis aggr. s.l.	aggr. s.l.
Bromus microtrichus	sp.	Bromopsis condensata subsp. microtricha	subsp.
Bromus pseudothominei	Species	Bromus hordeaceus subsp. pseudothominei
Bromus pseudothominei	sp.	Bromus hordeaceus subsp. pseudothominei	subsp.	Müller et al. (2021)
Bromus ramosus aggr.	aggr.	Bromopsis ramosa aggr.	aggr.
Bromus riparius subsp. riparius		Bromopsis riparia
Bromus transylvanicus	sp.	Bromopsis erecta subsp. transsilvanica
Bryonia cretica subsp. cretica		Bryonia cretica
Bubon macedonicum subsp. macedonicum	subsp.	Bubon macedonicum	sp.	Autonym
Buglossoides permixta	sp.	Buglossoides arvensis subsp. permixta	subsp.
Buillardia vaillantii	Species	Crassula vaillantii
Bunium bulbocastanum var. bulbocastanum		Bunium bulbocastanum
Buphthalmum salicifolium aggr.	aggr.	Buphthalmum salicifolium	sp.
Bupleurum diversifolium		Bupleurum falcatum subsp. cernuum
Bupleurum ranunculoides aggr.	aggr.	Bupleurum ranunculoides	sp.
Bupleurum ranunculoides subsp. ranunculoides var. ranunculoides		Bupleurum ranunculoides subsp. ranunculoides
Butomus umbellatus var. vallisneriifolius		Butomus umbellatus
Calamagrostis langsdorffii	Species	Calamagrostis purpurea subsp. langsdorfii
Calamintha einseleana		Clinopodium nepeta subsp. subisodontum
Calamintha nepeta aggr.	aggr.	Clinopodium nepeta aggr.	aggr.
Calendula arvensis subsp. arvensis		Calendula arvensis
Callitriche palustris aggr.	aggr.	Callitriche palustris aggr. s.l.	aggr. s.l.
Caltha palustris subsp. araneosa		Caltha palustris
Caltha palustris subsp. palustris		Caltha palustris
Caltha palustris var. palustris		Caltha palustris
Camelina microcarpa subsp. microcarpa		Camelina microcarpa
Camelina sativa var. pilosa		Camelina sativa
Camelina sativa var. sativa	var.	Camelina sativa	sp.	Autonym
Campanula barbata aggr.	aggr.	Campanula barbata	sp.
Campanula barbata subsp. barbata		Campanula barbata
Campanula bellidifolia var. longysepala		Campanula bellidifolia
Campanula cantabrica subsp. cantabrica		Campanula cantabrica
Campanula carniolica	sp.	Campanula thyrsoides	sp.
Campanula glomerata aggr.	aggr.	Campanula glomerata	sp.
Campanula hohenackeri var. darialica		Campanula sibirica
Campanula patula aggr.	aggr.	Campanula patula	sp.
Campanula petraea aggr.	aggr.	Campanula petraea	sp.
Campanula petrophila var. exapendiculata		Campanula petrophila
Campanula puberula	sp.	Campanula carnica	sp.
Campanula sibirica subsp. sibirica		Campanula sibirica
Campanula strictopedunculata	sp.	Campanula barbata	sp.
Campanula thyrsoides aggr.	aggr.	Campanula thyrsoides	sp.
Campanula thyrsoides subsp. thyrsoides		Campanula thyrsoides
Cannabis sativa var. sativa		Cannabis sativa
Capparis spinosa aggr.	aggr.	Capparis spinosa aggr. s.l.	aggr. s.l.
Capsella bursa-pastoris var. brachycarpa	Variety	Capsella bursa-pastoris		WFO
Cardamine amara + opicii	list	Cardamine amara	sp.
Cardamine amara aggr.	aggr.	Cardamine amara	sp.
Cardamine austriaca	sp.	Cardamine amara subsp. austriaca	subsp.
Cardamine hirsuta aggr.	aggr.	Cardamine hirsuta aggr. s.l.	aggr.
Cardamine pratensis subsp. pratensis		Cardamine pratensis
Cardaminopsis arenosa aggr.	aggr.	Arabidopsis arenosa	sp.
Cardaminopsis arenosa subsp. arenosa		Arabidopsis arenosa subsp. arenosa
Cardaminopsis dependens	sp.	Arabidopsis arenosa subsp. borbasii	subsp.	Euro+Med (2022)
Cardaminopsis halleri aggr.	aggr.	Arabidopsis halleri	sp.
Cardaminopsis halleri subsp. halleri		Arabidopsis halleri
Cardaria pubescens		Lepidium appelianum
Carduus crassifolius subsp. crassifolius		Carduus defloratus subsp. summanus
Carduus defloratus aggr.	aggr.	Carduus defloratus	sp.
Carduus nigrescens aggr.	aggr.	Carduus nigrescens	sp.
Carduus nutans aggr.	aggr.	Carduus nutans	sp.
Carduus x stangii	hyb.-sp.	Carduus x polyacanthos	hyb.-sp.
Carex acuta subsp. acuta		Carex acuta
Carex arctica	sp.	Carex stenophylla	sp.
Carex austroalpina	Species	Carex australpina
Carex brizoides aggr.	aggr.	Carex praecox aggr.	aggr.
Carex brunnescens var. brunnescens		Carex brunnescens
Carex capillaris var. major		Carex capillaris subsp. capillaris
Carex caryophyllea var. insularis		Carex caryophyllea
Carex castanea		Carex ornithopoda
Carex cesanensis	Species	Carex muricata subsp. muricata
Carex colchica subsp. colchica		Carex colchica
Carex concolor	sp.	Carex aquatilis	sp.
Carex concolor	sp.	Carex aquatilis	sp.
Carex curvula aggr.	aggr.	Carex curvula	sp.
Carex digitata var. digitata		Carex digitata
Carex disticha subsp. disticha		Carex disticha
Carex divisa subsp. divisa		Carex divisa
Carex ferruginea subsp. ferruginea		Carex ferruginea
Carex flacca aggr.	aggr.	Carex flacca	sp.
Carex flava var. flava		Carex flava
Carex fyllae	Species	Carex bigelowii subsp. dacica
Carex lachenalii subsp. lachenalii		Carex lachenalii
Carex leporina var. argyroglochin		Carex leporina
Carex leporina var. leporina		Carex leporina
Carex nigra aggr.	aggr.	Carex nigra	sp.
Carex nigra subsp. nigra		Carex nigra
Carex norvegica aggr.	aggr.	Carex norvegica	sp.
Carex oederi		Carex viridula
Carex oederi	sp.	Carex viridula	sp.
Carex oederi subsp. oederi		Carex viridula
Carex ornithopoda subsp. ornithopoda		Carex ornithopoda
Carex ornithopoda subsp. ornithopodioides		Carex ornithopoda
Carex ornithopoda var. castanea		Carex ornithopoda
Carex ornithopoda var. ornithopoda		Carex ornithopoda
Carex pediformis aggr.	aggr.	Carex pediformis	sp.
Carex praecox subsp. praecox		Carex praecox
Carex pusteriana	sp.	Carex norvegica subsp. pusteriana	subsp.
Carex viridula subsp. viridula		Carex viridula
Carex viridula var. pulchella		Carex viridula
Carex viridula var. viridula		Carex viridula
Carlina acaulis aggr.	aggr.	Carlina acaulis	sp.
Carum carvi subsp. carvi		Carum carvi
Carum multiflorum subsp. multiflorum		Hellenocarum multiflorum
Cassia obtusifolia	sp.	Senna obtusifolia	sp.
Catananche lutea subsp. lutea		Catananche lutea
Caucalis platycarpos subsp. platycarpos		Caucalis platycarpos
Centaurea cineraria subsp. cineraria		Centaurea cineraria
Centaurea hanryi	Species	Centaurea hanrii
Centaurea hanryi subsp. shuttleworthii	Subspecies	Centaurea hanrii
Centaurea jordaniana aggr.	aggr.	Centaurea jordaniana	sp.
Centaurea ligustica	sp.	Centaurea aplolepa subsp. parvula	subsp.
Centaurea maculosa subsp. maculosa		Centaurea stoebe
Centaurea mollis subsp. mollis		Cyanus mollis
Centaurea montana aggr.	aggr.	Cyanus montanus aggr.	aggr.
Centaurea montana subsp. montana		Cyanus montanus
Centaurea phrygia aggr.	aggr.	Centaurea phrygia	sp.
Centaurea scabiosa aggr.	aggr.	Centaurea scabiosa	sp.
Centaurea spinosa subsp. spinosa		Centaurea spinosa
Centaurea stenolepis subsp. stenolepis		Centaurea phrygia subsp. stenolepis
Centaurea tenuiflora	sp.	Centaurea kanitziana	sp.
Centaurea tenuiflora var. fastigiata		Centaurea kanitziana
Centaurea triumfettii	sp.	Cyanus triumfettii	sp.
Centaurea uniflora aggr.	aggr.	Centaurea uniflora aggr.	aggr.
Centaurium erythraea subsp. erythraea var. capitatum		Centaurium erythraea subsp. erythraea
Centaurium erythraea subsp. erythraea var. erythraea		Centaurium erythraea subsp. erythraea
Centaurium umbellatum		Centaurium erythraea
Cephalaria uralensis subsp. multifida		Cephalaria uralensis
Cerastium brachypetalum aggr.	aggr.	Cerastium brachypetalum	sp.
Cerastium crassiusculum	sp.	Cerastium pumilum subsp. pumilum	subsp.
Cerastium fontanum aggr.	aggr.	Cerastium fontanum	sp.
Cerastium holosteoides subsp. vulgare		Cerastium fontanum subsp. vulgare
Cerastium polymorphum var. decumbens		Cerastium polymorphum
Cerastium polymorphum var. latifolium		Cerastium polymorphum
Cerastium pumilum aggr.	aggr.	Cerastium pumilum	sp.
Cerastium semidecandrum subsp. semidecandrum		Cerastium semidecandrum
Cerastium stenopetalum	Species	Cerastium soleirolii
Ceratophyllum demersum subsp. demersum		Ceratophyllum demersum
Cercis siliquastrum subsp. siliquastrum		Cercis siliquastrum
Cerinthe alpina subsp. alpina		Cerinthe glabra subsp. glabra
Cerinthe major subsp. major		Cerinthe major
Cerinthe minor aggr.	aggr.	Cerinthe minor	sp.
Ceterach officinarum aggr.	aggr.	Asplenium ceterach	sp.
Chaenorrhinum litorale	sp.	Microrrhinum litorale
Chaenorrhinum minus	sp.	Microrrhinum minus
Chaenorrhinum minus		Microrrhinum minus
Chaenorrhinum minus aggr.	aggr.	Microrrhinum minus aggr.	aggr.
Chaenorrhinum origanifolium	sp.	Chaenorhinum origanifolium
Chaenorrhinum rubrifolium	sp.	Chaenorhinum rubrifolium subsp. rubrifolium
Chaerophyllum bulbosum subsp. bulbosum		Chaerophyllum bulbosum
Chaerophyllum cicutariiforme	sp.	Chaerophyllum villarsii
Chamaecytisus ciliatus subsp. ciliatus		Cytisus hirsutus
Chamaecytisus falcatus	sp.	Cytisus hirsutus
Chamaecytisus hirsutus aggr.	aggr.	Cytisus hirsutus aggr.	aggr.
Chamaecytisus hirsutus subsp. ciliatus		Cytisus hirsutus
Chamaecytisus hirsutus subsp. hirsutus	subsp.	Cytisus hirsutus	sp.	Autonym
Chamaecytisus hirsutus subsp. leucotrichus		Cytisus hirsutus
Chamaecytisus pumilus	sp.	Cytisus triflorus subsp. pumilus
Chamaecytisus x versicolor	hyb.-sp.	Cytisus x versicolor	hyb.-sp.
Chamaenerion palustre	sp.	Epilobium palustre	sp.
Chamaesyce canescens subsp. canescens		Euphorbia chamaesyce
Chelidonium majus subsp. majus		Chelidonium majus
Chenopodium glaucum subsp. glaucum		Oxybasis glauca
Chenopodium glaucum subsp. wolffii		Oxybasis glauca
Chenopodium rubrum aggr.	aggr.	Oxybasis rubra aggr.	aggr.
Chenopodium strictum	Species	Chenopodium betaceum
Chenopodium urbicum subsp. urbicum		Oxybasis urbica
Chenopodium urbicum var. intermedium		Oxybasis urbica
Chenopodium urbicum var. urbicum		Oxybasis urbica
Chosenia arbutifolia	sp.	Salix arbutifolia	sp.
Cichorium intybus subsp. intybus		Cichorium intybus
Circaea alpina subsp. alpina		Circaea alpina
Cirsium brevipapposum		Cirsium brevipapposum
Cirsium eriophorum subsp. eriophorum		Cirsium eriophorum
Cirsium monspessulanum subsp. monspessulanum		Cirsium monspessulanum
Cirsium oleraceum x palustre	hyb.-sp. (formula)	Cirsium x hybridum	hyb.-sp.	Müller et al. (2021)
Cirsium x pulchrum	hyb.-sp.	Cirsium x csepeliense	hyb.-sp.
Citrus limon	Species	Citrus x limon	hybr.-sp.	https://en.wikipedia.org/wiki/Citrus_taxonomy
Citrus sinensis	Species	Citrus x aurantium	hybr.-sp.	https://en.wikipedia.org/wiki/Citrus_taxonomy
Cladium mariscus subsp. mariscus		Cladium mariscus
Cleome sesquiorygalis	sp.	Cleome hassleriana
Clinopodium calamintha aggr.	aggr.	Clinopodium nepeta aggr.	aggr.
Clinopodium nepeta subsp. ascendens		Clinopodium menthifolium subsp. ascendens
Clinopodium vulgare aggr.	aggr.	Clinopodium vulgare	sp.
Cnidium silaifolium subsp. silaifolium		Selinum silaifolium
Cochlearia atlantica		Cochlearia officinalis subsp. officinalis
Coeloglossum viride subsp. viride		Dactylorhiza viridis
Coincya cheiranthos aggr.	aggr.	Coincya monensis subsp. cheiranthos	subsp.
Coincya montana	sp.	Coincya monensis subsp. cheiranthos
Colutea arborescens aggr.	aggr.	Colutea arborescens	sp.
Colutea gallica	sp.	Colutea arborescens subsp. gallica
Conioselinum fischeri	Species	Conioselinum tataricum
Consolida regalis aggr.	aggr.	Consolida regalis	sp.
Consolida regalis subsp. regalis var. glanduligera		Consolida regalis subsp. regalis
Consolida regalis subsp. regalis var. regalis		Consolida regalis subsp. regalis
Convallaria majalis var. majalis		Convallaria majalis
Convolvulus betonicifolius subsp. betonicifolius		Convolvulus betonicifolius
Convolvulus oleifolius var. oleifolius		Convolvulus oleifolius
Convolvulus oleifolius var. scopulorum		Convolvulus oleifolius
Convolvulus sepium subsp. sepium		Calystegia sepium
Convolvulus x lucanus	hyb.-sp.	Calystegia x lucana	hyb.-sp.
Conyza canadensis aggr.	aggr.	Erigeron canadensis aggr.	aggr.
Coristospermum lucidum subsp. lucidum		Ligusticum lucidum
Cornus sanguinea aggr.	aggr.	Cornus sanguinea	sp.
Corydalis alba	sp.	Pseudofumaria alba
Corydalis gigantea	sp.	Corydalis gigantea	sp.
Corydalis pauciflora	sp.	Corydalis pauciflora	sp.
Corydalis x kirschlegeri	hyb.-sp.	Corydalis x hausmannii	hyb.-sp.
Cotoneaster atropurpureus	sp.	Cotoneaster horizontalis	sp.	WFO (2022)
Cotoneaster dammeri aggr.	aggr.	Cotoneaster dammeri aggr. s.l.	aggr. s.l.
Cotoneaster horizontalis aggr.	aggr.	Cotoneaster horizontalis aggr. s.l.	aggr. s.l.
Cotoneaster intermedius	sp.	Cotoneaster x intermedius	hyb.-sp.
Cotoneaster melanocarpus aggr.	aggr.	Cotoneaster laxiflorus	sp.
Cotoneaster microphyllus aggr.	aggr.	Cotoneaster microphyllus	sp.
Cotoneaster veitchii	sp.	Cotoneaster sylvestrii	sp.	https://powo.science.kew.org/taxon/urn:lsid:ipni.org:names:722723-1
Crataegus ceratocarpa	sp.	Crataegus x subsphaerica	hyb.-sp.
Crataegus curvisepala aggr.	aggr.	Crataegus rhipdophylla	sp.
Crataegus laevigata aggr.	aggr.	Crataegus laevigata	sp.
Crataegus levigata aggr.	aggr.	Crataegus laevigata	sp.
Crataegus monogyna aggr.	aggr.	Crataegus monogyna aggr. s.l.	aggr. s.l.
Crataegus monogyna subsp. monogyna		Crataegus monogyna
Crataegus monogyna var. monogyna		Crataegus monogyna
Crepis foetida aggr.	aggr.	Crepis foetida	sp.
Crepis fraasii subsp. fraasii		Crepis fraasii
Crepis jacquinii aggr.	aggr.	Crepis jacquinii	sp.
Crepis vesicaria aggr.	aggr.	Crepis vesicaria	sp.
Crocus boryi subsp. boryi		Crocus boryi
Crocus vernus aggr.	aggr.	Crocus vernus	sp.
Cuscuta europaea subsp. europaea		Cuscuta europaea
Cuscuta palaestina subsp. palaestina		Cuscuta palaestina
Cuscuta scandens subsp. tinei		Cuscuta australis subsp. tinei
Cyanus nanus	Species	Cyanus triumfettii subsp. nanus
Cyclamen graecum subsp. anatolicum		Cyclamen graecum
Cyclamen graecum subsp. candicum		Cyclamen graecum
Cyclamen graecum subsp. graecum		Cyclamen graecum
Cynoglossum germanicum aggr.	aggr.	Cynoglossum germanicum	sp.
Cynoglossum rotundum	sp.	Cynoglossum germanicum subsp. rotundum
Cyperus esculentus var. esculentus		Cyperus esculentus
Cyperus flavus	sp.	Cyperus aggregatus
Cyperus laevigatus subsp. laevigatus		Cyperus laevigatus
Cyperus longus subsp. longus		Cyperus longus
Cyperus papyrus subsp. papyrus		Cyperus papyrus
Cystopteris fragilis aggr.	aggr.	Cystopteris fragilis	sp.
Cystopteris regia		Cystopteris fragilis subsp. alpina
Cystopteris regia	sp.	Cystopteris fragilis subsp. alpina	subsp.	WFO (2022)
Cytisus atratus	sp.	Lembotropis nigricans
Cytisus commutatus subsp. commutatus		Cytisus commutatus
Cytisus lanigerus	Species	Calicotome villosa
Cytisus lotoides	sp.	Cytisus hirsutus	sp.	WFO (2022)
Cytisus nigricans aggr.	aggr.	Lembotropis nigricans	sp.
Cytisus oromediterraneus	Species	Cytisus balansae subsp. europaeus
Cytisus scoparius var. prostratus		Cytisus scoparius subsp. maritimus
Cytisus spinosus	Species	Calicotome spinosa
Cytisus spinosus	Species	Calicotome spinosa subsp. ligustica	subsp.
Dactylis glomerata aggr.	aggr.	Dactylis glomerata	sp.
Dactylis reichenbachii	sp.	Dactylis glomerata subsp. reichenbachii
Dactylorhiza fuchsii + sooiana	list	Dactylorhiza fuchsii	sp.
Dactylorhiza fuchsii subsp. transsilvanica		Dactylorhiza maculata subsp. transsilvanica
Dactylorhiza incarnata aggr.	aggr.	Dactylorhiza incarnata	sp.
Dactylorhiza incarnata subsp. incarnata var. incarnata		Dactylorhiza incarnata subsp. incarnata
Dactylorhiza incarnata subsp. incarnata var. serotina		Dactylorhiza incarnata subsp. pulchella
Dactylorhiza maculata aggr.	aggr.	Dactylorhiza maculata aggr. s.l.	aggr. s.l.
Dactylorhiza occitanica	Species	Dactylorhiza elata
Dactylorhiza x predaensis	hyb.-sp.	Dactylorhiza x aschersoniana nothosubsp. predaensis	nothosubsp.
Dactylorhiza x uliginosa	hyb.-sp.	Dactylorhiza x aschersoniana	hyb.-sp.
Dactylorhiza x vermeuleniana	hyb.-sp.	Dactylorhiza x senayi nothosubsp. vermeuleniana	nothosubsp.
Dactylorhiza x wintonii	hyb.-sp.	x Dactylodenia wintonii	hyb.-g.
Danthonia decumbens aggr.	aggr.	Danthonia decumbens	sp.
Daphne alpina aggr.	aggr.	Daphne alpina	sp.
Daphne mezereum subsp. mezereum	subsp.	Daphne mezereum	sp.	Autonym
Daphne scopoliana	sp.	Daphne alpina	sp.	WFO (2022)
Dasiphora fruticosa subsp. floribunda	Subspecies	Dasiphora fruticosa
Datura stramonium var. stramonium	var.	Datura stramonium subsp. stramonium	subsp.
Daucus carota subsp. carota var. carota	subsp.	Daucus carota subsp. carota	subsp.	Autonym
Daucus carota subsp. gadeceaui	Subspecies	Daucus carota subsp. gadecaei
Daucus carota subsp. maximus var. maximus	Subspecies	Daucus carota subsp. maximus
Delphinium consolida subsp. consolida	subsp.	Consolida regalis subsp. regalis	subsp.
Delphinium helveticum	sp.	Delphinium elatum subsp. helveticum
Delphinium songoricum	sp.	Delphinium camptocarpum	sp.
Delphinium stiriacum	sp.	Delphinium elatum subsp. austriacum
Deschampsia cespitosa aggr.	aggr.	Deschampsia cespitosa	sp.
Deutzia crenata aggr.	aggr.	Deutzia crenata	sp.
Dianthus alpestris	sp.	Dianthus carthusianorum subsp. latifolius
Dianthus dissimilis	sp.	Dianthus furcatus subsp. dissimilis
Dianthus furcatus aggr.	aggr.	Dianthus furcatus	sp.
Dianthus glabriusculus		Dianthus collinus subsp. glabriusculus
Dianthus guliae	Species	Dianthus ferrugineus
Dianthus lereschii	sp.	Dianthus furcatus subsp. lereschii
Dianthus plumarius aggr.	aggr.	Dianthus plumarius	sp.
Dianthus polymorphus	Species	Dianthus platyodon
Dianthus polymorphus	Species	Dianthus platyodon
Dianthus puberulus		Dianthus carthusianorum
Dianthus seguieri aggr.	aggr.	Dianthus seguieri	sp.
Dianthus seguieri subsp. pseudocollinus	Subspecies	Dianthus seguieri subsp. glaber
Dianthus superbus aggr.	aggr.	Dianthus superbus	sp.
Dianthus sylvestris aggr.	aggr.	Dianthus sylvestris	sp.
Dianthus tenuifolius		Dianthus carthusianorum
Dichodon cerastioides	sp.	Cerastium cerastoides	sp.
Dichodon dubium		Cerastium dubium
Dictamnus albus subsp. albus	subsp.	Dictamnus albus	sp.	Autonym
Digitaria sanguinalis aggr.	aggr.	Digitaria sanguinalis aggr. s.l.	aggr. s.l.
Diphasiastrum complanatum aggr.	aggr.	Lycopodium complanatum aggr.	aggr.
Diphasiastrum complanatum subsp. complanatum	subsp.	Lycopodium complanatum	sp.	Autonym
Diplotaxis muralis subsp. muralis	subsp.	Diplotaxis muralis	sp.	Autonym
Diplotaxis tanaitica	sp.	Diplotaxis tenuifolia	sp.
Doronicum glaciale aggr.	aggr.	Doronicum glaciale	sp.
Dorycnium pentaphyllum aggr.	aggr.	Dorycnium pentaphyllum	sp.
Draba bryoides var. imbricata		Draba imbricata
Draba bryoides var. squarrosa		Draba bryoides
Draba elongata		Draba lasiocarpa subsp. lasiocarpa
Draba glabella	sp.	Draba daurica	sp.
Draba incana aggr.	aggr.	Draba incana	sp.
Dracocephalum triflorum		Dracocephalum thymiflorum
Dryas octopetala subsp. octopetala	subsp.	Dryas octopetala	sp.	Autonym
Dryopteris affinis aggr.	aggr.	Dryopteris filix-mas aggr.	aggr.
Dryopteris austriaca		Dryopteris dilatata
Dryopteris austriaca	Species	Dryopteris dilatata
Dryopteris austriaca	Species	Dryopteris dilatata
Dryopteris carthusiana var. elevata	Variety	Dryopteris carthusiana
Dryopteris dilatata aggr.	aggr.	Dryopteris carthusiana aggr.	aggr.
Dryopteris expansa var. alpina	var.	Dryopteris expansa	sp.
Dryopteris villarii subsp. villarii	subsp.	Dryopteris villarii	sp.	Autonym
Dryopteris x complexa nothosubsp. critica	nothosubsp.	Dryopteris x critica	hyb.-sp.	Müller et al. (2021)
Dryopteris x tavelii	hyb.-sp.	Dryopteris x complexa	hyb.-sp.	Wisskirchen & Haeupler (1998)
Edraianthus graminifolius subsp. kitaibelii		Edraianthus graminifolium
Elatine hydropiper aggr.	aggr.	Elatine hydropiper aggr. s.l.	aggr. s.l.
Elatine hydropiper subsp. hydropiper	subsp.	Elatine hydropiper	sp.	Autonym
Elatine hydropiper var. pedunculata	var.	Elatine hydropiper	sp.
Elisanthe zawadskii	sp.	Silene vulgaris	sp.	WFO (2022)
Elymus acutus	Species	Elytrigia atherica
Elymus athericus subsp. athericus	subsp.	Elytrigia atherica	sp.	Autonym
Elymus elongatus subsp. elongatus		Elytrigia elongata subsp. elongata
Elymus farctus subsp. farctus	subsp.	Elytrigia juncea subsp. juncea	subsp.
Elymus hispidus subsp. hispidus	subsp.	Elytrigia intermedia subsp. intermedia	subsp.
Elymus hispidus var. hispidus	var.	Elytrigia intermedia subsp. intermedia	subsp.
Elymus hispidus var. villosus	Variety	Elytrigia intermedia subsp. trichophora
Elymus repens aggr.	aggr.	Elytrigia repens aggr.	aggr.
Elymus repens subsp. repens	subsp.	Elytrigia repens subsp. repens	subsp.
Elytrigia ×duvalii nothosubsp. obtusiuscula	hyb.-subsp.	Elytrigia x obtusiuscula	hyb.-sp.
Elytrigia ×duvalii nothsubsp. obtusiuscula	nothosubsp.	Elytrigia x acuta nothosubsp. obtusiuscula	nothosubsp.	Stace et al. (2015)
Elytrigia acuta	Species	Elytrigia atherica
Elytrigia x obtusiuscula	hyb.-sp.	Elytrigia x acuta nothosubsp. obtusiuscula	nothosubsp.	Stace et al. (2015)
Emerus major	Species	Hippocrepis emerus subsp. emeroides
Empetrum hermaphroditum + nigrum	list	Empetrum nigrum aggr.	aggr.
Empetrum nigrum subsp. nigrum	subsp.	Empetrum nigrum	sp.	Autonym
Eokochia saxicola	Species	Bassia saxicola
Ephedra distachya aggr.	aggr.	Ephedra distachya	sp.
Epilobium nerterioides	sp.	Epilobium brunnescens	sp.
Epilobium x pseudotrigonum	hyb.-sp.	Epilobium x freynii	hyb.-sp.	Müller et al. (2021)
Epipactis helleborine aggr.	aggr.	Epipactis helleborine aggr. s.l.	aggr. s.l.
Epipactis leptochila subsp. provincialis	Subspecies	Epipactis leptochila
Epipactis preinensis	sp.	Epipactis flaminia	sp.	Euro+Med (2022)
Epipactis zaupolensis	sp.	Epipactis tallosii subsp. zaupolensis	subsp.	Euro+Med (2022)
Equisetum alpestre	sp.	Equisetum arvense	sp.
Equisetum arvense aggr.	aggr.	Equisetum arvense	sp.
Equisetum arvense subsp. arvense	subsp.	Equisetum arvense	sp.	Autonym
Equisetum x mackayi	hyb.-sp.	Equisetum x trachyodon	hyb.-sp.	Müller et al. (2021)
Eremogone biebersteinii	sp.	Arenaria procera	sp.
Eremogone cephalotes	sp.	Arenaria cephalotes	sp.
Eremogone koriniana	Species	Arenaria procera subsp. procera
Eremogone micradenia	sp.	Arenaria procera subsp. procera	subsp.
Eremogone pineticola	sp.	Arenaria procera subsp. pubescens	subsp.
Eremogone rigida	sp.	Arenaria rigida	sp.
Eremogone saxatilis	Species	Arenaria procera subsp. procera
Eremogone saxatilis	Species	Arenaria procera subsp. procera
Eremogone saxatilis	sp.	Arenaria procera subsp. procera	subsp.
Eremopyrum hirsutum	Species	Eremopyrum buonapartis subsp. hirsutum
Erica forskalii	Species	Erica manipuliflora
Erigeron acris aggr.	aggr.	Erigeron acris	sp.
Erigeron annuus aggr.	aggr.	Erigeron annuus	sp.
Erinacea anthyllis subsp. anthyllis	subsp.	Erinacea anthyllis	sp.	Autonym
Erodium aethiopicum subsp. aethiopicum	subsp.	Erodium cicutarium	sp.	Autonym
Erodium chium subsp. chium	subsp.	Erodium chium	sp.	Autonym
Erodium cicutarium subsp. cicutarium	subsp.	Erodium cicutarium	sp.	Autonym
Erodium hoefftianum subsp. hoefftianum	subsp.	Erodium hoefftianum	sp.	Autonym
Erodium laciniatum subsp. laciniatum	subsp.	Erodium laciniatum	sp.	Autonym
Erophila majuscula	sp.	Draba verna subsp. verna
Erophila verna aggr.	aggr.	Draba verna aggr.	aggr.
Erucastrum benacensis	sp.	Erucastrum nasturtiifolium subsp. benacense
Erucastrum nasturtiifolium aggr.	aggr.	Erucastrum nasturtiifolium	sp.
Erucastrum supinum	sp.	Sisymbrium supinum	sp.
Erucastrum supinum	Species	Sisymbrium supinum
Erysimum cantabricum		Erysimum duriaei
Erysimum diffusum aggr.	aggr.	Erysimum diffusum	sp.
Erysimum odoratum aggr.	aggr.	Erysimum odoratum aggr. s.l.	aggr. s.l.
Erysimum rhaeticum aggr.	aggr.	Erysimum sylvestre aggr.	aggr.
Erysimum sylvaticum		Erysimum aureum
Erysimum sylvestre aggr.	aggr.	Erysimum sylvestre aggr. s.l.	aggr. s.l.
Erysimum virgatum aggr.	aggr.	Erysimum hieracifolium aggr.	aggr.
Erysimum witmannii subsp. transsilvanicum		Erysimum witmannii
Erythranthe guttata	sp.	Mimulus guttatus	sp.
Erythranthe guttata	Species	Mimulus guttatus
Erythranthe lutea	sp.	Mimulus luteus	sp.
Erythranthe moschata	Species	Mimulus moschatus
Erythranthe x maculosa	hyb.-sp	Mimulus x maculosus	hyb.-sp.
Erythronium dens-canis subsp. dens-canis	subsp.	Erythronium dens-canis	sp.	Autonym
Euonymus planipes	sp.	Euonymus sachalinensis	sp.
Euphorbia chamaesyce aggr.	aggr.	Euphorbia maculata aggr.	aggr.
Euphorbia chamaesyce subsp. chamaesyce	subsp.	Euphorbia chamaesyce	sp.	Autonym
Euphorbia characias aggr.	aggr.	Euphorbia characias subsp. characias	subsp.
Euphorbia epithymoides subsp. epithymoides	subsp.	Euphorbia epithymoides	sp.	Autonym
Euphorbia esula aggr.	aggr.	Euphorbia esula	sp.
Euphorbia hyberna aggr.	aggr.	Euphorbia hyberna	sp.
Euphorbia nicaeensis aggr.	aggr.	Euphorbia nicaeensis	sp.
Euphorbia seguieriana aggr.	aggr.	Euphorbia seguieriana subsp. seguieriana	subsp.
Euphorbia seguieriana var. dolomitica	Variety	Euphorbia seguieriana subsp. seguieriana
Euphorbia serpens var. serpens	var.	Euphorbia serpens	sp.	Autonym
Euphorbia subtilis	sp.	Euphorbia microcarpa	sp.	WFO (2022), POWO (2022)
Euphorbia variabilis aggr.	aggr.	Euphorbia variabilis	sp.
Euphorbia villosa aggr.	aggr.	Euphorbia epithymoides aggr.	aggr.
Euphorbia villosa subsp. villosa	subsp.	Euphorbia illirica	sp.
Euphorbia x pseudovirgata	hyb.-sp.	Euphorbia virgata	hyb.-sp.
Euphrasia alpina subsp. asturica		Euphrasia alpina
Euphrasia alpina subsp. cantabrica		Euphrasia alpina
Euphrasia minima x officinalis subsp. officinalis	nothosubsp. (formula)	Euphrasia x mixta	hyb.-sp.
Euphrasia minima x officinalis subsp. rostkoviana		Euphrasia x mixta
Euphrasia nemorosa subsp. nemorosa	subsp.	Euphrasia nemorosa	sp.	Autonym
Euphrasia nemorosa x stricta var. brevipila	nothovar. (formula)	Euphrasia x haussknechtii	hyb.-sp.	Müller et al. (2021)
Euphrasia officinalis aggr.	aggr.	Euphrasia rostkoviana aggr.	aggr.
Euphrasia officinalis subsp. officinalis	subsp.	Euphrasia rostkoviana	sp.
Euphrasia stricta subsp. stricta	subsp.	Euphrasia stricta	sp.	Autonym
Euphrasia stricta subsp. tatarica	Subspecies	Euphrasia pectinata
Euphrasia vernalis		Euphrasia x vernalis
Fagus sylvatica subsp. sylvatica	subsp.	Fagus sylvatica	sp.	Autonym
Fallopia japonica var. japonica	subsp.	Reynoutria japonica	sp.	Autonym
Fallopia x bohemica	hybr.-sp.	Reynoutria x bohemica	hybr.-sp.	???
Ferulago nodosa subsp. geniculata	subsp.	Ferulago nodosa	sp.	Euro+Med (2022)
Ferulago taurica	sp.	Ferulago campestris	sp.
Festuca arundinacea subsp. arundinacea	subsp.	Schedonorus arundinaceus subsp. arundinaceus	subsp.
Festuca beckeri subsp. arenicola		Festuca arenicola
Festuca beckeri subsp. polesica		Festuca polesica
Festuca brevipila var. brevipila	var.	Festuca stricta subsp. trachyphylla	subsp.
Festuca brevipila var. multinervis	var.	Festuca stricta subsp. trachyphylla	subsp.
Festuca halleri aggr.	aggr.	Festuca halleri aggr. s.l.	aggr. s.l.
Festuca jurana	sp.	Leucopoa pulchella subsp. jurana
Festuca pratensis aggr.	aggr.	Schedonorus pratensis aggr.	aggr.
Festuca pratensis subsp. pratensis	subsp.	Schedonorus pratensis subsp. pratensis	subsp.
Festuca pulchella aggr.	aggr.	Leucopoa pulchella	sp.
Festuca pulchella subsp. pulchella	subsp.	Leucopoa pulchella subsp. pulchella	subsp.
Festuca pulchella var. pulchella	var.	Leucopoa pulchella subsp. pulchella	subsp.
Festuca riverae	sp.	Festuca alpina subsp. riverae
Festuca rupicola subsp. rupicola	subsp.	Festuca stricta subsp. sulcata	subsp.
Festuca spectabilis aggr.	aggr.	Leucopoa spectabilis aggr.	aggr.
Filago montana		Filago minima
Filago pyramidata aggr.	aggr.	Filago germanica aggr.	aggr.
Filago vulgaris aggr.	aggr.	Filago germanica aggr.	aggr.
Filipendula palmata	sp.	Filipendula digitata	sp.
Fimbristylis dichotoma aggr.	aggr.	Fimbristylis dichotoma	sp.
Fimbristylis sieberana		Fimbristylis turkestanica
Foeniculum piperitum	sp.	Foeniculum vulgare	sp.
Foeniculum vulgare aggr.	aggr.	Foeniculum vulgare	sp.
Fragaria x hagenbachiana	hyb.-sp.	Fragaria x bifera	hyb.-sp.
Frangula alnus var. elliptica	var.	Frangula alnus subsp. alnus	subsp.	https://powo.science.kew.org/taxon/urn:lsid:ipni.org:names:889458-1
Frangula dodonei	Species	Frangula alnus	sp.
Frangula dodonei subsp. dodonei	subsp.	Frangula alnus subsp. alnus	subsp.
Fumana procumbens subsp. procumbens	subsp.	Fumana procumbens	sp.	Autonym
Fumana thymifolia var. thymifolia	var.	Fumana thymifolia	sp.	Autonym
Fumana viridis	sp.	Fumana laevis	sp.	WFO (2022)
Fumaria officinalis aggr.	aggr.	Fumaria officinalis aggr. s.l.	aggr. s.l.
Fumaria thuretii subsp. thuretii	subsp.	Fumaria petteri subsp. petteri	subsp.
Gagea bohemica aggr.	aggr.	Gagea bohemica	sp.
Gagea bohemica subsp. bohemica	subsp.	Gagea bohemica	sp.	Autonym
Gagea lutea aggr.	aggr.	Gagea lutea	sp.
Gagea nevadensis aggr.	aggr.	Gagea nevadensis	sp.
Gagea szovitzii var. callieri		Gagea szovitzii
Galeobdolon luteum aggr.	aggr.	Lamium galeobdolon	sp.
Galeopsis cebennensis	Species	Galeopsis ladanum
Galeopsis ladanum aggr.	aggr.	Galeopsis ladanum aggr. s.l.	aggr. s.l.
Galeopsis pernhofferi	sp.	Galeopsis bifida	sp.
Galeopsis pubescens + spec.	list	Galeopsis pubescens	sp.
Galeopsis pubescens subsp. murriana	subsp.	Galeopsis pubescens	sp.
Galeopsis pubescens subsp. pubescens	subsp.	Galeopsis pubescens	sp.	Autonym
Galeopsis tetrahit aggr.	aggr.	Galeopsis tetrahit aggr. s.l.	aggr. s.l.
Galeopsis tetrahit aggr.	aggr.	Galeopsis tetrahit aggr.	aggr.
Galium estebanii	Species	Galium pumilum subsp. pinetorum
Galium estebanii		Galium pumilum subsp. pinetorum
Galium mollugo aggr.	aggr.	Galium mollugo aggr. s.l.	aggr. s.l.
Galium pumilum aggr.	aggr.	Galium pussilum aggr.	aggr.
Galium pusillum aggr.	aggr.	Galium pusillum aggr. s.l.	aggr. s.l.
Galium spurium var. echinospermum	Variety	Galium spurium subsp. spurium
Galium sylvaticum aggr.	aggr.	Galium sylvaticum aggr. s.l.	aggr. s.l.
Galium verrucosum var. halophilum	Variety	Galium verrucosum
Galium verum aggr.	aggr.	Galium verum	sp.
Galium violaceum	sp.	Galium taygeteum	sp.	WFO (2022)
Galium x carmineum	Hybrid-sp.	Galium x centroniae
Genista brutia	sp.	Genista anglica	sp.
Genista pilosa prol. basiphilous		Genista pilosa	sp.
Genista pilosa subsp. jordanii	Subspecies	Genista pilosa subsp. cebennensis
Genista pilosa subsp. pilosa	subsp.	Genista sagittalis	sp.	Autonym
Genista pulchella subsp. villarsiana	Subspecies	Genista pulchella
Genista sagittalis aggr.	aggr.	Genista sagittalis	sp.
Genista sagittalis subsp. sagittalis	subsp.	Genista sagittalis	sp.	Autonym
Genista silana	sp.	Genista anglica	sp.
Genista tinctoria subsp. littoralis	subsp.	Genista tinctoria	sp.
Genista tinctoria subsp. tinctoria	subsp.	Genista tinctoria	sp.	Autonym
Gentiana bavarica var. bavarica	subsp.	Gentiana bavarica	sp.	Autonym
Gentiana bavarica var. subacaulis		Gentiana bavarica	sp.
Gentiana campestris aggr.	aggr.	Gentianella campestris	sp.
Gentiana froelichii aggr.	aggr.	Gentiana froelichii	sp.
Gentiana germanica aggr.	aggr.	Gentianella germanica aggr.	aggr.
Gentiana lutea aggr.	aggr.	Gentiana lutea	sp.
Gentiana undulatifolia	sp.	Gentiana clusii subsp. undulatifolia
Gentiana vardjanii	sp.	Gentiana lutea subsp. vardjanii
Gentiana zenariae	sp.	Gentiana froelichii subsp. zenarii
Gentianella germanica aggr.	aggr.	Gentianella germanica aggr. s.l.	aggr. s.l.
Gentianella lingulata	Species	Gentianella amarella subsp. amarella
Geranium gymnocaulon var. pumilum		Geranium gymnocaulon
Geranium molle subsp. molle	subsp.	Geranium molle	sp.	Autonym
Geranium molle var. molle	var.	Geranium molle	sp.	Autonym
Geranium phaeum aggr.	aggr.	Geranium phaeum	sp.
Geranium phaeum subsp. phaeum	subsp.	Geranium phaeum	sp.	Autonym
Geranium robertianum subsp. robertianum	subsp.	Geranium robertianum	sp.	Autonym
Geranium robertianum var. tenuissectum		Geranium robertianum
Geranium tuberosum subsp. tuberosum	subsp.	Geranium tuberosum	sp.	Autonym
Geum x thomasianum	hyb.-sp.	Geum x sudeticum	hyb.-sp.
Glyceria notata aggr.	aggr.	Glyceria fluitans aggr.	aggr.
Gnaphalium uliginosum subsp. uliginosum	subsp.	Gnaphalium uliginosum	sp.	Autonym
Grossularia uva-crispa	Species	Ribes uva-crispa
Gymnadenia conopsea aggr.	aggr.	Gymnadenia conopsea	sp.
Gymnadenia conopsea subsp. conopsea	subsp.	Gymnadenia conopsea	sp.	Autonym
Gymnadenia conopsea subsp. densiflora	subsp.	Gymnadenia conopsea	sp.
Gymnadenia densiflora	sp.	Gymnadenia conopsea
Gymnadenia nigra subsp. cenisia	subsp.	Gymnadenia rhellicani	sp.	Euro+Med (2022)
Gymnadenia nigra subsp. gabasiana	subsp.	Gymnadenia gabasiana	sp.	Euro+Med (2022)
Gymnadenia nigra subsp. rhellicani	subsp.	Gymnadenia rhellicani	sp.	Euro+Med (2022)
Gypsophila muralis subsp. muralis	subsp.	Gypsophila muralis	sp.	Autonym
Gypsophila paulii		Gypsophila perfoliata
Haloxylon aphyllum	sp.	Haloxylon ammodendron	sp.
Hedlundia atrata	sp.	Sorbus meinichii	sp.
Hedlundia faohraei	sp.	Sorbus meinichii	sp.
Hedlundia hybrida	sp.	Sorbus hybrida	sp.
Hedlundia teodori	sp.	Sorbus meinichii	sp.
Hedysarum confertum	Species	Hedysarum boveanum subsp. europaeum
Helianthemum grandiflorum subsp. grandiflorum	subsp.	Helianthemum nummularium subsp. grandiflorum	subsp.
Helianthemum grandiflorum subsp. obscurum	Subspecies	Helianthemum nummularium subsp. obscurum
Helianthemum nummularium aggr.	aggr.	Helianthemum nummularium	sp.
Helianthemum oelandicum aggr.	aggr.	Helianthemum oelandicum aggr. s.l.	aggr.
Helianthemum pilosum	Species	Helianthemum violaceum
Helianthemum urrielense		Helianthemum apenninum subsp. urrielense
Helianthus annuus var. annuus	var.	Helianthus annuus	sp.	Autonym
Helianthus annuus var. macrocarpus	Variety	Helianthus annuus
Helianthus multiflorus	sp.	Helianthus decapetalus
Helianthus pauciflorus subsp. pauciflorus	subsp.	Helianthus pauciflorus	sp.	Autonym
Helianthus tuberosus aggr.	aggr.	Helianthus tuberosus aggr. s.l.	aggr. s.l.
Helichrysum arenarium subsp. arenarium	subsp.	Helichrysum arenarium	sp.	Autonym
Helictochloa praetutiana	Species	Helictochloa versicolor subsp. praetutiana
Helictotrichon adzharicum		Helictochloa versicolor subsp. caucasica
Helictotrichon praetutianum	Species	Helictochloa versicolor subsp. praetutiana
Helictotrichon pratense aggr.	aggr.	Helictochloa pratensis aggr.	aggr.
Helictotrichon pubescens aggr.	aggr.	Avenula pubescens	sp.
Helictotrichon pubescens subsp. pubescens	subsp.	Avenula pubescens subsp. pubescens	subsp.
Helictotrichon versicolor aggr.	aggr.	Helictochloa versicolor	sp.
Heliosperma quadridentatum	sp.	Heliosperma pusillum	sp.
Helleborus macranthus	sp.	Helleborus niger subsp. macranthus
Helleborus niger aggr.	aggr.	Helleborus niger	sp.
Helleborus viridis aggr.	aggr.	Helleborus viridis	sp.
Heracleum austriacum aggr.	aggr.	Heracleum austriacum	sp.
Heracleum mantegazzianum + sosnowskyi	list	Heracleum mantegazzianum aggr.	aggr.
Heracleum sibiricum subsp. sibiricum	subsp.	Heracleum sphondylium subsp. sibiricum	subsp.
Heracleum siifolium	sp.	Heracleum austriacum subsp. siifolium
Heracleum sphondylium aggr.	aggr.	Heracleum sphondylium	sp.
Herniaria fontanesii subsp. empedocleana	Subspecies	Herniaria fontanesii subsp. fontanesii
Hesperis cupaniana	sp.	Hesperis laciniata subsp. cupaniana	subsp.
Hesperis sibirica	sp.	Hesperis matronalis	sp.	Euro+Med (2022)
Hieracilum x czeremoszense	hyb.-sp.	Hieracium czeremoszense	sp.
Hieracium alpicola subsp. alpicola	subsp.	Hieracium alpicola	sp.	Autonym
Hieracium alpinum aggr.	aggr.	Hieracium alpinum	sp.
Hieracium angustifolium aggr.	aggr.	Pilosella glacialis aggr.	aggr.
Hieracium aurantiacum aggr.	aggr.	Pilosella aurantiaca	sp.
Hieracium aurantiacum subsp. aurantiacum	subsp.	Pilosella aurantiaca subsp. aurantiaca	subsp.
Hieracium bauhinii subsp. bauhinii	subsp.	Pilosella bauhini subsp. bauhini	subsp.
Hieracium caesium aggr.	aggr.	Hieracium caesium	sp.
Hieracium caespitosum subsp. caespitosum	subsp.	Pilosella caespitosa	sp.	Autonym
Hieracium cymosum aggr.	aggr.	Pilosella cymosa aggr. s.l.	aggr. s.l.
Hieracium cymosum subsp. cymosum	subsp.	Pilosella cymosa subsp. cymosa	subsp.
Hieracium echioides aggr.	aggr.	Pilosella echioides aggr.	aggr.
Hieracium echioides subsp. echioides	subsp.	Pilosella echioides subsp. echioides	subsp.
Hieracium glaucinum aggr.	aggr.	Hieracium glaucinum	sp.
Hieracium laevigatum aggr.	aggr.	Hieracium laevigatum	sp.
Hieracium latifolium		Hieracium brevifolium subsp. brevifolium
Hieracium latifolium	Species	Hieracium brevifolium subsp. brevifolium
Hieracium latifolium	Species	Hieracium brevifolium subsp. brevifolium
Hieracium latifolium	Species	Hieracium brevifolium subsp. brevifolium
Hieracium murorum aggr.	aggr.	Hieracium murorum aggr. s.l.	aggr. s.l.
Hieracium peletierianum	sp.	Pilosella peleteriana
Hieracium pilosella aggr.	aggr.	Pilosella officinarum aggr.	aggr.
Hieracium piloselloides aggr.	aggr.	Pilosella piloselloides aggr.	aggr.
Hieracium racemosum aggr.	aggr.	Hieracium racemosum	sp.
Hieracium sabaudum aggr.	aggr.	Hieracium sabaudum	sp.
Hieracium sect. Alpestria	sect.	Hieracium dovrense aggr.	aggr.
Hieracium sect. Alpina	sect.	Hieracium alpinum	sp.
Hieracium sect. Bifida	sect.	Hieracium bifidum aggr.	aggr.
Hieracium sect. Foliosa	sect.	Hieracium crocatum aggr.	aggr.
Hieracium sect. Hieracium	sect.	Hieracium murorum aggr.	aggr.
Hieracium sect. Oreadea	sect.	Hieracium schmidtii aggr.	aggr.
Hieracium sect. Prenanthoidea	sect.	Hieracium prenanthoides aggr.	aggr.
Hieracium sect. Pulmonarioidea	sect.	Hieracium depilatum	sp.
Hieracium sect. Sabauda	sect.	Hieracium sabaudum	sp.
Hieracium sect. Subalpina	sect.	Hieracium nigrescens	sp.
Hieracium sect. Tridentata	sect.	Hieracium laevigatum	sp.
Hieracium sect. Vulgata	sect.	Hieracium lachenalii aggr.	aggr.
Hieracium umbellatum aggr.	aggr.	Hieracium umbellatum	sp.
Hieracium x buianum	hyb.-sp.	Hieraciurn buianum	sp.
Hieracium x duplex	hyb.-sp.	Pilosella prussica	sp.
Hieracium x koernickeanum	hyb.-sp.	Pilosella koernickeana	sp.
Hieracium x nyaradyanum	hyb.-sp.	Hieracium nyaradyanum	sp.
Hieracium x nyaradyanum	hyb.-sp.	Hieracium nyaradyanum	sp.
Hieracium x pseudoeffusum	hyb.-sp.	Pilosella piloselloides subsp. piloselloides	sp.
Hieracium x pseudoratezatense	hyb.-sp.	Hieracium pseudoratezatense	sp.
Hieracium x sculthesii	hyb.-sp.	Pilosella schultesii	sp.
Hieracium x stoloniflorum	hyb.-sp.	Pilosella stoloniflora	sp.
Hippocrepis emerus aggr.	aggr.	Hippocrepis emerus	sp.
Hippophaë carpatica	sp.	Hippophaë rhamnoides subsp. carpatica
Hippophae rhamnoides aggr.	aggr.	Hippophae rhamnoides	sp.
Holoschoenus romanus subsp. holoschoenus	Subspecies	Scirpoides holoschoenus
Holosteum hirsutum	sp.	Holosteum umbellatum subsp. hirsutum
Holosteum umbellatum aggr.	aggr.	Holosteum umbellatum	sp.
Holosteum umbellatum var. parceglandulosum	var.	Holosteum umbellatum subsp. umbellatum	subsp.
Hordeum jubatum subsp. jubatum	subsp.	Hordeum jubatum	sp.	Autonym
Hordeum murinum aggr.	aggr.	Hordeum murinum	sp.
Hordeum vulgare aggr.	aggr.	Hordeum vulgare	sp.
Hordeum zeocriton	Species	Hordeum vulgare subsp. distichon
Hosta longipes	sp.	Hosta sieboldiana
Hylotelephium telephium subsp. telephium	subsp.	Hylotelephium telephium	sp.
Hylotelephium triphyllum	Species	Hylotelephium telephium
Hylotelephium triphyllum	Species	Hylotelephium telephium
Hylotelephium triphyllum	Species	Hylotelephium telephium
Hymenolobus procumbens aggr.	aggr.	Hornungia procumbens aggr.	aggr.
Hypecoum ponticum		Hypecoum procumbens subsp. procumbens
Hypericum calabricum	sp.	Hypericum barbatum	sp.
Hypericum empetrifolium subsp. empetrifolium	subsp.	Hypericum empetrifolium	sp.	Autonym
Hypericum empetrifolium subsp. oliganthum	subsp.	Hypericum empetrifolium	sp.
Hypericum empetrifolium subsp. tortuosum	subsp.	Hypericum empetrifolium	sp.
Hypericum perforatum aggr.	aggr.	Hypericum perforatum aggr. s.l.	aggr. s.l.
Hypericum richeri aggr.	aggr.	Hypericum richeri	sp.
Hypochaeris uniflora aggr.	aggr.	Hypochaeris uniflora	aggr.
Hyssopus officinalis aggr.	aggr.	Hyssopus officinalis	sp.
Hyssopus pilifer	sp.	Hyssopus officinalis subsp. aristatus
Iberis aurosica aggr.	aggr.	Iberis aurosica	sp.
Iberis violacea	Species	Iberis carnosa
Iris aphylla subsp. aphylla	subsp.	Iris aphylla	sp.	Autonym
Iris florentina	sp.	Iris x germanica	hyb.-sp.	WFO (2022)
Iris squalens	sp.	Iris x germanica	hyb.-sp.
Iris x sambucina	hyb.-sp.	Iris x germanica	hyb.-sp.	WFO (2022)
Isatis apennina	Species	Isatis allionii
Isatis taurica		Isatis tinctoria
Isoetes duriei	Species	Isoetes durieui
Isoetes velata subsp. velata	subsp.	Isoetes longissima subsp. longissima	subsp.
Jacobaea incana aggr.	aggr.	Jacobaea incana aggr. s.l.	aggr. s.l.
Jacobaea incana subsp. incana	subsp.	Jacobaea incana	sp.	Autonym
Jacobaea vulgaris aggr.	aggr.	Jacobaea erucifolia aggr.	aggr.
Jovibarba globifera aggr.	aggr.	Jovibarba globifera	sp.
Jovibarba hirta aggr.	aggr.	Jovibarba globifera	sp.
Jovibarba pseudohirta	sp.	Jovibarba globifera subsp. pseudohirta
Juncus alpinus subsp. alpinus	subsp.	Juncus alpinoarticulatus subsp. alpinoarticulatus	subsp.
Juncus articulatus aggr.	aggr.	Juncus articulatus aggr. s.l.	aggr. s.l.
Juncus bulbosus subsp. bulbosus	subsp.	Juncus bulbosus	sp.	Autonym
Juncus tenuis subsp. tenuis	subsp.	Juncus tenuis	sp.	Autonym
Juncus trifidus subsp. trifidus	subsp.	Juncus trifidus	sp.	Autonym
Juniperus communis aggr.	aggr.	Juniperus communis	sp.
Juniperus turkestanica	sp.	Juniperus pseudosabina	sp.
Kali soda	Species	Salsola kali
Kali turgidum	sp.	Salsola kali	sp.
Kali turgidum	Species	Salsola kali
Kalmia procumbens	sp.	Loiseleuria procumbens	sp.
Kalmia procumbens	Species	Loiseleuria procumbens
Kalopanax ricinifolius	sp.	Kalopanax septemlobus subsp. septemlobus	subsp.
Karpatiosorbus latifolia	sp.	Sorbus latifolia	sp.
Knautia arvensis aggr.	aggr.	Knautia arvensis aggr. s.l.	aggr.
Knautia basaltica var. basaltica	subsp.	Knautia basaltica	sp.	Autonym
Knautia budensis	sp.	Knautia arvensis subsp. pannonica
Knautia drymeia aggr.	aggr.	Knautia drymeia	sp.
Kobresia capilliformis		Kobresia macrolepis
Kobresia persica		Kobresia humilis
Laburnum alschingeri	sp.	Laburnum anagyroides
Lactuca quercina aggr.	aggr.	Lactuca quercina	sp.
Lactuca viminea aggr.	aggr.	Lactuca viminea	sp.
Lactuca virosa x quercina	hyb.-sp. (formula)	Lactuca quercina x virosa	hyb.-sp. (formula)	Julve (2022)
Lamiastrum galeobdolon cv. 'Florentinum'	cv.	Lamium galeobdolon subsp. argentatum	subsp.	Wisskirchen & Haeupler (1998)
Lamiastrum galeobdolon subsp. galeobdolon	subsp.	Lamium galeobdolon	sp.
Lamiastrum galeobdolon subsp. galeobdolon	subsp.	Lamum galeobdolon subsp. galeobdolon	subsp.
Lamiastrum galeobdolon subsp. montanum	subsp.	Lamium galeobdolon subsp. montanum	subsp.
Lamium galeobdolon aggr.	aggr.	Lamium galeobdolon	sp.
Lamium hybridum aggr.	aggr.	Lamium hybridum	sp.
Lamium maculatum subsp. maculatum	subsp.	Lamium maculatum	sp.	Autonym
Lapsana communis aggr.	aggr.	Lapsana communis	sp.
Larix cajanderi	sp.	Larix gmelinii	sp.
Laserpitium alpinum		Laserpitium krapffii subsp. krapffii
Laserpitium alpinum	sp.	Laserpitium krapfii	sp.
Laserpitium krapfii aggr.	aggr.	Laserpitium krapfii	sp.
Laserpitium nestleri subsp. eliasii		Laserpitium eliasii
Lathraea squamaria aggr.	aggr.	Lathraea squamaria	sp.
Lathraea tatrica	sp.	Lathraea squamaria subsp. tatrica
Lathyrus collinus	sp.	Lathyrus pannonicus subsp. collinus
Lathyrus gracilis	sp.	Lathyrus vernus		due to http://www.worldfloraonline.org/taxon/wfo-0001054824 synonym to L. vernus (L.) Brnh.; but the EIVs differ!!
Lathyrus latifolius subsp. heterophyllus	subsp.	Lathyrus heterophyllus	sp.
Lathyrus laxiflorus subsp. laxiflorus	subsp.	Lathyrus laxiflorus	sp.	Autonym
Lathyrus lusseri	sp.	Lathyrus pratensis		due to http://www.worldfloraonline.org/taxon/wfo-0001365907 synonym to L. pratensis (not accepted as subsp.!) but the EIVs differ!!
Lathyrus luteus		Lathyrus linifolius
Lathyrus nissolia subsp. nissolia	subsp.	Lathyrus nissolia	sp.	Autonym
Lathyrus nissolia subsp. pubescens	Subspecies	Lathyrus nissolia
Lathyrus nissolia var. glabrescens	Variety	Lathyrus nissolia
Lathyrus nissolia var. nissolia	var.	Lathyrus nissolia	sp.	Autonym
Lathyrus ochraceus aggr.	aggr.	Lathyrus laevigatus subsp. occidentalis	subsp.
Lathyrus ochraceus subsp. occidentalis	Subspecies	Lathyrus laevigatus subsp. occidentalis
Lathyrus pannonicus aggr.	aggr.	Lathyrus pannonicus	sp.
Lathyrus pratensis aggr.	aggr.	Lathyrus pratensis	sp.
Lathyrus sylvestris subsp. angustifolius	subsp.	Lathyrus sylvestris	sp.
Lathyrus sylvestris subsp. platyphyllos	subsp.	Lathyrus sylvestris	sp.
Lathyrus sylvestris subsp. pyrenaicus	Subspecies	Lathyrus sylvestris
Lathyrus sylvestris subsp. sylvestris	subsp.	Lathyrus sylvestris	sp.	Autonym
Lathyrus velutinus	sp.	Lathyrus pratensis		due to http://www.worldfloraonline.org/taxon/wfo-0000749671 synonym to L. pratensis, but the EIVs differ!
Lathyrus vernus aggr.	aggr.	Lathyrus vernus	sp.
Lavatera thuringiaca subsp. thuringiaca	subsp.	Malva thuringiaca subsp. thuringiaca	subsp.
Lemna perpusilla	Species	Lemna aequinoctialis
Leontodon autumnalis aggr.	aggr.	Scorzoneroides autumnalis	sp.
Leontodon autumnalis subsp. autumnalis	subsp.	Scorzoneroides autumnalis subsp. autumnalis	subsp.
Leontodon croceus subsp. croceus	subsp.	Scorzoneroides crocea	sp.	Autonym
Leontodon hispidus subsp. hispidus var. hispidus	subsp.	Leontodon hispidus subsp. hispidus	subsp.
Leontodon montanus aggr.	aggr.	Scorzoneroides montana aggr.	aggr.
Leontodon pseudocrispus	sp.	Leontodon hyoseroides subsp. pseudocrispus
Leontodon pyrenaicus aggr.	aggr.	Scorzoneroides pyrenaica aggr. s.l.	aggr. s.l.
Leontodon taraxacoides subsp. taraxacoides	subsp.	Leontodon saxatilis subsp. rothii	subsp.
Leontopodium ochroleucum	sp.	Leontopodium leontopodinum	sp.
Leonurus cardiaca subsp. cardiaca	subsp.	Leonurus cardiaca	sp.	Autonym
Lepidium crassifolium		Lepidium cartilagineum
Lepidium crassifolium	sp.	Lepidium cartilagineum	sp.	WFO (2022)
Lepidium crassifolium	Species	Lepidium cartilagineum
Lepidium crassifolium		Lepidium cartilagineum
Leucanthemopsis alpina aggr.	aggr.	Leucanthemopsis alpina	sp.
Leucanthemum discoideum	sp.	Leucanthemum pallens
Leucanthemum vulgare aggr.	aggr.	Leucanthemum vulgare aggr.	aggr.
Leucojum nicaeense aggr.	aggr.	Acis nicaeensis aggr.	aggr.
Libanotis sibirica	Species	Seseli libanotis
Ligularia bucoviensis	sp.	Ligularia sibirica	sp.
Ligularia glauca		Ligularia carpathica
Lilium bulbiferum aggr.	aggr.	Lilium bulbiferum	sp.
Lilium bulbiferum var. bulbiferum	var.	Lilium bulbiferum subsp. bulbiferum	subsp.
Lilium bulbiferum var. croceum	var.	Lilium bulbiferum subsp.. croceum	subsp.	https://europlusmed.org/cdm_dataportal/taxon/4d545253-8fb7-41db-8f25-0f2e119bd2b1
Limonium binervosum subsp. binervosum	subsp.	Limonium binervosum	sp.	Autonym
Limonium binervosum subsp. sarniense	Subspecies	Limonium binervosum
Limonium sinuatum subsp. sinuatum	subsp.	Limonium sinuatum	sp.	Autonym
Limonium tommasinii	Species	Limonium densissimum
Limonium vulgare subsp. vulgare	subsp.	Limonium vulgare	sp.	Autonym
Linaria alpina aggr.	aggr.	Linaria alpina	sp.
Linaria alpina subsp. filicaulis		Linaria filicaulis
Linaria dalmatica subsp. transilvanica		Linaria genistifolia subsp. dalmatica
Linaria genistifolia aggr.	aggr.	Linaria genistifolia	sp.
Linaria saxatilis subsp. glabrescens		Linaria saxatilis
Linaria supina subsp. maritima		Linaria supina subsp. supina		POWO (2022)
Lindernia palustris	Species	Lindernia procumbens
Lindernia palustris	Species	Lindernia procumbens
Linum catharticum aggr.	aggr.	Linum catharticum	sp.
Linum catharticum var. subalpinum	Variety	Linum catharticum
Linum usitatissimum subsp. usitatissimum	subsp.	Linum usitatissimum	sp.	Autonym
Liparis loeselii var. loeselii	var.	Liparis loeselii subsp. loeselii	subsp.
Lithospermum arvense subsp. arvense	subsp.	Buglossoides arvensis subsp. arvense	subsp.
Lolium x hybridum	hyb.-sp.	Lolium x boucheanum	hyb.-sp.
Lomelosia dallaportae	Species	Lomelosia crenata subsp. dallaportae
Lomelosia pseudisetensis	Species	Lomelosia crenata subsp. pseudisetensis
Loncomelos narbonensis	Species	Ornithogalum narbonense
Loncomelos pyrenaicum subsp. pyrenaicum	subsp.	Ornithogalum pyrenaicum	sp.	Autonym
Lonicera alpigena subsp. alpigena	subsp.	Lonicera alpigena	sp.	Autonym
Lonicera caerulea aggr.	aggr.	Lonicera caerulea	sp.
Lonicera edulis	Species	Lonicera caerulea subsp. caerulea
Lotus corniculatus aggr.	aggr.	Lotus corniculatus aggr. s.l.	aggr. s.l.
Lotus corniculatus subsp. alpestris	Subspecies	Lotus corniculatus
Lotus corniculatus subsp. delortii	Subspecies	Lotus delortii
Lotus corniculatus subsp. hirsutus	Subspecies	Lotus corniculatus
Lotus corniculatus subsp. valdepilosus	Subspecies	Lotus corniculatus
Lotus corniculatus var. corniculatus	var.	Lotus corniculatus subsp. corniculatus	subsp.
Lotus maritimus var. hirsutus	Variety	Lotus maritimus
Lotus maritimus var. maritimus	var.	Lotus maritimus	sp.	Autonym
Lotus purpureus	sp.	Lotus tetragonolobus
Lotus valdepilosus	sp.	Lotus corniculatus
Lunaria annua aggr.	aggr.	Lunaria annua	sp.
Lupinus angustifolius aggr.	aggr.	Lupinus angustifolius	sp.
Lupinus gussoneanus	Species	Lupinus micranthus
Luzula alpinopilosa aggr.	aggr.	Luzula alpinopilosa aggr. s.l.	aggr. s.l.
Luzula candollei	sp.	Luzula alpinopilosa subsp. alpinopilosa
Luzula multiflora aggr.	aggr.	Luzula campestris aggr.	aggr.
Luzula mutabilis	sp.	Luzula spicata subsp. conglomerata
Luzula rubella	sp.	Luzula luzuloides subsp. rubella
Luzula sylvatica aggr.	aggr.	Luzula sylvatica	sp.
Lychnis flos-cuculi subsp. flos-cuculi	subsp.	Silene flos-cuculi	sp.	Autonym
Lycopodium annotinum aggr.	aggr.	Lycopodium annotinum	sp.
Lycopodium clavatum aggr.	aggr.	Lycopodium clavatum	sp.
Lycopodium clavatum subsp. clavatum	subsp.	Lycopodium clavatum	sp.	Autonym
Lycopsis arvensis subsp. arvensis	subsp.	Lycopsis arvensis	sp.	Autonym
Lycopus europaeus aggr.	aggr.	Lycopus europaeus	sp.
Lycopus europaeus subsp. europaeus	subsp.	Lycopus europaeus	sp.	Autonym
Lysimachia arvensis	sp.	Anagallis arvensis	sp.
Lysimachia arvensis	Species	Anagallis arvensis
Lysimachia europaea	sp.	Trientalis europaea	sp.
Lysimachia europaea	Species	Trientalis europaea
Lysimachia maritima	sp.	Glaux maritima	sp.
Lysimachia minima	Species	Anagallis minima
Lysimachia minima	sp.	Centunculus minimus	sp.
Lysimachia tyrrhenia	Species	Anagallis crassifolia
Macrotomia echioides		Nonea echioides
Malcolmia karelinii	sp.	Strigosella brevipes	sp.
Malus pallasiana	Species	Malus baccata
Malus x prunifolia	hyb.-sp.	Malus prunifolia	sp.	https://powo.science.kew.org/taxon/urn:lsid:ipni.org:names:726369-1
Malva alcea subsp. alcea	subsp.	Malva alcea var. alcea	var.
Malva sylvestris subsp. sylvestris	subsp.	Malva sylvestris	sp.	Autonym
Malva sylvestris var. sylvestris	var.	Malva sylvestris	sp.	Autonym
Malva verticillata var. verticillata	var.	Malva verticillata	sp.	Autonym
Matricaria ambigua	sp.	Tripleurospermum ambiguum	sp.
Matricaria lamellata	sp.	Microcephala lamellata	sp.
Matthiola fruticulosa aggr.	aggr.	Matthiola fruticulosa	sp.
Mazus pumilio	Species	Mazus japonicus
Medicago hemicycla		Medicago ×varia
Medicago lupulina var. willdenowiana	Variety	Medicago lupulina
Medicago orbicularis var. orbicularis	var.	Medicago orbicularis	sp.	Autonym
Medicago sativa subsp. x varia	hyb.-sp.	Medicago x varia	hyb.-sp.
Melampyrum arvense subsp. arvense	subsp.	Melampyrum arvense	sp.	Autonym
Melampyrum cristatum subsp. cristatum	subsp.	Melampyrum cristatum	sp.	Autonym
Melampyrum cristatum var. cristatum	var.	Melampyrum cristatum	sp.	Autonym
Melampyrum nemorosum var. praecox	Variety	Melampyrum nemorosum
Melampyrum pratense subsp. pratense	subsp.	Melampyrum pratense	sp.	Autonym
Melampyrum sylvaticum subsp. sylvaticum	subsp.	Melampyrum sylvaticum	sp.	Autonym
Melilotus altissimus subsp. macrorhizus	Subspecies	Melilotus altissimus
Mentha arvensis + verticillata	list	Mentha spicata aggr. s.l.	aggr. s.l.
Mentha piperita aggr.	aggr.	Mentha x piperita aggr.	aggr.
Mentha pulegium subsp. pulegium	subsp.	Mentha pulegium	sp.	Autonym
Mentha spicata aggr.	aggr.	Mentha spicata aggr. s.l.	aggr. s.l.
Mentha verticillata aggr.	aggr.	Mentha x verticillata aggr.	aggr.
Mentha x gentilis	hyb.-sp.	Mentha x gracilis	hyb.-sp.	Müller et al. (2021)
Mentha x piperita subsp. nepetoides	nothosubsp.	Mentha x dumetorum	hyb.-sp.
Mercurialis longistipes	Species	Mercurialis x paixii	hyb.-sp.
Meum athamanticum subsp. athamanticum	subsp.	Meum athamanticum	sp.	Autonym
Micranthes foliolosa	sp.	Saxifraga foliolosa	sp.
Micranthes nivalis	sp.	Saxifraga nivalis	sp.
Micranthes nivalis	Species	Saxifraga stellaris
Micranthes stellaris	sp.	Saxifraga stellaris	sp.
Micranthes tenuis	sp.	Saxifraga tenuis	sp.
Micromeria consentina	Species	Micromeria graeca subsp. consentina
Micropus erectus aggr.	aggr.	Bombycilaena erecta aggr.	aggr.
Milium effusum aggr.	aggr.	Milium effusum	sp.
Minuartia hirsuta subsp. cataractarum		Minuartia hirsuta subsp. frutescens
Minuartia laricifolia	sp.	Cherleria laricifolia	sp.
Minuartia laricifolia aggr.	aggr.	Cherleria laricifolia aggr.	aggr.
Minuartia rupestris aggr.	aggr.	Minuartia rupestris	sp.
Minuartia vaillantiana	sp.	Minuartia hybrida subsp. vaillantiana
Molinia caerulea subsp. euxina		Molinia caerulea
Molinia pocsii	sp.	Molinia arundinacea
Monotropa hypopitys aggr.	aggr.	Hypopitys monotropa aggr.	aggr.
Monotropa hypopitys subsp. hypopitys	subsp.	Hypopitys monotropa	sp.
Montia variabilis	sp.	Montia fontana subsp. fontana
Muhlenbergia vaginiflora	sp.	Sporobolus vaginiflorus
Muscari comosum aggr.	aggr.	Leopoldia comosa aggr.	aggr.
Muscari racemosum subsp. racemosum	subsp.	Muscari racemosum	sp.	Autonym
Myosotis cespitosa	sp.	Myosotis laxa subsp. cespitosa
Myosotis corsicana subsp. corsicana	subsp.	Myosotis corsicana	sp.	Autonym
Myosotis palustris subsp. palustris	subsp.	Myosotis scorpioides subsp. scorpioides	subsp.
Myosotis scorpioides aggr.	aggr.	Myosotis palustris aggr.	aggr.
Myosotis sylvatica aggr.	aggr.	Myosotis sylvatica aggr. s.l.	aggr. s.l.
Myrica tomentosa	Species	Myrica gale
Najas marina aggr.	aggr.	Najas marina	sp.
Nasturtium officinale aggr.	aggr.	Nasturtium officinale	aggr.
Nasturtium officinale subsp. officinale	subsp.	Nasturtium officinale	sp.	Autonym
Nectaroscordum siculum subsp. siculum	subsp.	Allium siculum subsp. siculum	subsp.
Neslia paniculata aggr.	aggr.	Neslia paniculata	sp.
Nigritella bourneriasii	sp.	Gymnadenia corneliana
Nigritella gallica	sp.	Gymnadenia austriaca var. gallica
Nigritella miniata aggr.	aggr.	Gymnadenia nigra	sp.
Nigritella minor	sp.	Gymnadenia nigra
Nigritella nigra aggr.	aggr.	Gymnadenia nigra aggr.	aggr.
Nigritella rhellicani aggr.	aggr.	Gymnadenia nigra aggr.	aggr.
Noccaea caerulescens subsp. calaminaris	Subspecies	Noccaea caerulescens
Noccaea cochleariformis	Species	Noccaea thlaspidioides
Nonea erecta	Species	Nonea pulla
Nonea erecta	sp.	Nonea pulla
Notholaena marantae subsp. marantae	subsp.	Paragymnopteris marantae	sp.
Nymphaea alba subsp. alba	subsp.	Nymphaea alba	sp.	Autonym
Nymphaea lotus var. thermalis		Nymphaea lotus
Oberna procumbens	Species	Silene procumbens
Odontites asturicus		Odontites viscosus		WFO (2022)
Odontites provincialis	sp.	Odontites lanceolatus subsp. provincialis	subsp.	http://www.worldfloraonline.org/taxon/wfo-0000388609
Odontites ruber aggr.	aggr.	Odontites rubra aggr.	aggr.
Odontites vernus aggr.	aggr.	Odontites rubra aggr.	aggr.
Odontites vernus subsp. vernus	subsp.	Odontites vernus	sp.	Autonym
Odontites viscosus subsp. alpestris	Subspecies	Odontites viscosus subsp. viscosus
Oenanthe silaifolia subsp. silaifolia	subsp.	Oenanthe silaifolia	sp.	Autonym
Oenothera ammophila var. ammophila	var.	Oenothera ammophila	sp.	Autonym
Oenothera ammophila var. germanica	var.	Oenothera ammophila	sp.
Oenothera biennis aggr.	aggr.	Oenothera biennis aggr. s.l.	aggr. s.l.
Oenothera biennis var. biennis	var.	Oenothera biennis	sp.	Autonym
Oenothera biennis var. leptomeres	var.	Oenothera biennis	sp.
Oenothera biennis var. sulphurea	var.	Oenothera biennis	sp.
Oloptum miliaceum	Species	Piptatherum miliaceum
Onobrychis montana subsp. transsilvanica	sub	Onobrychis montana subsp. montana	subsp.
Onobrychis taurerica	sp.	Onobrychis arenaria subsp. taurerica
Ononis hispanica subsp. hispanica	subsp.	Ononis natrix subsp. hispanica	subsp.
Ononis hispanica subsp. ramosissima	Subspecies	Ononis natrix subsp. ramosissima
Ononis mollis	Species	Ononis reclinata		Pignatti S., Guarino, R., La Rosa M. (2017-2019) Flora d'Italia, 2nd edition. Edagricole, Edizioni Agricole di New Business Media, Bologna.
Ononis repens subsp. procurrens	Subspecies	Ononis spinosa subsp. procurrens
Ononis repens subsp. repens	subsp.	Ononis spinosa subsp. procurrens	subsp.
Ononis spinosa aggr.	aggr.	Ononis spinosa	sp.
Ononis spinosa subsp. aberrans	subsp.	Ononis spinosa subsp. spinosa	sp.	Müller et al. (2021)
Ononis spinosa subsp. diacantha	Subspecies	Ononis spinosa subsp. antiquorum
Onopordum x dumoulinii	hyb.-sp.	Onopordum illyricum	sp.
Onosma arenaria subsp. arenaria	subsp.	Onosma arenaria	sp.	Autonym
Ophrys apifera aggr.	aggr.	Ophrys apifera	sp.
Ophrys apifera subsp. apifera	subsp.	Ophrys apifera	sp.	Autonym
Ophrys aurelia	sp.	Ophrys flavicans	sp.
Ophrys benacensis	sp.	Ophrys bertolonii	sp.	Euro+Med (2022)
Ophrys bertolonii subsp. bertolonii	subsp.	Ophrys bertolonii	sp.	Autonym
Ophrys catalaunica	sp.	Ophrys flavicans	sp.	WFO (2022)
Ophrys cretica subsp. cretica	subsp.	Ophrys kotschyi subsp. cretica	subsp.
Ophrys drumana	sp.	Ophrys flavicans	sp.
Ophrys holoserica subsp. holubyana	Subspecies	Ophrys holoserica
Ophrys massiliensis	sp.	Ophrys x arachnitiformis	hyb.-sp.
Ophrys morisii	sp.	Ophrys x arachnitiformis	hyb.-sp.	WFO (2022)
Ophrys occidentalis	sp.	Ophrys x arachnitiformis	hyb.-sp.	WFO (2022)
Ophrys philippei	sp.	Ophrys oestrifera subsp. philippei	subsp.	WFO (2022)
Ophrys pseudoscolopax	sp.	Ophrys x minuticauda nothosubsp. minuticauda	nothosubsp.	WFO (2022)
Ophrys saratoi	sp.	Ophrys flavicans	sp.	WFO (2022)
Ophrys saratoi	sp.	Ophrys flavicans	sp.
Ophrys sitiaca	Species	Ophrys scolopax subsp. heldreichii
Ophrys splendida	sp.	Ophrys x arachnitiformis	hyb.-sp.
Ophrys taurica aggr.	aggr.	Ophrys sphegodes	sp.
Ophrys virescens	Species	Ophrys sphegodes subsp. litigiosa
Orchis aestivalis	sp.	Neotinea ustulata var. aestivalis
Orchis anatolica subsp. anatolica	subsp.	Orchis anatolica	sp.	Autonym
Orchis coriophora aggr.	aggr.	Anacamptis coriophora	sp.
Orchis coriophora subsp. coriophora	subsp.	Anacamptis coriophora	sp.
Orchis elegans + palustris	list	Anacamptis palustris	sp.
Orchis langei x mascula	hyb.-sp.	Orchis mascula	sp.
Orchis laxiflora aggr.	aggr.	Anacamptis laxiflora aggr.	aggr.
Orchis morio aggr.	aggr.	Anacamptis morio	sp.
Orchis morio subsp. morio	subsp.	Anacamptis morio subsp. morio	subsp.
Orchis palustris var. palustris	var.	Anacamptis palustris subsp. palustris	subsp.
Orchis tridentata aggr.	aggr.	Neotinea tridentata aggr.	aggr.
Orchis tridentata subsp. tridentata	subsp.	Neotinea tridentata subsp. tridentata	subsp.
Orchis ustulata aggr.	aggr.	Neotinea ustulata	sp.
Orchis ustulata var. ustulata	var.	Neotinea ustulata var. ustulata	var.
Oreochloa seslerioides subsp. confusa		Oreochloa confusa
Oreochloa seslerioides subsp. sesleroides	Subspecies	Oreochloa seslerioides
Origanum prismaticum	sp.	Origanum vulgare subsp. vulgare
Origanum vulgare aggr.	aggr.	Origanum vulgare	sp.
Ornithogalum dictaeum subsp. dictaeum	subsp.	Ornithogalum dictaeum	sp.
Ornithogalum umbellatum aggr.	aggr.	Ornithogalum umbellatum aggr. s.l.	aggr. s.l.
Ornithogalum umbellatum subsp. umbellatum	subsp.	Ornithogalum umbellatum	sp.	Autonym
Orobanche alba subsp. alba	subsp.	Orobanche alba	sp.	Autonym
Orobanche alsatica aggr.	aggr.	Orobanche alsatica	sp.
Orobanche alsatica subsp. alsatica	subsp.	Orobanche alsatica	sp.	Autonym
Orobanche coerulescens subsp. occidentalis		Orobanche coerulescens
Orobanche laevis		Phelipanche arenaria
Orobanche lucorum aggr.	aggr.	Orobanche lucorum aggr. s.l.	aggr. s.l.
Orobanche major		Orobanche elatior
Orobanche major		Orobanche elatior
Orobanche purpurea aggr.	aggr.	Phelipanche purpurea aggr.	aggr.
Orobanche purpurea var. bohemica	var.	Phelipanche purpurea	sp.
Orobanche purpurea var. purpurea	var.	Phelipanche purpurea	sp.
Orobanche ramosa aggr.	aggr.	Phelipanche ramosa aggr.	aggr.
Orobanche rapum-genistae aggr.	aggr.	Orobanche rapum-genistae	sp.
Orobanche reticulata aggr.	aggr.	Orobanche reticulata	sp.
Orobanche reticulata subsp. reticulata	subsp.	Orobanche reticulata	sp.	Autonym
Otites artemisetorum	sp.	Silene chersonensis	sp.	https://powo.science.kew.org/taxon/urn:lsid:ipni.org:names:155867-1
Otites cuneifolius	sp.	Silene otites subsp. otites	subsp.	POWO (2022)
Otites eugeniae	sp.	Silene donetzica	sp.
Otites krymensis	sp.	Silene hellmannii	sp.	WFO (2022)
Otites orae-syvashicae		Silene wolgensis
Oxalis corniculata var. corniculata	subsp.	Oxalis corniculata	sp.	Autonym
Oxybasis rubra var. intermedia	Variety	Oxybasis rubra
Oxybasis rubra var. rubra	var.	Oxybasis rubra	sp.	Autonym
Oxytropis campestris aggr.	aggr.	Oxytropis campestris	sp.
Oxytropis carinthiaca	sp.	Oxytropis lapponica
Oxytropis halleri aggr.	aggr.	Oxytropis halleri	sp.
Oxytropis jacquinii aggr.	aggr.	Oxytropis montana aggr.	aggr.
Oxytropis montana	Species	Oxytropis jacquinii
Oxytropis montana	Species	Oxytropis jacquinii
Oxytropis pilosa subsp. hungarica	subsp.	Oxytropis pilosa	sp.
Pachypleurum mutellinoides subsp. mutellinoides	subsp.	Ligusticum mutellinoides	sp.	Autonym
Padus avium subsp. avium	subsp.	Prunus padus subsp. padus	subsp.
Padus maackii	sp.	Prunus glandulifolia	sp.
Paeonia huthii	sp.	Paeonia officinalis subsp. huthii
Paeonia officinalis aggr.	aggr.	Paeonia officinalis	sp.
Panicum miliaceum aggr.	aggr.	Panicum miliaceum	sp.
Panicum repentellum	Species	Panicum hygrocharis
Papaver alpinum aggr.	aggr.	Papaver alpinum aggr.	aggr.
Papaver alpinum subsp. alpinum	subsp.	Papaver alpinum	sp.	Autonym
Papaver argemone subsp. argemone	subsp.	Papaver argemone	sp.	Autonym
Papaver burseri		Papaver alpinum
Papaver dubium subsp. albiflorum		Papaver dubium subsp. austromoravicum
Papaver maculosum	Species	Papaver dubium subsp. austromoravicum
Papaver maculosum	sp.	Papaver dubium subsp. austromoravicum
Papaver rhoeas aggr.	aggr.	Papaver rhoeas aggr. s.l.	aggr. s.l.
Parnassia palustris subsp. palustris	subsp.	Parnassia palustris	sp.	Autonym
Paronychia galloprovincialis	sp.	Paronychia kapela subsp. galloprovincialis
Paronychia kapela aggr.	aggr.	Paronychia kapela	sp.
Pastinaca graveolens		Malabaila graveolens
Pastinaca graveolens	Species	Malabaila graveolens
Pastinaca pratensis	sp.	Pastinaca sativa subsp. sativa
Pastinaca sativa aggr.	aggr.	Pastinaca sativa	sp.
Pastinaca sativa subsp. sativa var. sativa	subsp.	Pastinaca sativa subsp. sativa	subsp.
Pedicularis helvetica	sp.	Pedicularis rostratospicata subsp. helvetica
Pedicularis pyrenaica var. failax		Pedicularis pyrenaica
Pedicularis rosea aggr.	aggr.	Pedicularis rosea	sp.
Pedicularis rostratospicata aggr.	aggr.	Pedicularis rostratospicata	sp.
Pedicularis tuberosa aggr.	aggr.	Pedicularis tuberosa aggr. s.l.	aggr. s.l.
Persicaria amphibia var. terrestris		Persicaria amphibia	sp.
Persicaria x lenticularis	hyb.-sp.	Persicaria x pseudolapathum	hyb.-sp.	https://powo.science.kew.org/taxon/urn:lsid:ipni.org:names:695038-1
Peucedanum carvifolia aggr.	aggr.	Dichoropetalum carvifolia aggr.	aggr.
Peucedanum lubimenkoanum		Peucedanum alsaticum
Phalaris arundinacea subsp. arundinacea	subsp.	Phalaroides arundinacea subsp. arundinacea	subsp.
Phedimus aizoon	sp.	Sedum aizoon	sp.
Phedimus hybridus	sp.	Sedum hybridum	sp.
Phedimus kamtschaticus	sp.	Sedum kamtschaticum	sp.
Phedimus spurius	sp.	Sedum spurium	sp.
Phedimus spurius	Species	Sedum spurium
Phedimus spurius	Species	Sedum spurium
Phedimus spurius	Species	Sedum spurium
Phedimus stellatus	Species	Sedum stellatum
Phedimus stoloniferus	sp.	Sedum stoloniferum	sp.
Phelipanche purpurea subsp. purpurea	subsp.	Phelipanche purpurea	sp.	Autonym
Phleum alpinum subsp. alpinum	subsp.	Phleum alpinum	sp.	Autonym
Phleum crypsoides subsp. crypsoides	subsp.	Phleum crypsoides	sp.	Autonym
Phyllitis scolopendrium subsp. scolopendrium	subsp.	Asplenium scolopendrium	sp.	Autonym
Physalis alkekengi aggr.	aggr.	Physalis alkekengi	sp.
Physalis alkekengi var. alkekengi	var.	Physalis alkekengi	sp.	Autonym
Physalis alkekengi var. franchetii	var.	Physalis alkekengi	sp.
Phyteuma columnae	sp.	Phyteuma scheuchzeri subsp. columnae
Picea abies subsp. abies	subsp.	Picea abies	sp.	Autonym
Picea ajanensis	sp.	Picea jezoensis subsp. jezoensis	subsp.
Picea canadensis	sp.	Picea laxa	sp.
Picea fennica		Picea x fennica
Picea schrenkiana	sp.	Picea schrenkiana	sp.
Picris hieracioides aggr.	aggr.	Picris hieracioides	sp.
Pilea muscosa	sp.	Pilea microphylla
Pilosella acutifolia coll.	coll.	Pilosella acutifolia aggr.	aggr.
Pilosella alpicola subsp. alpicola	subsp.	Pilosella alpicola	sp.	Autonym
Pilosella aurantiaca subsp. aurantiaca var. aurantiaca	subsp.	Pilosella aurantiaca subsp. aurantiaca	subsp.
Pilosella auriculiformis coll.	coll.	Pilosella auriculiformis aggr.	aggr.
Pilosella balansae coll.	coll.	Pilosella balansae aggr.	aggr.
Pilosella bifurca coll.	coll.	Pilosella bifurca aggr.	aggr.
Pilosella calomastix coll.	coll.	Pilosella calomastix aggr.	aggr.
Pilosella corymbulifera coll.	coll.	Pilosella corymbulifera aggr.	aggr.
Pilosella crassiseta coll.	coll.	Pilosella crassiseta aggr.	aggr.
Pilosella dubia coll.	coll.	Pilosella dubia aggr.	aggr.
Pilosella fallacina coll.	coll.	Pilosella fallacina aggr.	aggr.
Pilosella flagellaris subsp. flagellaris	subsp.	Pilosella flagellaris	sp.	Autonym
Pilosella flagellaris coll.	coll.	Pilosella flagellaris aggr.	aggr.
Pilosella floribunda coll.	coll.	Pilosella floribunda aggr.	aggr.
Pilosella fusca coll.	coll.	Pilosella fusca aggr.	aggr.
Pilosella heterodoxa coll.	coll.	Pilosella heterodoxa aggr.	aggr.
Pilosella iserana coll.	coll.	Pilosella iserana aggr.	aggr.
Pilosella kalksburgensis coll.	coll.	Pilosella kalksburgensis aggr.	aggr.
Pilosella lathraea coll.	coll.	Pilosella lathraea aggr.	aggr.
Pilosella maschukensis coll.	coll.	Pilosella maschukensis aggr.	aggr.
Pilosella megatricha coll.	coll.	Pilosella megatricha aggr.	aggr.
Pilosella melinomelas coll.	coll.	Pilosella melinomelas aggr.	aggr.
Pilosella officinarum subsp. officinarum	subsp.	Pilosella officinatum	sp.
Pilosella piloselloides aggr.	aggr.	Pilosella piloselloides aggr.	aggr.
Pilosella polymastix coll.	coll.	Pilosella polymastix aggr.	aggr.
Pilosella promeces coll.	coll.	Pilosella promeces aggr.	aggr.
Pilosella pseudoblyttii	sp.	Pilosella blyttiana	sp.
Pilosella ruprechtii coll.	coll.	Pilosella ruprechtii aggr.	aggr.
Pilosella schultesii coll.	coll.	Pilosella schultesii aggr.	aggr.
Pilosella setifolia coll.	coll.	Pilosella setifolia aggr.	aggr.
Pilosella sphaerocephala coll.	coll.	Pilosella sphaerocephala aggr.	aggr.
Pilosella stenosoma coll.	coll.	Pilosella stenosoma aggr.	aggr.
Pilosella stoloniflora coll.	coll.	Pilosella stoloniflora aggr.	aggr.
Pilosella suecica	sp.	Pilosella floribunda aggr.	aggr.
Pilosella sulphurea coll.	coll.	Pilosella sulphurea aggr.	aggr.
Pilosella ziziana coll.	coll.	Pilosella ziziana aggr.	aggr.
Pimpinella major aggr.	aggr.	Pimpinella major	sp.
Pimpinella rubra	sp.	Pimpinella major subsp. rubra
Pinguicula arvetii	sp.	Pinguicula leptoceras	sp.	WFO (2022)
Pinguicula arvetii	sp.	Pinguicula leptoceras
Pinguicula rosea	sp.	Pinguicula grandiflora subsp. rosea
Pinguicula vulgaris var. alpicola	Variety	Pinguicula vulgaris
Pinus calabrica	Species	Pinus nigra subsp. laricio
Pinus engadiniensis	sp.	Pinus x rhaetica	hyb.-sp.
Pinus funebris	sp.	Pinus densiflora	sp.
Pinus halepensis subsp. halepensis	subsp.	Pinus halepensis	sp.	Autonym
Pinus mugo subsp. pumilio	subsp.	Pinus mugo	sp.
Pinus nigra var. maritima		Pinus nigra subsp. laricio
Pinus sylvestris subsp. engadinensis	subsp.	Pinus x rhaetica nothosubsp. rhaetica	nothosubsp.	https://powo.science.kew.org/taxon/urn:lsid:ipni.org:names:77260342-1
Pinus sylvestris subsp. sylvestris	subsp.	Pinus sylvestris	sp.	Autonym
Pinus uncinata subsp. uliginosa	Subspecies	Pinus mugo subsp. uliginosa
Pinus x rotundata	hyb.-sp.	Pinus mugo subsp. rotundata	subsp.
Pisum sativum aggr.	aggr.	Pisum sativum	sp.
Pisum sativum subsp. sativum var. sativum	subsp.	Pisum sativum subsp. sativum	subsp.
Plantago alpina aggr.	aggr.	Plantago maritima aggr.	aggr.
Plantago atrata aggr.	aggr.	Plantago atrata	sp.
Plantago caucasica		Plantago atrata subsp. spadicea
Plantago coronopus subsp. humilis	Subspecies	Plantago coronopus
Plantago coronopus subsp. stricta		Plantago coronopus
Plantago lanceolata subsp. lanceolata	subsp.	Plantago lanceolata	sp.	Autonym
Plantago lanceolata var. lanceolata	var.	Plantago lanceolata	sp.	Autonym
Plantago major aggr.	aggr.	Plantago major	sp.
Plantago maritima var. integralis	var.	Plantago maritima subsp. maritima	subsp.	https://powo.science.kew.org/taxon/urn:lsid:ipni.org:names:2930353-4
Plantago scabra subsp. scabra	subsp.	Plantago arenaria subsp. arenaria	subsp.
Plantago serpentina aggr.	aggr.	Plantago maritima aggr.	aggr.
Platanthera bifolia + chlorantha	list	Platanthera bifolia aggr.	aggr.
Plocama calabrica	Species	Putoria calabrica
Poa alpina subsp. alpina var. alpina	subsp.	Poa alpina subsp. alpina	subsp.
Poa anceps	sp.	Poa pratensis	sp.	WFO (2022)
Poa annua aggr.	aggr.	Ochlopoa annua aggr.	aggr.
Poa annua var. annua	var.	Ochlopoa annua subsp. annua	subsp.
Poa annua var. aquatica	Variety	Poa annua
Poa annua var. reptans	var.	Ochlopoa annua	sp.
Poa bulbosa subsp. bulbosa var. bulbosa	subsp.	Poa bulbosa subsp. bulbosa	subsp.
Poa compressa subsp. compressa	subsp.	Poa compressa	sp.	Autonym
Poa glauca var. jurassica	Variety	Poa glauca
Poa molinerii subsp. molinerii	subsp.	Poa molinerii	sp.	Autonym
Poa supina var. exigua	Variety	Ochlopoa supina
Poa trivialis aggr.	aggr.	Poa trivialis	sp.
Podospermum laciniatum subsp. laciniatum	subsp.	Scorzonera laciniata subsp. laciniata	subsp.
Polygala alpestris aggr.	aggr.	Polygala alpestris	sp.
Polygala amarella subsp. amarella	subsp.	Polygala amarella	sp.	Autonym
Polygala calliptera	sp.	Polygala vulgaris subsp. calliptera
Polygala oxyptera + vulgaris	list	Polygala vulgaris	sp.
Polygala vulgaris aggr.	aggr.	Polygala vulgaris	sp.
Polygonatum odoratum subsp. odoratum	subsp.	Polygonatum odoratum	sp.	Autonym
Polygonum arenastrum subsp. arenastrum	subsp.	Polygonum arenastrum	sp.	Autonym
Polygonum aviculare aggr.	aggr.	Polygonum aviculare aggr.	aggr.
Polygonum hydropiper aggr.	aggr.	Persicaria hydropiper aggr.	aggr.
Polygonum lapathifolium aggr.	aggr.	Persicaria lapathifolia aggr.	aggr.
Polygonum lapathifolium subsp. lapathifolium	subsp.	Persicaria lapathifolia subsp. lapathifolia	subsp.
Polygonum leptocladum	sp.	Persicaria lapathifolia subsp. leptoclada
Polystichum aculeatum aggr.	aggr.	Polystichum aculeatum	aggr.
Populus diversifolia	sp.	Populus euphratica	sp.
Populus maximowiczii	Species	Populus suaveolens
Populus nigra aggr.	aggr.	Populus nigra	aggr.
Populus nigra subsp. nigra var. nigra	subsp.	Populus nigra subsp. nigra	subsp.
Portulaca oleracea subsp. oleracea	subsp.	Portulaca oleracea	sp.	Autonym
Potamogeton gramineus subsp. gramineus	subsp.	Potamogeton gramineus	sp.	Autonym
Potamogeton pectinatus aggr.	aggr.	Stuckenia pectinata aggr.	aggr.
Potamogeton pectinatus subsp. pectinatus	subsp.	Stuckenia pectinata	sp.	Autonym
Potamogeton x zizii	hyb.-sp.	Potamogeton x angustifolius	hyb.-sp.
Potentilla anglica aggr.	aggr.	Potentilla anglica	sp.
Potentilla anglica subsp. anglica	subsp.	Potentilla anglica	sp.	Autonym
Potentilla anserina subsp. anserina	subsp.	Argentina anserina subsp. anserina	subsp.
Potentilla arenaria	sp.	Potentilla incana	sp.	Euro+Med (2022)
Potentilla arenaria subsp. arenaria		Potentilla incana
Potentilla argentea aggr.	aggr.	Potentilla argentea	sp.
Potentilla argentea subsp. argentea	subsp.	Potentilla argentea	sp.	Autonym
Potentilla collina aggr.	aggr.	Potentilla collina aggr.	aggr.
Potentilla crantzii aggr.	aggr.	Potentilla crantzii	sp.
Potentilla incana subsp. arenaria		Potentilla incana
Potentilla nivea subsp. floccosa	Subspecies	Potentilla nivea subsp. nivea
Poterium sanguisorba subsp. sanguisorba	subsp.	Sanguisorba minor subsp. minor	subsp.
Prenanthes purpurea aggr.	aggr.	Prenanthes purpurea	sp.
Prenanthes purpurea var. angustifolia	Variety	Prenanthes purpurea
Primula amoena var. kazbek		Primula elatior subsp. amoena
Primula auricula aggr.	aggr.	Primula auricula	sp.
Primula cynoglossifolia	sp.	Primula latifolia subsp. cynoglossifolia	subsp.
Primula elatior aggr.	aggr.	Primula elatior	sp.
Primula grignensis	Species	Primula hirsuta		Pignatti S., Guarino, R., La Rosa M. (2017-2019) Flora d'Italia, 2nd edition. Edagricole, Edizioni Agricole di New Business Media, Bologna.
Primula infecta	Species	Primula infecta subsp. sellae		Pignatti S., Guarino, R., La Rosa M. (2017-2019) Flora d'Italia, 2nd edition. Edagricole, Edizioni Agricole di New Business Media, Bologna.
Primula irmingardis	sp.	Primula villosa	sp.
Primula matthioli	Species	Cortusa matthioli
Primula veris aggr.	aggr.	Primula veris	sp.
Primula widmerae	sp.	Primula auricula subsp. widmerae	subsp.
Primula x anglica	hyb.-sp.	Primula x tristis	hyb.-sp.
Pritzelago alpina aggr.	aggr.	Hornungia alpina	sp.
Pritzelago austroalpina	sp.	Hornungia alpina subsp. austroalpina
Pritzelago brevicaulis	sp.	Hornungia alpina subsp. brevicaulis
Prospero autumnale aggr.	aggr.	Prospero autumnale	sp.
Prunus avium subsp. avium	subsp.	Prunus avium	sp.	Autonym
Prunus cerasus aggr.	aggr.	Prunus cerasus	sp.
Prunus domestica aggr.	aggr.	Prunus domestica	sp.
Prunus mahaleb subsp. mahaleb	subsp.	Prunus mahaleb	sp.	Autonym
Prunus padus aggr.	aggr.	Prunus padus	sp.
Psammophiliella muralis	Species	Gypsophila muralis
Psammophiliella muralis	Species	Gypsophila muralis
Psammophiliella muralis		Gypsophila muralis
Psammophiliella stepposa		Gypsophila muralis
Psephellus sosnowskyi		Psephellus dealbatus
Pseudolysimachion longifolium subsp. longifolium	subsp.	Veronica longifolia subsp. longifolia	subsp.
Pseudolysimachion nitens	sp.	Veronica barrelieri subsp. nitens
Pseudolysimachion pallens	Species	Veronica incana subsp. pallens
Pseudolysimachion pallens	sp.	Veronica incana subsp. pallens
Pseudolysimachion spicatum aggr.	aggr.	Veronica spicata aggr.	aggr.
Pseudolysimachion spicatum subsp. spicatum	subsp.	Veronica spicata subsp. spicata	subsp.
Pseudorchis albida aggr.	aggr.	Pseudorchis albida	sp.
Pseudorchis tricuspis	sp.	Pseudorchis albida subsp. tricuspis
Pseudorlaya pumila var. microcarpa	Variety	Pseudorlaya pumila
Pseudorlaya pumila var. pumila	var.	Pseudorlaya pumila	sp.	Autonym
Pteridium aquilinum subsp. aquilinum	subsp.	Pteridium aquilinum	sp.	Autonym
Pteridium aquilinum subsp. capense	subsp.	Pteridium aquilinum	sp.
Puccinellia convoluta subsp. pseudobulbosa		Puccinellia dolicholepis subsp. fominii
Pulmonaria alpigena	sp.	Pulmonaria mollis subsp. alpigena
Pulmonaria apennina	sp.	Pulmonaria vallarsae	sp.
Pulmonaria cevennensis	sp.	Pulmonaria longifolia
Pulmonaria delphinensis	sp.	Pulmonaria longifolia
Pulmonaria jurana	sp.	Pulmonaria montana subsp. jurana
Pulmonaria mollis aggr.	aggr.	Pulmonaria montana aggr.	aggr.
Pulsatilla alpina aggr.	aggr.	Pulsatilla alpina	sp.
Pulsatilla austroalpina	sp.	Pulsatilla alpina subsp. austroalpina
Pulsatilla cottianaea	sp.	Pulsatilla alpina subsp. cottianaea
Pulsatilla flavescens	Species	Pulsatilla pratensis
Pulsatilla grandis subsp. grandis	subsp.	Pulsatilla vulgaris subsp. grandis	subsp.
Pulsatilla halleri aggr.	aggr.	Pulsatilla halleri	sp.
Pulsatilla hungarica	sp.	Pulsatilla pratensis	sp.	Euro+Med (2022)
Pulsatilla micrantha	sp.	Pulsatilla alpina subsp. alba
Pulsatilla micrantha		Pulsatilla alpina subsp. alpina
Pulsatilla millefoliata	sp.	Pulsatilla alpina subsp. millefoliata
Pulsatilla pratensis subsp. pratensis	subsp.	Pulsatilla pratensis	sp.	Autonym
Pulsatilla schneebergensis	sp.	Pulsatilla alpina subsp. schneebergensis
Pulsatilla vernalis var. alpestris	Variety	Pulsatilla vernalis
Pulsatilla vernalis var. vernalis	var.	Pulsatilla vernalis	sp.	Autonym
Pulsatilla vulgaris aggr.	aggr.	Pulsatilla vulgaris	sp.
Pyrola incarnata	sp.	Pyrola asarifolia subsp. asarifolia	subsp.
Pyrus communis aggr.	aggr.	Pyrus communis aggr. s.l.	aggr. s.l.
Pyrus pyraster aggr.	aggr.	Pyrus communis aggr.	aggr.
Quercus coccinea	sp.	Quercus palustris
Quercus coccinea	Species	Quercus rubra
Quercus ilex subsp. ilex	subsp.	Quercus ilex	sp.	Autonym
Quercus pubescens aggr.	aggr.	Quercus pubescens	sp.
Quercus robur aggr.	aggr.	Quercus robur aggr. s.l.	aggr. s.l.
Ranunculus acris aggr.	aggr.	Ranunculus acris	sp.
Ranunculus alpestris aggr.	aggr.	Ranunculus alpestris	sp.
Ranunculus aquatilis + peltatus	list	Ranunculus aquatilis aggr.	aggr.
Ranunculus aquatilis subsp. aquatilis	subsp.	Ranunculus aquatilis	sp.	Autonym
Ranunculus aquatilis var. aquatilis	var.	Ranunculus aquatilis	sp.	Autonym
Ranunculus aquatilis var. diffusus		Ranunculus trichophyllus
Ranunculus auricomus	sp.	Ranunculus auricomus aggr.	aggr.
Ranunculus auricomus coll.	coll.	Ranunculus auricomus aggr.	aggr.
Ranunculus auricomus subaggr.	subaggr.	Ranunculus auricomus aggr.	aggr.
Ranunculus auricomus subaggr.	Subaggr.	Ranunculus auricomus aggr.
Ranunculus auricomus subaggr.	Subaggr.	Ranunculus auricomus aggr.
Ranunculus auricomus subsp. auricomus	subsp.	Ranunculus auricomus aggr.	aggr
Ranunculus bulbosus aggr.	aggr.	Ranunculus bulbosus	sp.
Ranunculus cabrerensis subsp. cabrerensis	subsp.	Ranunculus parnassiifolius subsp. cabrerensis	subsp.	Euro+Med (2022)
Ranunculus cabrerensis subsp. muniellensis		Ranunculus parnassifolius subsp. muniellensis
Ranunculus cassubicus subaggr.	subaggr.	Ranunculus auricomus aggr.	aggr.
Ranunculus ficaria aggr.	aggr.	Ficaria verna	sp.
Ranunculus ficaria subsp. ficaria	subsp.	Ficaria verna subsp. verna	subsp.
Ranunculus peltatus var. heterophyllus		Ranunculus aquatilis
Ranunculus penicillatus subsp. penicillatus var. penicillatus	subsp.	Ranunculus penicillatus subsp. penicillatus	subsp.
Ranunculus polyanthemos aggr.	aggr.	Ranunculus polyanthemos	sp.
Ranunculus sardous subsp. sardous	subsp.	Ranunculus sardous	sp.	Autonym
Ranunculus tuberosus aggr.	aggr.	Ranunculus polyanthemos	sp.
Raphanus odessanus		Raphanus raphanistrum subsp. landra
Raphanus raphanistrum aggr.	aggr.	Raphanus raphanistrum	sp.
Rapistrum rugosum aggr.	aggr.	Rapistrum rugosum	sp.
Rapistrum rugosum subsp. linnaeanum	Subspecies	Rapistrum rugosum
Reseda lutea subsp. lutea	subsp.	Reseda lutea	sp.	Autonym
Reynoutria japonica var. japonica	var.	Reynoutria japonica	sp.	Autonym
Rhamnus alpina aggr.	aggr.	Rhamnus alpina	sp.
Rhinanthus alpinus aggr.	aggr.	Rhinanthus aristatus aggr.	aggr.
Rhinanthus pumilus	Species	Rhinanthus mediterraneus
Rhinanthus pumilus	Species	Rhinanthus mediterraneus
Rhinanthus riphaeus	Species	Rhinanthus alpinus
Rhinanthus rumelicus subsp. rumelicus	subsp.	Rhinanthus rumelicus	sp.	Autonym
Rhinanthus serotinus subsp. asturicus		Rhinanthus angustifolius
Ribes acidum	Species	Ribes spicatum subsp. lapponicum
Ribes acidum	sp.	Ribes spicatum subsp. lapponicum	subsp.	https://powo.science.kew.org/taxon/792530-1
Ribes rubrum var. domesticum	var.	Ribes rubrum	sp.
Ribes sandalioticum	Species	Ribes multiflorum subsp. sandalioticum
Ribes uva-crispa subsp. uva-crispa	subsp.	Ribes uva-crispa	sp.	Autonym
Rorippa nasturtium-aquaticum aggr.	aggr.	Nasturtium officinale aggr.	aggr.
Rorippa palustris aggr.	aggr.	Rorippa islandica aggr.	aggr.
Rorippa prostrata		Rorippa x anceps
Rorippa prostrata	Species	Rorippa x anceps
Rorippa prostrata		Rorippa x anceps
Rorippa pyrenaica var. pyrenaica	var.	Rorippa pyrenaica	sp.	Autonym
Rorippa sylvestris aggr.	aggr.	Rorippa sylvestris	sp.
Rosa afzeliana aggr.	aggr.	Rosa canina aggr. s.l.	aggr. s.l.
Rosa agrestis var. agrestis	var.	Rosa agrestis	sp.	Autonym
Rosa agrestis var. albiflora	Variety	Rosa agrestis
Rosa agrestis var. gizellae	Variety	Rosa agrestis
Rosa agrestis var. schulzei	Variety	Rosa agrestis
Rosa canina subsp. canina	subsp.	Rosa canina	sp.	Autonym
Rosa canina subsp. corymbifera	Subspecies	Rosa corymbifera
Rosa centifolia	sp.	Rosa x centifolia	hyb.-sp.
Rosa dumalis subsp. dumalis	subsp.	Rosa dumalis	sp.	Autonym
Rosa heckeliana subsp. heckeliana	subsp.	Rosa heckeliana	sp.	Autonym
Rosa mollis aggr.	aggr.	Rosa mollis	sp.
Rosa rubiginosa var. dunensis	Variety	Rosa rubiginosa
Rosa scabriuscula	sp.	Rosa x scabriuscula	hyb.-sp.
Rosa seraphinii		Rosa serafinii
Rosa spinosissima subsp. spinosissima	subsp.	Rosa spinosissima	sp.	Autonym
Rosa tomentosa aggr.	aggr.	Rosa villosa aggr.	sp.
Rubia peregrina subsp. requienii	Subspecies	Rubia peregrina subsp. longifolia
Rubus atrichantherus var. atrichantherus	var.	Rubus atrichantherus	sp.	Autonym
Rubus atrichantherus var. vestitior	var.	Rubus atrichantherus	sp.
Rubus canescens aggr.	aggr.	Rubus canescens	sp.
Rubus canescens subsp. canescens	subsp.	Rubus canescens	sp.	Autonym
Rubus canescens var. canescens	var.	Rubus canescens	sp.	Autonym
Rubus canescens var. glabratus	var.	Rubus canescens	sp.
Rubus corylifolius aggr.	aggr.	Rubus sect. Corylifolii	sect.
Rubus fabrimontanus var. fabrimontanus	var.	Rubus fabrimontanus	sp.	Autonym
Rubus fabrimontanus var. tuberculatiformis	var.	Rubus fabrimontanus	sp.
Rubus foliosus var. foliosus	var.	Rubus foliosus	sp.	Autonym
Rubus gracilis subsp. gracilis	subsp.	Rubus gracilis	sp.	Autonym
Rubus gravetii	sp.	Rubus adornatoides	sp.	Euro+Med (2022)
Rubus nemoralis var. argyriophyllus	var.	Rubus nemoralis	sp.
Rubus nemoralis var. nemoralis	var.	Rubus nemoralis	sp.	Autonym
Rubus plicatus var. plicatus	var.	Rubus plicatus	sp.	Autonym
Rubus reuteri	sp.	Rubus koehleri	sp.
Rumex acetosella aggr.	aggr.	Rumex acetosella	sp.
Rumex acetosella subsp. acetosella var. acetosella	subsp.	Rumex acetosella subsp. acetosella	subsp.
Rumex obtusifolius aggr.	aggr.	Rumex obtusifolius	sp.
Rumex obtusifolius var. microcarpus	Variety	Rumex obtusifolius subsp. silvestris
Rumex subalpinus	sp.	Rumex obtusifolius subsp. subalpinus
Sabulina rubella	sp.	Minuartia rubella	sp.
Sabulina stricta	sp.	Minuartia stricta	sp.
Sabulina viscosa	sp.	Minuartia viscosa	sp.
Sagina apetala aggr.	aggr.	Sagina apetala	sp.
Sagina apetala subsp. apetala	subsp.	Sagina apetala	sp.	Autonym
Sagina procumbens subsp. procumbens	subsp.	Sagina procumbens	sp.	Autonym
Sagina procumbens var. procumbens	var.	Sagina procumbens	sp.	Autonym
Sagina subulata subsp. revelierei	Subspecies	Sagina subulata
Sagina subulata subsp. subulata var. subulata	subsp.	Sagina subulata var. subulata	var.
Salicornia europaea aggr.	aggr.	Salicornia europaea aggr.	aggr.
Salicornia europaea subsp. disarticulata	Subspecies	Salicornia disarticulata
Salicornia europaea subsp. europaea	subsp.	Salicornia europaea	sp.	Autonym
Salicornia europaea subsp. x marshallii	nothosubsp.	Salicornia x marshallii	hyb.-sp.
Salicornia perennans subsp. perennans	subsp.	Salicornia perennans	sp.	Autonym
Salicornia procumbens aggr.	aggr.	Salicornia procumbens aggr.	aggr.
Salicornia procumbens var. stricta		Salicornia procumbens subsp. procumbens
Salix alba aggr.	aggr.	Salix alba	sp.
Salix alba subsp. alba	subsp.	Salix alba	sp.	Autonym
Salix alba var. alba	var.	Salix alba	sp.	Autonym
Salix alpina aggr.	aggr.	Salix myrsinites aggr.	aggr.
Salix angustior	sp.	Salix purpurea
Salix atrocinerea x bicolor	hyb.-sp. (formula)	Salix bicolor x cinerea	hyb.-sp. (formula)
Salix atrocinerea x repens	hyb.-sp. (formula)	Salix x subsericea	hyb.-sp.
Salix cinerea x repens	hybr.-sp. (formula)	Salix x subsericea	hybr.-sp.	Müller et al. (2021)
Salix elegantissima	sp.	Salix x pendulina	hyb.-sp.
Salix lapponum var. daphneola	Variety	Salix lapponum
Salix lapponum var. lapponum	var.	Salix lapponum	sp.	Autonym
Salix pentandra x cinerea	hyb.-sp. (formula)	Salix cinerea x pentandra	hyb.-sp. (formula)
Salix purpurea aggr.	aggr.	Salix purpurea	sp.
Salix purpurea subsp. purpurea	subsp.	Salix purpurea	sp.	Autonym
Salix repens aggr.	aggr.	Salix repens	sp.
Salix repens subsp. repens var. repens	subsp.	Salix repens subsp. repens	subsp.
Salix triandra aggr.	aggr.	Salix triandra	sp.
Salix waldsteiniana aggr.	aggr.	Salix arbuscula aggr.	aggr.
Salix x charrieri	hyb.-sp.	Salix x multinervis	hyb.-sp.	Müller et al. (2021)
Salix x guinieri	hyb.-sp.	Salix cinerea subsp. oleifolia	subsp.	WFO (2022)
Salix x kalmthoutensis	hyb.-sp.	Salix x ambigua nothosubsp. maritima	nothosubsp.
Salix x laestadiana	hyb.-sp.	Salix x canescens	hyb.-sp.
Salix x undulata	hyb.-sp.	Salix x mollissima	hyb.-sp.
Salsola kali aggr.	aggr.	Salsola kali aggr.	aggr.
Salsola kali subsp. kali	subsp.	Salsola kali	sp.	Autonym
Salsola subaphylla	sp.	Halothamnus subaphyllus	sp.
Salvia verbenaca subsp. verbenaca	subsp.	Salvia verbenaca	sp.	Autonym
Sambucus nigra cv. 'Laciniata'	cv.	Sambucus nigra	sp.
Sanguisorba officinalis aggr.	aggr.	Sanguisorba officinalis	sp.
Satureja montana aggr.	aggr.	Satureja montana	sp.
Satureja vulgaris subsp. vulgaris	subsp.	Clinopodium vulgare subsp. vulgare	subsp.
Saussurea alpina subsp. alpina	subsp.	Saussurea alpina	sp.	Autonym
Saxifraga apennina	Species	Saxifraga cuneifolia
Saxifraga cuneifolia aggr.	aggr.	Saxifraga cuneifolia	sp.
Saxifraga engleri	Species	Saxifraga stellaris subsp. engleri
Saxifraga granulata cv. 'Plena'	cv.	Saxifraga granulata	sp.
Saxifraga oppositifolia aggr.	aggr.	Saxifraga oppositifolia aggr. s.l.	aggr. s.l.
Saxifraga paniculata subsp. paniculata	subsp.	Saxifraga paniculata	sp.	Autonym
Saxifraga prolifera	sp.	Saxifraga stellaris subsp. engleri
Saxifraga pseudoexarata	sp.	Saxifraga moschata	sp.	Euro+Med (2022)
Saxifraga punctata	Species	Saxifraga nelsoniana
Saxifraga repanda		Saxifraga rotundifolia subsp. rotundifolia
Saxifraga rosacea aggr.	aggr.	Saxifraga rosacea	sp.
Saxifraga stellaris aggr.	aggr.	Saxifraga stellaris	sp.
Saxifraga subverticillata		Saxifraga subverticillata
Saxifraga umbrosa aggr.	aggr.	Saxifraga umbrosa	sp.
Scabiosa maritima aggr.	aggr.	Sixalix atropurpurea	sp.
Schenkia spicata	Species	Centaurium spicatum
Schoenoplectus americanus	sp.	Schoenoplectus pungens	sp.
Schoenoplectus americanus	Species	Schoenoplectus pungens
Schoenoplectus americanus	sp.	Schoneplectus pungens	sp.
Schoenoplectus lacustris aggr.	aggr.	Scirpus lacustris	sp.
Schoenoplectus setaceus		Isolepis setacea
Schoenoplectus setaceus		Isolepis setacea
Schoenoplectus x kalmussi	hyb.-sp.	Schoenoplectus x carinatus	hyb.-sp.
Scilla bifolia aggr.	aggr.	Scilla bifolia	sp.
Scilla bifolia subsp. bifolia	subsp.	Scilla bifolia	sp.	Autonym
Scilla bifolia subsp. rara	Subspecies	Scilla bifolia
Scilla bifolia subsp. spetana	Subspecies	Scilla bifolia
Scilla bifolia var. bohemica	Variety	Scilla bifolia
Scilla bifolia var. magnomoravica	Variety	Scilla bifolia
Scilla bifolia var. spetana	Variety	Scilla bifolia
Scilla nana subsp. nana	subsp.	Scilla nana	sp.	Autonym
Scirpoides holoschoenus aggr.	aggr.	Scirpoides holoschoenus	sp.
Scirpoides holoschoenus subsp. holoschoenus	subsp.	Scirpoides holoschoenus	sp.	Autonym
Scirpoides holoschoenus subsp. romanus	Subspecies	Scirpoides holoschoenus
Scirpoides romanus	sp.	Scirpoides holoschoenus
Scirpus atrovirens aggr.	aggr.	Scirpus atrovirens	sp.
Scirpus lacustris subsp. lacustris	subsp.	Schoenoplectus lacustris subsp. lacustris	subsp.
Scleranthus syvaschicus		Scleranthus verticillatus
Scorzonera laciniata aggr.	aggr.	Scorzonera laciniata	sp.
Scrophularia canina aggr.	aggr.	Scrophularia canina	sp.
Scrophularia variegata		Scrophularia heterophylla subsp. laciniata
Scutellaria galericulata x minor	hyb.-sp. (formula)	Scutellaria x nicholsonii	hyb.-sp.
Scutellaria x hybrida	hyb.-sp.	Scutellaria x nicholsonii	hyb.-sp.
Sedum argutum	Species	Hylotelephium telephium
Sedum atratum aggr.	aggr.	Sedum atratum	sp.
Sedum carinthiacum	sp.	Sedum atratum subsp. carinthiacum
Sedum krajinae	Species	Sedum acre
Sedum litoreum subsp. litoreum	subsp.	Sedum litoreum	subsp.
Sedum litoreum subsp. praesidis	Subspecies	Sedum praesidis
Sedum telephium aggr.	aggr.	Hylotelephium telephium aggr.	aggr.
Sedum telephium subsp. telephium	subsp.	Hylotelephium telephium	sp.	Autonym
Sedum urvillei subsp. hillebrandtii		Sedum urvillei
Sedum urvillei subsp. urvillei	subsp.	Sedum urvillei	sp.	Autonym
Selaginella uliginosa		Gnaphalium uliginosum
Selaginella uliginosa subsp. uliginosa	subsp.	Selaginella uliginosa	sp.	Autonym
Sempervivum arachnoideum aggr.	aggr.	Sempervivum arachnoideum	sp.
Sempervivum giuseppii	sp.	Sempervivum x giuseppii	hyb.-sp.
Sempervivum montanum aggr.	aggr.	Sempervivum montanum	sp.
Sempervivum montanum subsp. montanum var. montanum	subsp.	Sempervivum montanum subsp. montanum	subsp.
Sempervivum tectorum subsp. decoloratum	Subspecies	Sempervivum tectorum
Senecio abrotanifolius aggr.	aggr.	Jacobaea abrotanifolia	sp.
Senecio abrotanifolius subsp. abrotanifolius	subsp.	Jacobaea abrotanifolia subsp. abrotanifolia	subsp.
Senecio aconitifolius	sp.	Syneilesis aconitifolia	sp.	WFO (2022)
Senecio alpinus aggr.	aggr.	Jacobaea alpina aggr.	aggr.
Senecio aquaticus aggr.	aggr.	Jacobaea erucifolia aggr.	aggr.
Senecio aquaticus subsp. aquaticus	subsp.	Jacobaea aquatica	sp.	Autonym
Senecio capitatus var. leiocarpus		Tephroseris integrifolia subsp. capitata
Senecio erraticus subsp. erraticus	subsp.	Jacobaea erratica	sp.	Autonym
Senecio erucifolius subsp. erucifolius	subsp.	Jacobaea erucifolia subsp. erucifolia	subsp.
Senecio germanicus subsp. germanicus	subsp.	Senecio nemorensis subsp. jacquinianus	subsp.
Senecio gnaphalodes	Species	Jacobaea gnaphalioides
Senecio immunis	sp.	Jacobaea paludosa subsp. paludosa
Senecio incanus aggr.	aggr.	Jacobaea incana aggr. s.l.	aggr. s.l.
Senecio jacobaea aggr.	aggr.	Jacobaea erucifolia aggr.	aggr.
Senecio jacobaea subsp. jacobaea	subsp.	Jacobaea vulgaris subsp. vulgaris	subsp.
Senecio ovatus aggr.	aggr.	Senecio nemorensis aggr.	aggr.
Senecio paludosus subsp. paludosus	subsp.	Jacobaea paludosa subsp. paludosa	subsp.
Senecio sosnowskyi		Senecio leucanthemifolius subsp. caucasicus
Serratula tinctoria aggr.	aggr.	Serratula tinctoria	sp.
Serratula tinctoria prol. sylvicola	Proles	Serratula tinctoria
Seseli annuum aggr.	aggr.	Seseli annuum	sp.
Seseli coloratum	Species	Seseli annuum subsp. annuum
Seseli elatum aggr.	aggr.	Seseli longifolium aggr.	aggr.
Seseli libanotis subsp. pyrenaicum		Seseli libanotis
Sesleria albicans subsp. albicans	subsp.	Sesleria caerulea subsp. caerulea	subsp.
Sesleria autumnalis aggr.	aggr.	Sesleria autumnalis	sp.
Setaria glauca		Setaria pumila
Setaria glauca		Setaria pumila
Setaria glauca	Species	Setaria pumila
Setaria glauca	Species	Setaria pumila
Setaria verticillata var. verticillata	var.	Setaria verticillata	sp.	Autonym
Setaria verticillata x italica subsp. viridis	nothosubsp. (formula)	Setaria verticillata x viridis	hyb.-sp. (formula)
Setaria viridis aggr.	aggr.	Setaria viridis aggr. s.l.	aggr. s.l.
Sherardia arvensis subsp. arvensis	subsp.	Sherardia arvensis	sp.	Autonym
Sideritis vulgaris	sp.	Sideritis hirsuta subsp. hirsuta	subsp.	Euro+Med (2022)
Silaum silaus var. silaus	var.	Silaum silaus	sp.	Autonym
Silaus besseri	Species	Silaum silaus
Silene acaulis aggr.	aggr.	Silene acaulis	sp.
Silene alba subsp. alba	subsp.	Silene latifolia	sp.	Autonym
Silene alpinoprostrata	sp.	Silene vulgaris subsp. prostrata
Silene badaroi	sp.	Silene tyrrhenia	sp.
Silene badaroi	Species	Silene tyrrhenia
Silene badaroi	Species	Silene tyrrhenia
Silene dioica var. dioica	var.	Silene dioica	sp.	Autonym
Silene dioica var. zetlandica	var.	Silene dioica	sp.
Silene notarisii	Species	Silene parnassica
Silene nutans aggr.	aggr.	Silene nutans aggr. s.l.	aggr. s.l.
Silene nutans subsp. nutans var. nutans	subsp.	Silene nutans subsp. nutans	subsp.
Silene pusilla aggr.	aggr.	Heliosperma pusillum aggr.	aggr.
Silene pusilla subsp. pudibunda		Heliospermum pusillum	sp.
Silene pusilla subsp. quadridentata		Heliospermum pusillum	sp.
Silene saxifraga aggr.	aggr.	Silene saxifraga	sp.
Silene syvaschica		Silene multiflora
Silene ucrainica		Silene bupleuroides
Silene vulgaris subsp. antelopum	Subspecies	Silene vulgaris subsp. commutata
Silene vulgaris subsp. antelopum	Subspecies	Silene vulgaris subsp. commutata
Sinapis alba aggr.	aggr.	Sinapis alba	sp.
Sisyrinchium bermudiana		Sisyrinchium angustifolium
Smilacina trifolia	sp.	Maianthemum trifolium	sp.
Solanum dulcamara var. dulcamara	var.	Solanum dulcamara	sp.	Autonym
Solanum dulcamara var. marinum	var.	Solanum dulcamara	sp.	Euro+Med (2022)
Solanum lanceolatum	Species	Solanum torvum
Solanum nigrum aggr.	aggr.	Solanum nigrum aggr. s.l.	aggr. s.l.
Solanum pseudopersicum		Solanum dulcamara
Solanum villosum subsp. villosum	subsp.	Solanum villosum	sp.	Autonym
Soldanella major	sp.	Soldanella hungarica subsp. major	subsp.
Solenopsis minuta subsp. minuta	subsp.	Solenopsis minuta	sp.	Autonym
Solidago virgaurea aggr.	aggr.	Solidago virgaurea	sp.
Sonchus arvensis aggr.	aggr.	Sonchus arvensis	sp.
Sorbus aria aggr.	aggr.	Sorbus aria aggr. s.l.	aggr. s.l.
Sorbus aucuparia aggr.	aggr.	Sorbus aucuparia	sp.
Sorbus graeca var. orbiculata		Sorbus graeca
Sparganium erectum subsp. erectum	subsp.	Sparganium erectum	sp.	Autonym
Sparganium erectum subsp. oocarpum	subsp.	Sparganium x oocarpum	hyb.-sp.	WFO (2022)
Sparganium erectum subsp. oocarpum	subsp.	Sparganium x oocarpum	hyb.-sp.
Sparganium oocarpum	sp.	Sparganium x oocarpum	hyb.-sp.
Spartina patens	Species	Spartina versicolor
Spergula arvensis subsp. arvensis	subsp.	Spergula arvensis	sp.	Autonym
Spergula bocconii	Species	Spergularia bocconei
Spergula catalaunica	Species	Spergularia rubra
Spergula echinosperma	Species	Spergularia echinosperma
Spergula heldreichii	Species	Spergularia heldreichii
Spergula macrorrhiza	Species	Spergularia macrorrhiza
Spergula marina	Species	Spergularia marina
Spergula media	Species	Spergularia media
Spergula nicaeensis	Species	Spergularia nicaeensis
Spergula rupicola	Species	Spergularia rupicola
Spergula segetalis	Species	Spergularia segetalis
Spergula vernalis	sp.	Spergula morisonii
Spiraea chamaedryfolia aggr.	aggr.	Spiraea chamaedryfolia	sp.
Spiraea decumbens aggr.	aggr.	Spiraea decumbens	sp.
Spiraea douglasii subsp. douglasii	subsp.	Spiraea douglasii	sp.	Autonym
Spiraea douglasii subsp. menziesii	Subspecies	Spiraea douglasii
Spirea hypericifolia var. subalpina		Spiraea hypericifolia subsp. hypericifolia
Spirobassia hirsuta	Species	Bassia hirsuta
Spirobassia hirsuta	Species	Bassia hirsuta
Sporobolus pumilus	Species	Spartina versicolor
Stachys recta aggr.	aggr.	Stachys recta	sp.
Stachys sieboldii	sp.	Stachys aegyptiaca
Stellaria fennica + palustris	list	Stellaria palustris aggr.	aggr.
Stellaria neglecta var. neglecta	var.	Stellaria neglecta	sp.	Autonym
Stellaria nemorum aggr.	aggr.	Stellaria nemorum	sp.
Stemmacantha rhapontica aggr.	aggr.	Rhaponticum scariosum aggr.	aggr.
Stipa austriaca	Species	Stipa eriocaulis subsp. austriaca
Stipa dvorakyi	Species	Stipa eriocaulis subsp. dvorakii
Stipa krascheninnikowii	Species	Stipa ucrainica
Stipa submontana	sp.	Stipa pulcherrima subsp. epilosa
Stipellula capensis	Species	Stipa capensis
Stuckenia helvetica	Species	Stuckenia pectinata
Suaeda maritima aggr.	aggr.	Suaeda maritima aggr.	aggr.
Suaeda maritima subsp. maritima	subsp.	Suaeda maritima	sp.	Autonym
Suaeda vera subsp. vera	subsp.	Suaeda vera	sp.	Autonym
Sulla capitata	sp.	Hedysarum spinosissimum	sp.
Sulla capitata	Species	Hedysarum spinosissimum subsp. capitatum
Sulla coronaria	sp.	Hedysarum coronarium	sp.
Sulla coronaria	Species	Hedysarum coronarium
Sulla spinosissima	sp.	Hedysarum spinosissimum	sp.
Sulla spinosissima	Species	Hedysarum spinosissimum subsp. spinosissimum
Swertia perennis subsp. punctata		Swertia perennis
Symphytum x coeruleum	hyb.-sp.	Symphytum x uplandicum	hyb.-sp.	http://www.worldfloraonline.org/taxon/wfo-0000432285
Syringa amurensis	sp.	Syringa reticulata subsp. amurensis	subsp.
Syringa x persica	hyb.-sp.	Syringa persica	sp.
Tanacetum balsamita subsp. balsamita	subsp.	Tanacetum balsamita	sp.	Autonym
Tanacetum clusii	Species	Tanacetum corymbosum subsp. subcorymbosum
Tanacetum clusii	Species	Tanacetum corymbosum subsp. subcorymbosum
Tanacetum clusii	sp.	Tanacetum corymbosum subsp. subcorymbosum
Tanacetum corymbosum aggr.	aggr.	Tanacetum corymbosum	sp.
Taraxacum alpestre aggr.	aggr.	Taraxacum sect. Alpestria	sect.
Taraxacum alpinum aggr.	aggr.	Taraxacum sect. Alpina	sect.
Taraxacum bessarabicum	Species	Taraxacum besarabicum
Taraxacum ceratophorum	sp.	Taraxacum sect. Borealia
Taraxacum ceratophorum aggr.	aggr.	Taraxacum sect. Borelia	sect.
Taraxacum cucullatum aggr.	aggr.	Taraxacum sect. Cucullata	sect.
Taraxacum dissectum	sp.	Taraxacum zermattense
Taraxacum fontanum aggr.	aggr.	Taraxacum sect. Fontana	sect.
Taraxacum hoppeanum		Taraxacum janchenii
Taraxacum laevigatum	sp.	Taraxacum sect. Erythrosperma	sect.
Taraxacum laevigatum	sp.	Taraxacum sect. Erythrosperma
Taraxacum laevigatum aggr.	aggr.	Taraxacum sect. Erythrosperma	sect.
Taraxacum obliquum aggr.	aggr.	Taraxacum sect. Obliqua	sect.
Taraxacum officinale aggr.	aggr.	Taraxacum sect. Taraxacum	sect.
Taraxacum palustre aggr.	aggr.	Taraxacum sect. Palustria	sect.
Taraxacum sect. Ruderalia	sect.	Taraxacum sect. Taraxacum	sect.
Taraxacum spectabile aggr.	aggr.	Taraxacum sect. Spectabilia	sect.
Tephroseris helenitis subsp. helenitis var. helenitis	subsp.	Tephroseris helenitis subsp. helenitis	subsp.
Tephroseris integrifolia aggr.	aggr.	Tephroseris integrifolia	sp.
Tephroseris longifolia aggr.	aggr.	Tephroseris longifolia	sp.
Tetragonolobus maritimus subsp. siliquosus	subsp.	Lotus maritimus	sp.
Tetragonolobus maritimus subsp. siliquosus	Subspecies	Lotus maritimus
Teucrium scordium aggr.	aggr.	Teucrium scordium	sp.
Teucrium scorodonia subsp. scorodonia	subsp.	Teucrium scorodonia	sp.	Autonym
Thalictrum bauhinii	sp.	Thalictrum simplex subsp. simplex	subsp.	POWO (2022)
Thalictrum flexuosum		Thalictrum minus
Thalictrum minus subsp. dunense	Subspecies	Thalictrum minus subsp. saxatile
Thalictrum tenuifolium	Species	Thalictrum simplex subsp. tenuifolium
Thea sinensis	sp.	Camellia sinensis	sp.
Thesium alpinum var. alpinum	var.	Thesium alpinum	sp.	Autonym
Thesium arvense	sp.	Thesium ramosum	sp.	Euro+Med (2022)
Thesium arvense	Species	Thesium ramosum
Thlaspi alpestre aggr.	aggr.	Noccaea caerulescens aggr.	aggr.
Thlaspi caerulescens aggr.	aggr.	Noccaea caerulescens aggr.	aggr.
Thlaspi improperum	sp.	Noccaea perfoliata
Thlaspi montanum aggr.	aggr.	Noccaea montana aggr.	aggr.
Thlaspi perfoliatum aggr.	aggr.	Noccaea perfoliata	sp.
Thlaspi perfoliatum subsp. perfoliatum	subsp.	Noccaea perfoliata	sp.	Autonym
Thlaspi rotundifolium aggr.	aggr.	Noccaea rotundifolia aggr.	aggr.
Thlaspi rotundifolium subsp. rotundifolium	subsp.	Noccaea rotundifolia subsp. rotundifolia	subsp.
Thymelaea calycina subsp. ruizii		Thymelaea ruizii
Thymelaea dioica subsp. dioica	subsp.	Thymelaea dioica	sp.	Autonym
Thymelaea passerina subsp. passerina	subsp.	Thymelaea passerina	sp.	Autonym
Thymus glabrescens subsp. glabrescens		Thymus odoratissimus
Thymus pannonicus aggr.	aggr.	Thymus serpyllum aggr.	aggr.
Thymus praecox subsp. praecox var. praecox	subsp.	Thymus praecox subsp. praecox	subsp.
Thymus pulegioides subsp. pulegioides var. pulegioides	subsp.	Thymus pulegioides subsp. pulegioides	subsp.
Thymus serpyllum subsp. serpyllum var. serpyllum	subsp.	Thymus serpyllum subsp. serpyllum	subsp.
Thymus sibthorpii subsp. tosevii		Thymus sibthorpii
Tilia ×vulgaris		Tilia × europaea
Tilia sibirica	sp.	Tilia cordata	sp.
Tilia taquetii	sp.	Tilia amurensis	sp.
Tofieldia pusilla subsp. pusilla	subsp.	Tofieldia pusilla	sp.	Autonym
Torilis humilis		Torilis leptophylla
Tragopogon floccosus subsp. floccosus		Tragopogon floccosus
Tragopogon porrifolius aggr.	aggr.	Tragopogon porrifolius	sp.
Tragopogon pratensis aggr.	aggr.	Tragopogon pratensis	sp.
Trapa natans subsp. natans	subsp.	Trapa natans	sp.	Autonym
Trichophorum cespitosum aggr.	aggr.	Trichophorum cespitosum	sp.
Trifolium arvense aggr.	aggr.	Trifolium arvense	sp.
Trifolium arvense subsp. arvense	subsp.	Trifolium arvense	sp.	Autonym
Trifolium aureum aggr.	aggr.	Trifolium aureum aggr. s.l.	aggr. s.l.
Trifolium aureum subsp. aureum	subsp.	Trifolium aureum	sp.	Autonym
Trifolium biasolettianum	sp.	Trifolium repens subsp. prostratum
Trifolium dubium + micranthum	list	Trifolium dubium aggr.	aggr.
Trifolium hybridum aggr.	aggr.	Trifolium hybridum	sp.
Trifolium hybridum var. parviflorum	Variety	Trifolium hybridum subsp. hybridum
Trifolium incarnatum aggr.	aggr.	Trifolium incarnatum	sp.
Trifolium montanum aggr.	aggr.	Trifolium montanum	sp.
Trifolium nivale	sp.	Trifolium pratense var. nivale
Trifolium pratense subsp. nivale		Trifolium pratense var. nivale	sp.
Trifolium repens aggr.	aggr.	Trifolium repens	sp.
Trifolium resupinatum aggr.	aggr.	Trifolium resupinatum	sp.
Trifolium striatum subsp. striatum	subsp.	Trifolium striatum	sp.	Autonym
Trifolium subterraneum var. brachycladum		Trifolium subterraneum subsp. subterraneum	subsp.
Trigonella fischerana		Medicago fischeriana
Trinia glauca aggr.	aggr.	Trinia glauca	sp.
Trinia lessingii	Species	Trinia kitaibelii
Trisetaria alpestris	Species	Trisetum alpestre
Trisetaria argentea	Species	Trisetum argenteum
Trisetaria gracilis	Species	Trisetum gracile
Trisetaria spicata subsp. ovatipaniculata	Subspecies	Trisetum spicatum
Trisetaria villosa	Species	Trisetum bertolonii
Triticum aestivum subsp. polonicum	Subspecies	Triticum turgidum subsp. polonicum
Triticum x requienii	Hybrid-sp.	x Aegilotriticum triticoides		WFO
Tritonia crocosmiiflora	Species	Crocosmia x crocosmiiflora	hybr.-sp.	WFO
Tulipa lortetii	Species	Tulipa agenensis
Tulipa rubidusa	sp.	Tulipa gesneriana
Tulipa sedunii	sp.	Tulipa gesneriana
Tulipa sylvestris aggr.	aggr.	Tulipa sylvestris	sp.
Ulex europaeus subsp. europaeus var. europaeus	subsp.	Ulex europaeus subsp. europaeus	sp.	Autonym
Ulmus glabra aggr.	aggr.	Ulmus glabra aggr. s.l.	aggr. s.l.
Urtica dioica aggr.	aggr.	Urtica dioica	sp.
Utricularia intermedia aggr.	aggr.	Utricularia intermedia aggr.	aggr.
Vaccinium microcarpum + oxycoccos	list	Vaccinium oxycoccos aggr.	aggr.
Vaccinium minus	sp.	Vaccinium vitis-idaea subsp. minor
Vaccinium uliginosum aggr.	aggr.	Vaccinium uliginosum	sp.
Vaccinium uliginosum subsp. pubescens	subsp.	Vaccinium uliginosum	sp.
Vaccinium uliginosum subsp. uliginosum	subsp.	Vaccinium uliginosum	sp.	Autonym
Vaccinium vitis-idaea aggr.	aggr.	Vaccinium vitis-idaea	sp.
Valeriana celtica aggr.	aggr.	Valeriana celtica	sp.
Valeriana dioica + simplicifolia	list	Valeriana dioica aggr.	aggr.
Valeriana montana subsp. montana	subsp.	Valeriana montana	sp.	Autonym
Valeriana officinalis aggr.	aggr.	Valeriana officinalis aggr.	aggr.
Valerianella dentata subsp. dentata	subsp.	Valerianella dentata	sp.	Autonym
Valerianella pumila subsp. pumila	subsp.	Valerianella coronata	sp.	Autonym
Veratrum album + lobelianum	list	Veratrum album aggr.	aggr.
Veratrum album aggr.	aggr.	Veratrum album aggr.	aggr.
Veratrum album subsp. album	subsp.	Veratrum album	sp.	Autonym
Verbascum alpinum	sp.	Verbascum lanatum	sp.	WFO (2022)
Verbascum alpinum		Verbascum lanatum	sp.
Verbascum alpinum		Verbascum lanatum subsp. lanatum
Verbascum x debeauxii	hyb.-sp.	Verbascum x diphyon	hyb.-sp.	https://powo.science.kew.org/taxon/urn:lsid:ipni.org:names:77122419-1
Verbascum x pseudoblattaria	hyb.-sp.	Verbascum x lichnitidi-blattaria	hyb.-sp.
Verbascum x ramosissimum	hyb.-sp.	Verbascum x bastardii	hyb.-sp.	https://powo.science.kew.org/taxon/urn:lsid:ipni.org:names:770087-1
Veronica crassifolia	sp.	Veronica orchidea	sp.	https://powo.science.kew.org/taxon/811861-1
Veronica fruticans subsp. cantabrica		Veronica fruticans subsp. cantabrica
Veronica fruticans subsp. cantabrica		Veronica fruticans subsp. cantabrica
Veronica fruticans subsp. cantabrica	subsp.	Veronica fruticans	sp.
Veronica micans	sp.	Veronica chamaedrys subsp. micans
Veronica nummularia subsp. cantabrica		Veronica nummularia
Veronica propinqua	sp.	Veronica vendettadeae	sp.	https://powo.science.kew.org/taxon/812521-1
Veronica prostrata subsp. prostrata	subsp.	Veronica prostrata	sp.	Autonym
Veronica serpyllifolia aggr.	aggr.	Veronica serpyllifolia	sp.
Veronica serpyllifolia subsp. langei		Veronica serpyllifolia
Veronica telephiifolia subsp. glareosa		Veronica telephiifolia
Vicia consentina	sp.	Vicia villosa	sp.	WFO (2022)
Vicia eriocalyx	sp.	Vicia sepium
Vicia eriocarpa	Species	Vicia villosa subsp. eriocarpa
Vicia montana	sp.	Vicia sepium
Vicia sativa aggr.	aggr.	Vicia sativa	sp.
Vicia sepium aggr.	aggr.	Vicia sepium	sp.
Vicia sepium var. eriocalyx	Variety	Vicia sepium
Vicia sepium var. montana	Variety	Vicia sepium
Vicia sepium var. sepium	var.	Vicia sepium	sp.	Autonym
Vicia tetrasperma subsp. tetrasperma	subsp.	Vicia tetrasperma	sp.	Autonym
Vicia villosa aggr.	aggr.	Vicia villosa	sp.
Vincetoxicum hirundinaria aggr.	aggr.	Vincetoxicum hirundinaria	sp.
Viola alba aggr.	aggr.	Viola alba	sp.
Viola canina aggr.	aggr.	Viola canina	sp.
Viola cretica subsp. cretica	subsp.	Viola alba subsp. cretica	subsp.
Viola cretica subsp. glabra	subsp.	Viola alba subsp. cretica	subsp.
Viola kitaibeliana subsp. kitaibeliana	subsp.	Viola kitaibeliana	sp.	Autonym
Viola lutea aggr.	aggr.	Viola lutea	sp.
Viola persicifolia var. lacteaeoides	var.	Viola stagnina	sp.
Viola persicifolia var. persicifolia	var.	Viola stagnina	sp.	Autonym
Viola reichenbachiana aggr.	aggr.	Viola sylvestris aggr.	aggr.
Viola riviniana aggr.	aggr.	Viola sylvestris aggr.	aggr.
Viola riviniana var. riviniana	var.	Viola riviniana	sp.	Autonym
Viola rupestris subsp. rupestris	subsp.	Viola rupestris	sp.	Autonym
Viola saxatilis + subalpina	list	Viola tricolor subsp. alpestris	subsp.
Viola stagnina aggr.	aggr.	Viola persicifolia aggr.	aggr.
Viola subalpina	sp.	Viola tricolor subsp. alpestris	subsp.
Viola tricolor aggr.	aggr.	Viola tricolor aggr. s.l.	aggr. s.l.
Viola tricolor subsp. tricolor var. tricolor	subsp.	Viola tricolor subsp. tricolor	subsp.
Viola x castillensis	hyb.-sp.	Viola x adulterina	hyb.-sp.	Müller et al. (2021)
Viscum album aggr.	aggr.	Viscum album	sp.
Viscum laxum subsp. laxum	subsp.	Viscum album subsp. album	subsp.
Vitis vinifera subsp. vinifera	subsp.	Vitis vinifera	sp.	Autonym
Volutaria tubiflora	Species	Volutaria lippii
Weigela praecox	sp.	Weigela florida	sp.
Woodsia ilvensis aggr.	aggr.	Woodsia ilvensis aggr. s.l.	aggr. s.l.
x Agropogon littoralis	hyb.-g.	x Agropogon lutosus	hyb.-g.
x Festulolium loliaceum	hyb.-sp.	x Schedolium loliaceum	hyb.-sp.
Xanthium albinum subsp. albinum	subsp.	Xanthium orientale subsp. riparium	subsp.
Xanthium catharticum	sp.	Xanthium spinosum	sp.	WFO (2022)
Xanthium orientale aggr.	aggr.	Xanthium orientale	sp.
Xanthoselinum alsaticum subsp. alsaticum var. alsaticum	subsp.	Peucedanum alsaticum	sp.	Autonym
Zannichellia palustris subsp. palustris	subsp.	Zannichellia palustris	sp.	Autonym
Zannichellia prodanii	sp.	Zannichellia palustris	sp.

## Sheet: Table S3.5 - Concept synonymy
Name.source.harmonized	Rank.source	EIV.system	Taxon.accepted	Rank.accepted
Acer monspessulanum	sp.	France	Acer monspessulanum subsp. monspessulanum	subsp.
Acer obtusatum	sp.	Italy	Acer obtusatum subsp. obtusatum	subsp.
Acer opalus	sp.	France	Acer opalus aggr.	aggr.
Achillea barrelieri	sp.	Italy	Achillea barrelieri subsp. barrelieri	subsp.
Achillea distans	sp.	Alps	Achillea distans subsp. distans
Achillea distans	sp.	Italy	Achillea distans subsp. distans	subsp.
Achillea erba-rotta	sp.	Alps	Achillea erba-rotta subsp. erba-rotta	subsp.
Achillea erba-rotta	sp.	Italy	Achillea erba-rotta subsp. erba-rotta	subsp.
Achillea millefolium	sp.	Alps	Achillea millefolium subsp. millefolium	subsp.
Achillea millefolium p. p.	p. p.	Ukraine	Achillea millefolium aggr.	aggr.
Achillea millefolium s.str.	s.str.	Hungary_Borhidi	Achillea millefolium	sp.
Achillea nobilis	sp.	Alps	Achillea nobilis subsp. nobilis
Achillea nobilis	sp.	Ukraine	Achillea nobilis subsp. nobilis	subsp.
Achillea ptarmica	sp.	France	Achillea ptarmica aggr.	aggr.
Achillea rupestris	sp.	Italy	Achillea rupestris subsp. rupestris	subsp.
Achillea virescens	sp.	Italy	Achillea virescens subsp. virescens	subsp.
Achnatherum bromoides s.l.	s.l.	Greece	Achnatherum bromoides	sp.
Acinos alpinus	sp.	Romania	Clinopodium alpinum subsp. alpinum	subsp.
Aconitum anthora	sp.	Ukraine	Aconitum anthora subsp. anthora	subsp.
Aconitum moldavicum	sp.	Ukraine	Aconitum moldavicum subsp. moldavicum	subsp.
Aconitum napellus	sp.	Alps	Aconitum napellus subsp. napellus	subsp.
Aconitum napellus	sp.	France	Aconitum napellus aggr.	aggr.
Aconitum napellus s.l.	s.l.	British_Isles	Aconitum napellus	sp.
Aconitum paniculatum	sp.	Alps	Aconitum degenii subsp. degenii	subsp.
Aconitum paniculatum	sp.	Ukraine	Aconitum degenii aggr.	aggr.
Aconitum variegatum	sp.	Alps	Aconitum variegatum subsp. variegatum	subsp.
Aconitum variegatum	sp.	France	Aconitum variegatum aggr.	aggr.
Adenostyles alpina	sp.	Italy	Adenostyles alpina subsp. alpina	subsp.
Adonis aestivalis	sp.	Alps	Adonis aestivalis subsp. aestivalis
Aegilops comosa s.l.	s.l.	Greece	Aegilops comosa	sp.
Aegilops neglecta s.l.	s.l.	Greece	Aegilops neglecta	sp.
Aethionema saxatile	sp.	Alps	Aethionema saxatile subsp. saxatile	subsp.
Aethusa cynapium	sp.	Alps	Aethusa cynapium subsp. cynapium
Agrimonia eupatoria	sp.	Ukraine	Agrimonia eupatoria subsp. eupatoria	subsp.
Agropyron intermedium s.str.	s.str.	Poland	Elytrigia intermedia subsp. intermedia	subsp.
Agrostis alba	sp.	Serbia	Agrostis stolonifera aggr.	aggr.
Agrostis canina s.l.	s.l.	British_Isles	Agrostis canina	sp.
Agrostis canina s.str.	s.str.	Hungary_Borhidi	Agrostis canina	sp.
Agrostis stolonifera	sp.	Italy	Agrostis stolonifera subsp. stolonifera	subsp.
Agrostis stolonifera s.l.	s.l.	Poland	Agrostis stolonifera	sp.
Aira caryophyllea	sp.	Alps	Aira caryophyllea subsp. caryophyllea
Aira caryophyllea	sp.	Italy	Aira caryophyllea subsp. caryophyllea	subsp.
Ajuga chamaepitys	sp.	Ukraine	Ajuga chamaepitys subsp. chamaepitys	subsp.
Alchemilla glaucescens s.l.	s.l.	European_Mires	Alchemilla glaucescens	sp.
Alchemilla plicatula	sp.	Spain_Asturias	Alchemilla catalaunica	sp.
Alchemilla vulgaris	sp.	Austria	Alchemilla acutiloba	sp.
Alchemilla vulgaris	sp.	Czech_Republic	Alchemilla acutiloba	sp.
Alchemilla vulgaris	sp.	European_Mires	Alchemilla vulgaris aggr. s.l.	aggr. s.l.
Alchemilla vulgaris	sp.	Germany	Alchemilla acutiloba	sp.
Alchemilla vulgaris	sp.	Hungary_Soo	Alchemilla acutiloba	sp.
Alchemilla vulgaris	sp.	Italy	Alchemilla acutiloba	sp.
Alchemilla vulgaris	sp.	Serbia	Alchemilla vulgaris aggr. s.l.	aggr. s.l.
Alchemilla vulgaris	sp.	USSR_Ramensky	Alchemilla acutiloba	sp.
Alchemilla vulgaris aggr.	aggr.	Alps	Alchemilla vulgaris aggr. s.l.	aggr. s.l.
Alchemilla vulgaris aggr.	aggr.	Austria	Alchemilla vulgaris aggr.	aggr.
Alchemilla vulgaris aggr.	aggr.	Austria_Pannonian	Alchemilla vulgaris aggr.	aggr.
Alchemilla vulgaris aggr.	aggr.	British_Isles	Alchemilla vulgaris aggr.	aggr.
Alchemilla vulgaris aggr.	aggr.	European_Mires	Alchemilla vulgaris aggr.	aggr.
Alchemilla vulgaris aggr.	aggr.	Germany_GDR	Alchemilla vulgaris aggr.	aggr.
Alchemilla vulgaris aggr.	aggr.	Netherlands	Alchemilla vulgaris aggr.	aggr.
Alchemilla vulgaris s.l.	s.l.	USSR_Tsyganov	Alchemilla vulgaris aggr.	aggr.
Alchemilla vulgaris s.str.	s.str.	Netherlands	Alchemilla vulgaris aggr.	aggr.
Alchemilla vulgaris s.str.	s.str.	USSR_Tsyganov	Alchemilla vulgaris aggr.	aggr.
Alkanna tinctoria s.l.	s.l.	Greece	Alkanna tinctoria	sp.
Allium callimischon s.l.	s.l.	Greece	Allium callimischon	sp.
Allium carinatum	sp.	Alps	Allium carinatum subsp. carinatum
Allium flavescens	sp.	Ukraine	Allium flavescens subsp. flavescens	subsp.
Allium paniculatum	sp.	Ukraine	Allium paniculatum subsp. paniculatum	subsp.
Alnus viridis	sp.	Alps	Alnus viridis subsp. viridis	subsp.
Alnus viridis aggr.	aggr.	Alps	Alnus viridis subsp. viridis	subsp.
Alopecurus himalaicus	sp.	European_Mires	Alopecurus riloensis	sp.
Alyssum montanum	sp.	Germany	Alyssum montanum aggr.	aggr.
Alyssum tortuosum	sp.	Ukraine	Odontarrhena tortuosa subsp. tortuosa	subsp.
Alyssum tortuosum subsp. tortuosum	subsp.	Romania	Odontarrhena tortuosa subsp. tortuosa	subsp.
Alyssum wulfenianum	sp.	Alps	Alyssum wulfenianum subsp. wulfenianum
Alyssum wulfenianum	sp.	Italy	Alyssum wulfenianum subsp. wulfenianum	subsp.
Amaranthus blitum	sp.	Germany	Amaranthus blitum aggr.	aggr.
Amaranthus hybridus	sp.	France	Amaranthus hybridus aggr.	aggr.
Amaranthus hybridus s.str.	s. str.	Romania	Amaranthus hybridus	sp.
Amelanchier ovalis	sp.	Alps	Amelanchier ovalis subsp. ovalis	subsp.
Amelanchier ovalis	sp.	Italy	Amelanchier ovalis subsp. ovalis	subsp.
Amelanchier ovalis aggr.	aggr.	Alps	Amelanchier ovalis subsp. ovalis	subsp.
Anacamptis morio	sp.	France	Anacamptis morio subsp. morio	subsp.
Anacamptis morio	sp.	Italy	Anacamptis morio subsp. morio	subsp.
Anacamptis morio	sp.	Ukraine	Anacamptis morio subsp. morio	subsp.
Anagallis arvensis	sp.	Netherlands	Anagallis arvensis aggr.	aggr.
Anagallis arvensis s.l.	s.l.	Greece	Anagallis arvensis	sp.
Anchusa arvensis	sp.	Germany	Lycopsis arvensis aggr.
Andrachne telephioides s.l.	s.l.	Greece	Andrachne telephioides	sp.
Androsace adfinis	sp.	Alps	Androsace adfinis subsp. adfinis
Androsace vitaliana	sp.	Alps	Androsace vitaliana subsp. vitaliana	subsp.
Anemone hortensis	sp.	France	Anemone hortensis aggr.	aggr.
Angelica archangelica s.str.	s.str.	Poland	Angelica archangelica subsp. archangelica	subsp.
Angelica sylvestris	sp.	Alps	Angelica sylvestris subsp. sylvestris	subsp.
Angelica sylvestris aggr.	aggr.	Alps	Angelica sylvestris subsp. sylvestris	subsp.
Anisantha madritensis s.l.	s.l.	Greece	Anisantha madritensis	sp.
Anthemis arvensis	sp.	Alps	Anthemis arvensis subsp. arvensis
Anthemis secundiramea	sp.	Italy	Anthemis secundiramea subsp. secundiramea	subsp.
Anthriscus sylvestris	sp.	Alps	Anthriscus sylvestris subsp. sylvestris
Anthyllis montana	sp.	Alps	Anthyllis montana subsp. montana	subsp.
Apera spica-venti	sp.	Ukraine	Apera spica-venti subsp. spica-venti	subsp.
Arabis alpina	sp.	Alps	Arabis alpina subsp. alpina
Arabis alpina	sp.	Sweden	Arabis alpina subsp. alpina	subsp.
Arabis alpina	sp.	Ukraine	Arabis alpina subsp. alpina	subsp.
Arabis alpina s.l.	s.l.	Greece	Arabis alpina	sp.
Arabis pumila	sp.	Germany	Arabis pumila aggr.	aggr.
Armeria alpina	sp.	France	Armeria alpina subsp. alpina	subsp.
Armeria arenaria	sp.	Alps	Armeria arenaria subsp. arenaria	subsp.
Armeria elongata	sp.	Czech_Republic	Armeria maritima aggr.	aggr.
Armeria maritima	sp.	France	Armeria maritima aggr.	aggr.
Armeria maritima s.l.	s.l.	Poland	Armeria maritima	sp.
Armeria maritima subsp. alpina	subsp.	Germany	Armeria alpina subsp. alpina	subsp.
Arrhenatherum elatius	sp.	Alps	Arrhenatherum elatius subsp. elatius	subsp.
Artemisia campestris	sp.	Alps	Artemisia campestris subsp. campestris
Artemisia campestris	sp.	Ukraine	Artemisia campestris subsp. campestris	subsp.
Artemisia campestris aggr.	aggr.	Alps	Artemisia campestris aggr.	aggr.
Artemisia campestris s.l.	s.l.	Poland	Artemisia campestris	sp.
Artemisia capillaris	sp.	Romania	Artemisia scoparia	sp.
Artemisia umbelliformis	sp.	Alps	Artemisia umbelliformis subsp. umbelliformis
Arum maculatum s.str.	s.str.	Hungary_Borhidi	Arum maculatum	sp.
Asarum europaeum	sp.	Alps	Asarum europaeum subsp. europaeum	subsp.
Asplenium adiantum-nigrum	sp.	Alps	Asplenium adiantum-nigrum subsp. adiantum-nigrum
Asplenium adiantum-nigrum	sp.	Germany	Asplenium adiantum-nigrum subsp. adiantum-nigrum	subsp.
Asplenium adiantum-nigrum	sp.	Romania	Asplenium adiantum-nigrum subsp. adiantum-nigrum	subsp.
Asplenium adiantum-nigrum s.l.	s.l.	British_Isles	Asplenium adiantum-nigrum	sp.
Asplenium obovatum	sp.	Alps	Asplenium obovatum subsp. obovatum
Asplenium ruta-muraria	sp.	Alps	Asplenium ruta-muraria subsp. ruta-muraria	subsp.
Asplenium trichomanes	sp.	Alps	Asplenium trichomanes subsp. trichomanes	subsp.
Aster tradescantii	sp.	Alps	Symphyotrichum parviflorum	sp.
Aster tradescantii	sp.	Austria	Symphyotrichum parviflorum	sp.
Aster tradescantii	sp.	Austria_Pannonian	Symphyotrichum parviflorum	sp.
Aster tradescantii	sp.	Germany_GDR	Symphyotrichum parviflorum	sp.
Aster tradescantii	sp.	Hungary_Borhidi	Symphyotrichum parviflorum	sp.
Aster tradescantii	sp.	Hungary_Soo	Symphyotrichum parviflorum	sp.
Aster tradescantii	sp.	Netherlands	Symphyotrichum parviflorum	sp.
Aster tradescantii	sp.	Poland	Symphyotrichum parviflorum	sp.
Aster tradescantii	sp.	Serbia	Symphyotrichum parviflorum	sp.
Aster tripolium subsp. pannonicus	subsp.	Austria	Tripolium pannonicum subsp. pannonicum	subsp.
Aster tripolium subsp. pannonicus	subsp.	Hungary_Borhidi	Tripolium pannonicum subsp. pannonicum	subsp.
Aster tripolium subsp. pannonicus	subsp.	Hungary_Soo	Tripolium pannonicum subsp. pannonicum	subsp.
Aster tripolium subsp. pannonicus	subsp.	Hungary_Zolyomi	Tripolium pannonicum subsp. pannonicum	subsp.
Aster tripolium subsp. tripolium	subsp.	Austria	Tripolium pannonicum subsp. pannonicum	subsp.
Aster tripolium subsp. tripolium	subsp.	Germany	Tripolium pannonicum subsp. tripolium	subsp.
Aster tripolium subsp. tripolium	subsp.	Romania	Tripolium pannonicum subsp. pannonicum	subsp.
Astragalus exscapus	sp.	Ukraine	Astragalus exscapus subsp. exscapus	subsp.
Astragalus hypoglottis	sp.	Alps	Astragalus hypoglottis subsp. hypoglottis	subsp.
Astragalus sempervirens	sp.	Alps	Astragalus sempervirens subsp. sempervirens
Astragalus vesicarius	sp.	Alps	Astragalus vesicarius subsp. vesicarius	subsp.
Astrantia major	sp.	Alps	Astrantia major subsp. major	subsp.
Atriplex prostrata	sp.	Netherlands	Atriplex hastata aggr. s.l.	aggr. s.l.
Atriplex prostrata s.l.	s.l.	Poland	Atriplex prostrata	sp.
Avena barbata s.l.	s.l.	Greece	Avena barbata	sp.
Avena sativa	sp.	Alps	Avena sativa subsp. sativa
Avena sterilis s.l.	s.l.	Greece	Avena sterilis	sp.
Avenella flexuosa	sp.	Alps	Avenella flexuosa subsp. flexuosa	subsp.
Avenula planiculmis s.str.	s.str.	Poland	Helictochloa planiculmis	sp.
Baldellia ranunculoides	sp.	France	Baldellia ranunculoides subsp. ranunculoides	subsp.
Baldellia ranunculoides	sp.	Sweden	Baldellia ranunculoides subsp. ranunculoides	subsp.
Ballota nigra	sp.	Alps	Ballota nigra subsp. nigra	subsp.
Ballota nigra subsp. meridionalis	subsp.	Czech_Republic	Ballota nigra subsp. foetida	subsp.
Ballota nigra subsp. meridionalis	subsp.	Germany	Ballota nigra subsp. foetida	subsp.
Ballota nigra subsp. meridionalis	subsp.	Romania	Ballota nigra subsp. foetida	subsp.
Barbarea vulgaris	sp.	Alps	Barbarea vulgaris subsp. vulgaris
Barbarea vulgaris	sp.	Ukraine	Barbarea vulgaris subsp. vulgaris	subsp.
Bellevalia dubia	sp.	Italy	Bellevalia dubia subsp. dubia	subsp.
Beta vulgaris s.l.	s.l.	Greece	Beta vulgaris aggr.	aggr.
Betula etnensis	sp.	Italy	Betula pendula var. pendula	var.
Betula pendula	sp.	Ukraine	Betula pendula var. pendula	subsp.
Betula pubescens	sp.	Alps	Betula pubescens var. pubescens	var.
Betula pubescens	sp.	Czech_Republic	Betula pubescens var. pubescens	var.
Betula pubescens	sp.	Ukraine	Betula pubescens var. pubescens	subsp.
Betula x hybrida	hyb.-sp.	Romania	Betula x intermedia	subsp.
Biarum tenuifolium s.l.	s.l.	Greece	Biarum tenuifolium	sp.
Bidens tripartita	sp.	Alps	Bidens tripartita subsp. tripartita
Bidens tripartita	sp.	France	Bidens tripartita aggr.	aggr.
Biscutella didyma s.l.	s.l.	Greece	Biscutella didyma	sp.
Biscutella laevigata	sp.	Alps	Biscutella laevigata subsp. laevigata
Blackstonia perfoliata	sp.	Alps	Blackstonia perfoliata subsp. perfoliata
Blackstonia perfoliata	sp.	Germany	Blackstonia perfoliata subsp. perfoliata	subsp.
Blackstonia perfoliata	sp.	Italy	Blackstonia perfoliata subsp. perfoliata	subsp.
Blackstonia perfoliata	sp.	Romania	Blackstonia perfoliata subsp. perfoliata	subsp.
Blackstonia perfoliata s.l.	s.l.	Greece	Blackstonia perfoliata	sp.
Brassica elongata	sp.	Alps	Brassica elongata subsp. elongata	subsp.
Brassica rapa	sp.	Alps	Brassica rapa subsp. rapa	subsp.
Brassica repanda	sp.	Alps	Brassica repanda subsp. repanda	subsp.
Brassica repanda	sp.	Italy	Brassica repanda subsp. repanda	subsp.
Briza media	sp.	Ukraine	Briza media subsp. media	subsp.
Bromopsis ramosa s.l.	s.l.	Slovenia	Bromopsis ramosa aggr.	aggr.
Bromus arvensis	sp.	Alps	Bromus arvensis subsp. arvensis
Bromus commutatus	sp.	Alps	Bromus commutatus subsp. commutatus
Bromus condensatus	sp.	Alps	Bromopsis condensata subsp. condensata
Bromus erectus	sp.	Alps	Bromopsis erecta subsp. erecta
Bromus erectus s.str.	s.str.	Hungary_Borhidi	Bromopsis erecta	sp.
Bromus hordeaceus	sp.	Alps	Bromus hordeaceus subsp. hordeaceus
Bromus hordeaceus	sp.	Germany	Bromus hordeaceus aggr.	aggr.
Bromus racemosus subsp. racemosus	subsp.	France	Bromus racemosus	sp.
Bromus racemosus subsp. racemosus	subsp.	Netherlands	Bromus racemosus	sp.
Bromus ramosus s.str.	s.str.	Hungary_Borhidi	Bromopsis ramosa	sp.
Bromus riparius subsp. riparius	subsp.	Romania	Bromopsis riparia subsp. riparia	subsp.
Bryonia cretica	sp.	France	Bryonia cretica aggr.	aggr.
Bufonia stricta s.l.	s.l.	Greece	Bufonia stricta	sp.
Buglossoides arvensis	sp.	Alps	Buglossoides arvensis subsp. arvensis
Buglossoides arvensis	sp.	Greece	Buglossoides arvensis subsp. arvensis	subsp.
Buglossoides arvensis	sp.	Ukraine	Buglossoides arvensis subsp. arvensis	subsp.
Bupleurum falcatum	sp.	Alps	Bupleurum falcatum subsp. falcatum	subsp.
Bupleurum falcatum	sp.	Romania	Bupleurum falcatum subsp. falcatum	subsp.
Bupleurum falcatum	sp.	Ukraine	Bupleurum falcatum subsp. falcatum	subsp.
Bupleurum ranunculoides	sp.	Alps	Bupleurum ranunculoides subsp. ranunculoides	subsp.
Calamintha menthifolia	sp.	Alps	Clinopodium menthifolium subsp. mentifolium
Calamintha nepeta	sp.	Alps	Clinopodium nepeta subsp. nepeta
Callitriche hamulata s.l.	s.l.	British_Isles	Callitriche hamulata	sp.
Callitriche stagnalis s.l.	s.l.	British_Isles	Callitriche stagnalis	sp.
Campanula rotundifolia s.str.	s.str.	Hungary_Borhidi	Campanula rotundifolia	sp.
Cardamine amara	sp.	Alps	Cardamine amara subsp. amara
Cardamine amara	sp.	Ukraine	Cardamine amara subsp. amara	subsp.
Cardamine amara s.l.	s.l.	European_Mires	Cardamine amara	sp.
Cardaminopsis arenosa	sp.	Alps	Arabidopsis arenosa subsp. arenosa	subsp.
Cardaminopsis arenosa	sp.	Ukraine	Arabidopsis arenosa subsp. arenosa	subsp.
Cardaminopsis arenosa s.l.	s.l.	Poland	Arabidopsis arenosa	sp.
Cardaminopsis arenosa s.str.	s.str.	Poland	Arabidopsis arenosa subsp. arenosa	sp.
Cardaminopsis halleri	sp.	Alps	Arabidopsis halleri subsp. halleri	subsp.
Cardaminopsis halleri	sp.	Poland	Arabidopsis halleri subsp. halleri	subsp.
Cardaminopsis halleri	sp.	Ukraine	Arabidopsis halleri subsp. halleri	subsp.
Cardaminopsis halleri s.l.	s.l.	Poland	Arabidopsis halleri	sp.
Cardaminopsis halleri subsp. halleri	subsp.	Romania	Arabidopsis halleri subsp. halleri	subsp.
Carduus defloratus	sp.	Alps	Carduus defloratus subsp. defloratus
Carduus defloratus	sp.	Italy	Carduus defloratus subsp. defloratus	subsp.
Carduus litigiosus	sp.	Alps	Carduus litigiosus subsp. litigiosus
Carduus nigrescens	sp.	Alps	Carduus nigrescens subsp. nigrescens	subsp.
Carduus nutans	sp.	Alps	Carduus nutans subsp. nutans
Carduus nutans	sp.	Romania	Carduus nutans subsp. nutans	subsp.
Carduus nutans	sp.	Sweden	Carduus nutans subsp. nutans	subsp.
Carduus nutans	sp.	Ukraine	Carduus nutans subsp. nutans	subsp.
Carex atrata	sp.	Italy	Carex atrata subsp. atrata	subsp.
Carex bigelowii	sp.	Romania	Carex bigelowii subsp. bigelowii	subsp.
Carex buxbaumii s.l.	s.l.	Poland	Carex buxbaumii aggr.	aggr.
Carex curvula	sp.	Alps	Carex curvula subsp. curvula	subsp.
Carex curvula	sp.	Italy	Carex curvula subsp. curvula	subsp.
Carex depressa	sp.	Romania	Carex depressa subsp. depressa	subsp.
Carex digitata	sp.	Czech_Republic	Carex digitata aggr.	aggr.
Carex divulsa	sp.	Alps	Carex divulsa subsp. divulsa
Carex divulsa	sp.	Czech_Republic	Carex divulsa subsp. divulsa	subsp.
Carex divulsa	sp.	France	Carex divulsa subsp. divulsa	subsp.
Carex divulsa	sp.	Italy	Carex divulsa subsp. divulsa	subsp.
Carex divulsa	sp.	Romania	Carex divulsa subsp. divulsa	subsp.
Carex divulsa s.l.	s.l.	Greece	Carex divulsa	sp.
Carex flacca	sp.	Alps	Carex flacca subsp. flacca	subsp.
Carex flacca	sp.	Ukraine	Carex flacca subsp. flacca	subsp.
Carex flava s.str.	s.str.	Hungary_Borhidi	Carex flava	sp.
Carex muricata	sp.	Alps	Carex muricata subsp. muricata
Carex muricata	sp.	France	Carex muricata subsp. muricata	subsp.
Carex muricata	sp.	Sweden	Carex muricata subsp. muricata	subsp.
Carex norvegica	sp.	Alps	Carex norvegica subsp. norvegica	subsp.
Carex norvegica	sp.	Sweden	Carex norvegica subsp. norvegica	subsp.
Carex ornithopoda aggr.	aggr.	Alps	Carex ornithopoda	sp.
Carex pediformis	sp.	Ukraine	Carex pediformis subsp. pediformis	subsp.
Carex sempervirens s.l.	s.l.	Poland	Carex sempervirens	sp.
Carlina acaulis	sp.	Alps	Carlina acaulis subsp. acaulis	subsp.
Carlina biebersteinii	sp.	Alps	Carlina biebersteinii subsp. biebersteinii
Carlina corymbosa s.l.	s.l.	Greece	Carlina corymbosa	sp.
Catapodium rigidum	sp.	Italy	Catapodium rigidum subsp. rigidum	subsp.
Centaurea argentea s.l.	s.l.	Greece	Centaurea argentea	sp.
Centaurea jacea	sp.	Romania	Centaurea jacea subsp. jacea	subsp.
Centaurea jacea	sp.	Ukraine	Centaurea jacea subsp. jacea	subsp.
Centaurea jacea s.str.	s.str.	Hungary_Borhidi	Centaurea jacea	sp.
Centaurea jordaniana	sp.	Alps	Centaurea jordaniana subsp. jordaniana	subsp.
Centaurea napulifera subsp. napulifera	subsp.	Romania	Cyanus thirkei	sp.
Centaurea nigrescens	sp.	Alps	Centaurea nigrescens subsp. nigrescens
Centaurea paniculata	sp.	France	Centaurea paniculata aggr.	aggr.
Centaurea phrygia	sp.	Ukraine	Centaurea phrygia subsp. phrygia	subsp.
Centaurea scabiosa	sp.	Alps	Centaurea scabiosa subsp. scabiosa	subsp.
Centaurea scabiosa	sp.	Romania	Centaurea scabiosa subsp. scabiosa	subsp.
Centaurea scabiosa	sp.	Ukraine	Centaurea scabiosa subsp. scabiosa	subsp.
Centaurea scabiosa s.str.	s.str.	Hungary_Borhidi	Centaurea scabiosa	sp.
Centaurea stoebe	sp.	Ukraine	Centaurea stoebe subsp. stoebe	subsp.
Centaurea triumfettii	sp.	Alps	Cyanus triumfettii subsp. triumfettii
Centaurium erythraea s.l.	s.l.	Greece	Centaurium erythraea	sp.
Centaurium pulchellum	sp.	Ukraine	Centaurium pulchellum subsp. pulchellum	subsp.
Centaurium tenuiflorum s.l.	s.l.	Greece	Centaurium tenuiflorum	sp.
Cerastium arvense	sp.	Alps	Cerastium arvense subsp. arvense
Cerastium arvense s.str.	s.str.	Poland	Cerastium arvense subsp. arvense	subsp.
Cerastium brachypetalum	sp.	Alps	Cerastium brachypetalum subsp. brachypetalum
Cerastium brachypetalum	sp.	Italy	Cerastium brachypetalum subsp. brachypetalum	subsp.
Cerastium carinthiacum	sp.	Alps	Cerastium carinthiacum subsp. carinthiacum
Cerastium diffusum	sp.	Italy	Cerastium diffusum subsp. diffusum	subsp.
Cerastium diffusum	sp.	Sweden	Cerastium diffusum subsp. diffusum	subsp.
Cerastium fontanum	sp.	Alps	Cerastium fontanum subsp. fontanum
Cerastium fontanum	sp.	Czech_Republic	Cerastium fontanum subsp. fontanum	subsp.
Cerastium fontanum	sp.	Germany	Cerastium fontanum subsp. fontanum	subsp.
Cerastium fontanum	sp.	Italy	Cerastium fontanum subsp. fontanum	subsp.
Cerastium fontanum	sp.	Ukraine	Cerastium fontanum subsp. fontanum	subsp.
Cerastium fontanum s.l.	s.l.	European_Mires	Cerastium fontanum	sp.
Cerastium ligusticum	sp.	Italy	Cerastium ligusticum subsp. ligusticum	subsp.
Cerastium lucorum	sp.	Alps	Cerastium fontanum subsp. lucorum
Cerastium lucorum	sp.	Czech_Republic	Cerastium fontanum subsp. lucorum	subsp.
Cerastium lucorum	sp.	Italy	Cerastium fontanum subsp. lucorum	subsp.
Cerastium lucorum	sp.	Ukraine	Cerastium fontanum subsp. lucorum	subsp.
Cerastium pumilum	sp.	Alps	Cerastium pumilum subsp. pumilum
Cerastium pumilum	sp.	Czech_Republic	Cerastium pumilum subsp. pumilum	subsp.
Cerastium pumilum	sp.	Germany	Cerastium pumilum subsp. pumilum	subsp.
Cerastium pumilum	sp.	Italy	Cerastium pumilum subsp. pumilum	subsp.
Cerastium pumilum	sp.	Sweden	Cerastium pumilum subsp. pumilum	subsp.
Cerastium pumilum	sp.	Ukraine	Cerastium pumilum subsp. pumilum	subsp.
Cerastium strictum	sp.	Alps	Cerastium arvense subsp. strictum
Ceratophyllum demersum	sp.	Germany	Ceratophyllum demersum aggr.	aggr.
Ceratophyllum demersum s.str.	s.str.	Poland	Ceratophyllum demersum	sp.
Cerinthe major	sp.	France	Cerinthe major aggr.	aggr.
Cerinthe minor	sp.	Alps	Cerinthe minor subsp. minor	subsp.
Ceterach officinarum	sp.	Alps	Asplenium ceterach subsp. ceterach	subsp.
Ceterach officinarum s.str.	s.str.	Hungary_Borhidi	Asplenium ceterach	sp.
Chamaecytisus hirsutus subsp. hirsutus	subsp.	Romania	Cytisus hirsutus subsp. hirsutus	subsp.
Chenopodium album	sp.	Alps	Chenopodium album subsp. album
Chenopodium album	sp.	France	Chenopodium album aggr.	aggr.
Chenopodium strictum	sp.	Alps	Chenopodium betaceum	sp.
Chenopodium strictum	sp.	Austria	Chenopodium betaceum	sp.
Chenopodium strictum	sp.	Czech_Republic	Chenopodium betaceum	sp.
Chenopodium strictum	sp.	France	Chenopodium betaceum	sp.
Chenopodium strictum	sp.	Germany	Chenopodium album aggr.	aggr.
Chenopodium strictum	sp.	Germany	Chenopodium album aggr.	aggr.
Chenopodium strictum	sp.	Germany_GDR	Chenopodium betaceum	sp.
Chenopodium strictum	sp.	Hungary_Borhidi	Chenopodium betaceum	sp.
Chenopodium strictum	sp.	Hungary_Soo	Chenopodium betaceum	sp.
Chenopodium strictum	sp.	Romania	Chenopodium betaceum	sp.
Chenopodium strictum subsp. strictum	subsp.	Germany	Chenopodium betaceum	sp.
Chrysanthemum leucanthemum s.str.	s.str.	Hungary_Borhidi	Leucanthemum vulgare	sp.
Cirsium arvense s.str.	s.str.	USSR_Tsyganov	Cirsium arvense	sp.
Cistus creticus	sp.	Italy	Cistus creticus subsp. creticus	subsp.
Cleistogenes serotina	sp.	Romania	Cleistogenes serotina subsp. serotina	subsp.
Cleistogenes serotina	sp.	Ukraine	Cleistogenes serotina subsp. serotina	subsp.
Clinopodium vulgare	sp.	Alps	Clinopodium vulgare subsp. vulgare	subsp.
Cochlearia officinalis s.l.	s.l.	British_Isles	Cochlearia officinalis	sp.
Colutea arborescens	sp.	Alps	Colutea arborescens subsp. arborescens	subsp.
Consolida orientalis	sp.	Czechoslovakia_Jurko	Consolida hispanica	sp.
Consolida orientalis	sp.	Germany_GDR	Consolida hispanica	sp.
Consolida orientalis	sp.	Hungary_Borhidi	Consolida hispanica	sp.
Consolida orientalis	sp.	Romania	Consolida hispanica	sp.
Consolida orientalis	sp.	Serbia	Consolida hispanica	sp.
Consolida orientalis	sp.	Ukraine	Consolida hispanica	sp.
Consolida regalis	sp.	Alps	Consolida regalis subsp. regalis	subsp.
Consolida regalis	sp.	Ukraine	Consolida regalis subsp. regalis	subsp.
Consolida regalis	sp.	USSR_Ramensky	Consolida regalis subsp. regalis	subsp.
Convolvulus althaeoides	sp.	France	Convolvulus althaeoides subsp. althaeoides	subsp.
Convolvulus althaeoides	sp.	Italy	Convolvulus althaeoides subsp. althaeoides	subsp.
[truncated: 1,070 more rows]
